# Supplementary material for: Geometagenomics illuminates the impact of agriculture on the distribution and prevalence of plant viruses at the ecosystem scale
Source: PubMed Central journal article supplement (PMC5739011; doi:10.1038/ismej.2017.155), 2017-10-20

ML Tree 1  
Alphaflexiviridae

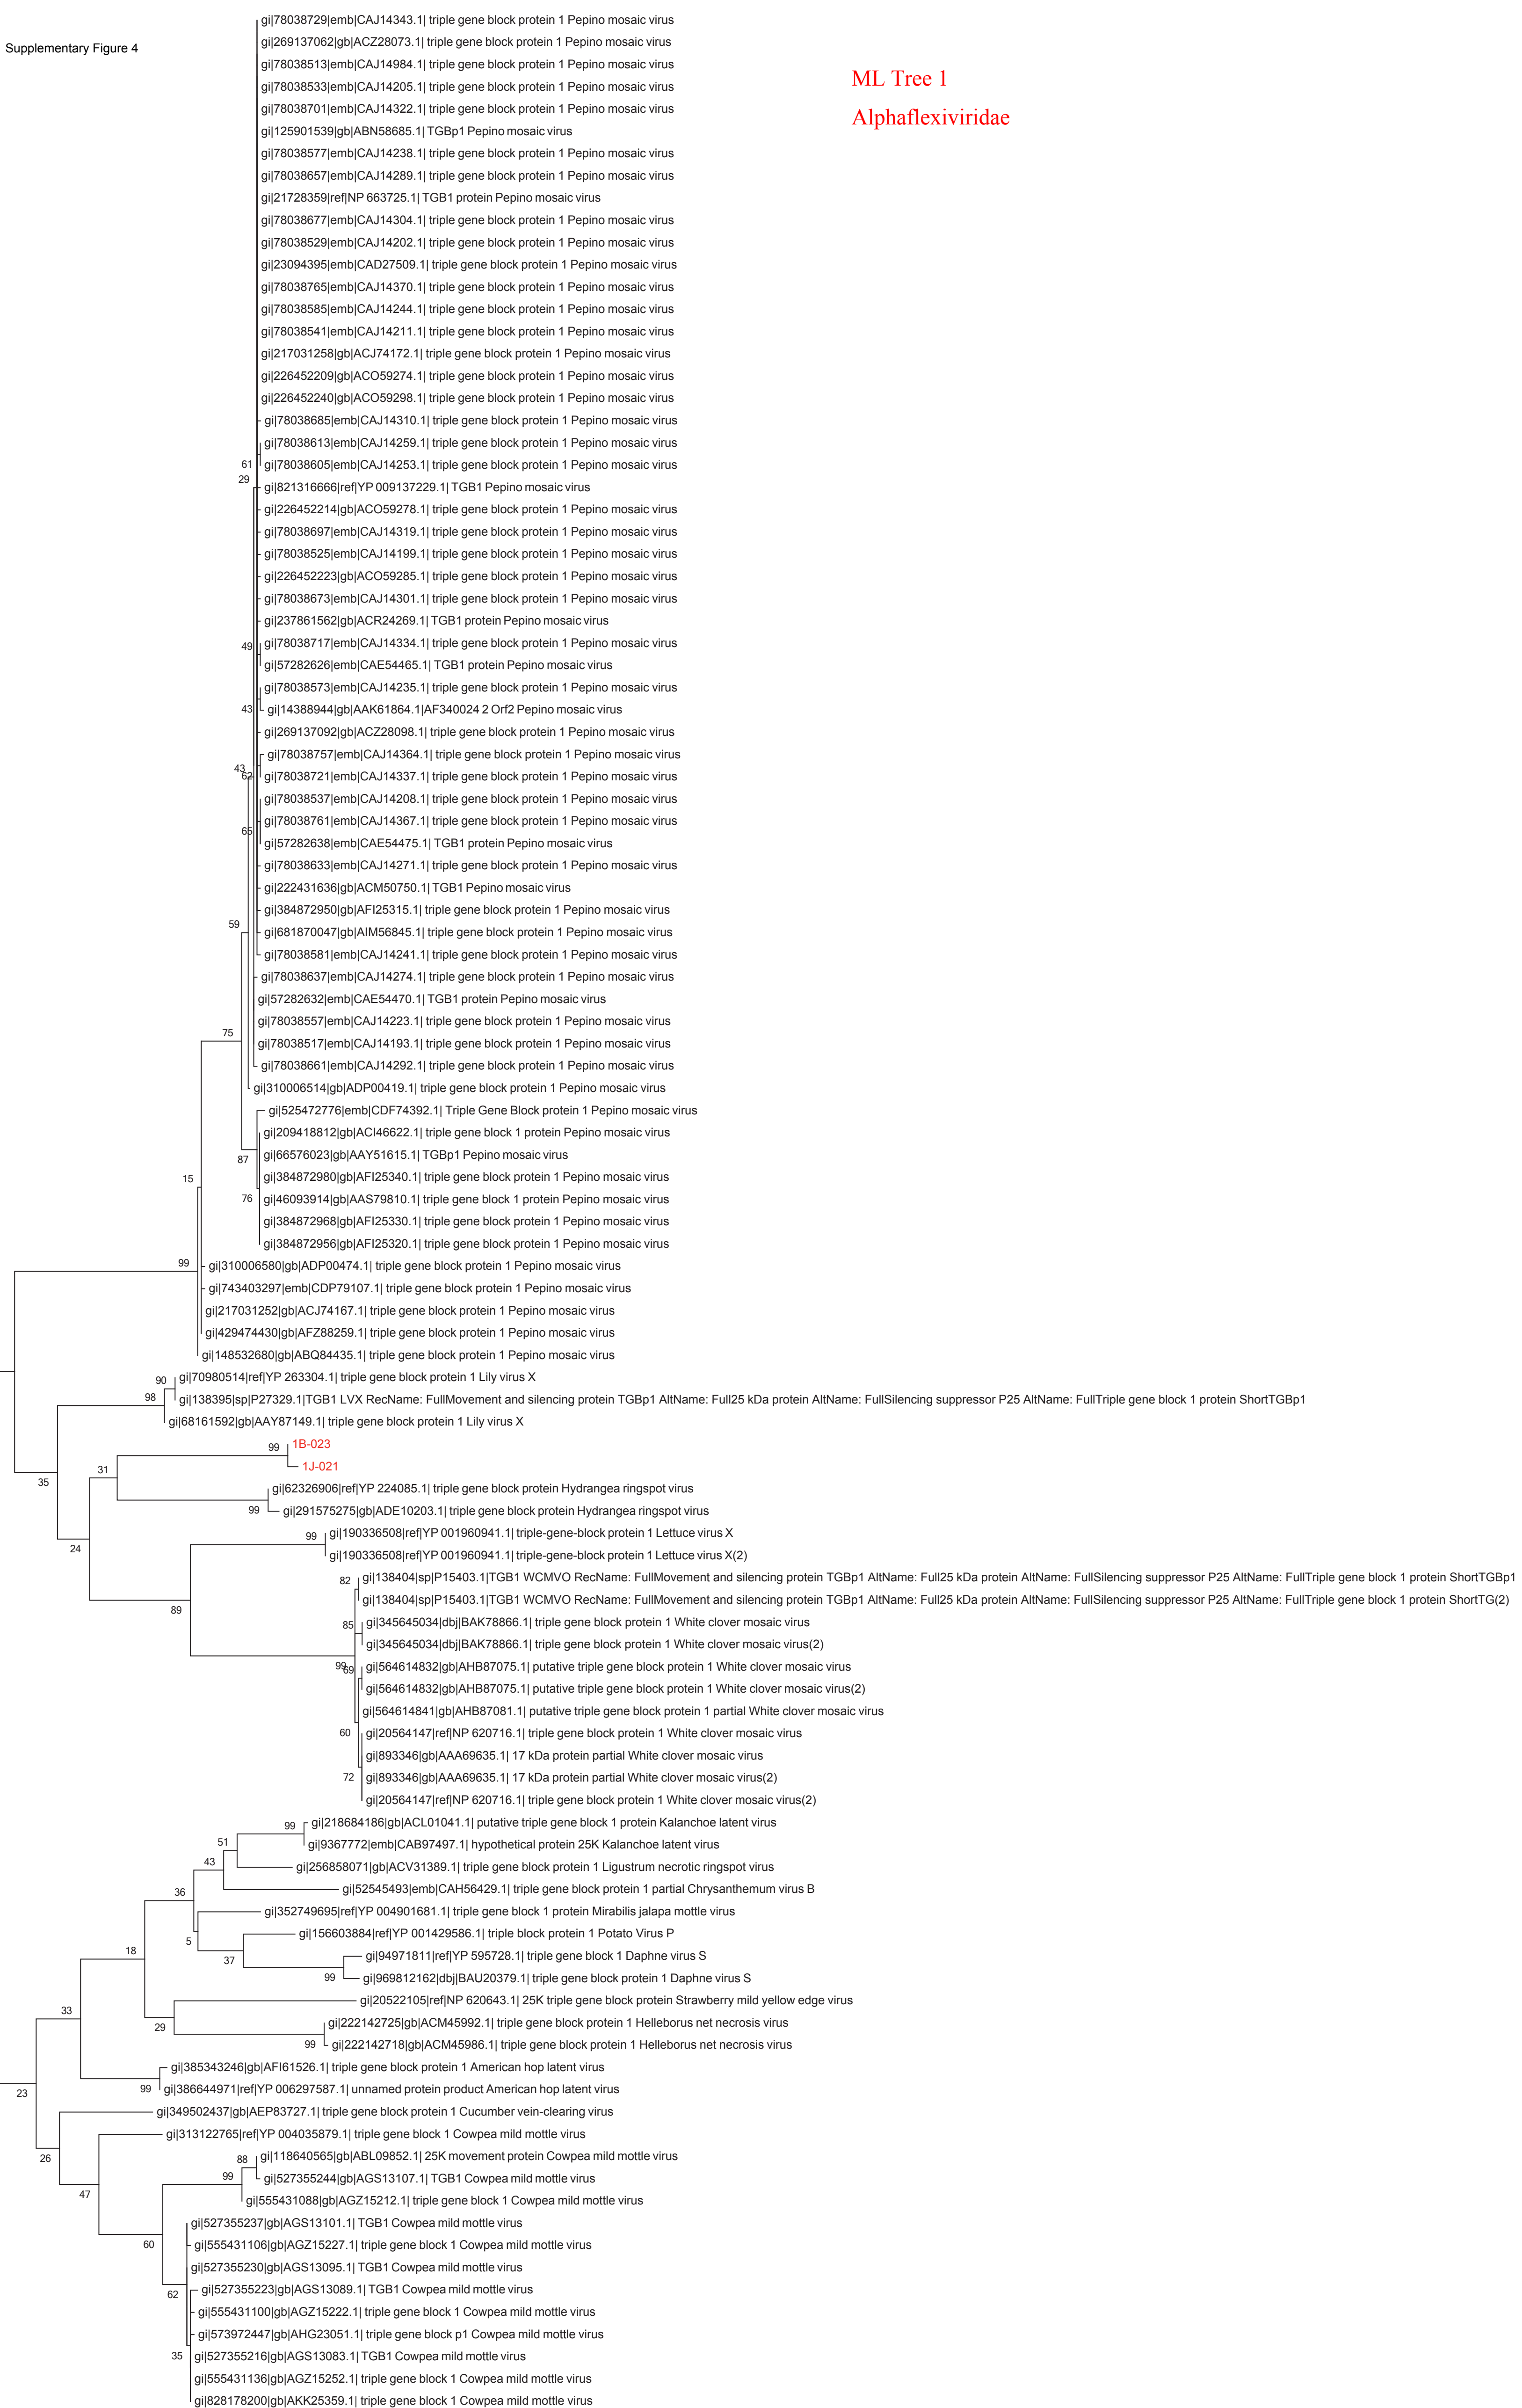

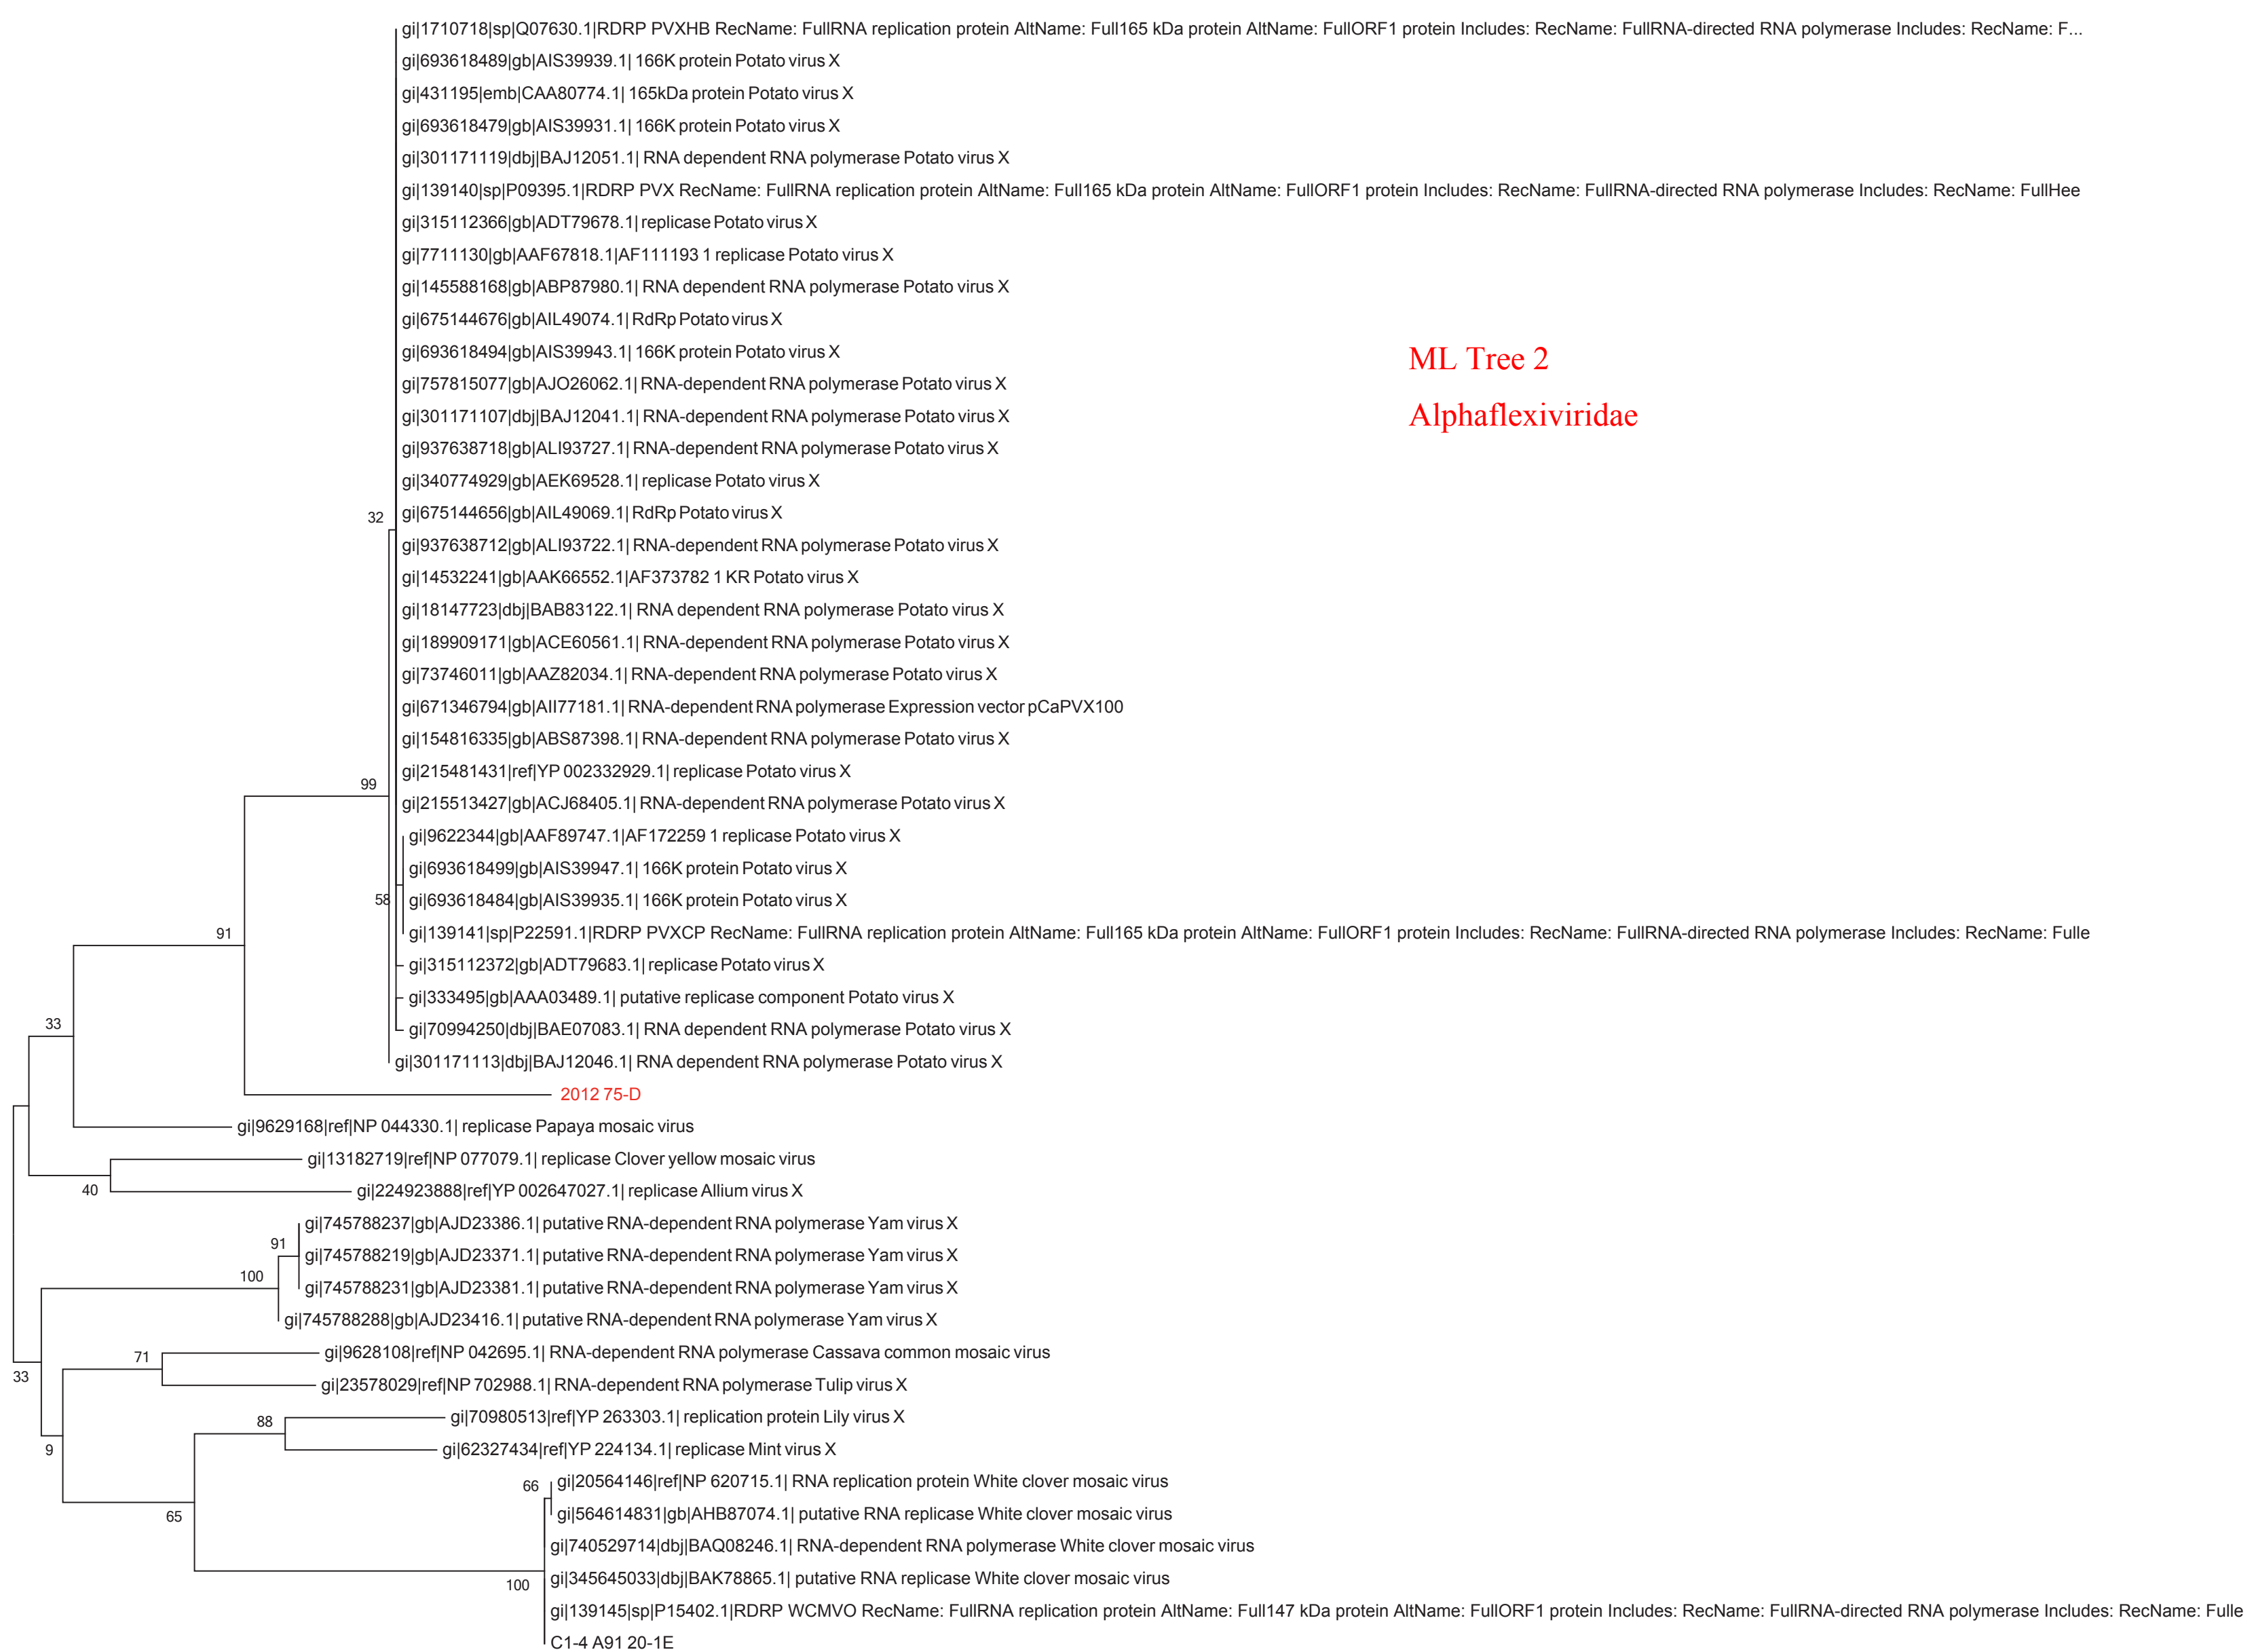

ML Tree 2  
Alphaflexiviridae

0.2



ML Tree 3  
Alphaflexiviridae

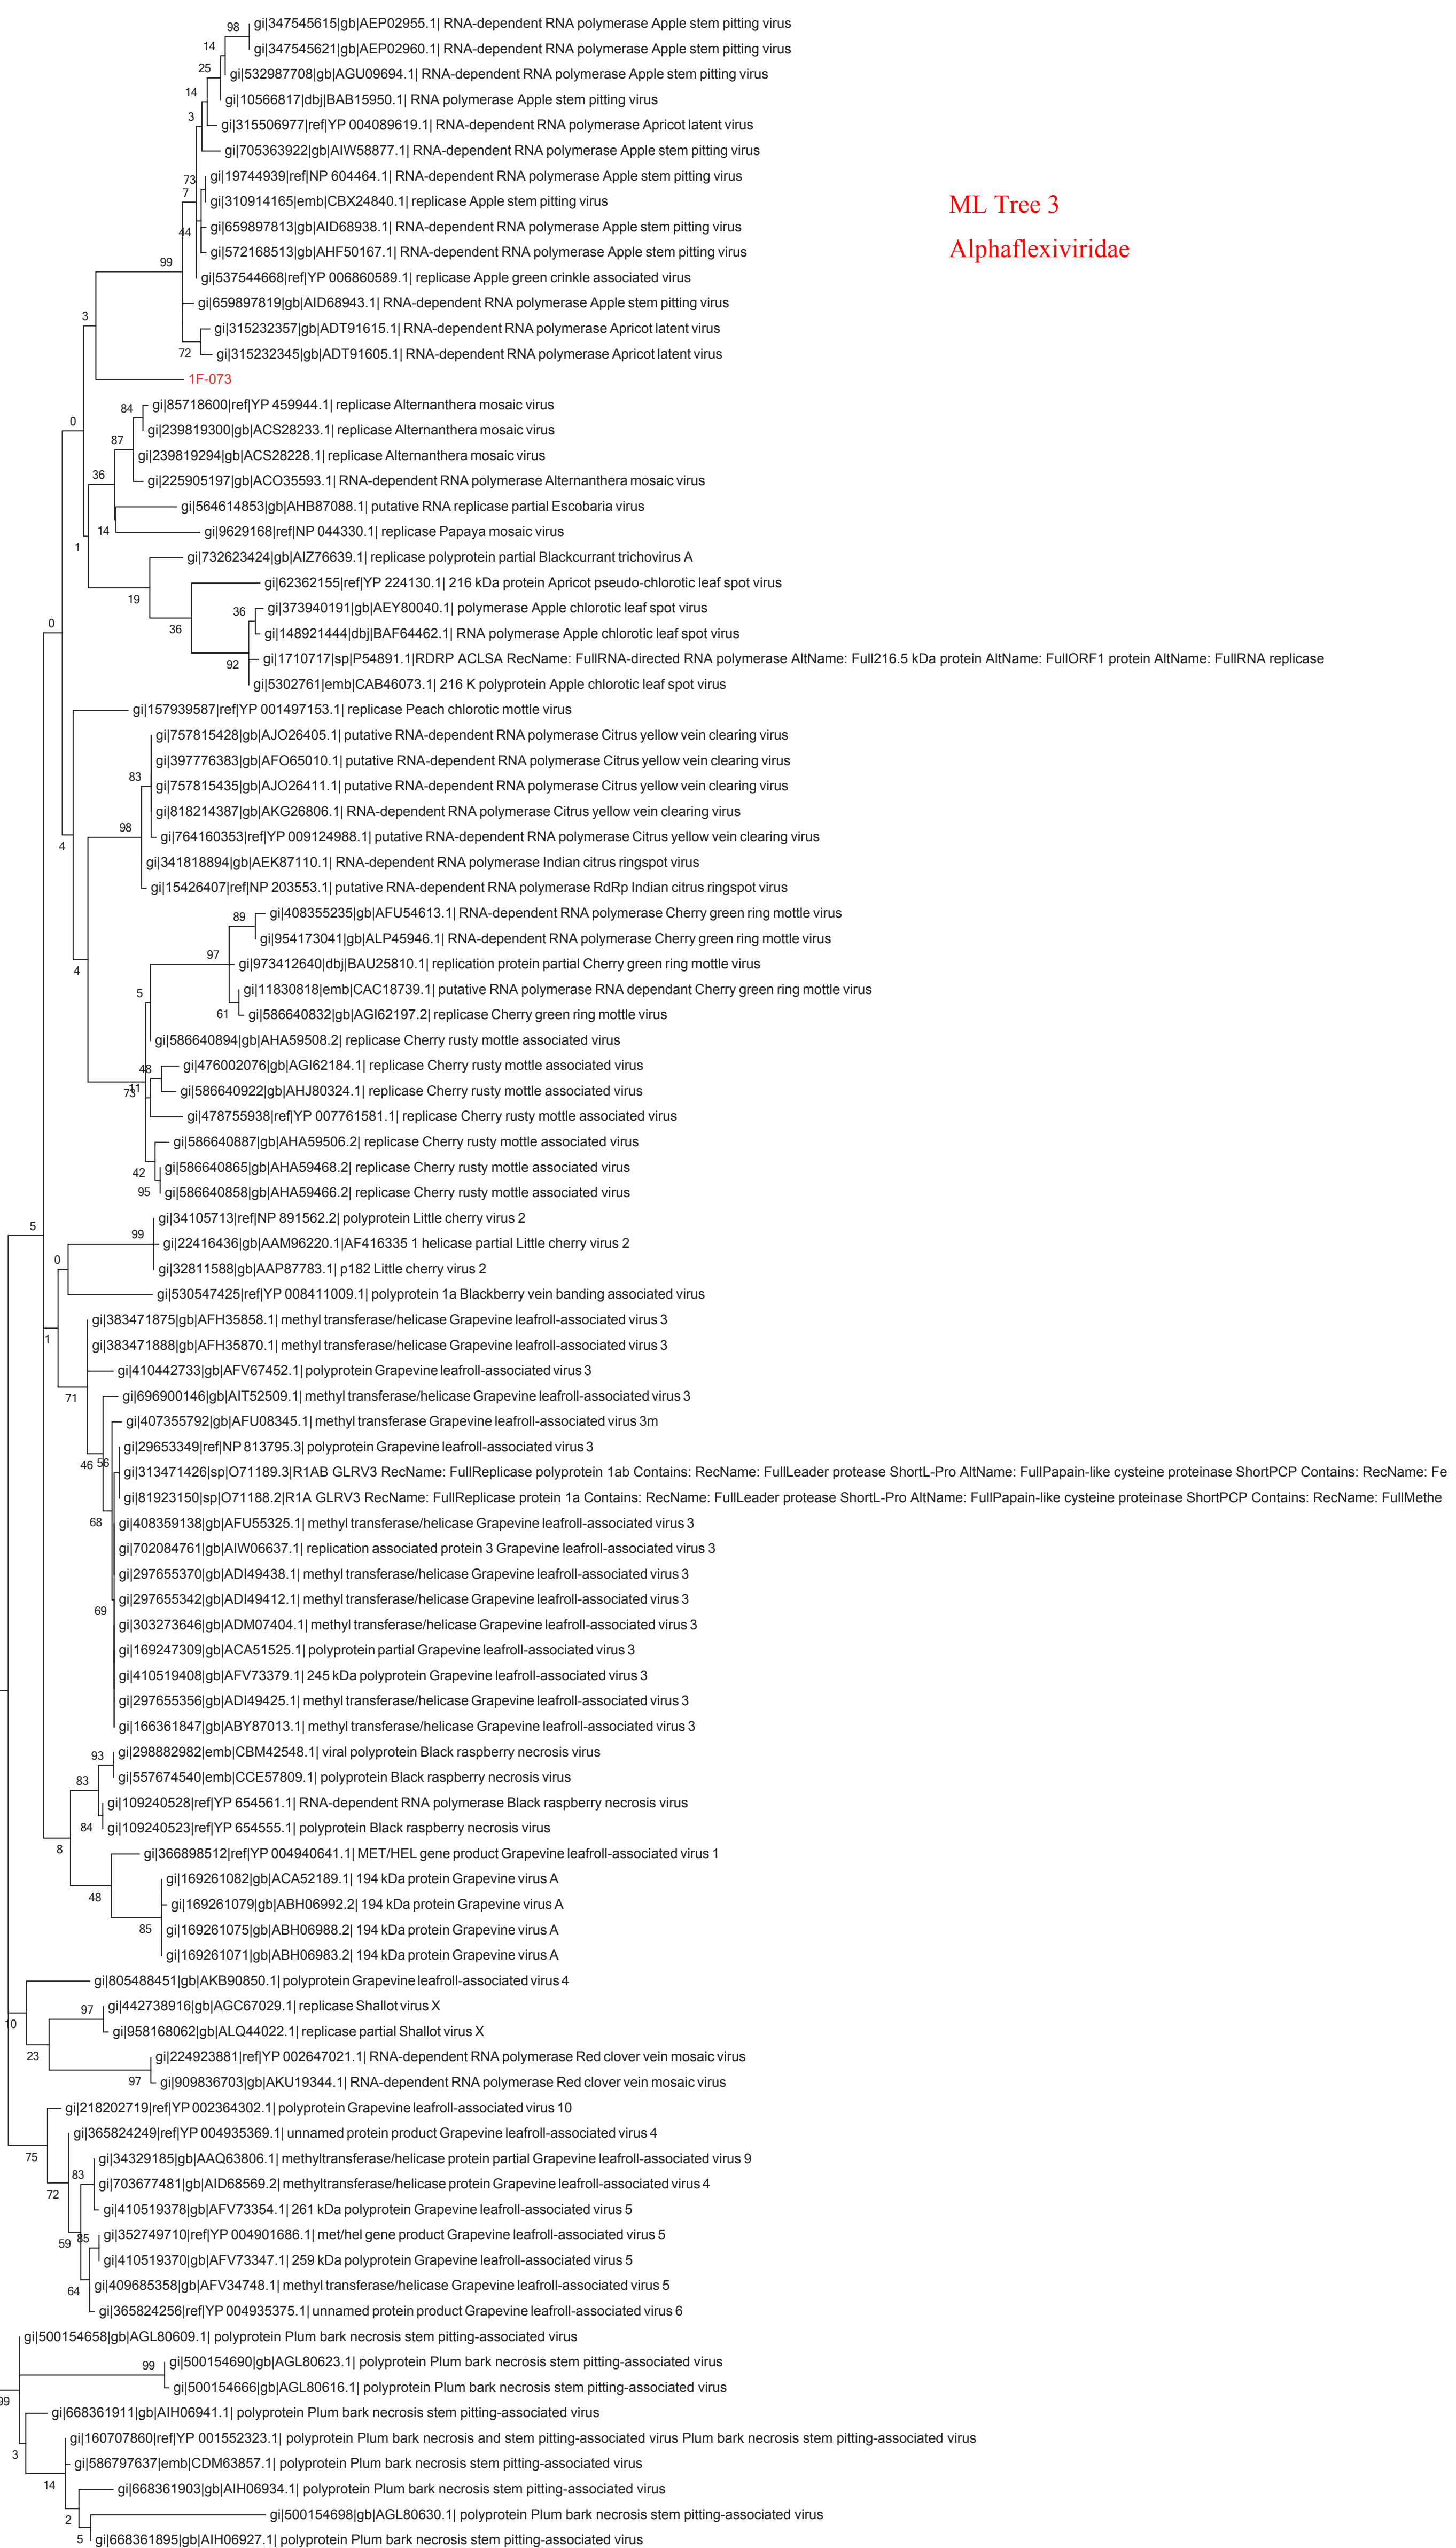

0.5

## ML Tree 4

## Alphaflexiviridae

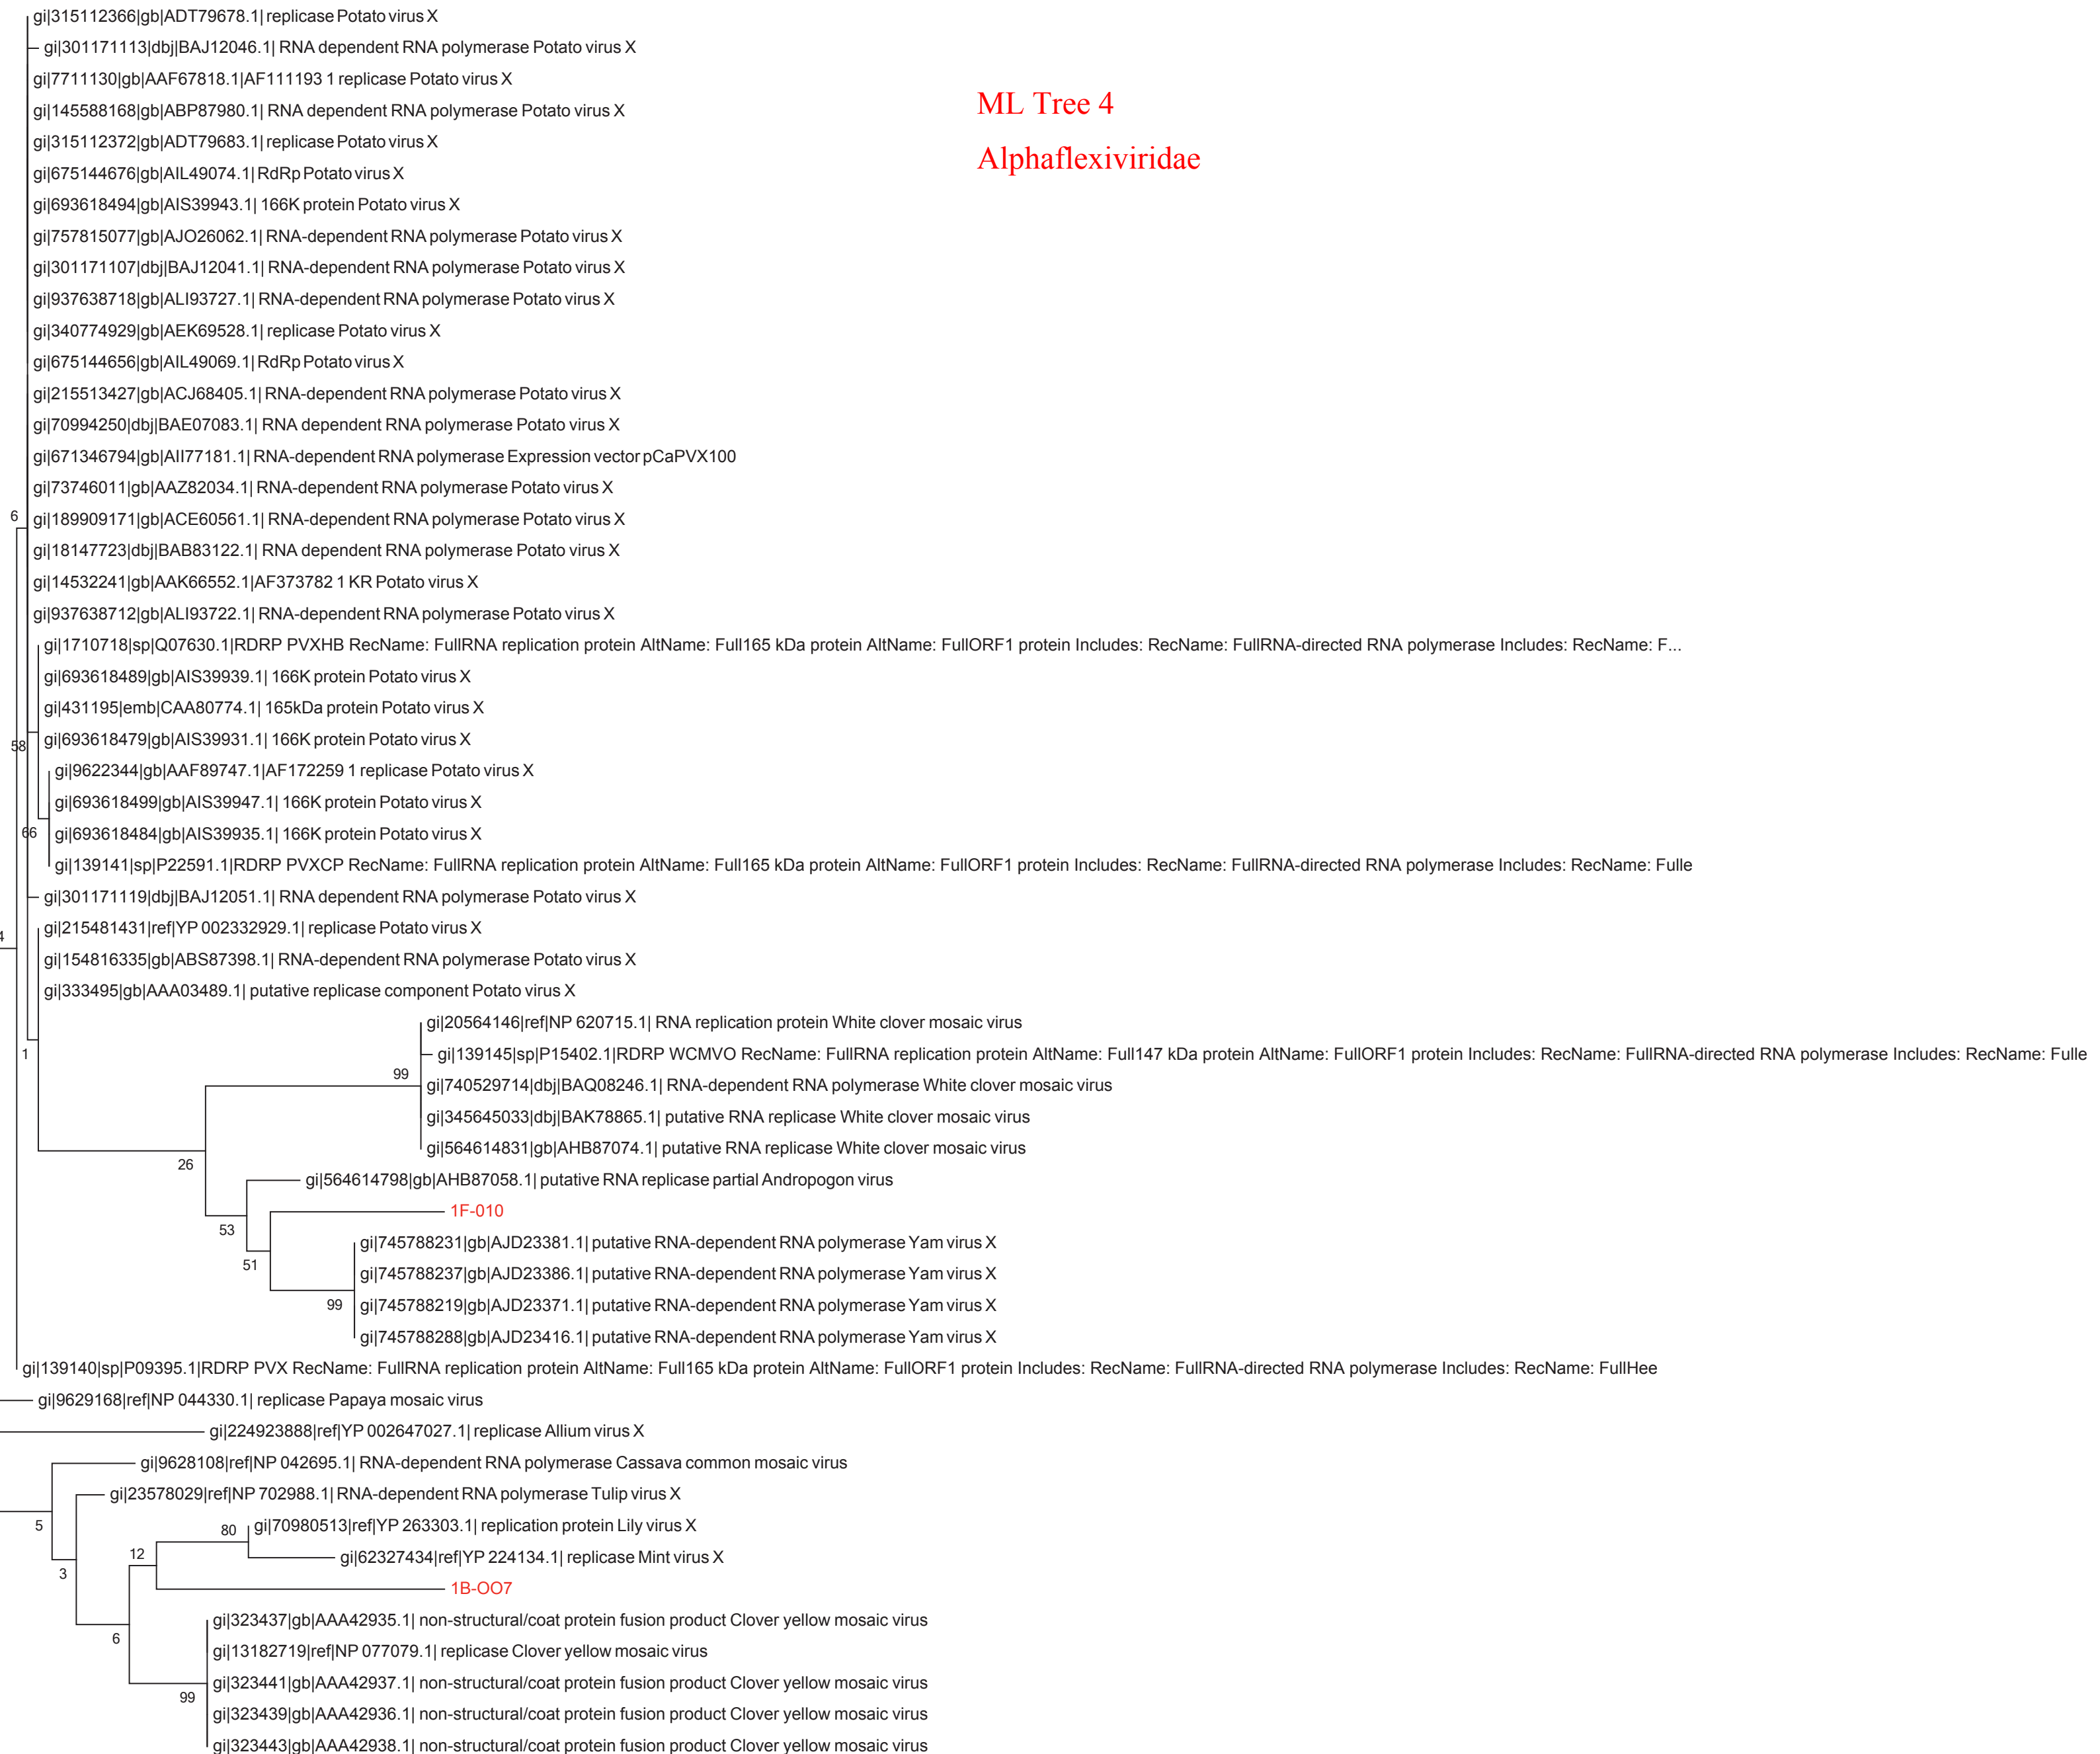

0.1



# ML Tree 5

## Alphaflexiviridae

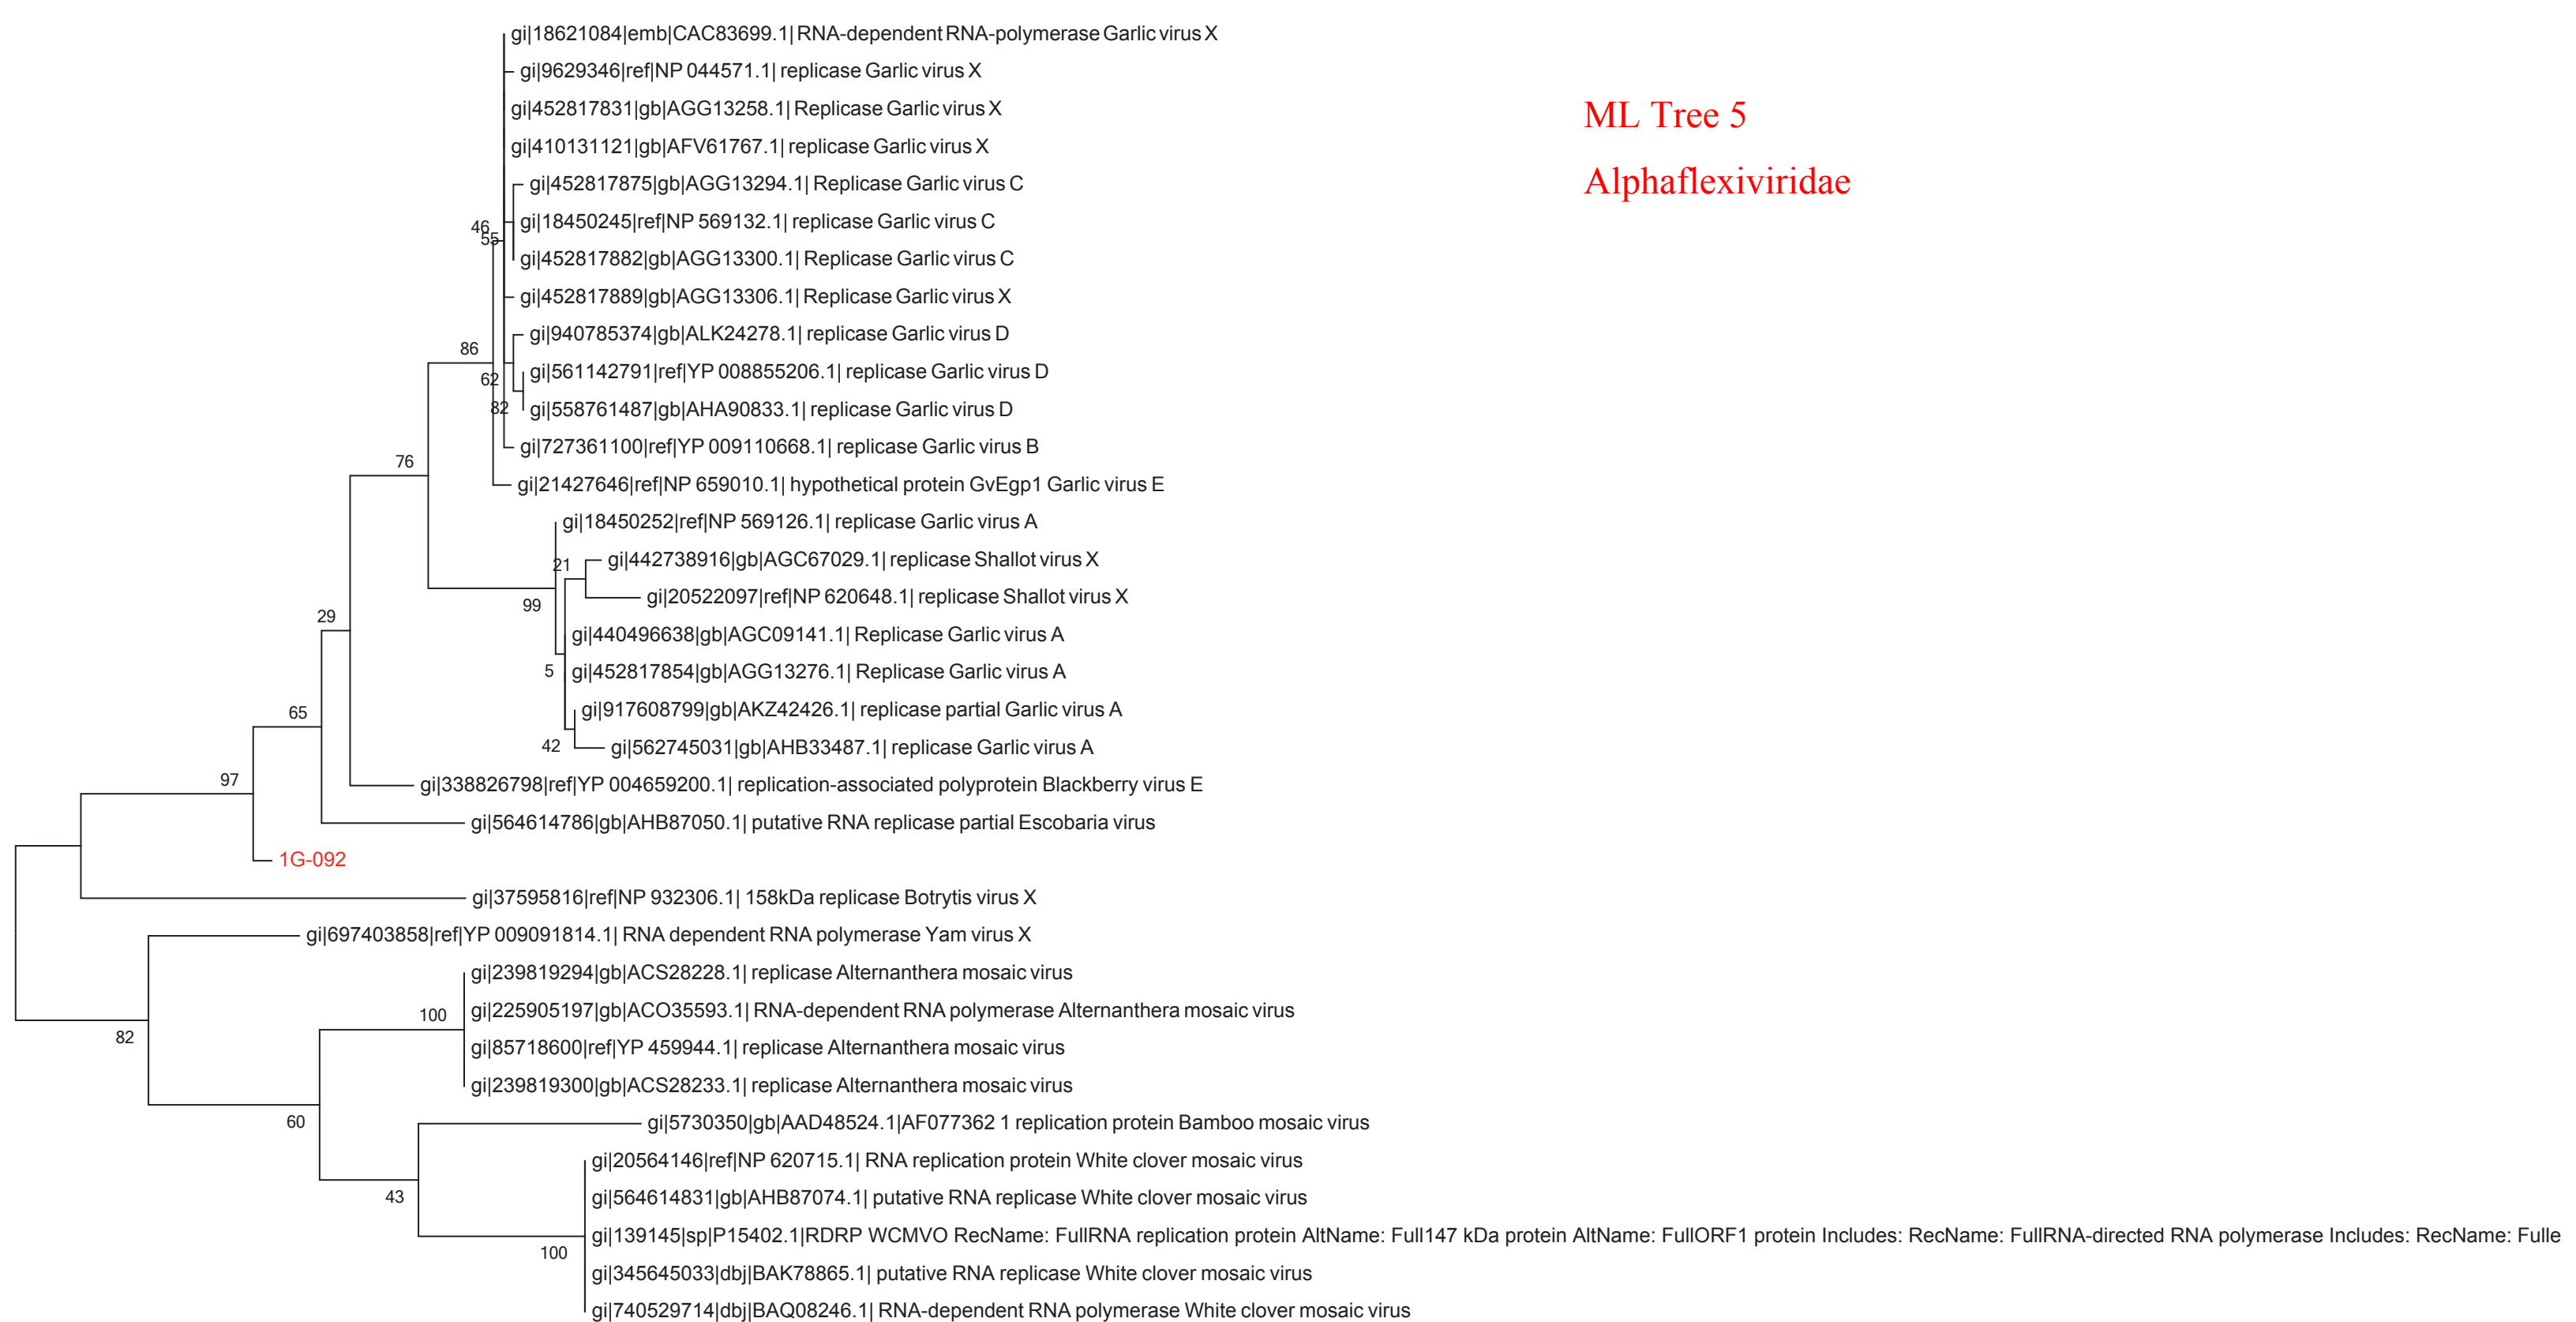

1G-092

0.2

# ML Tree 6

## Amalgaviridae

100  
gi|167077480|gb|ABZ10949.1| fusion protein Southern tomato virus  
gi|923057524|gb|ALB05811.1| fusion protein RdRp Southern tomato virus  
gi|948271133|gb|ALM54938.1| fusion protein RdRp Southern tomato virus  
gi|213496076|ref|YP\_002321509.1| fusion protein p122 Southern tomato virus  
gi|923057523|gb|ALB05810.1| putative coat protein Southern tomato virus  
gi|213496075|ref|YP\_002321510.1| putative coat protein p42 Southern tomato virus  
C2-2 A44 2012-89-E  
C2-2 A79 2012-99-D

100  
53-1D  
11-083

100  
gi|306478699|ref|YP\_003868437.1| putative coat protein Rhododendron virus A  
gi|306478698|ref|YP\_003868436.1| putative fusion protein Rhododendron virus A

0.2



# ML Tree 7

## Amalgaviridae

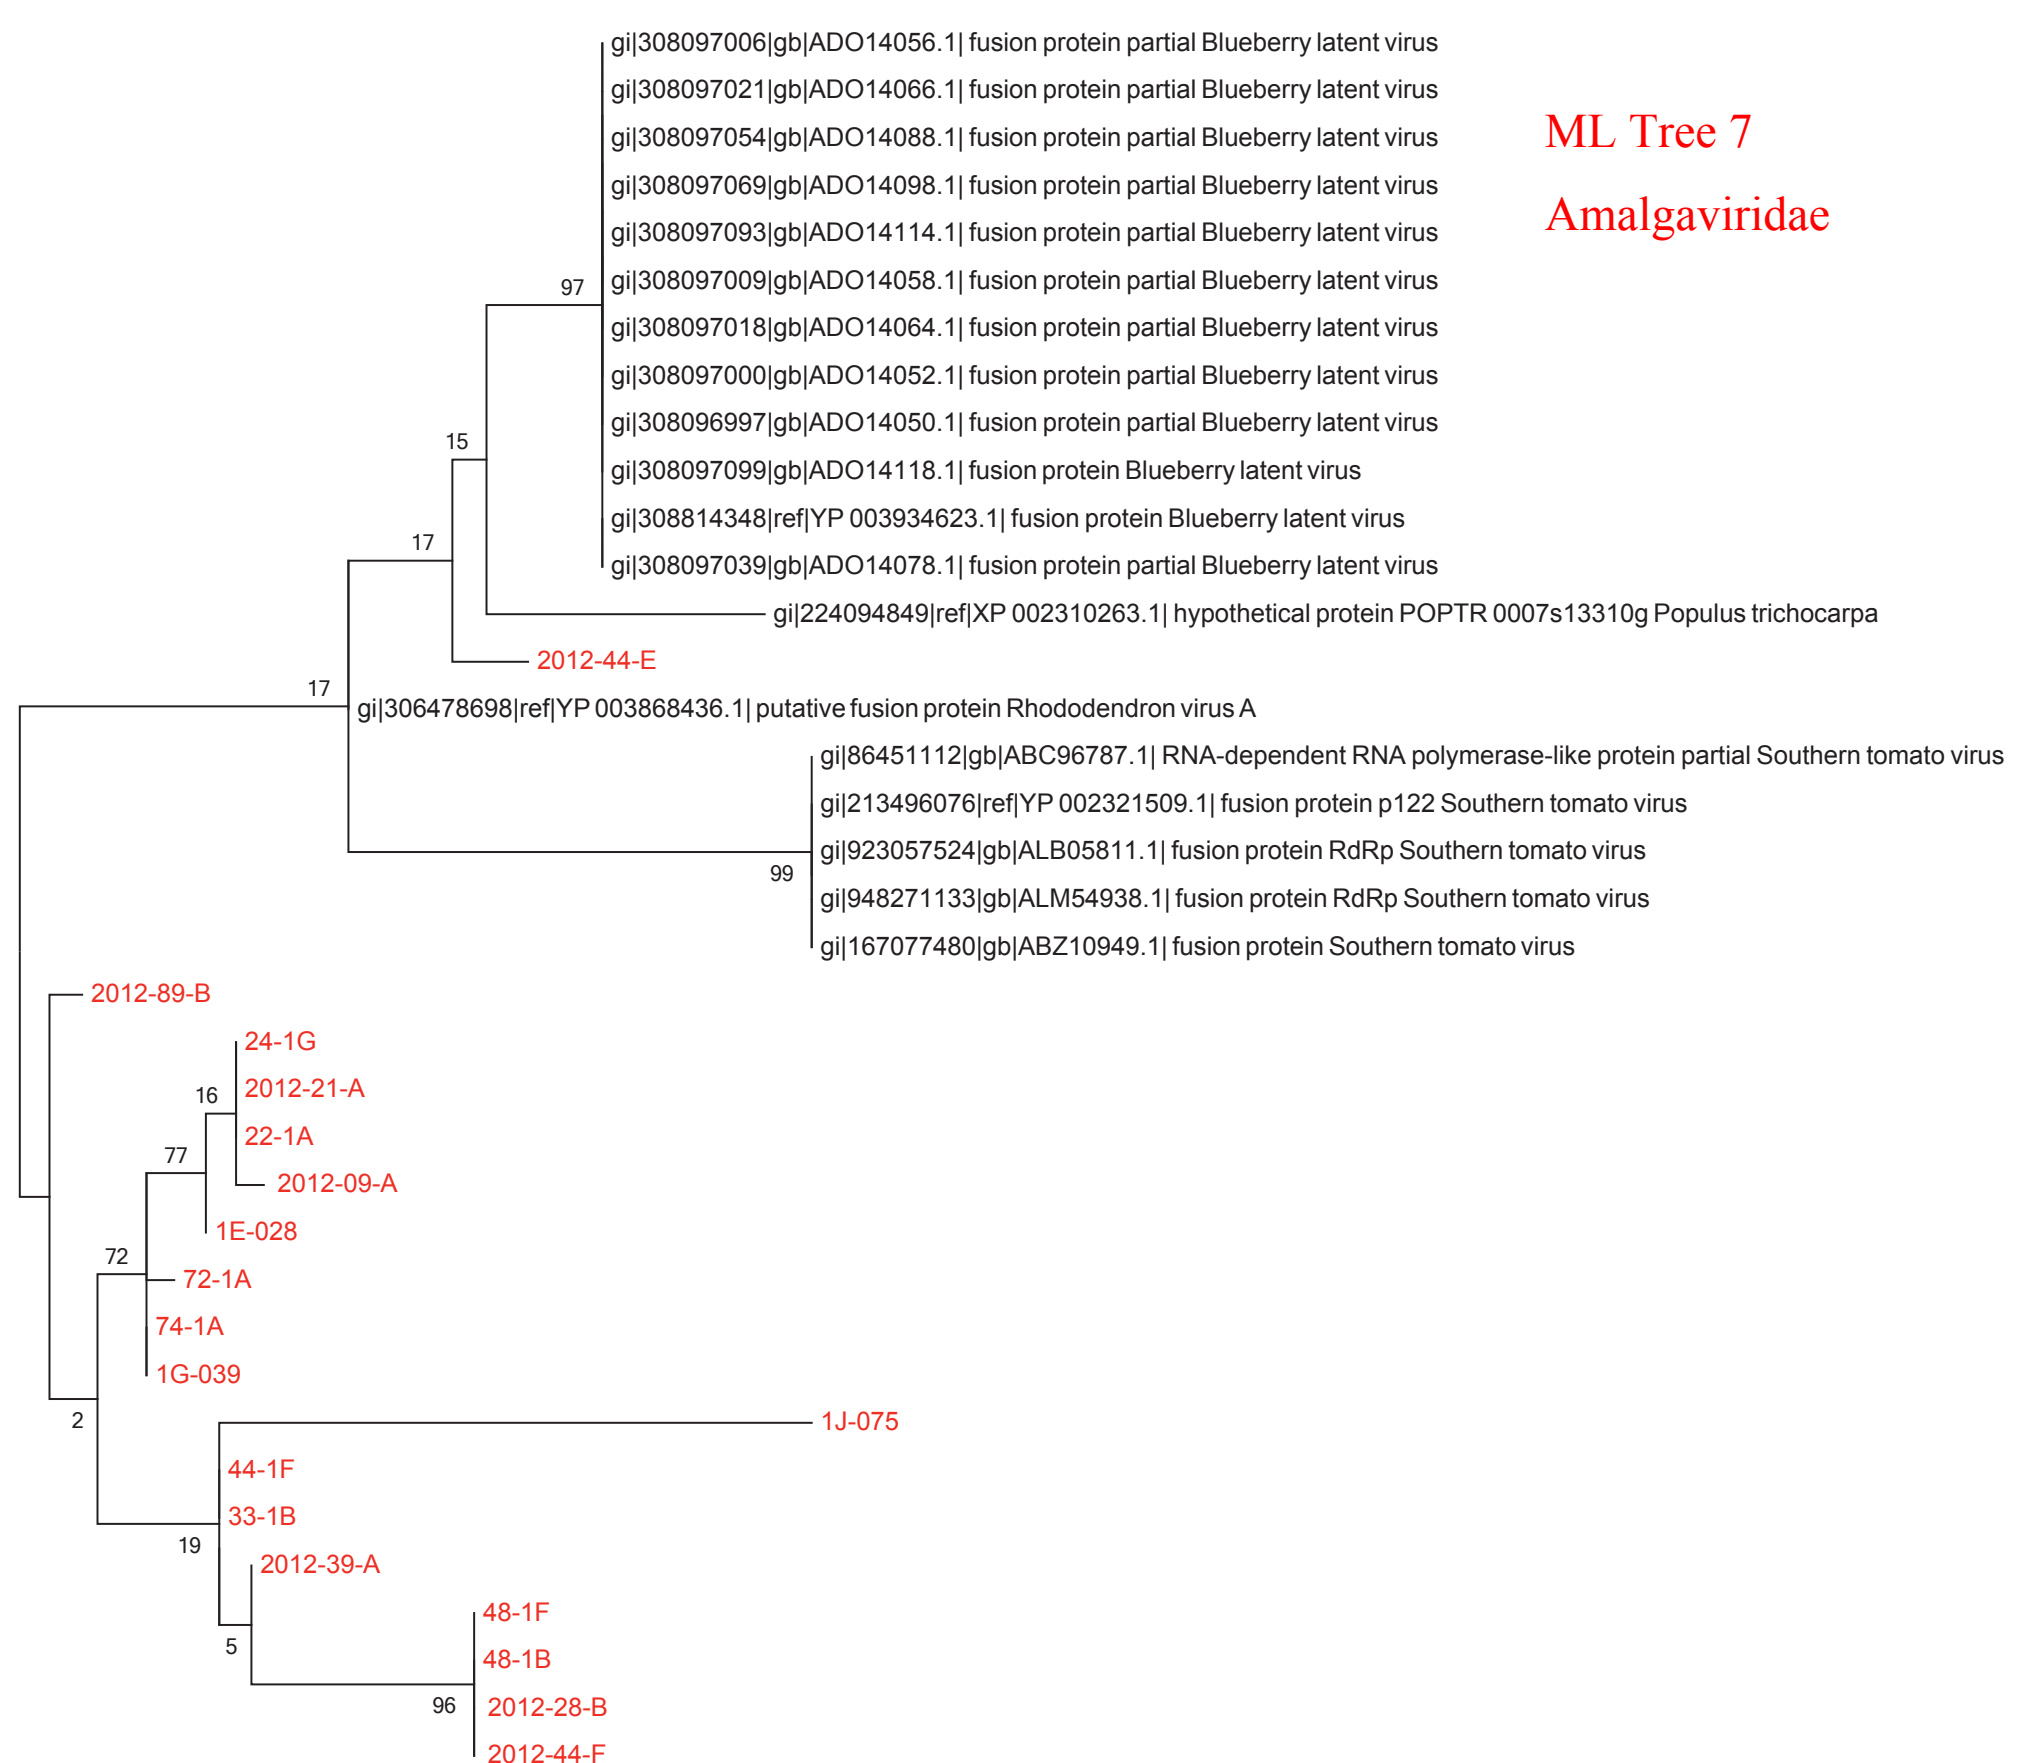

0.5

ML Tree 8  
Amalgaviridae

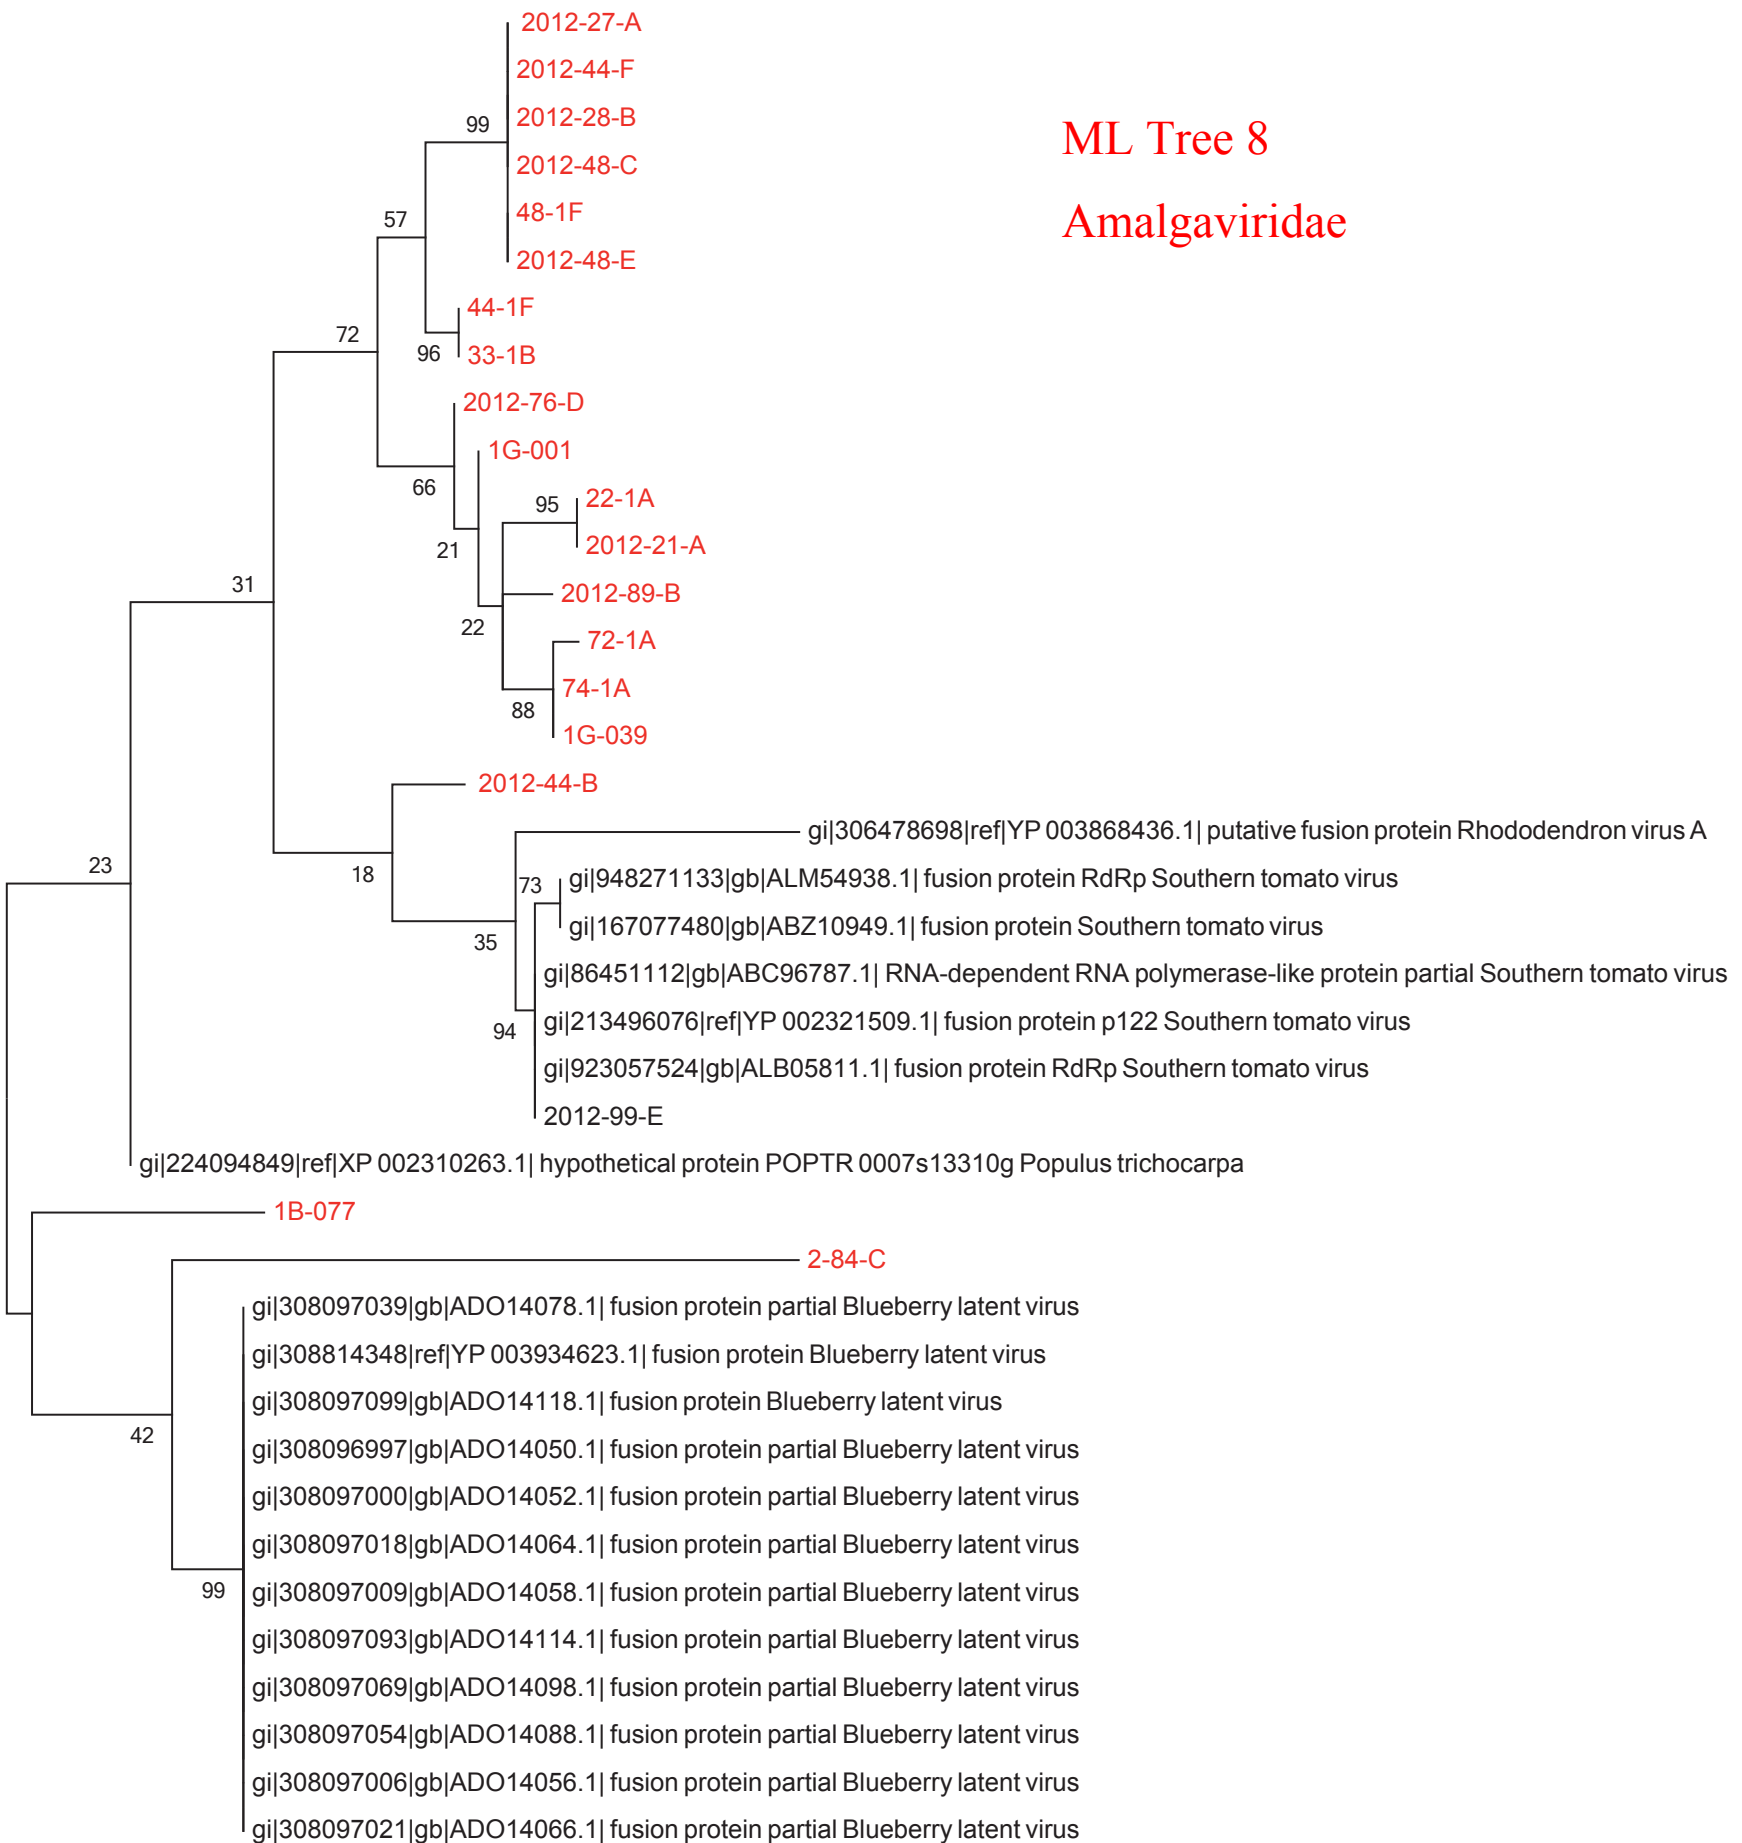

0.1



# ML Tree 9

## Amalgaviridae

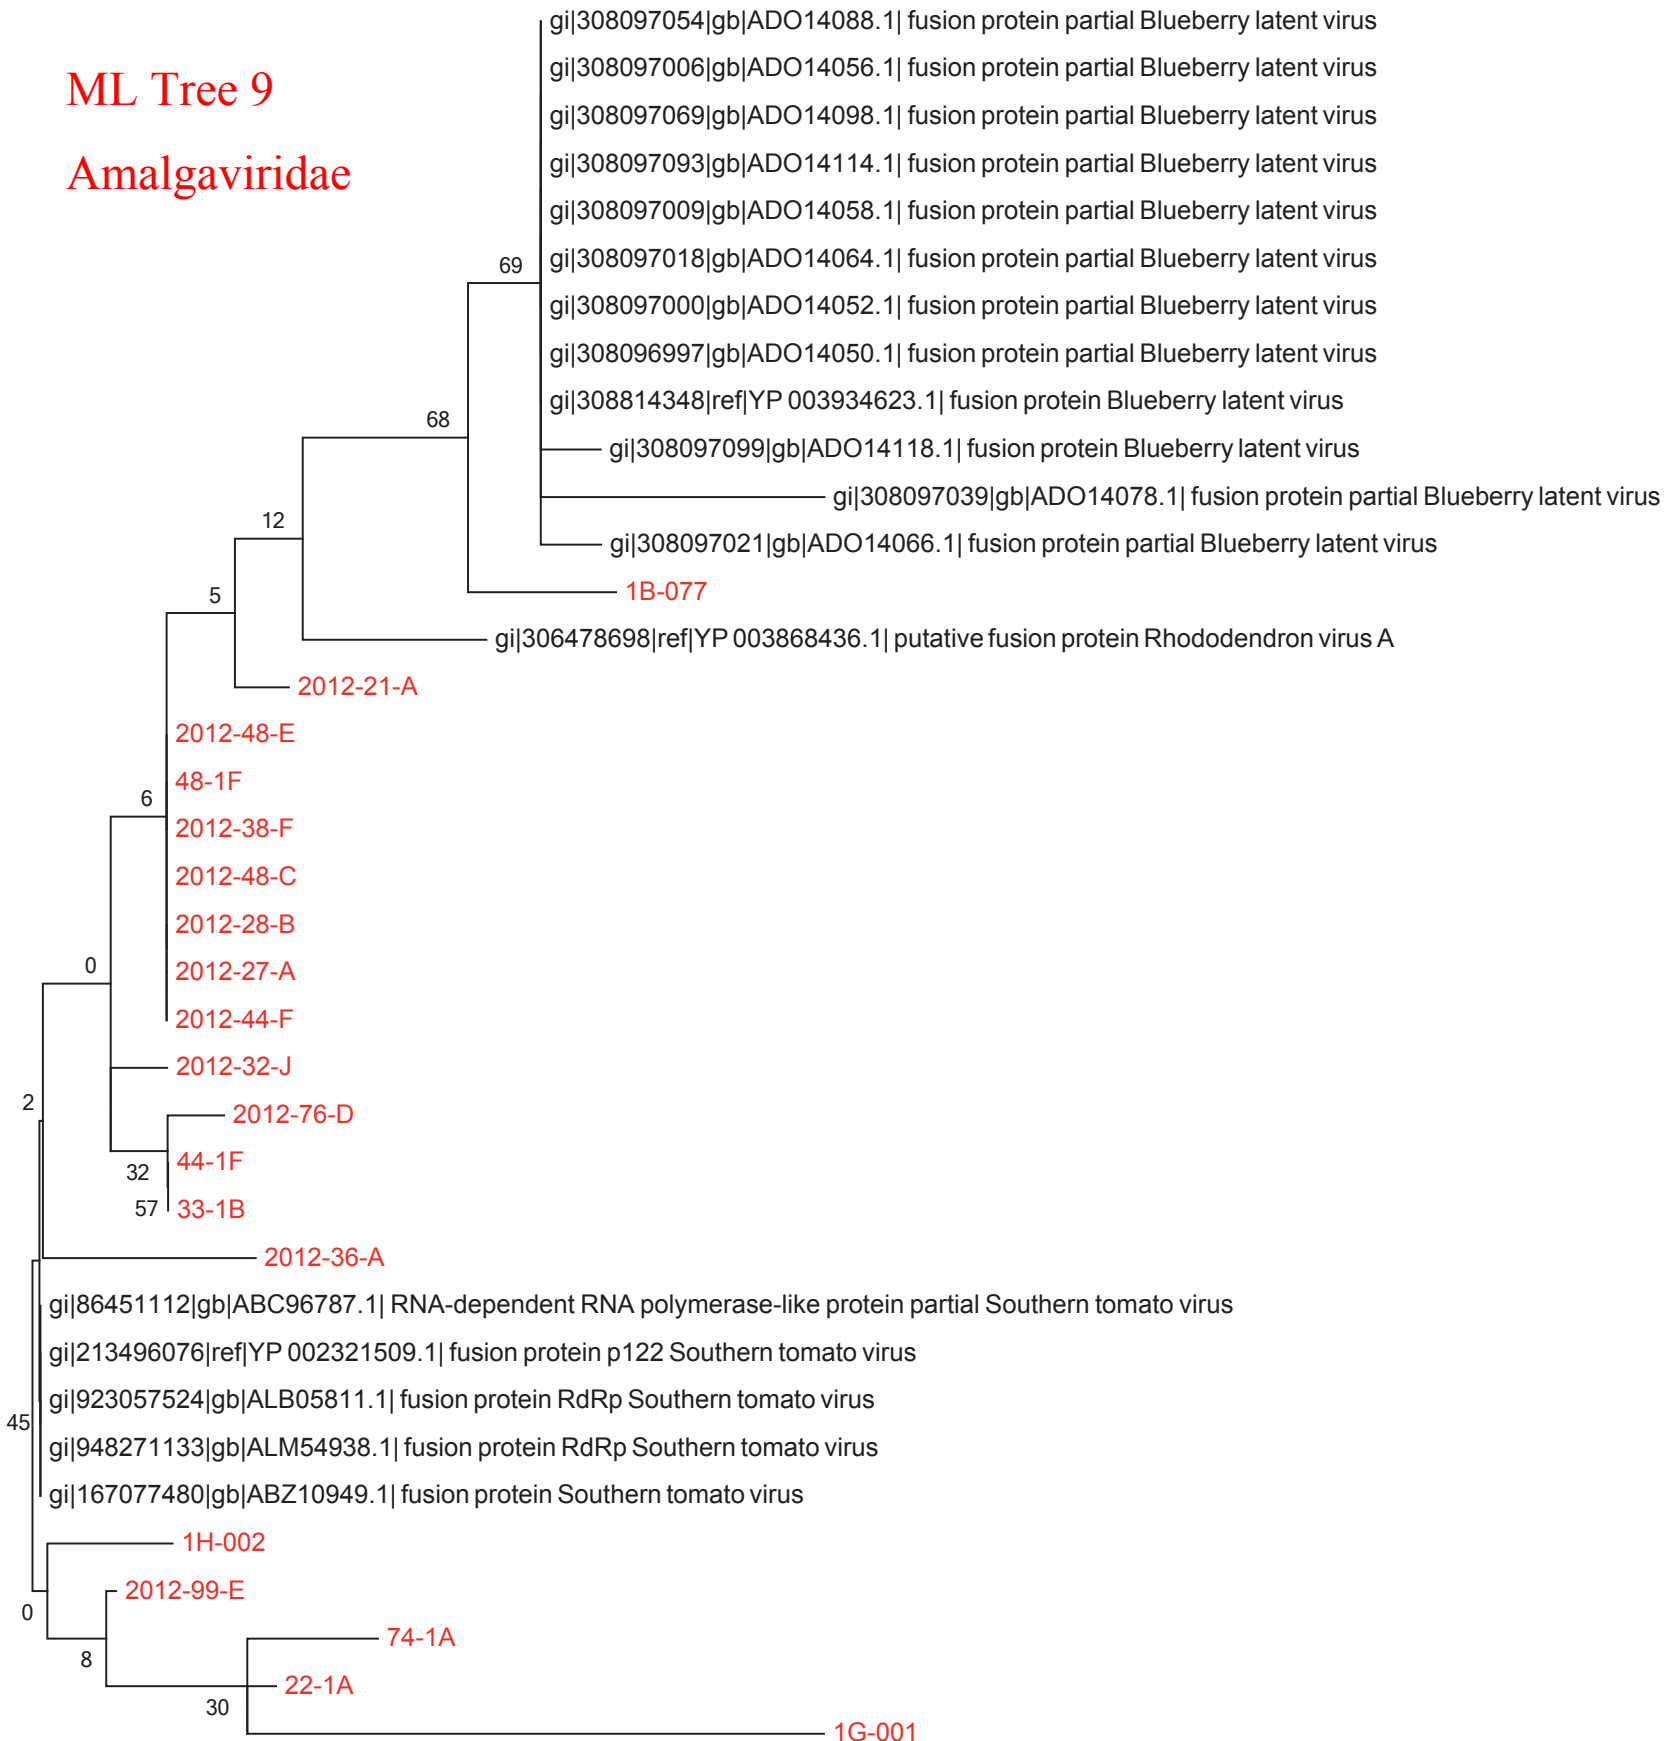

0.05

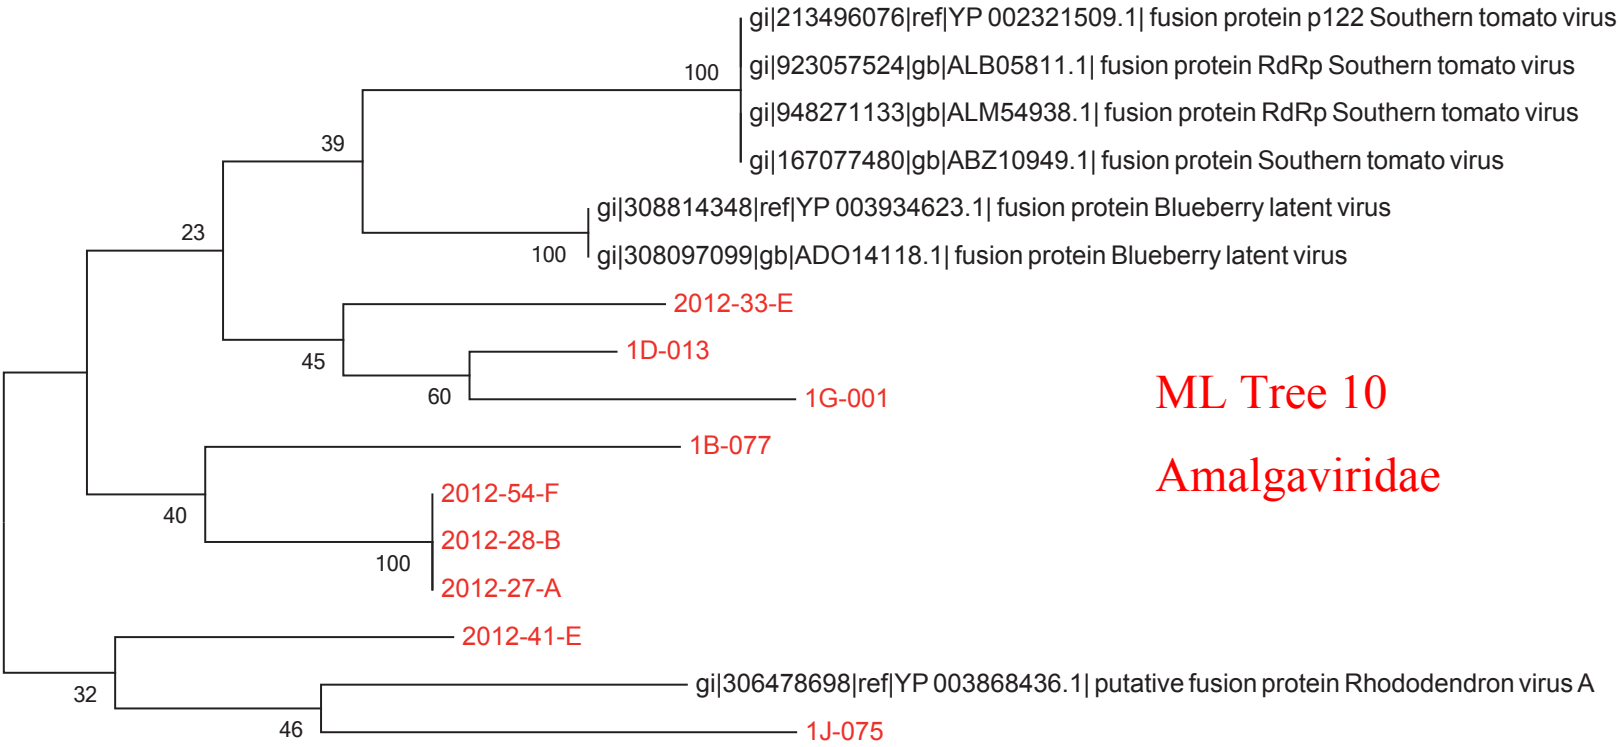

**ML Tree 10**  
**Amalgaviridae**

0.1



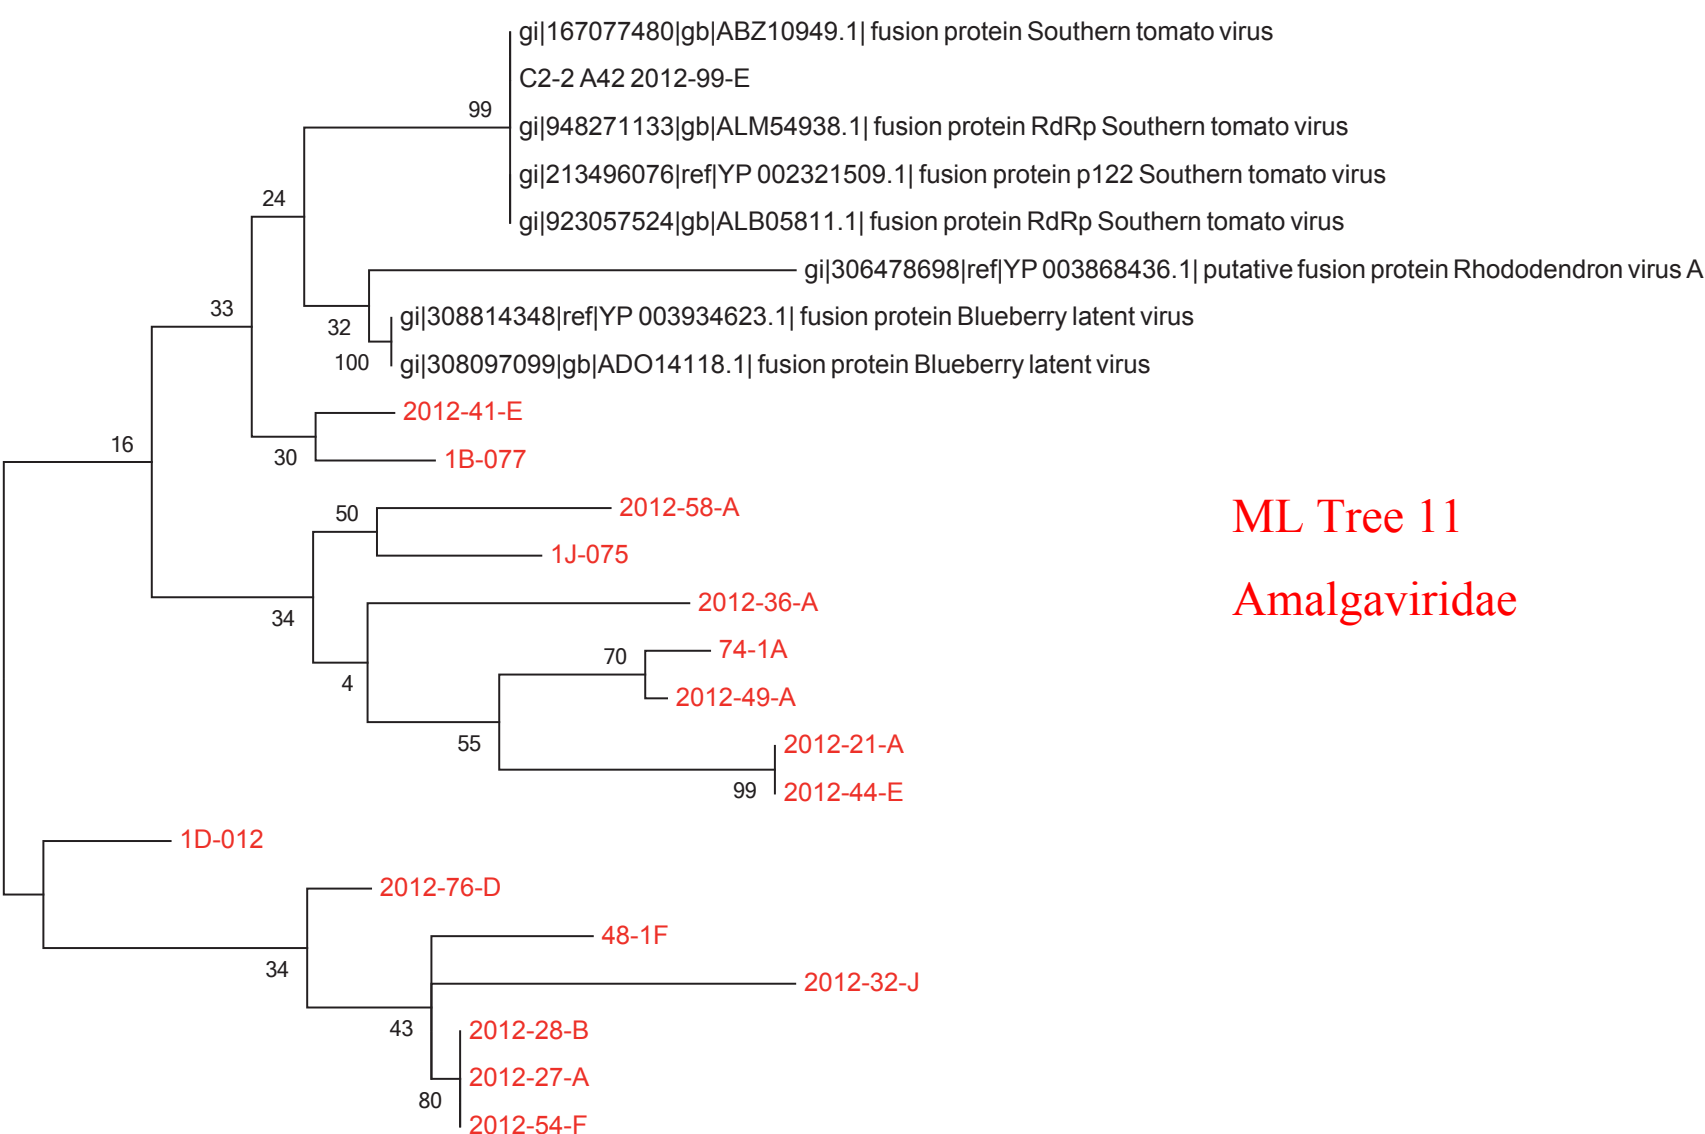

ML Tree 11  
Amalgaviridae

0.1

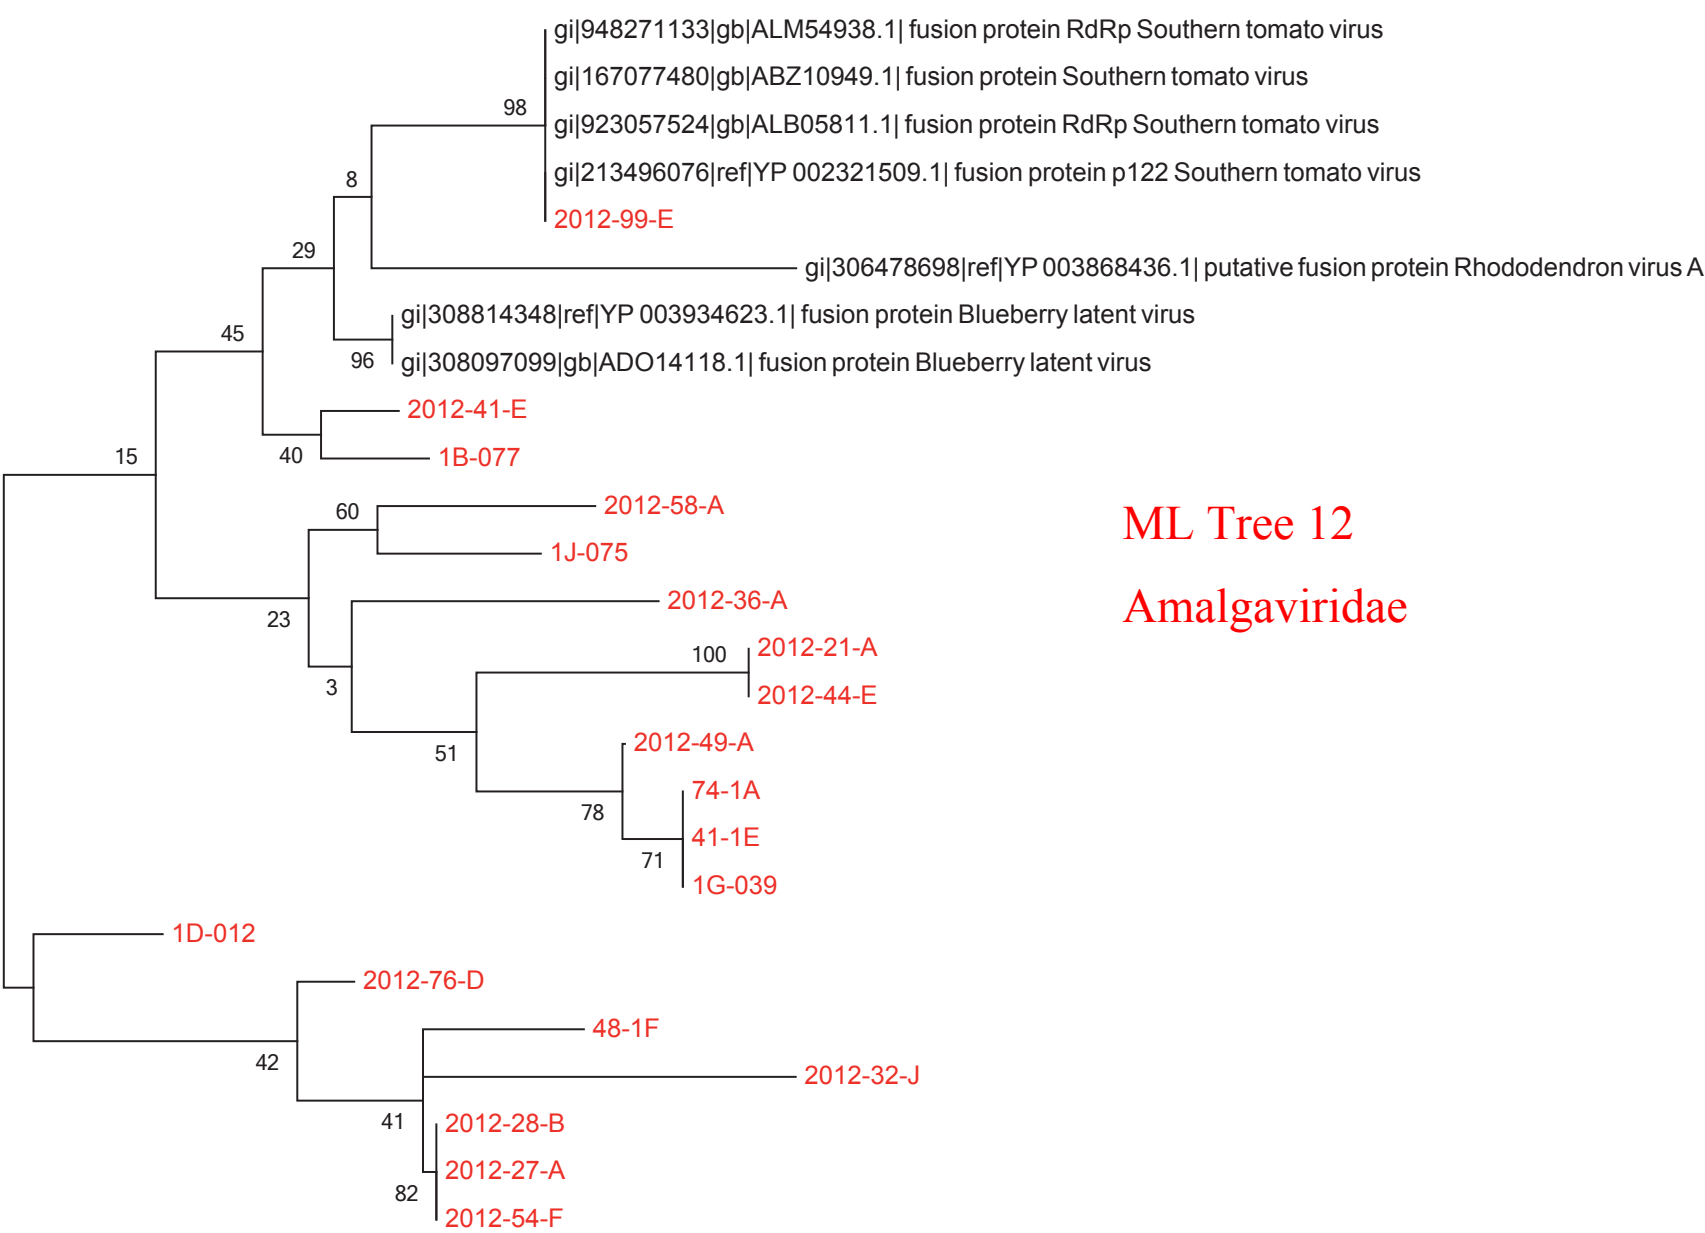

**ML Tree 12**  
**Amalgaviridae**

0.2



# ML Tree 13

## Amalgaviridae

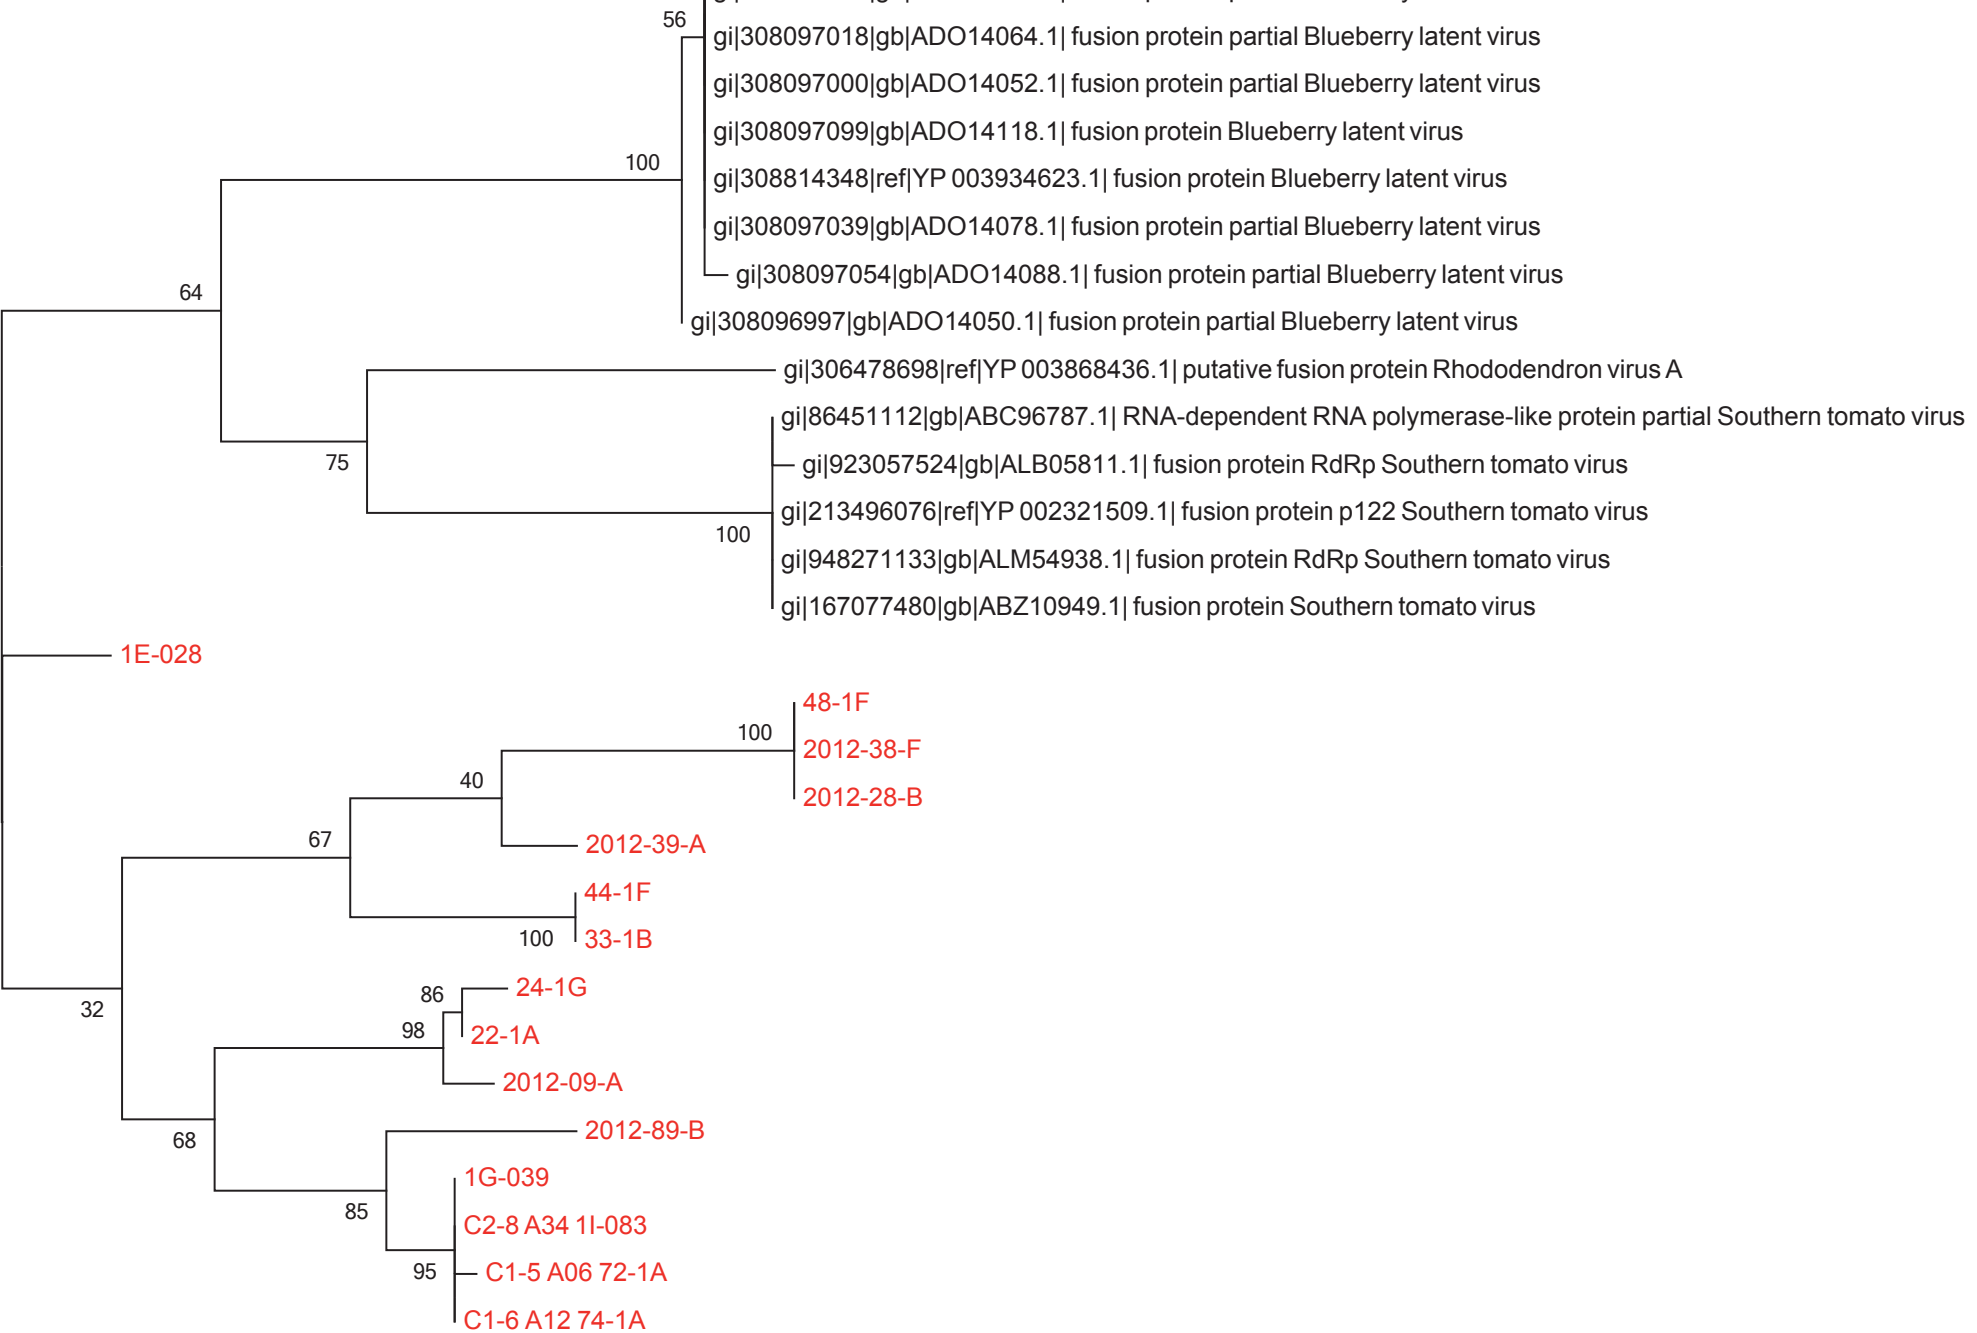

0.1

# ML Tree 14

## Amalgaviridae

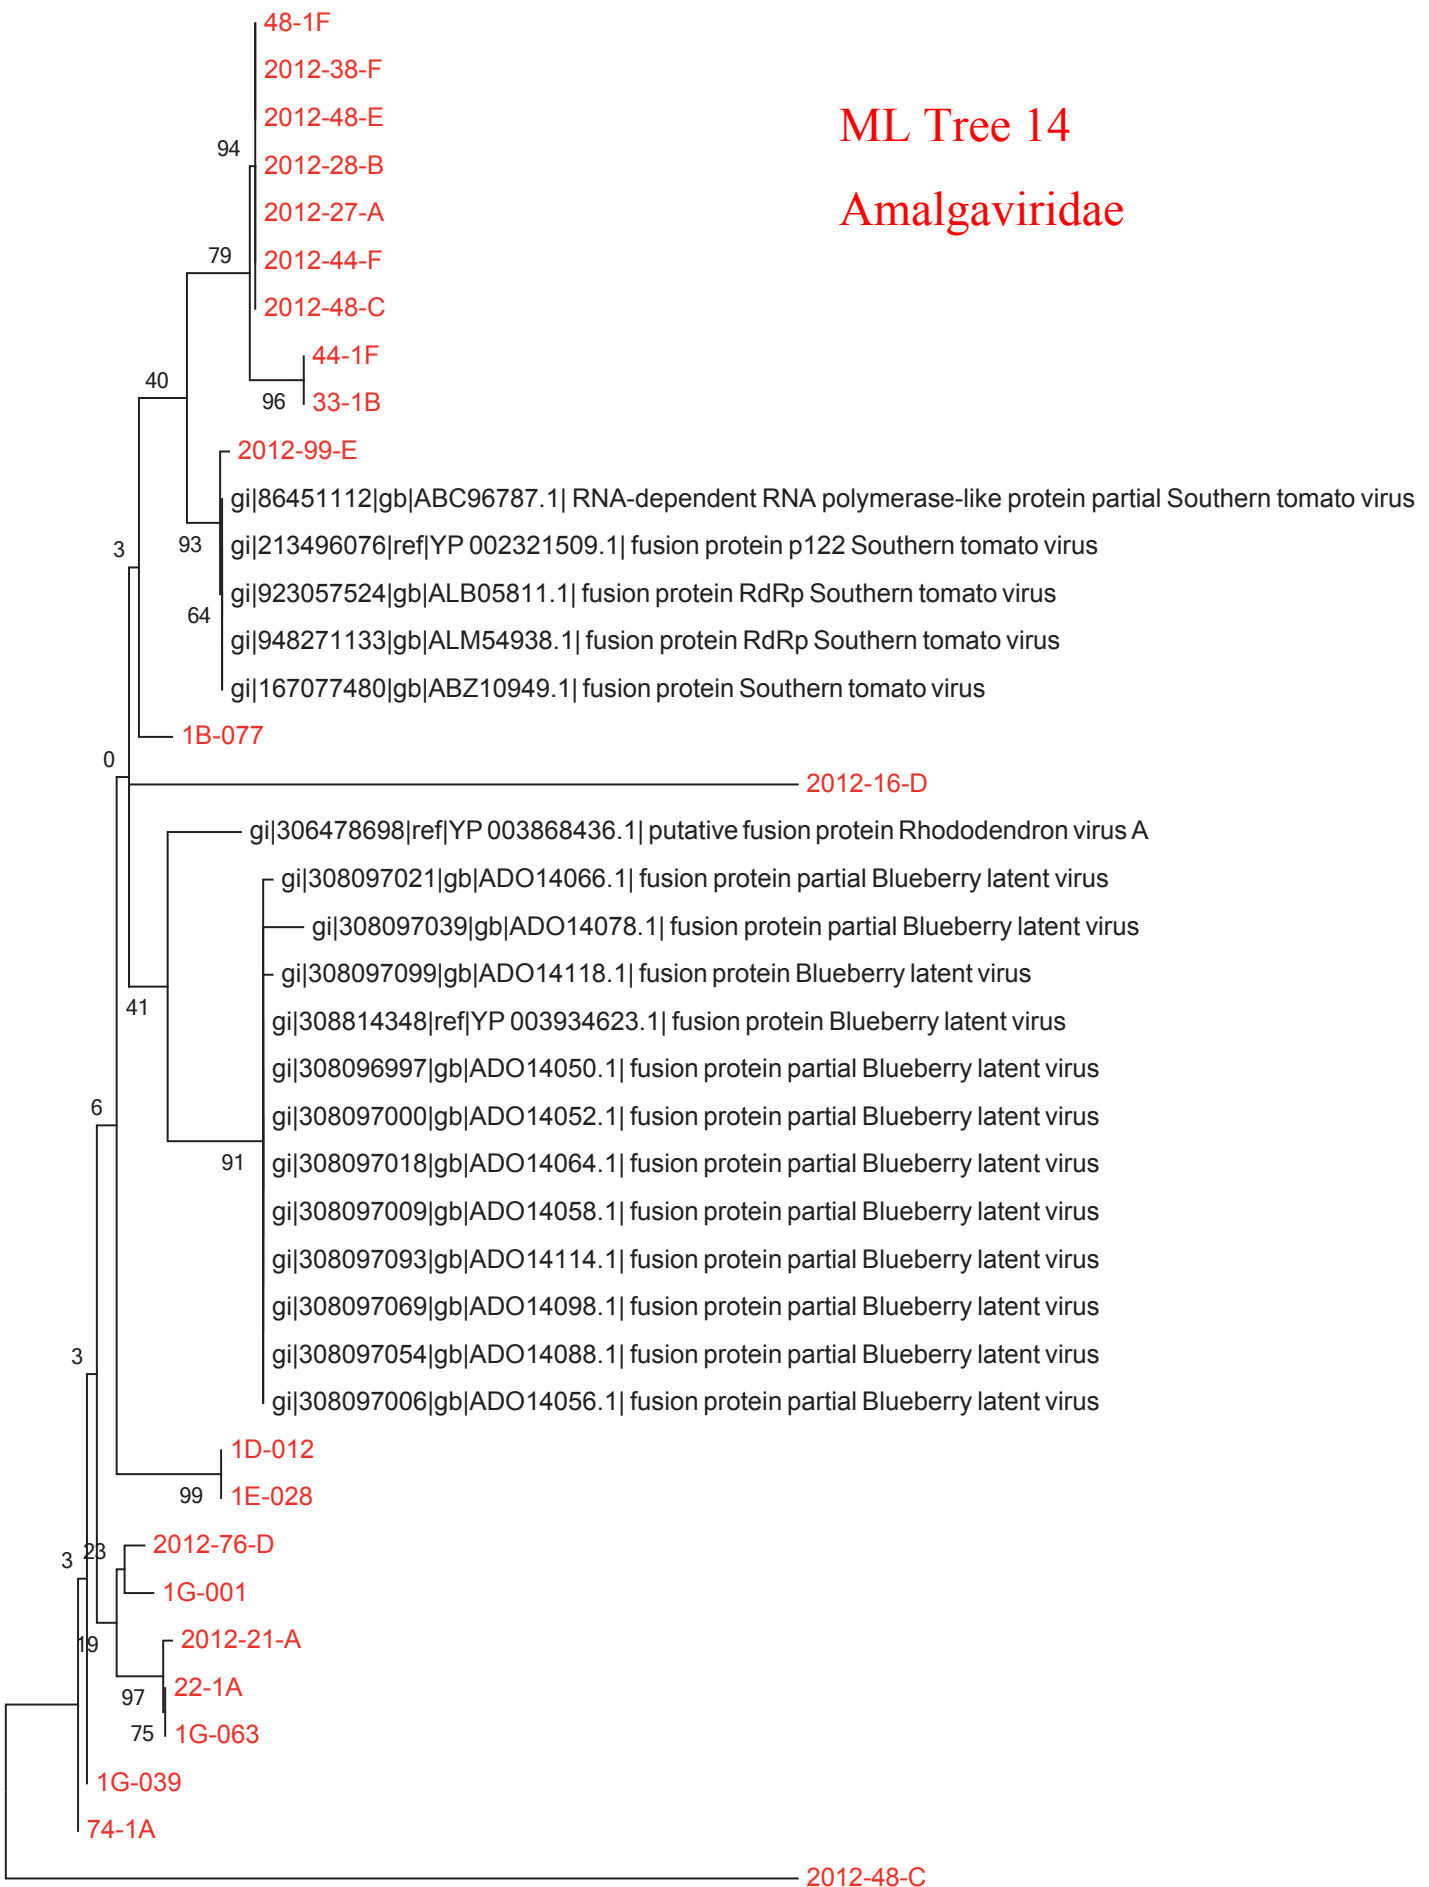

0.5

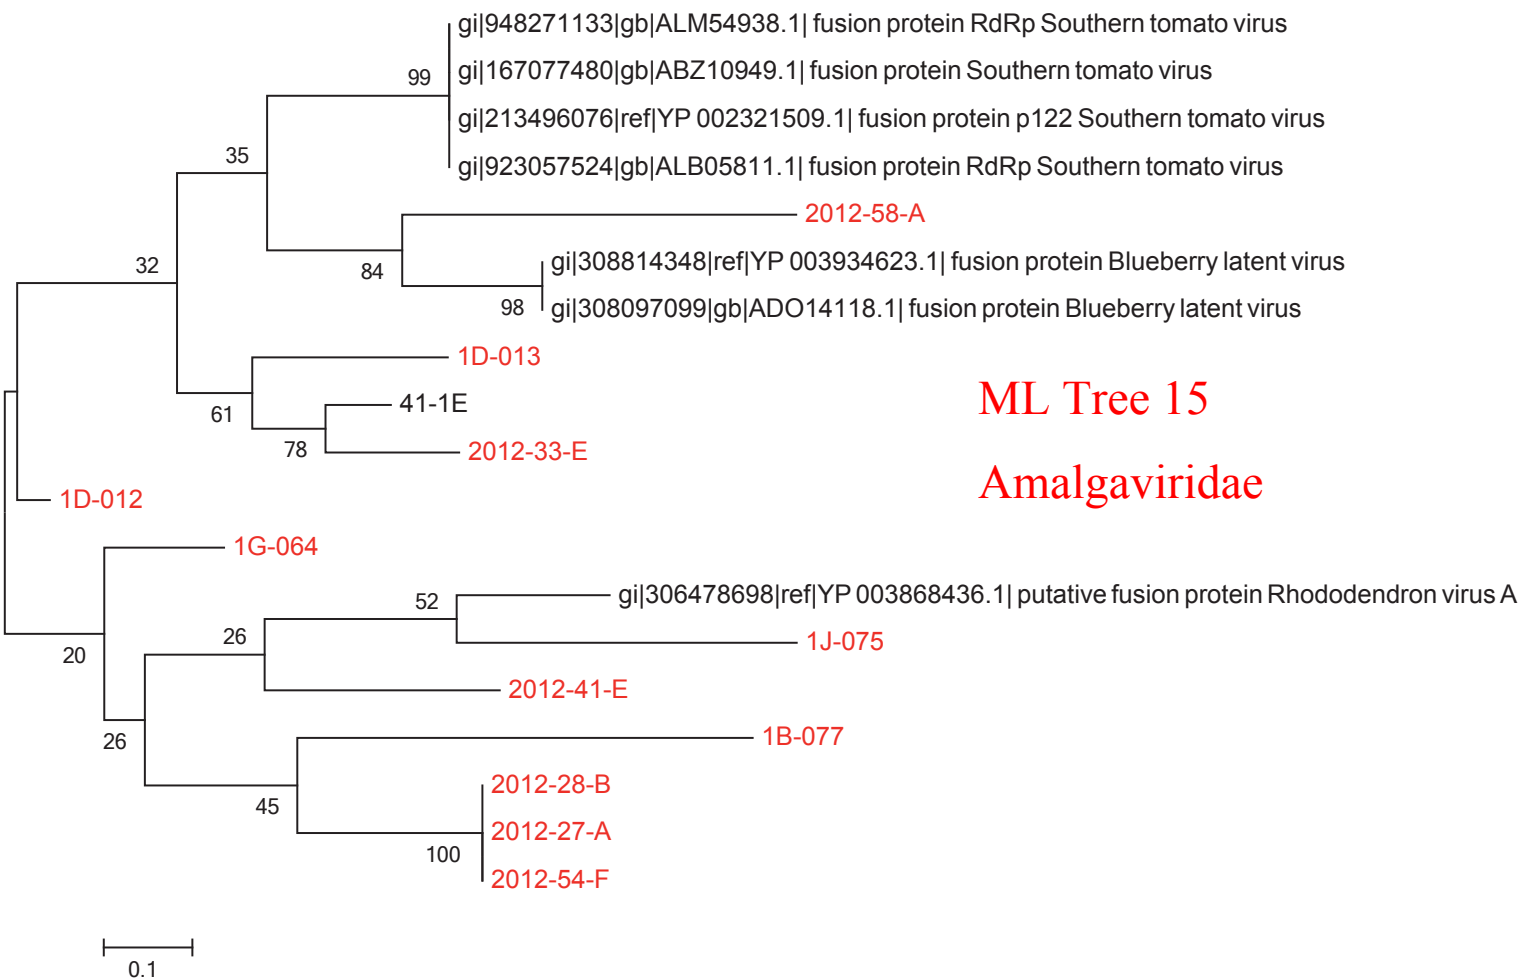



# ML Tree 16

## Benyviridae

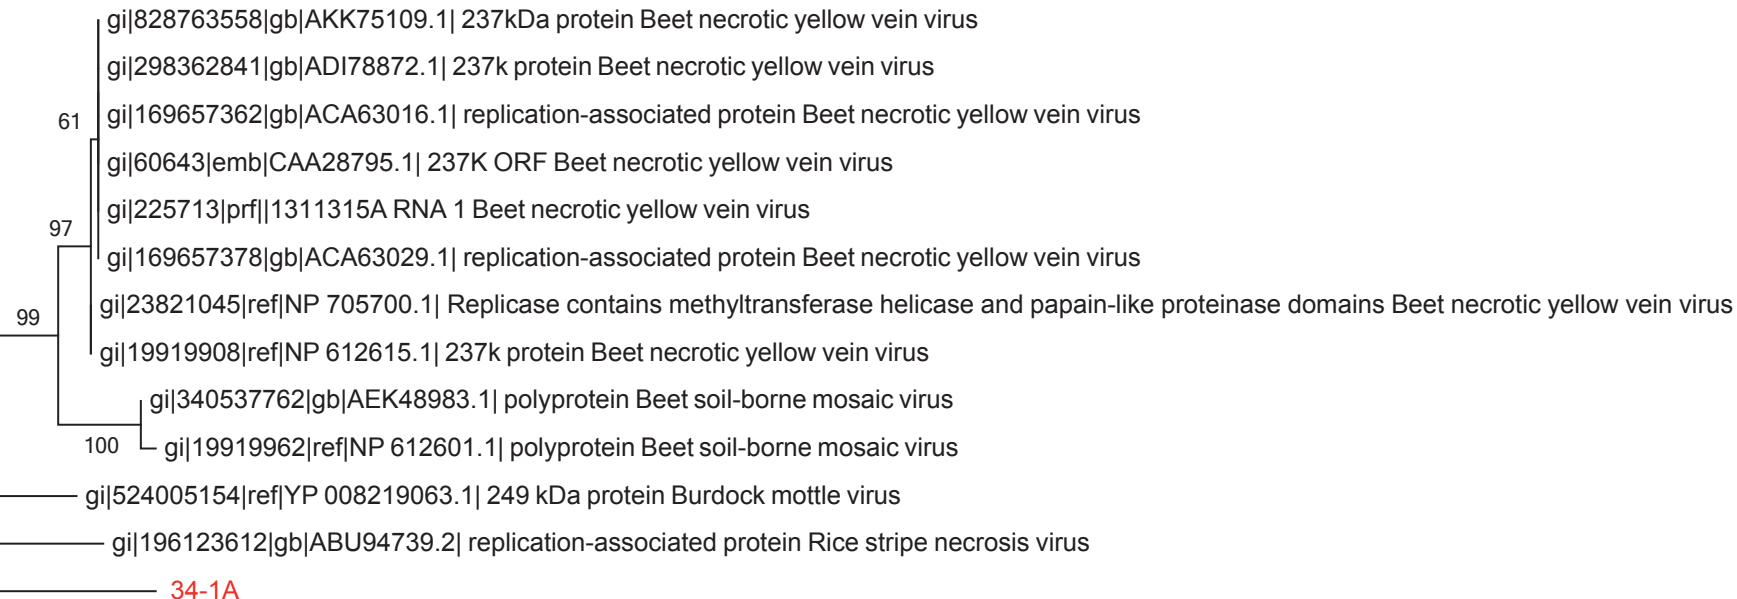

0.1

ML Tree 17  
Betaflexiviridae

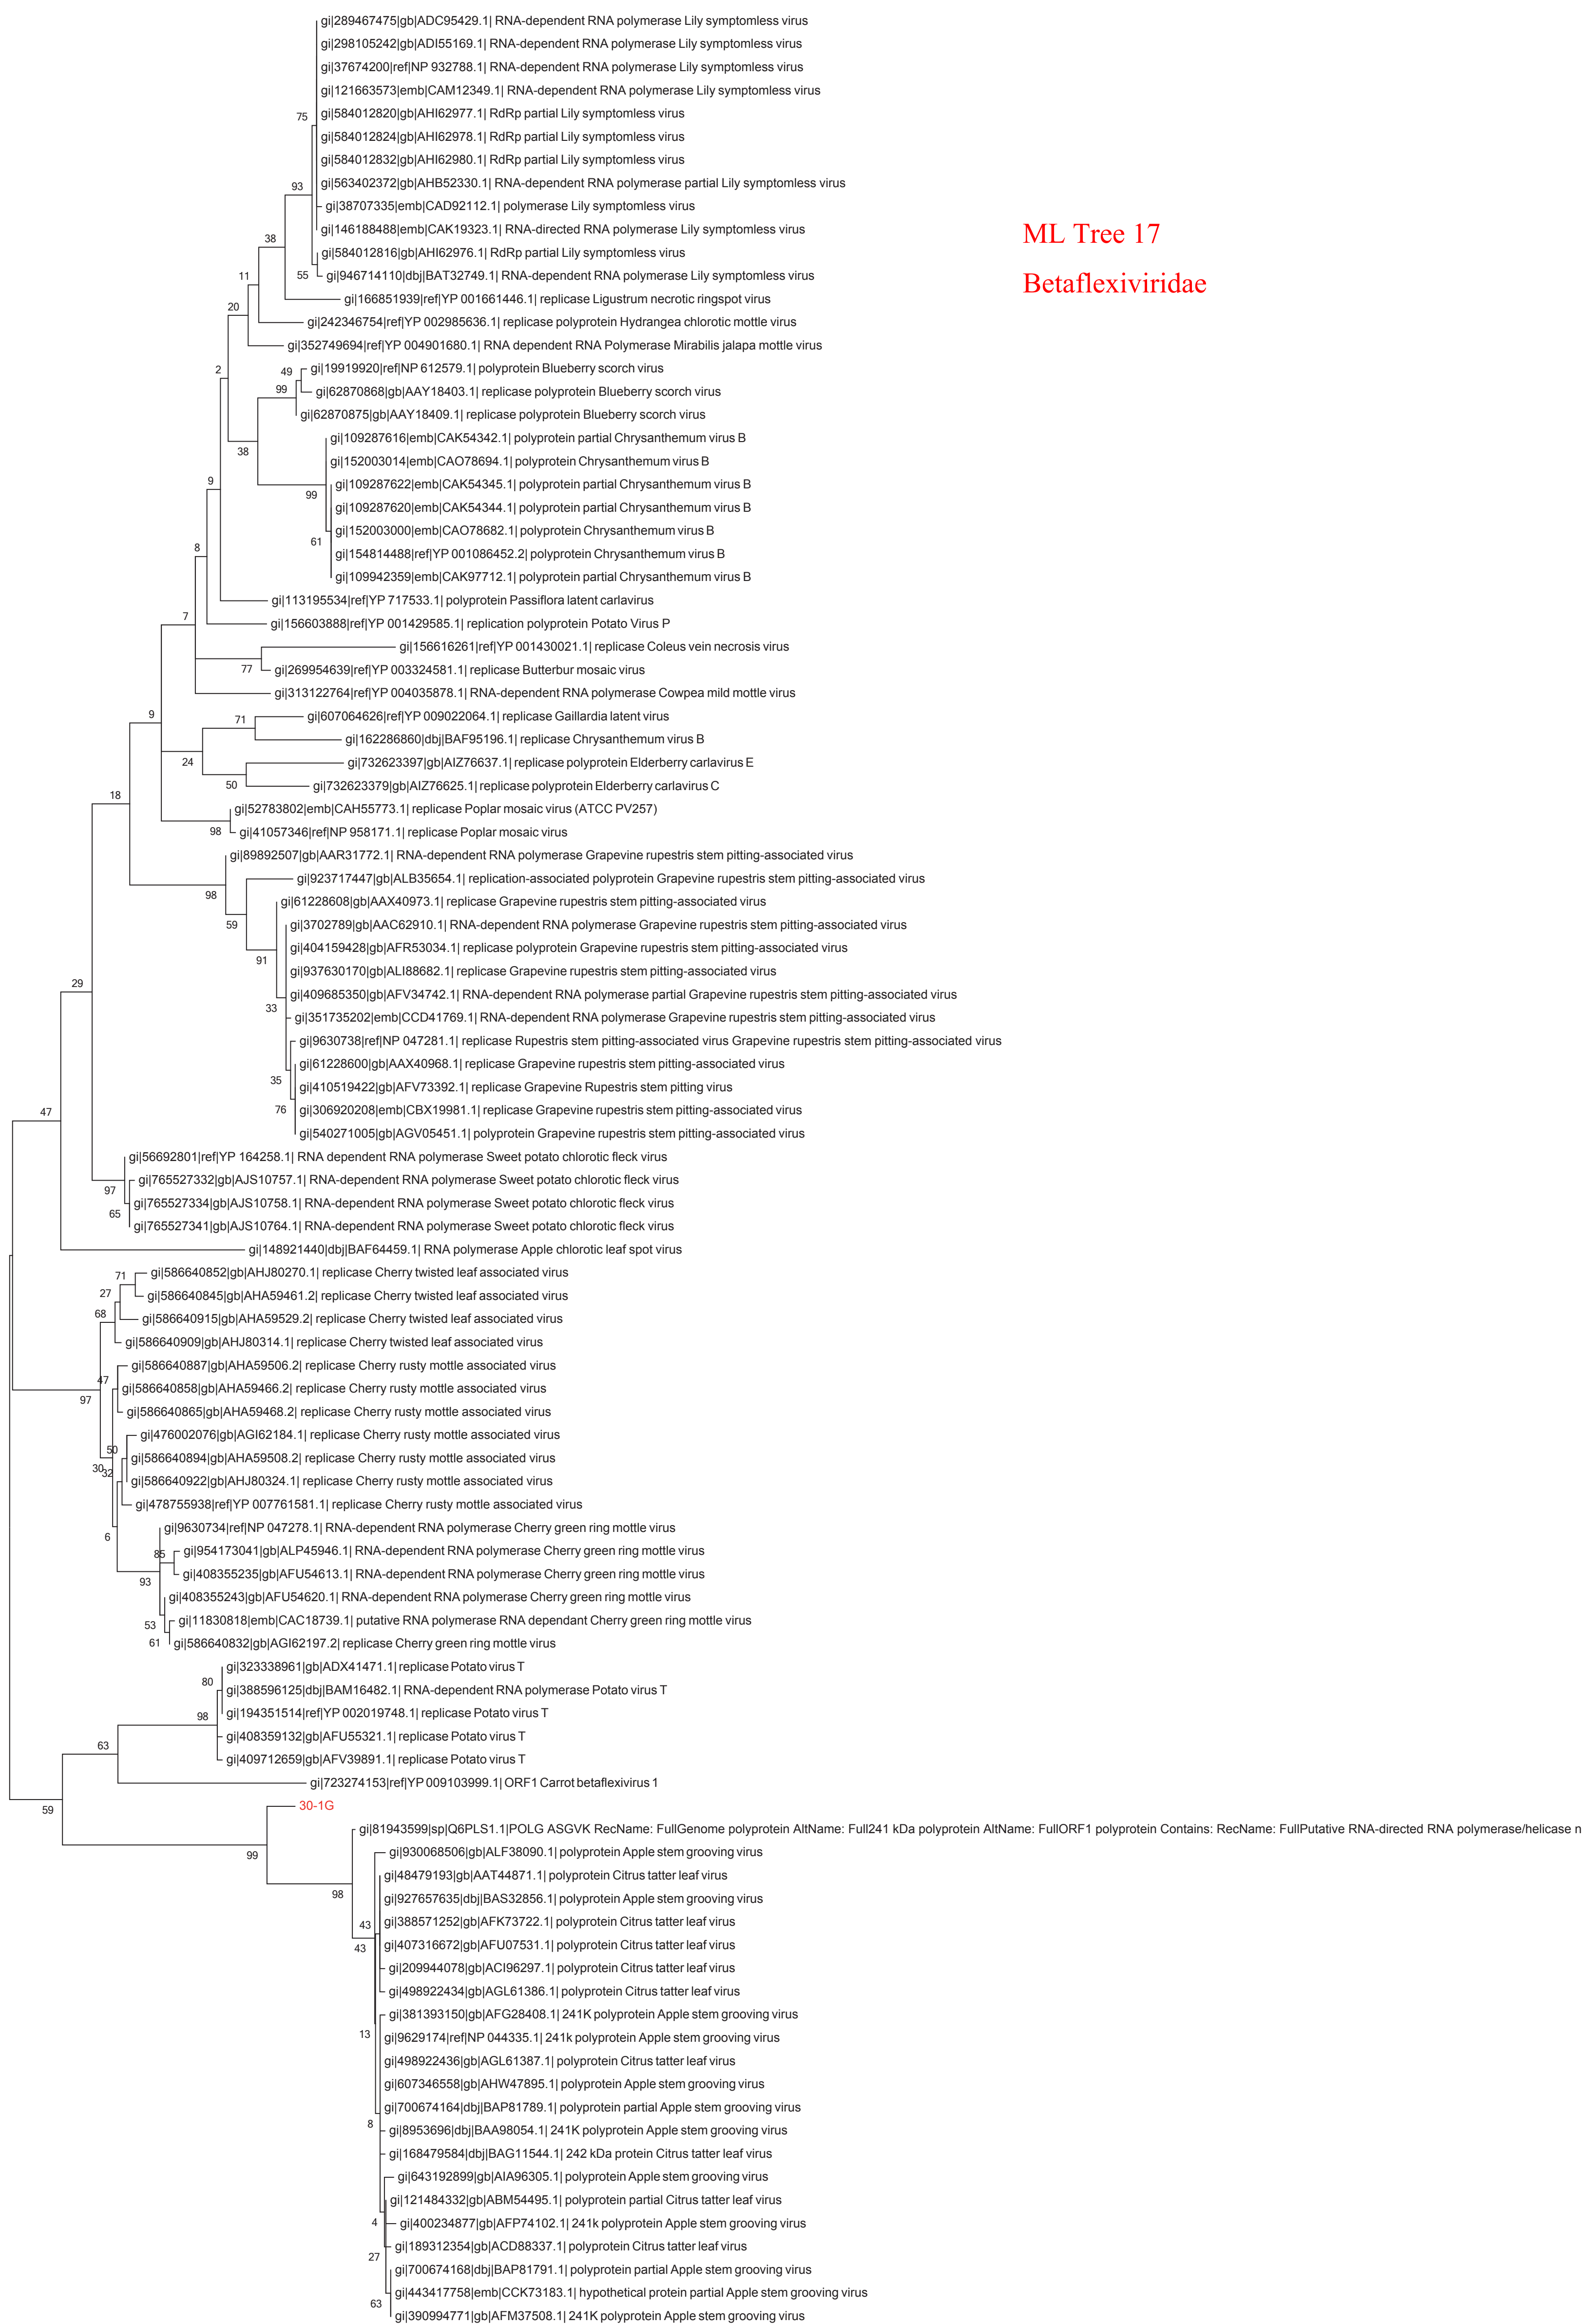

0.2

# ML Tree 18

## Betaflexiviridae

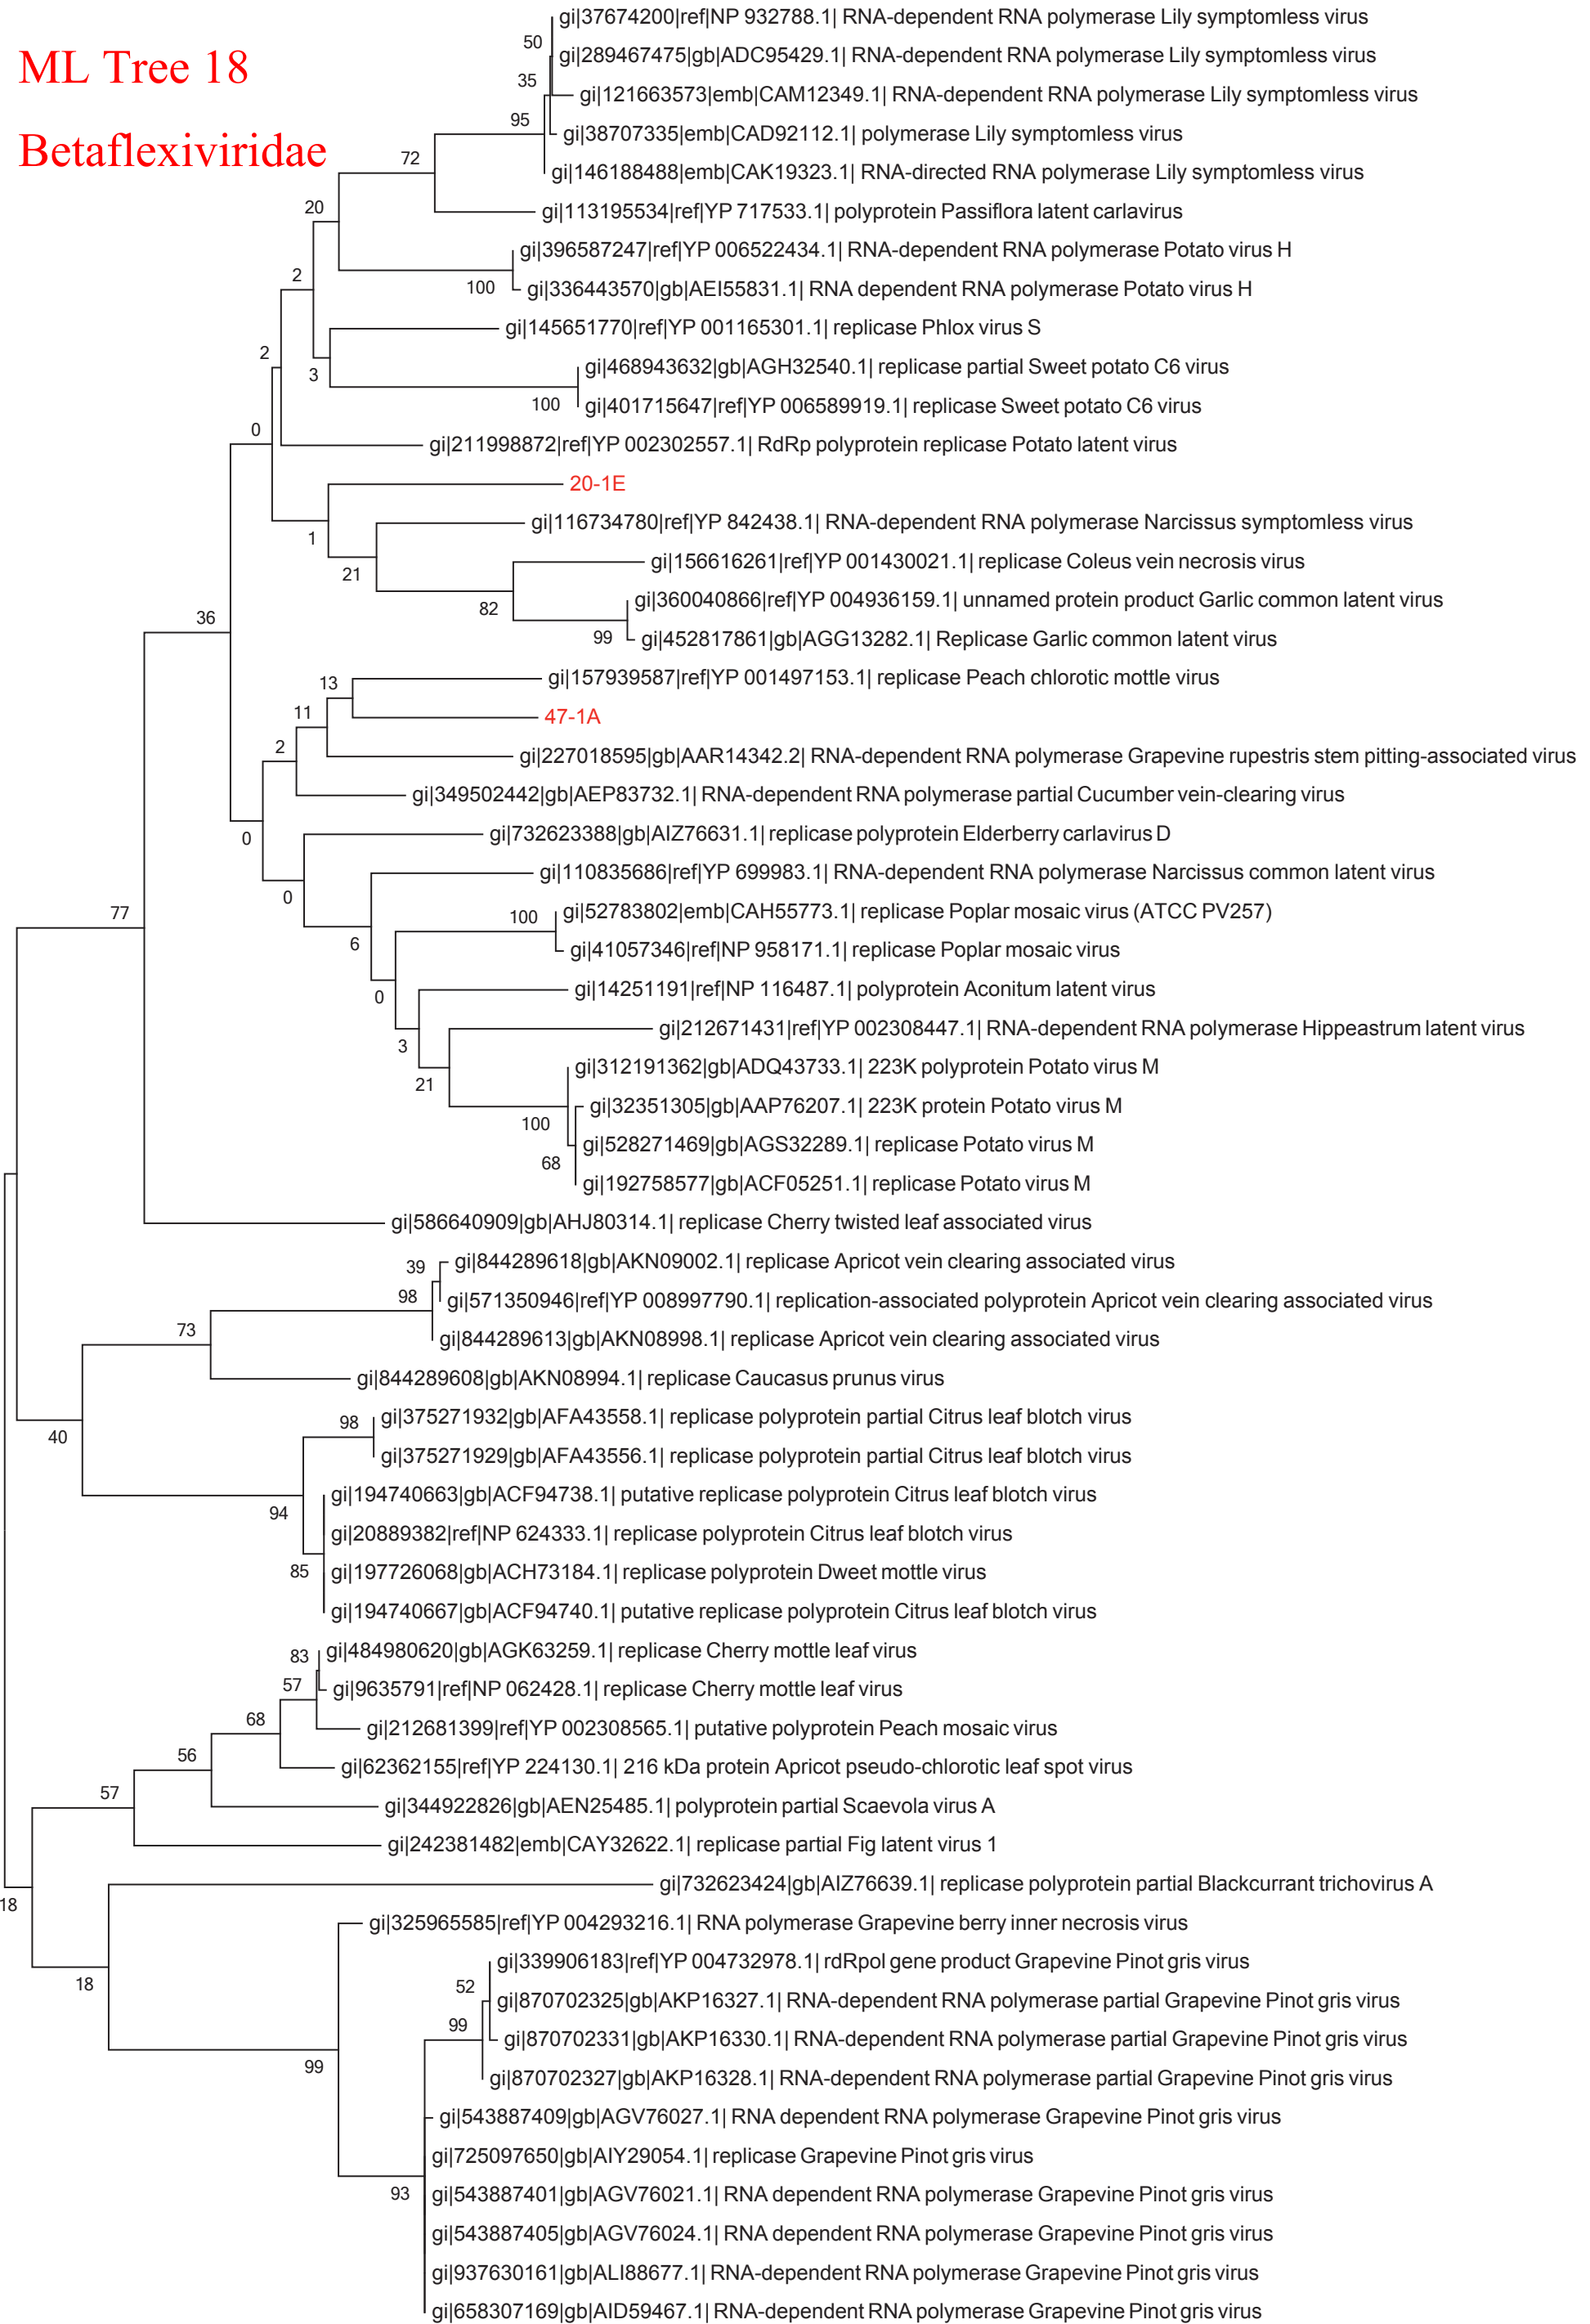

0.2



# ML Tree 19

## Betaflexiviridae

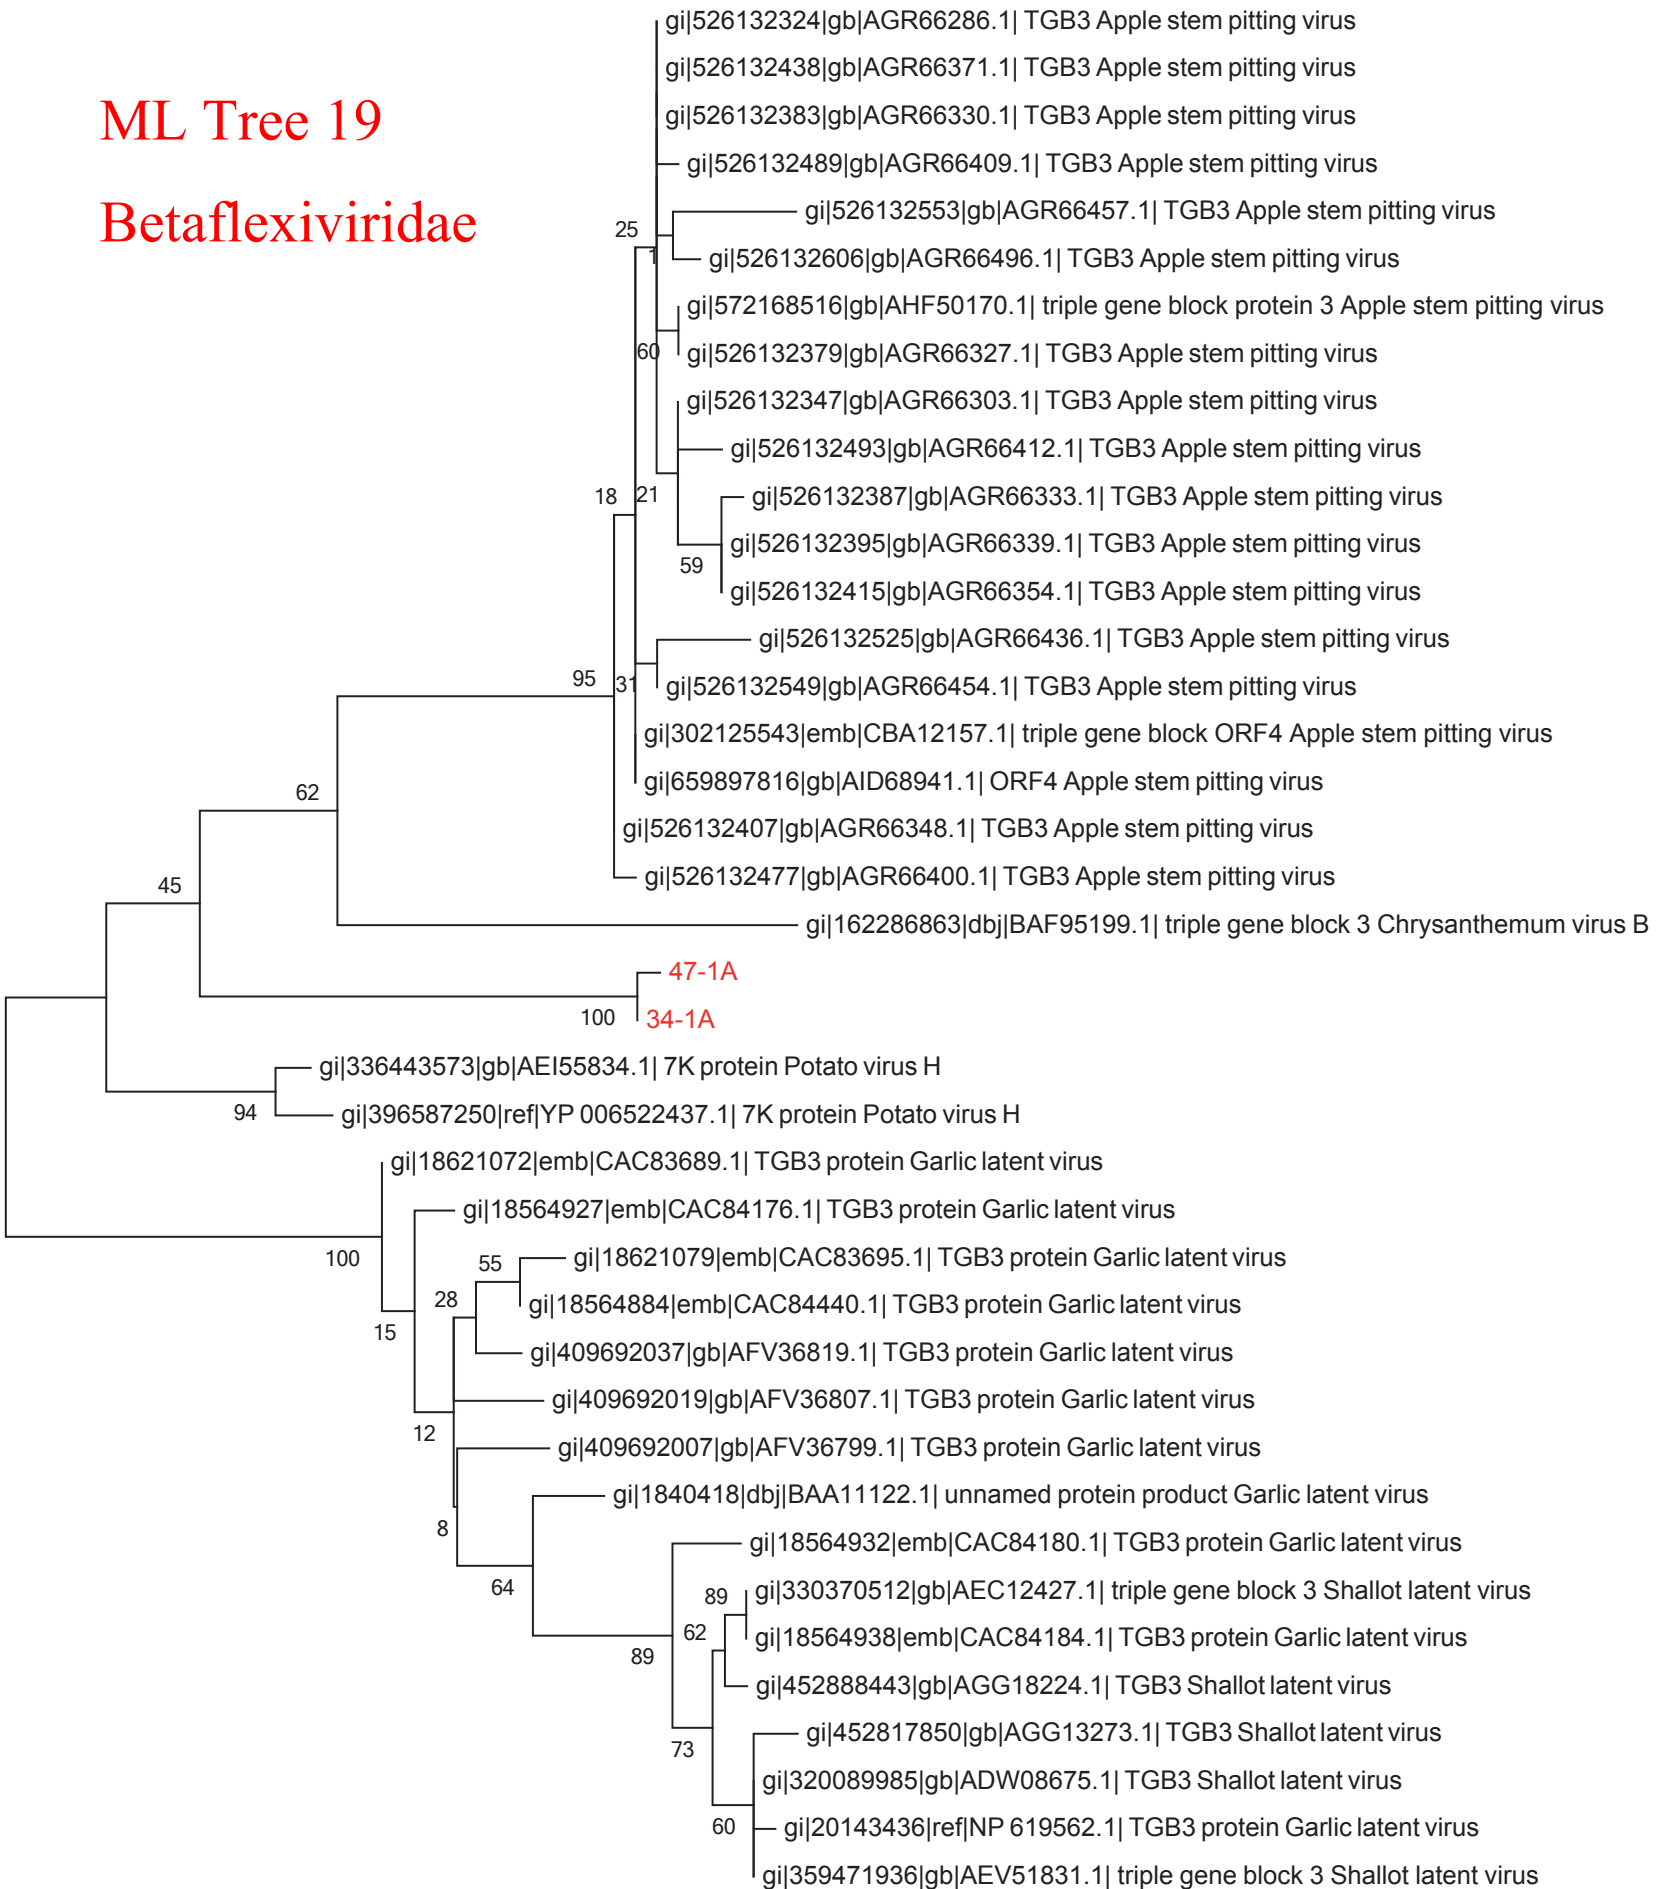

0.1



ML Tree 20  
Flexiviridae

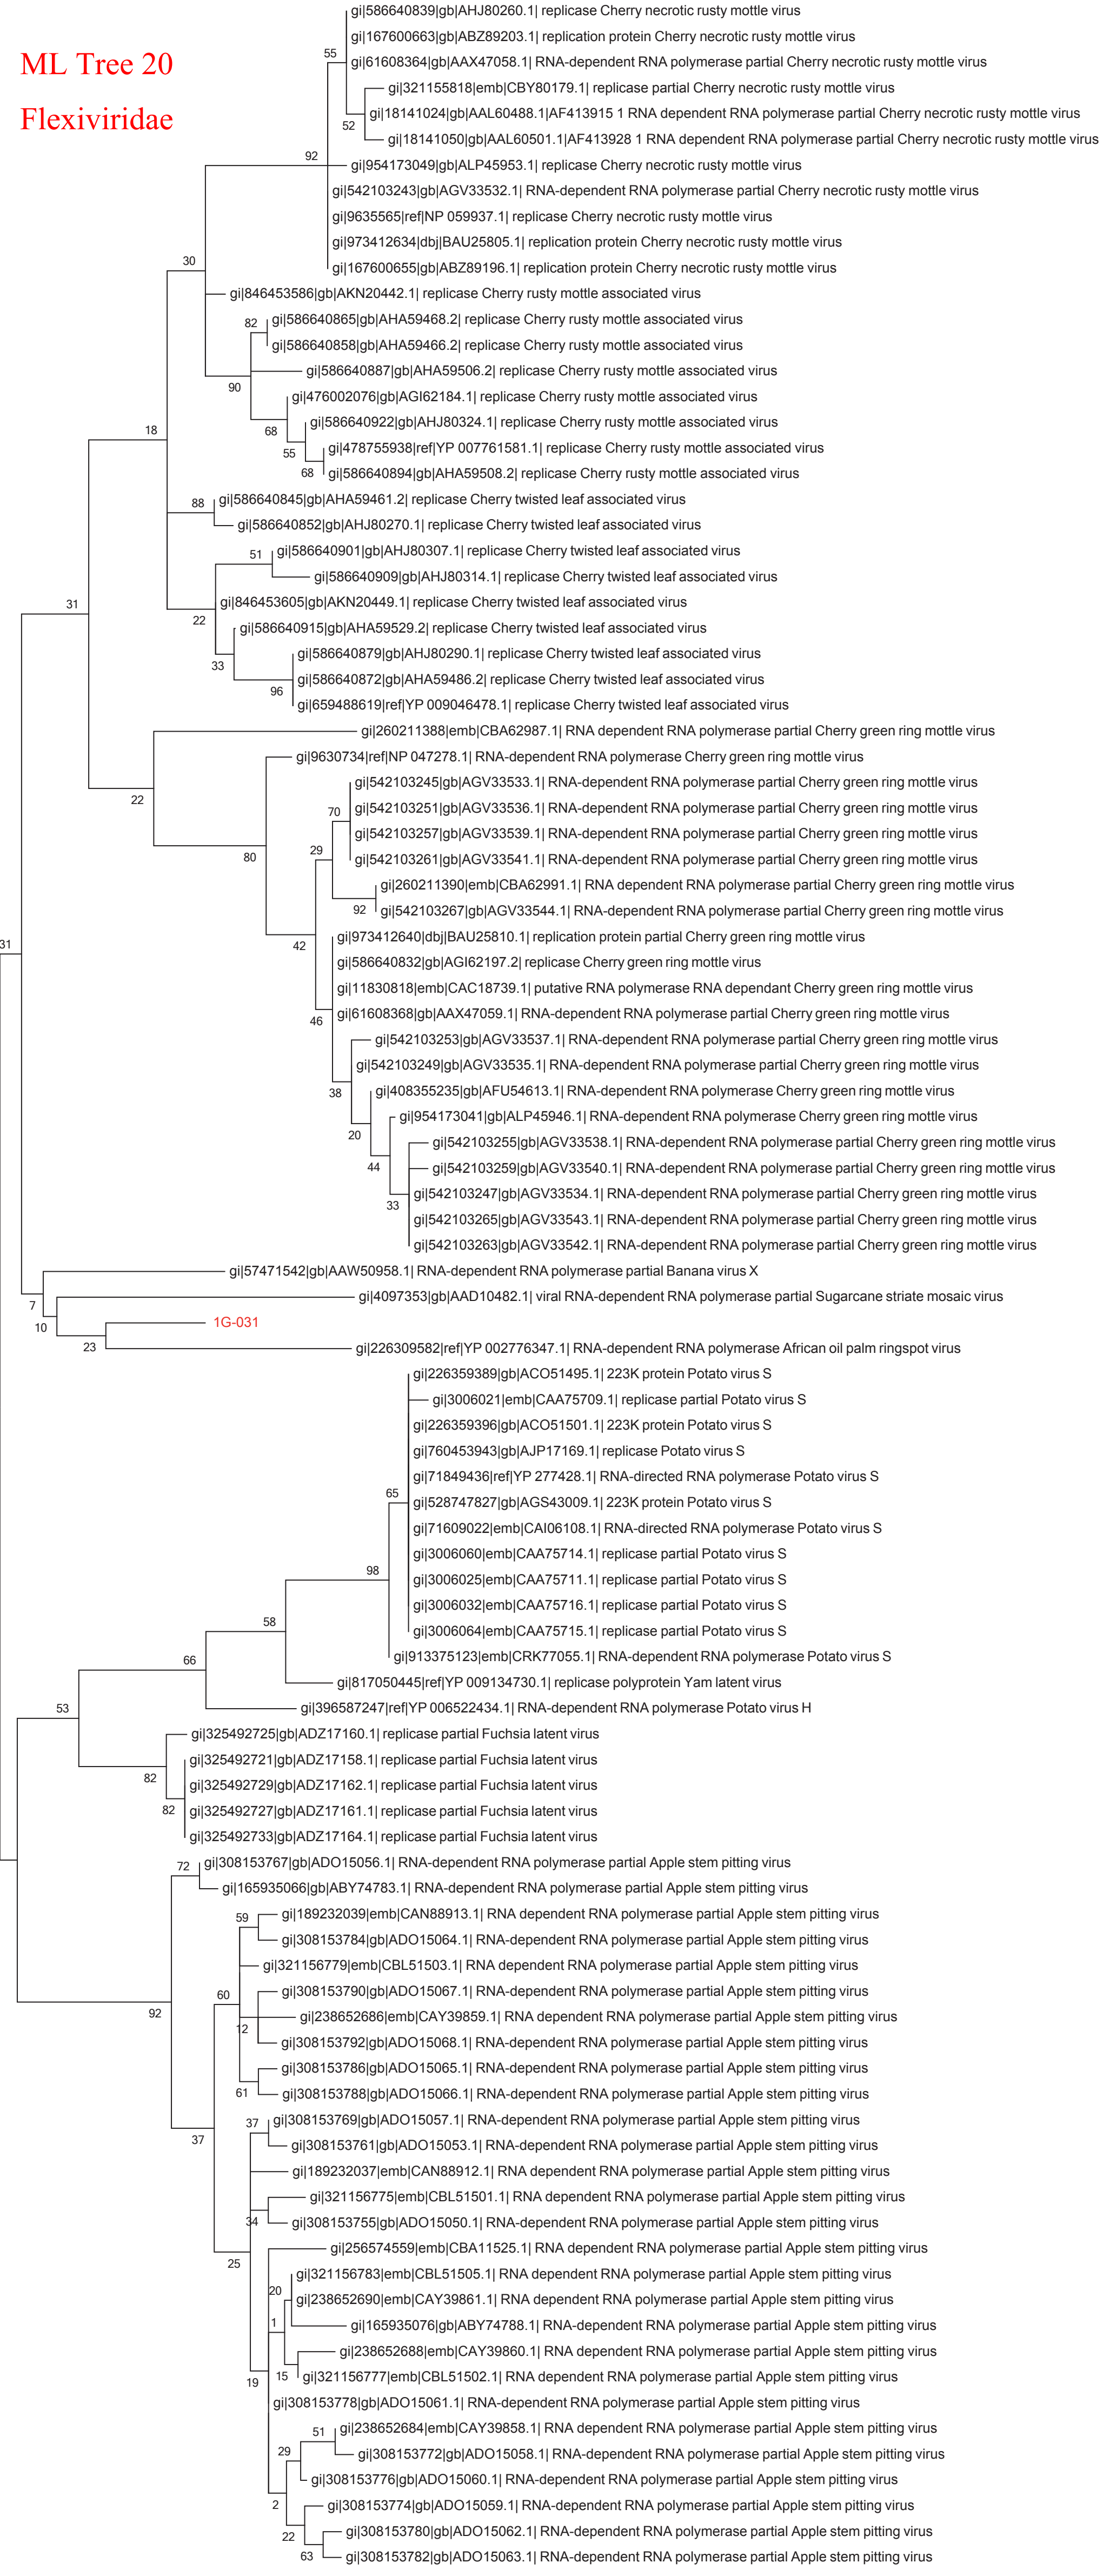

0.05

ML Tree 21

Bromoviridae

gi|20177487|ref|NP 619771.1| putative 2a protein Pelargonium zonate spot virus  
gi|408475274|gb|AFU72537.1| protein 2a Pelargonium zonate spot virus  
gi|816255934|gb|AHG25372.3| replicase Pelargonium zonate spot virus

2012-03-D

0.5

# ML Tree 22

## Bromoviridae

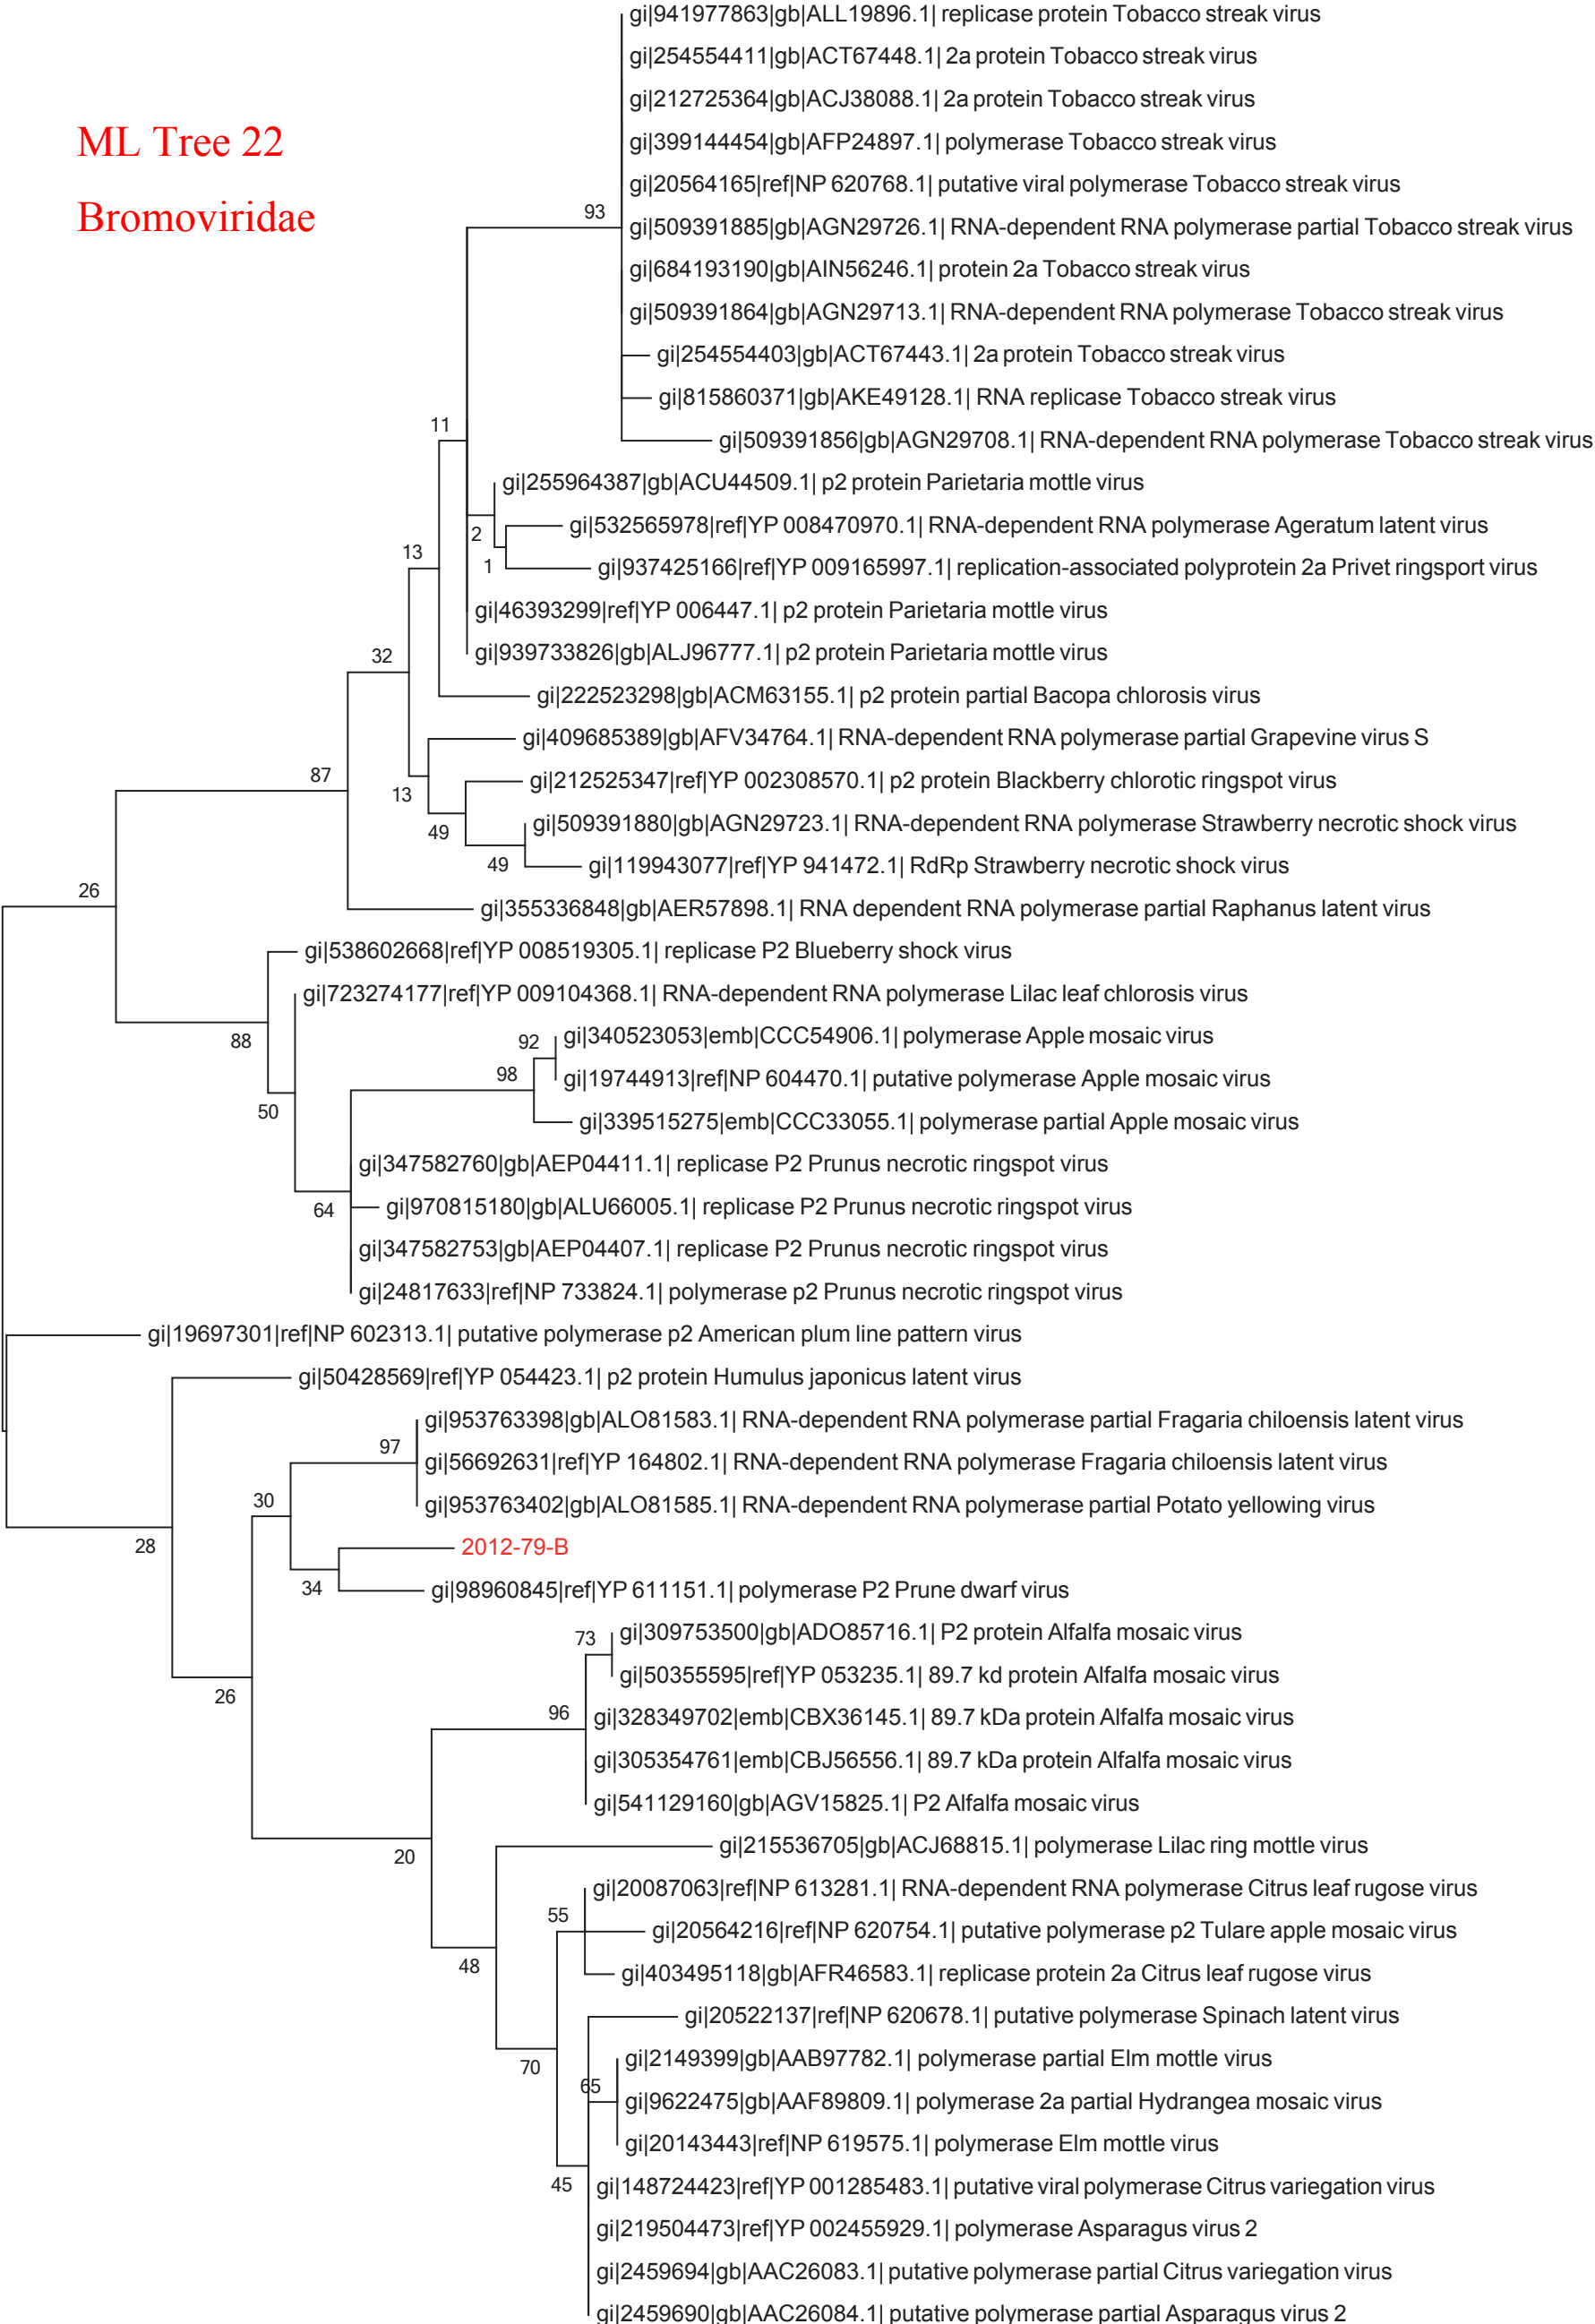

0.1



ML Tree 23  
Bromoviridae

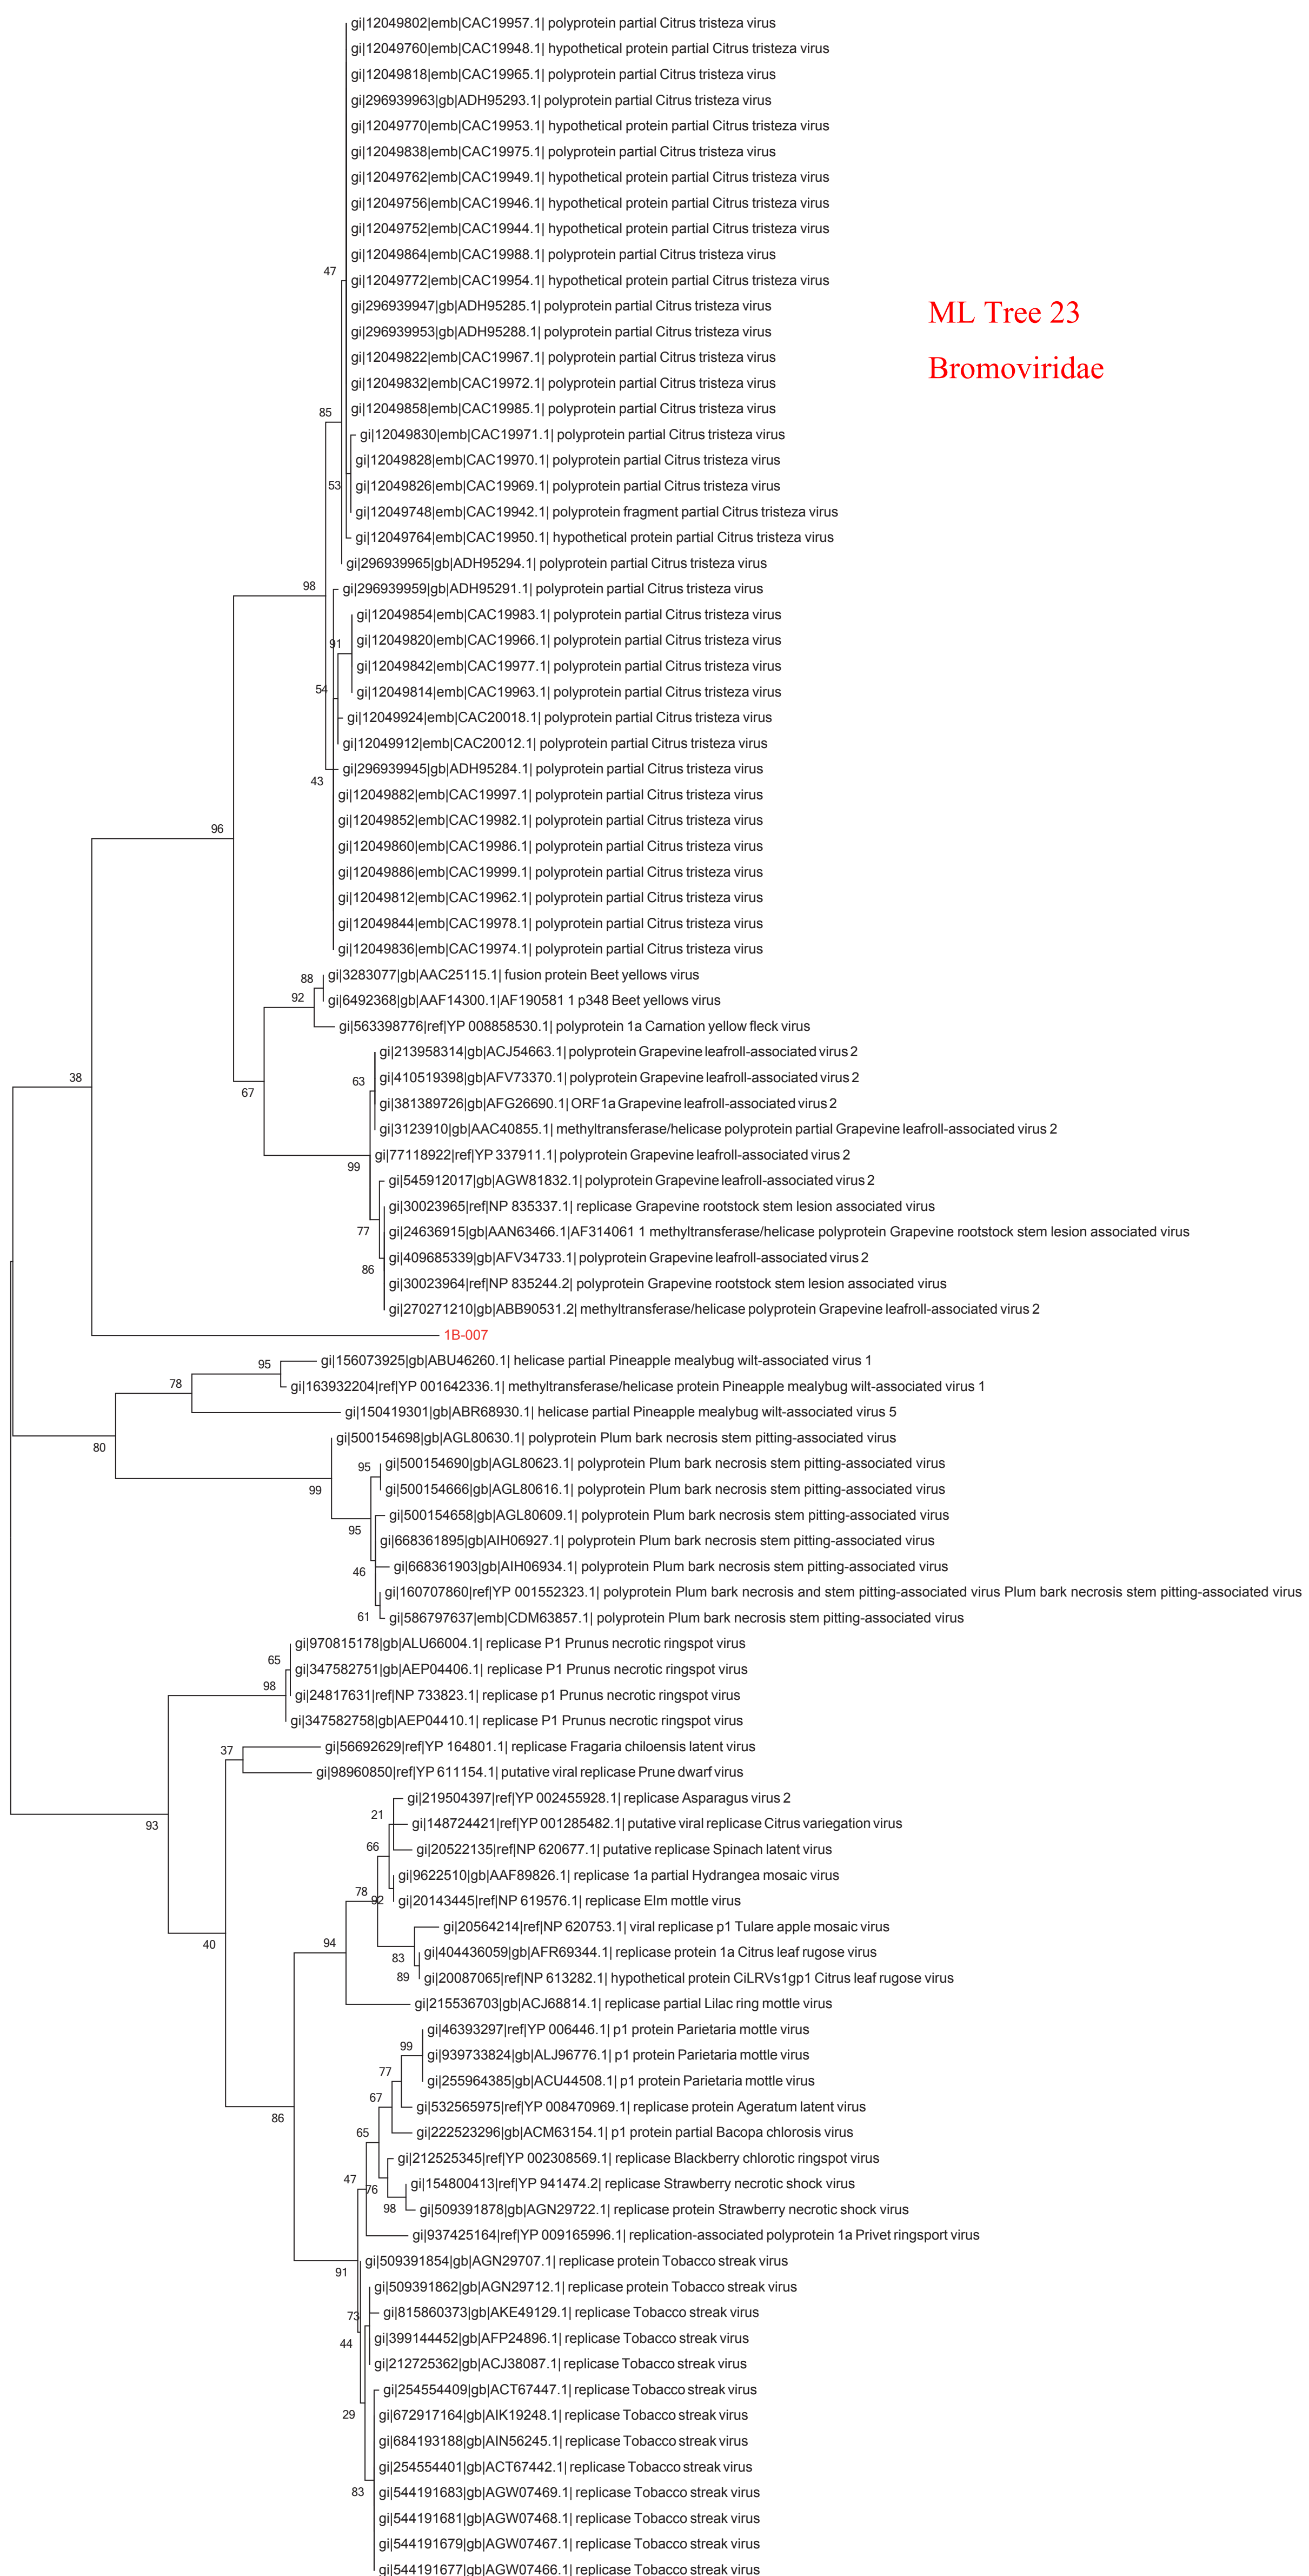



ML Tree 22  
Caulimoviridae

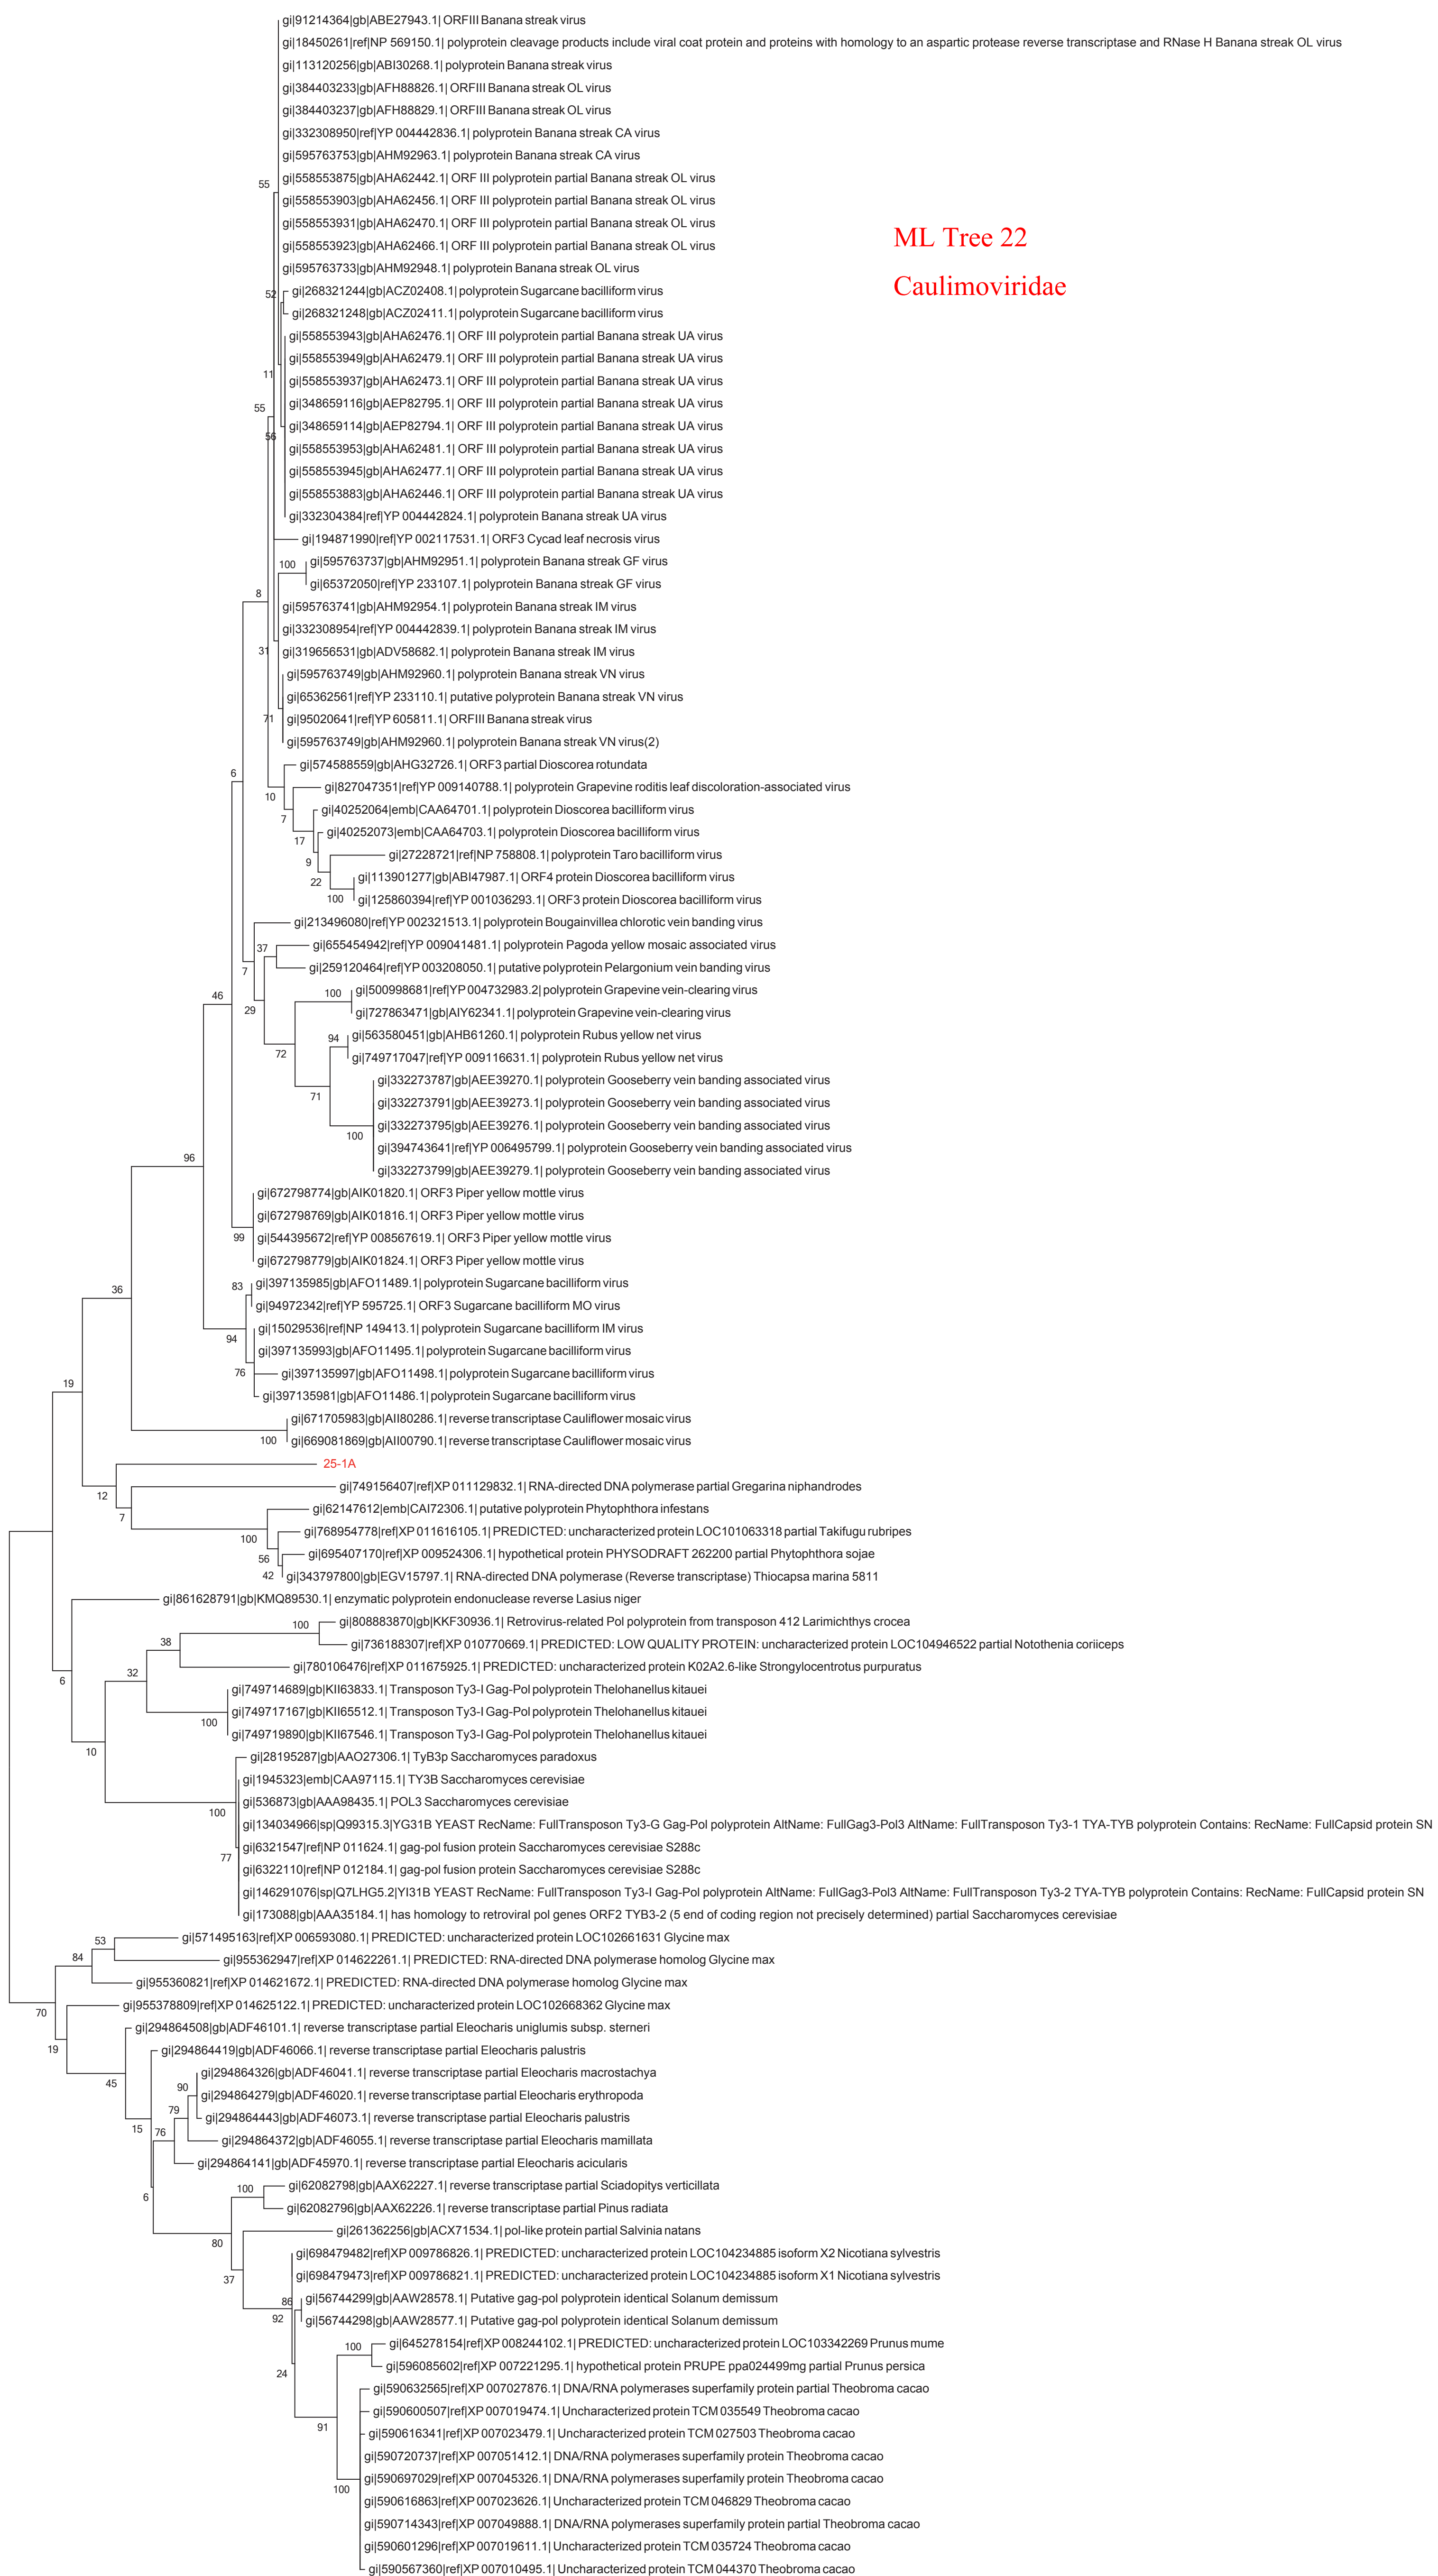



# ML Tree 25

## Caulimoviridae

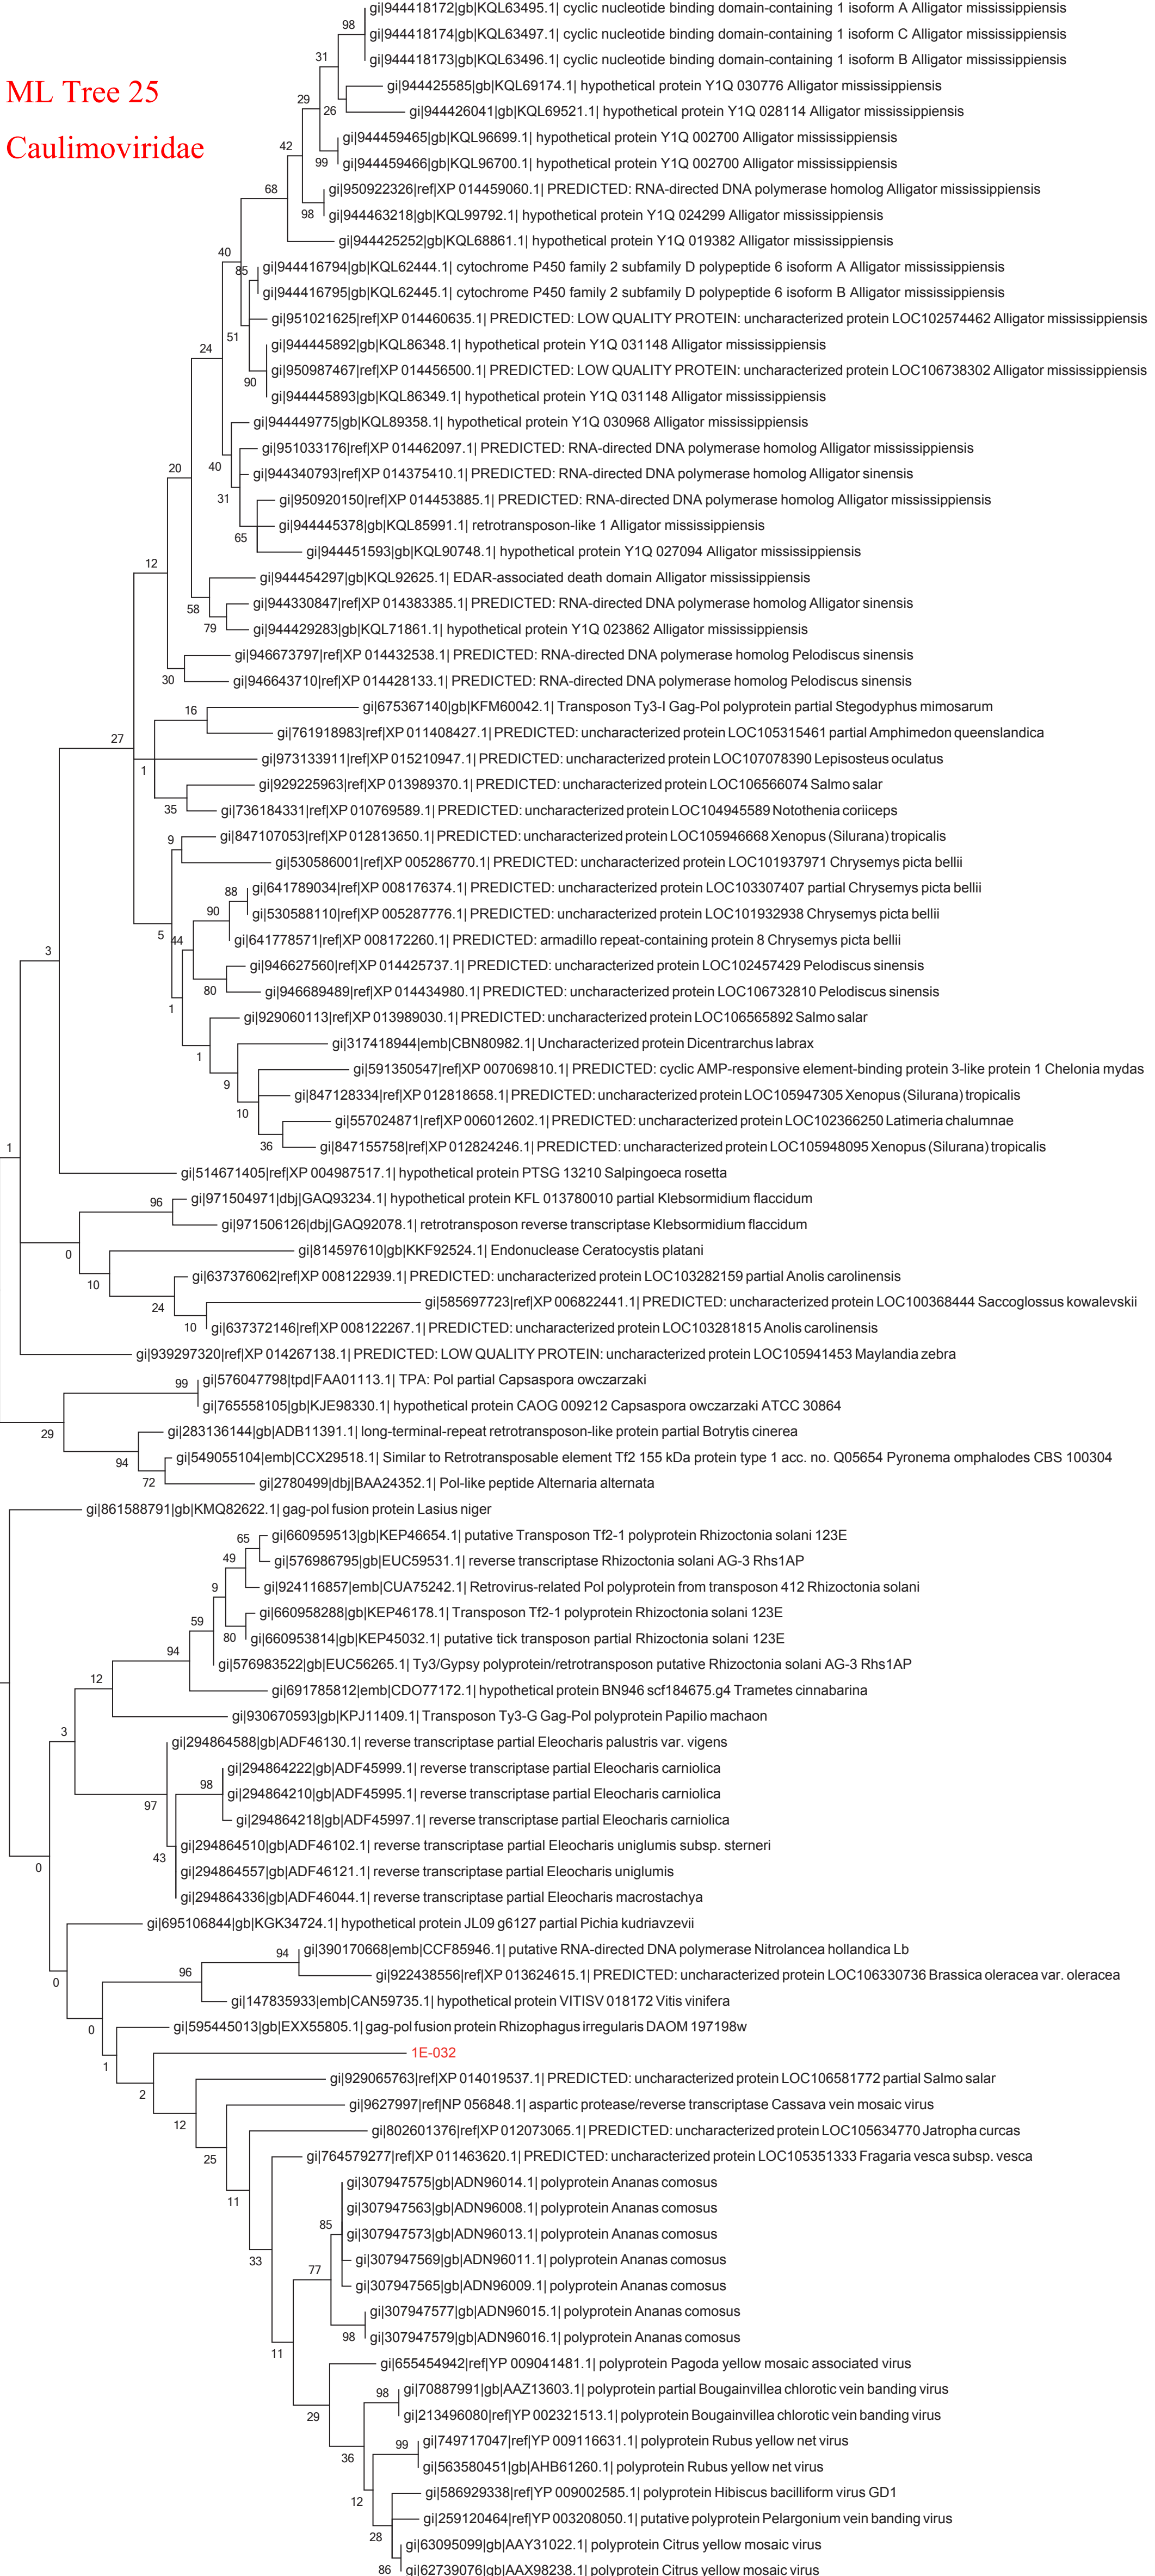

0.2

# ML Tree 26

## Caulimoviridae

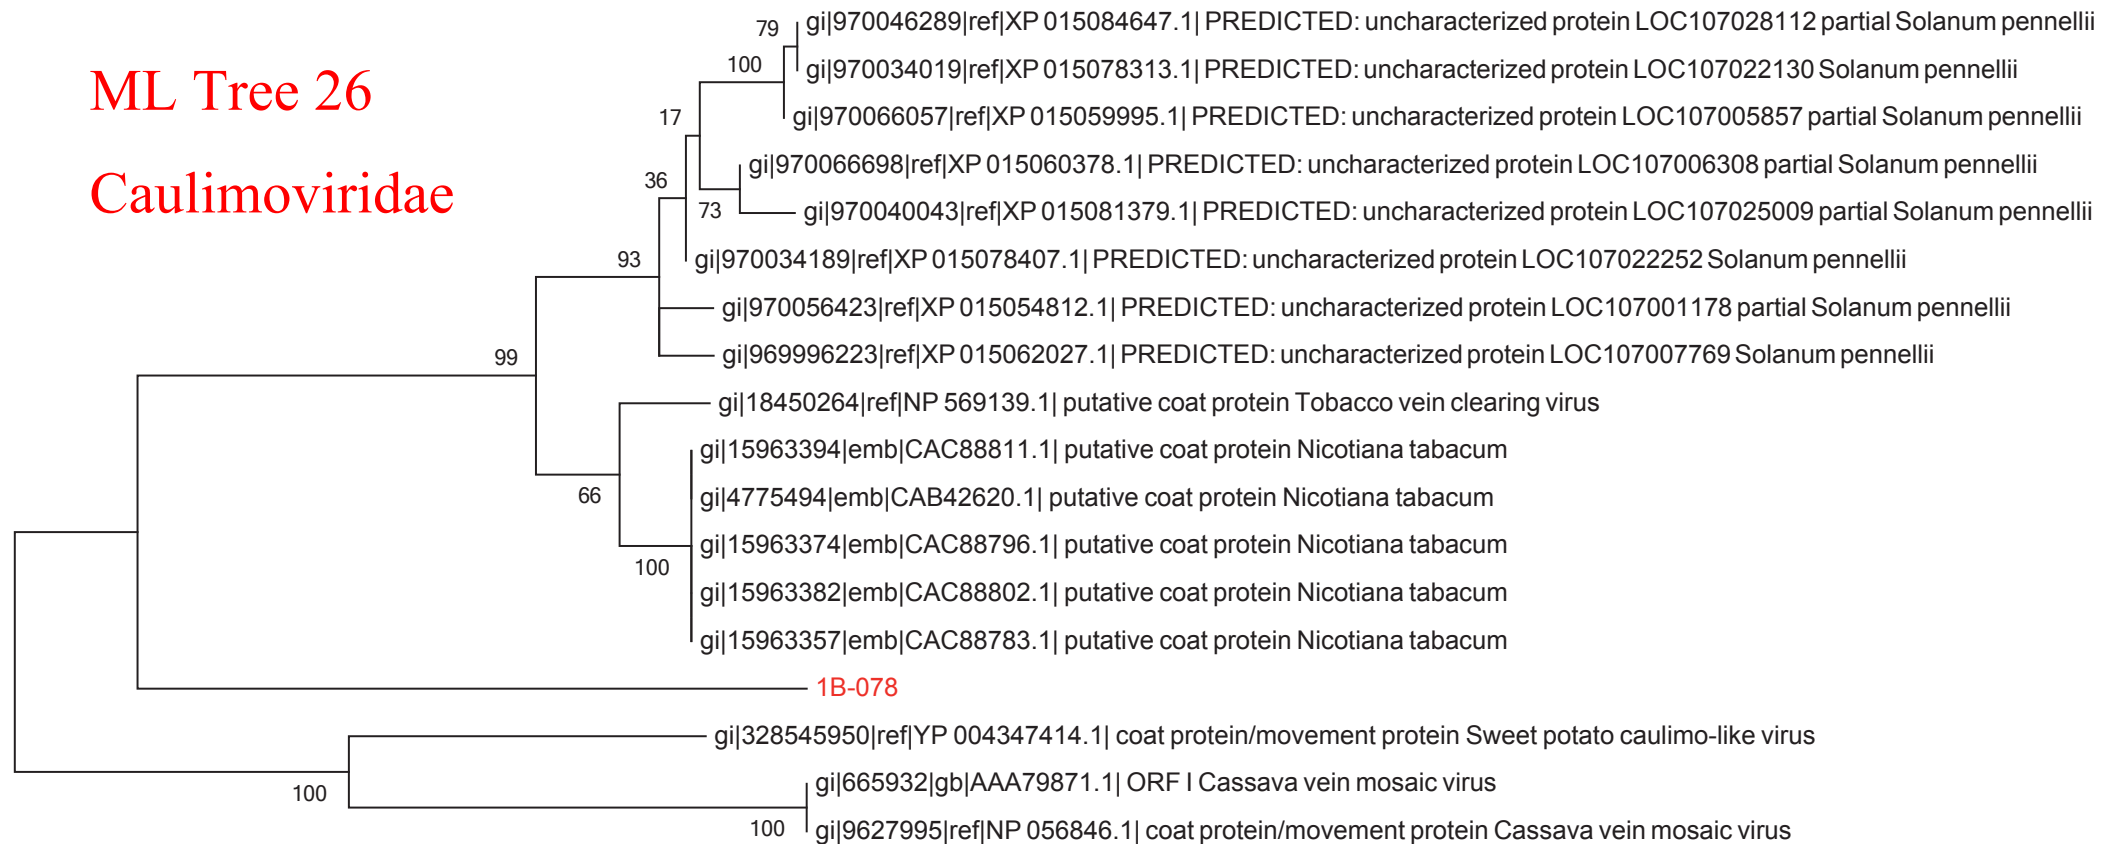

0.2



# ML Tree 27

## Caulimoviridae

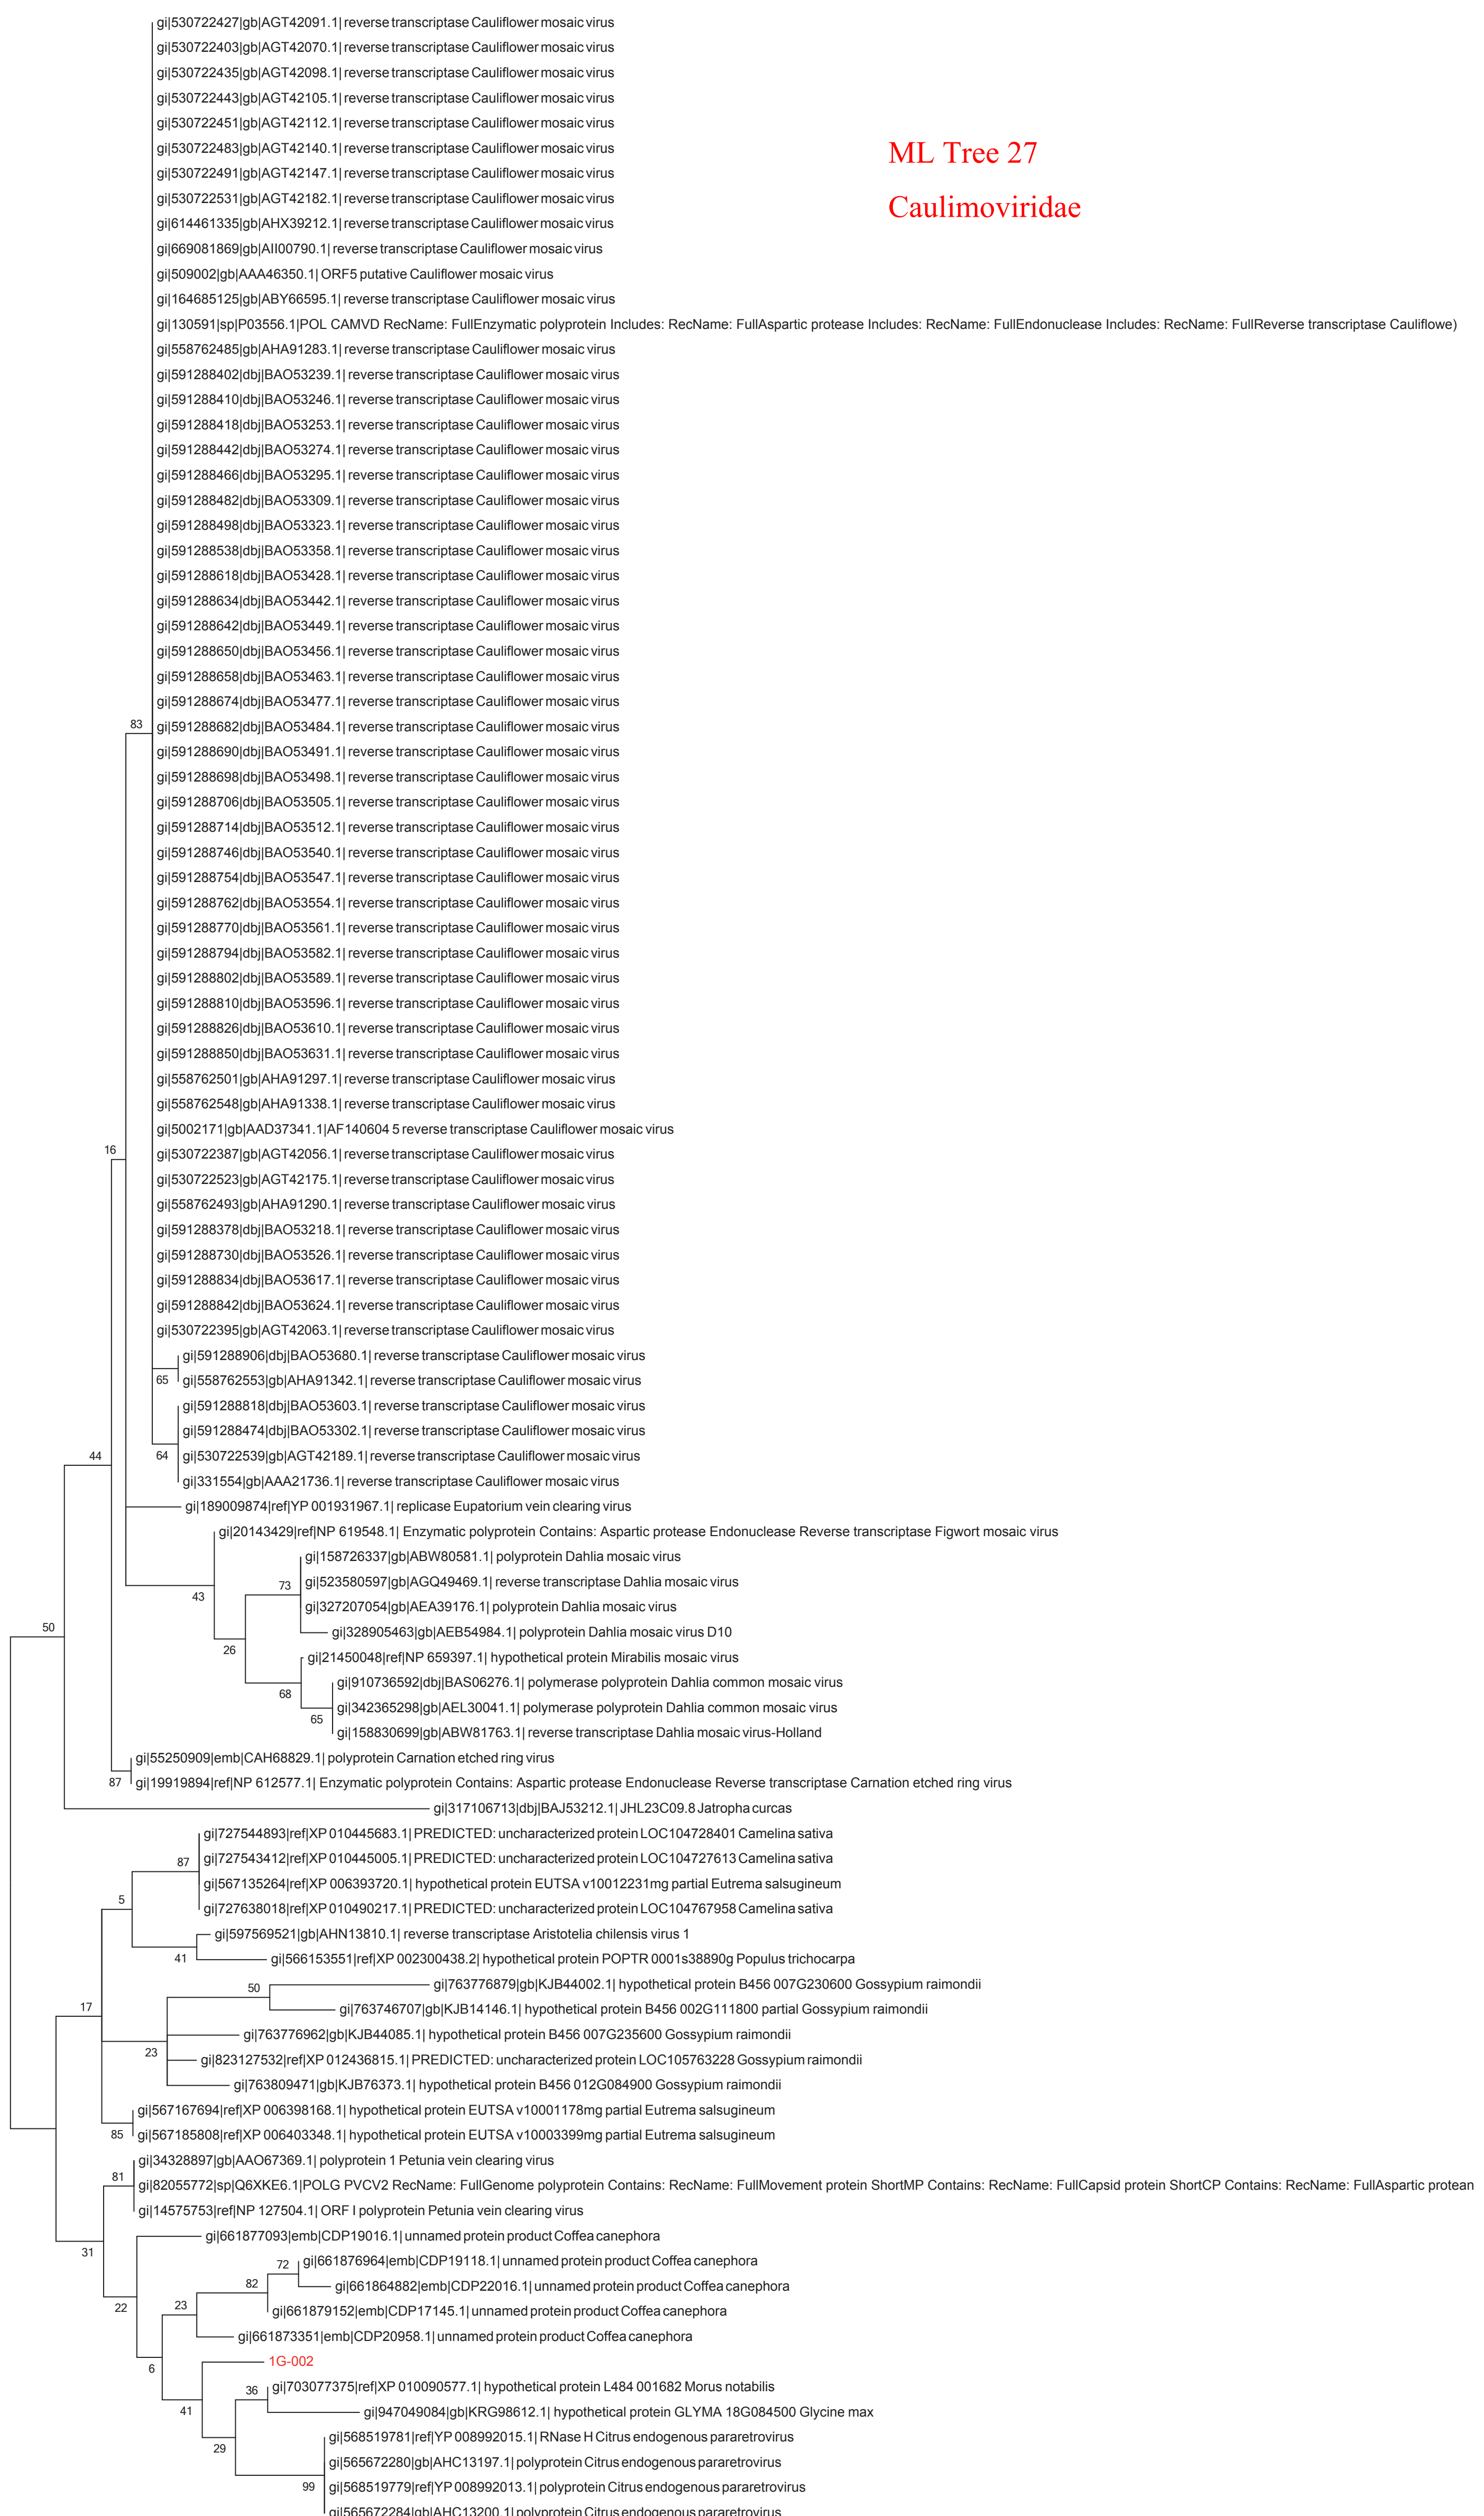

0.1

# ML Tree 28

## Caulimoviridae

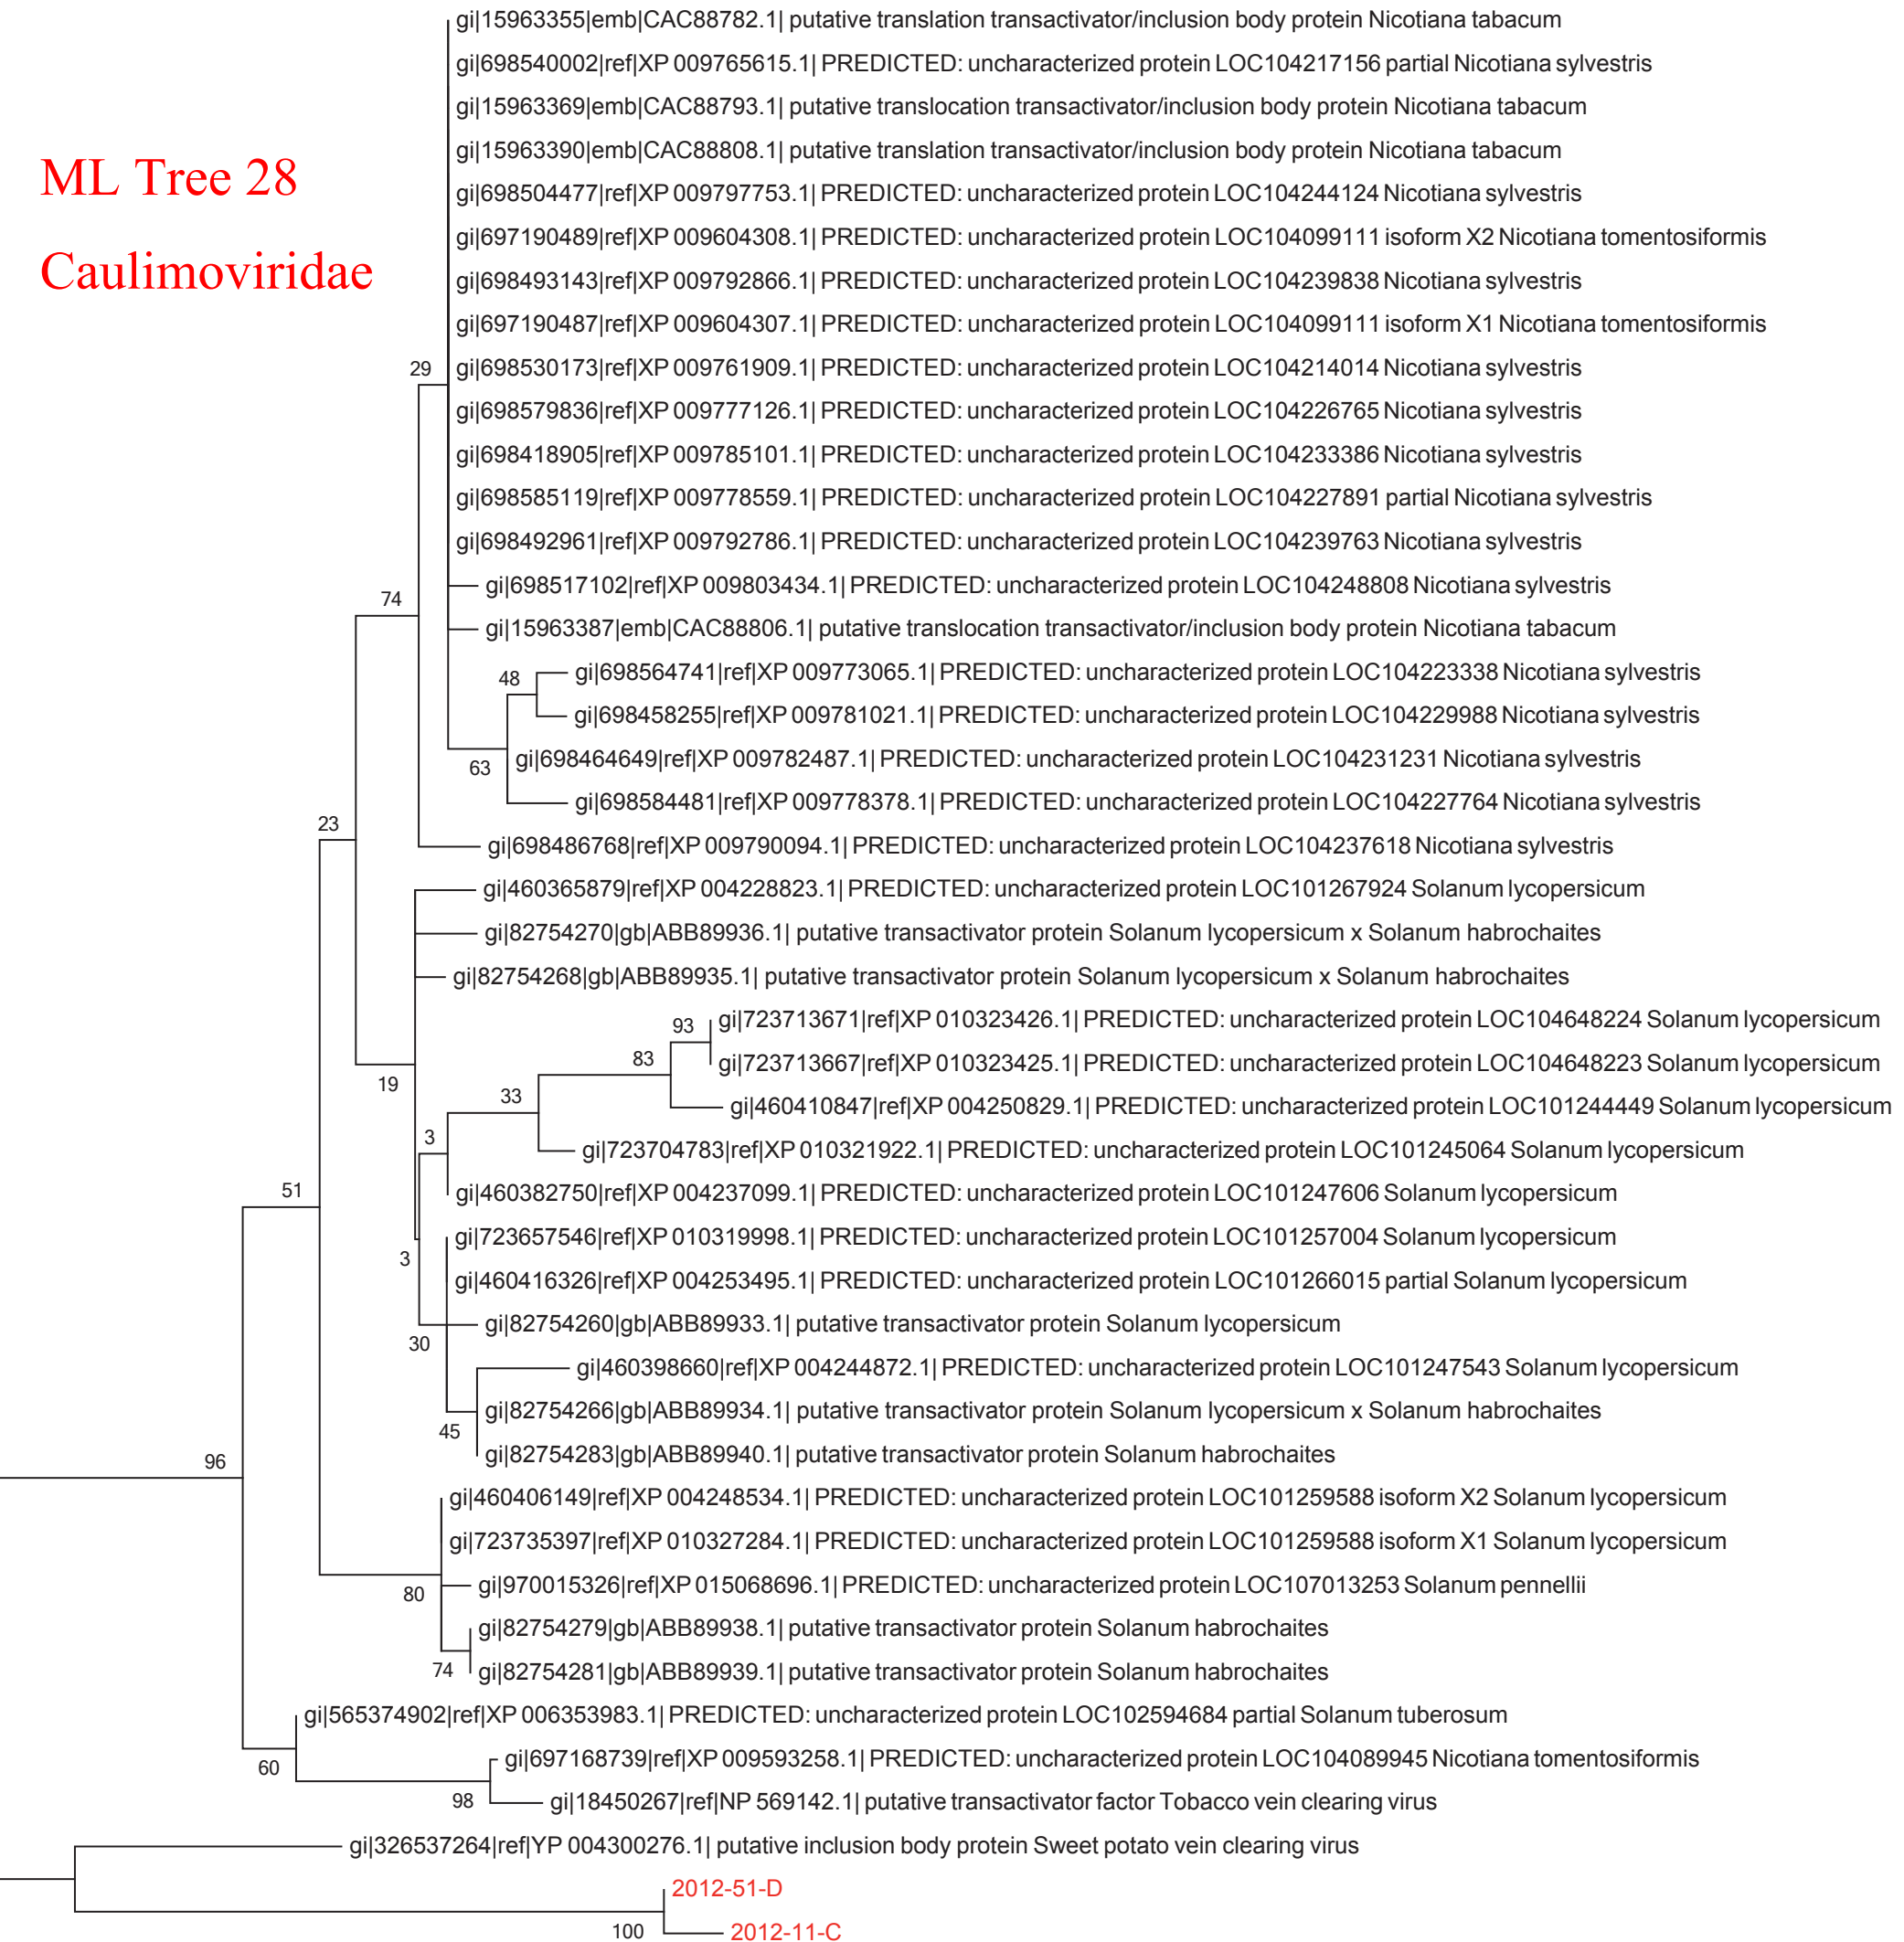

0.1



# ML Tree 29

## Caulimoviridae

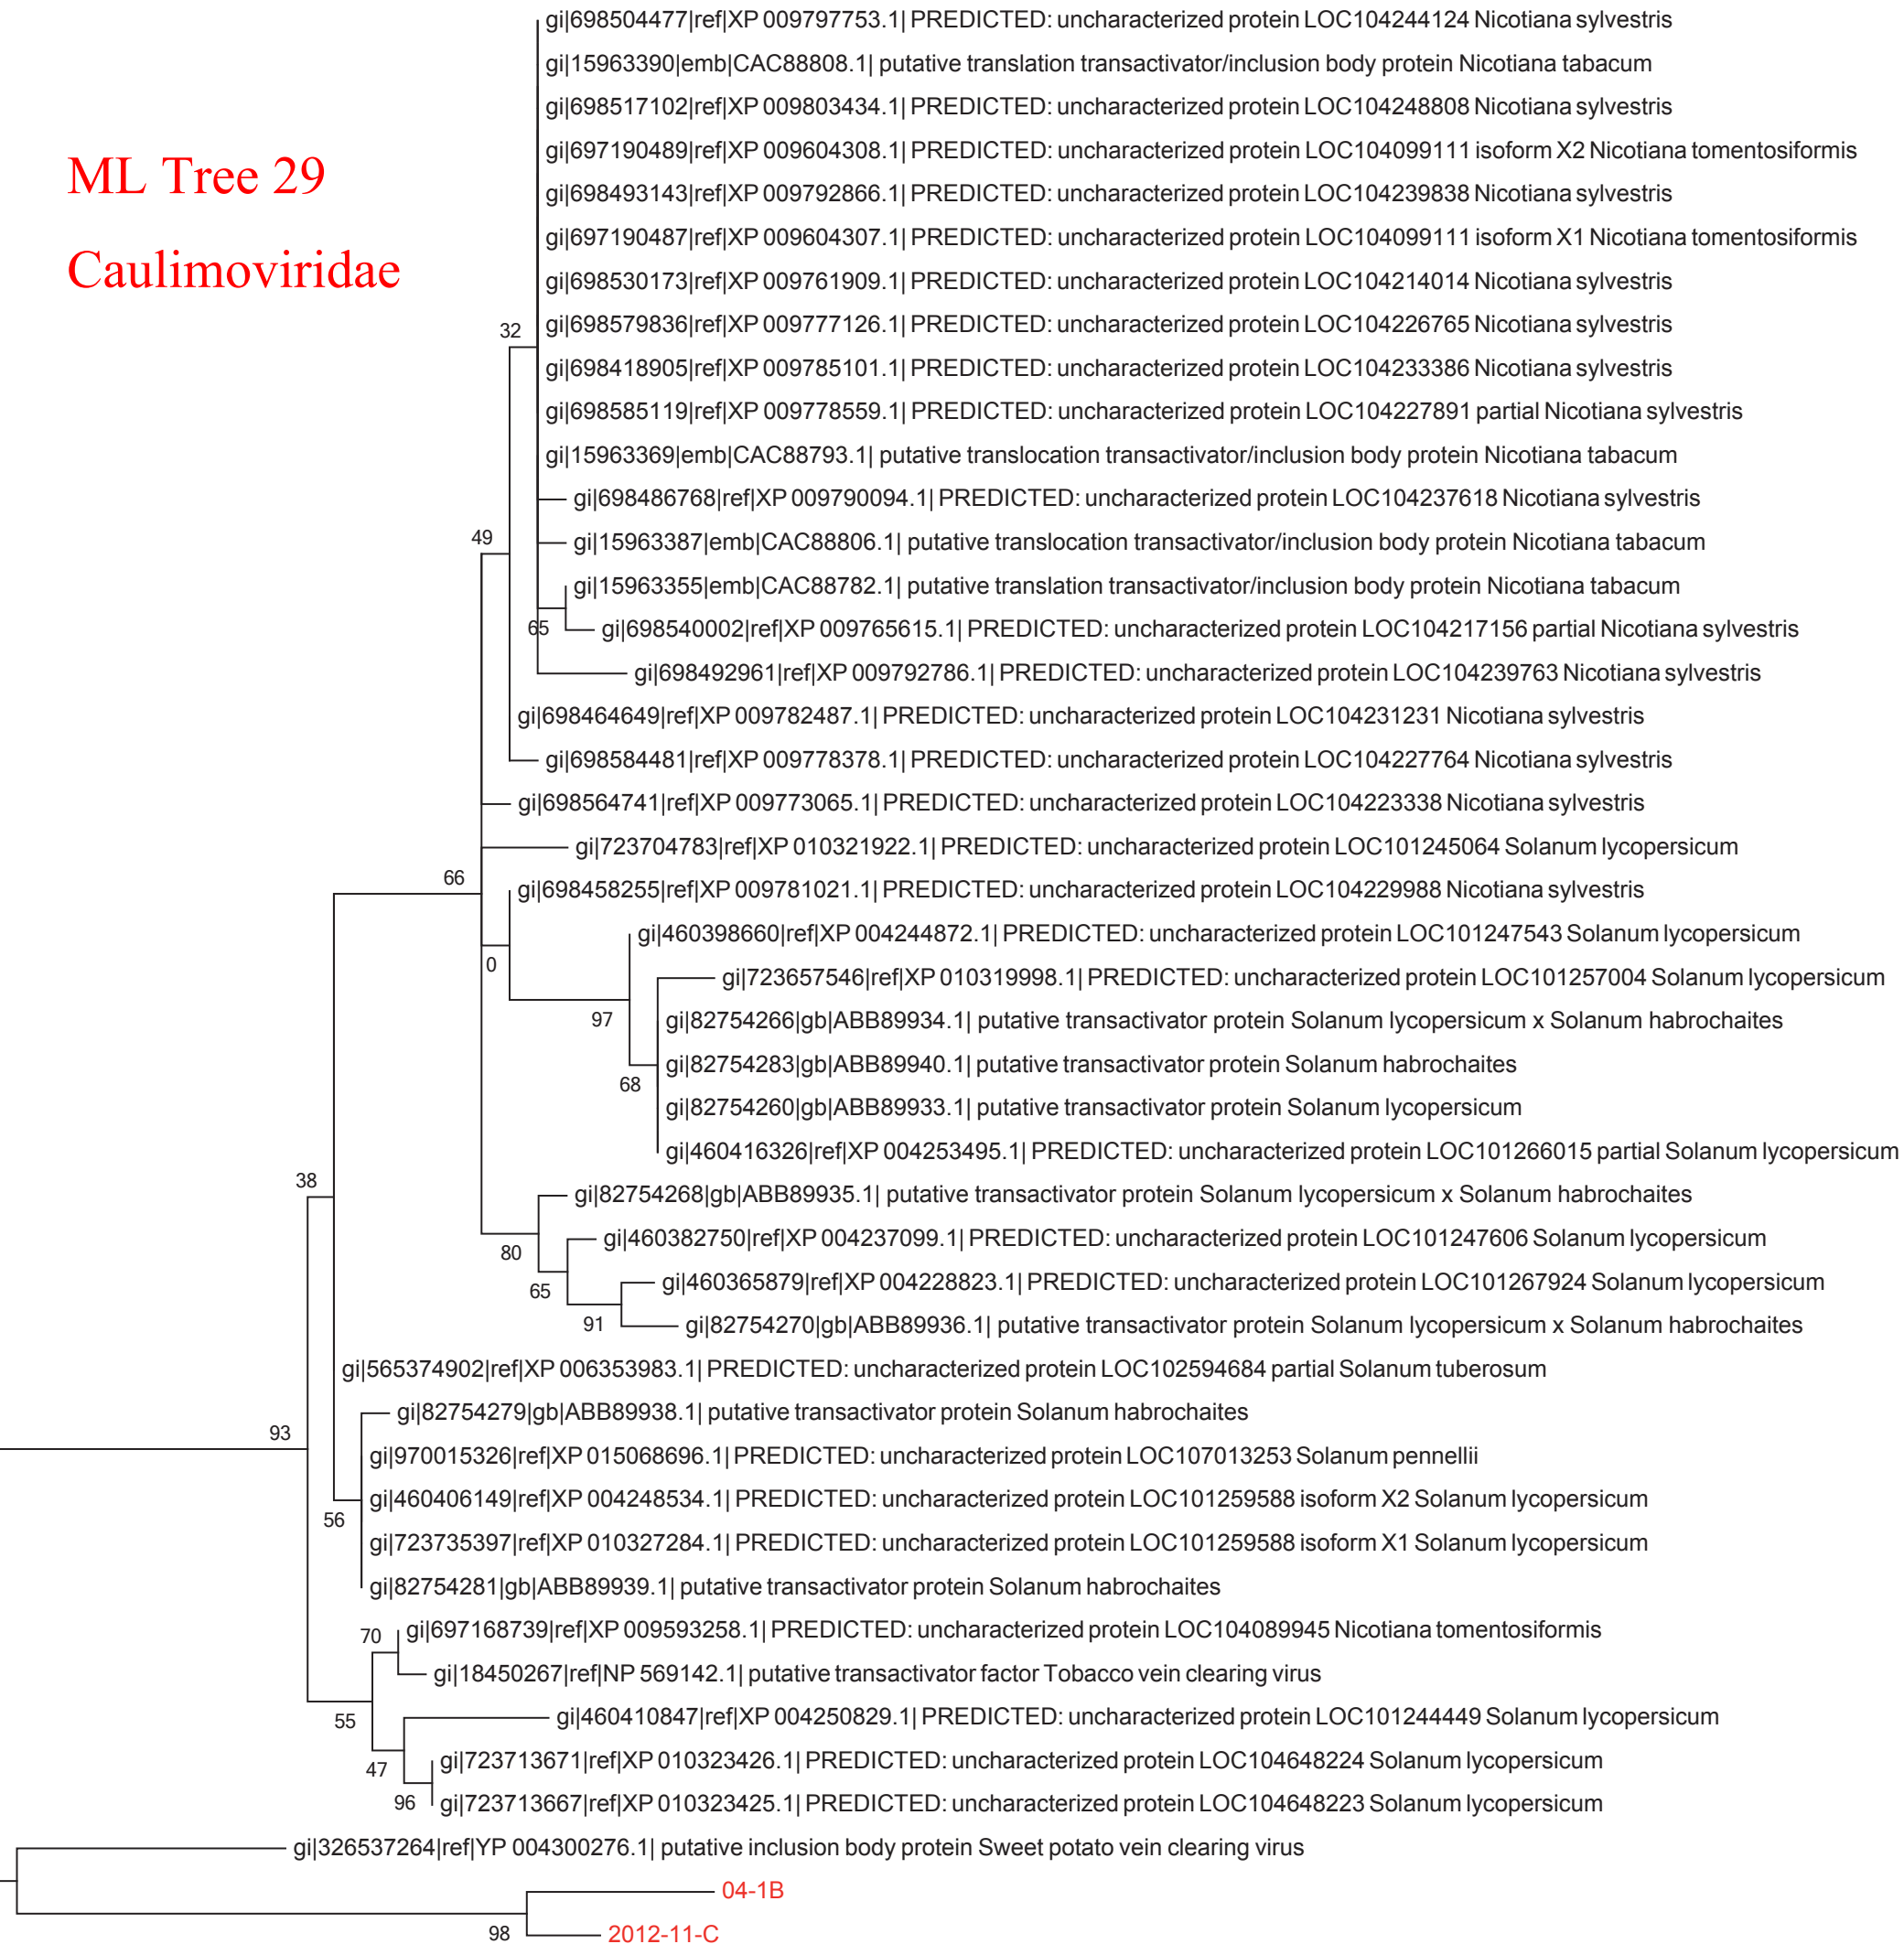

0.1



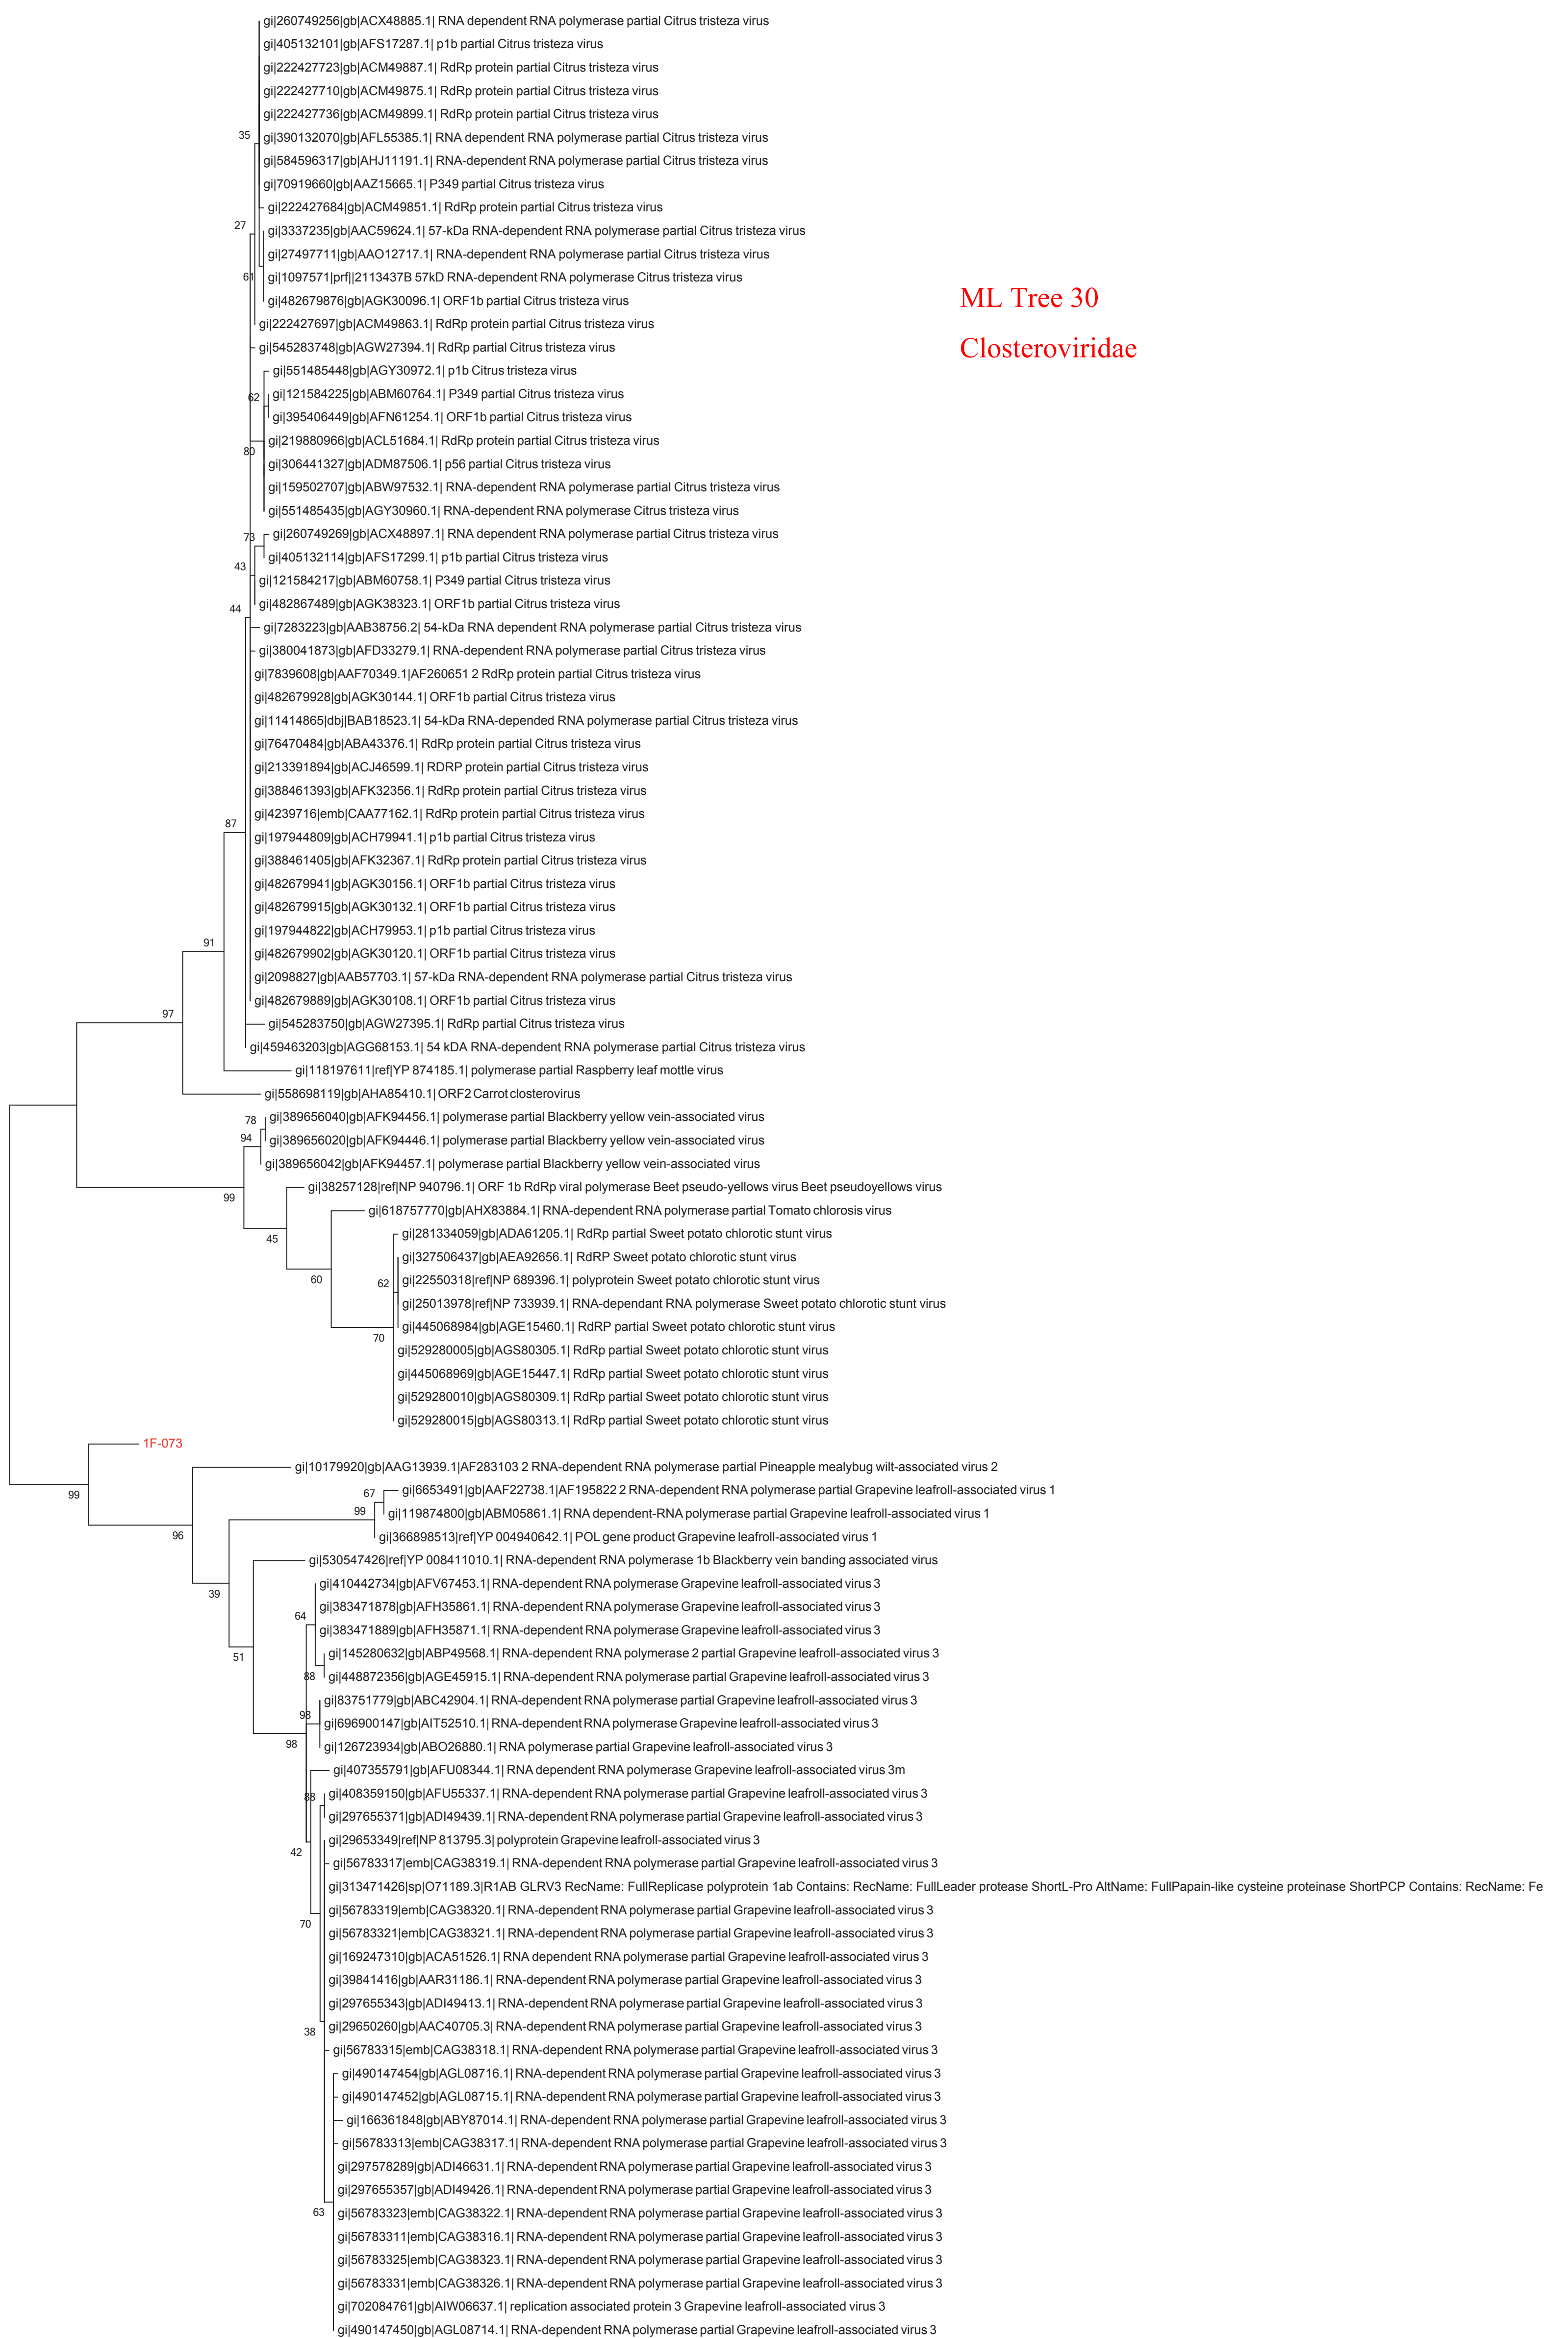

ML Tree 30  
Closteroviridae



# ML Tree 31

## Closteroviridae

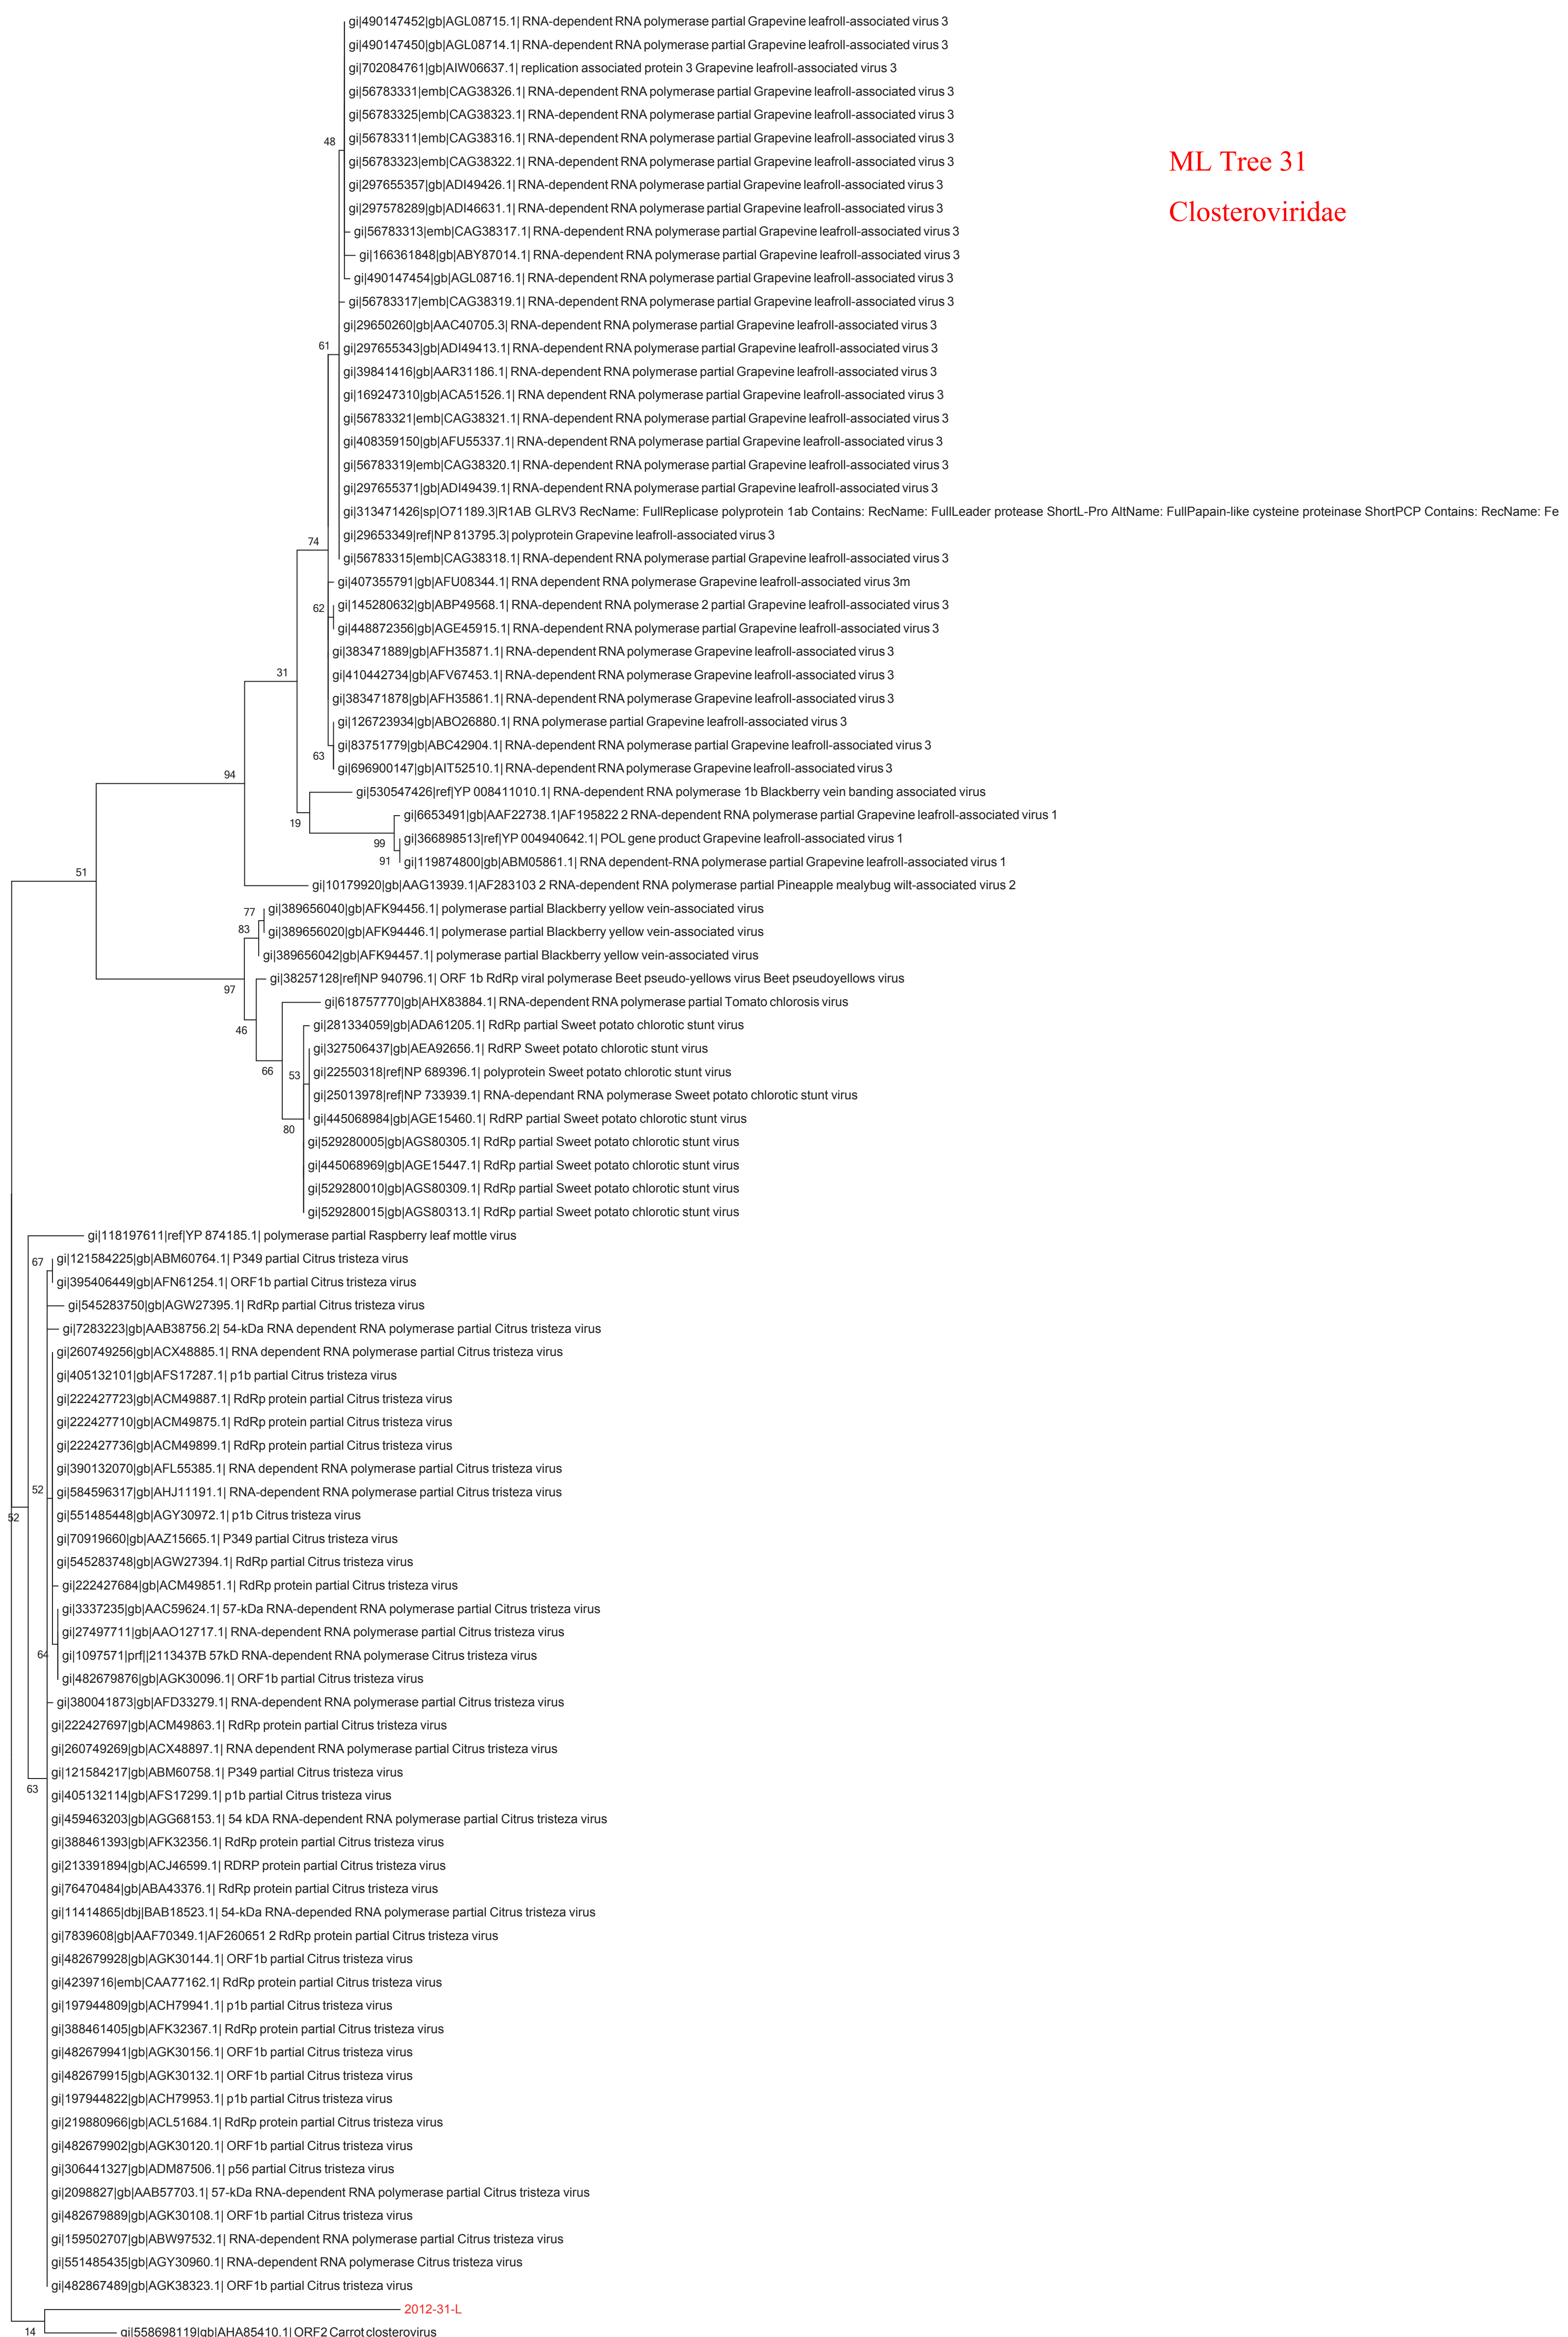



# ML Tree 32

## Closteroviridae

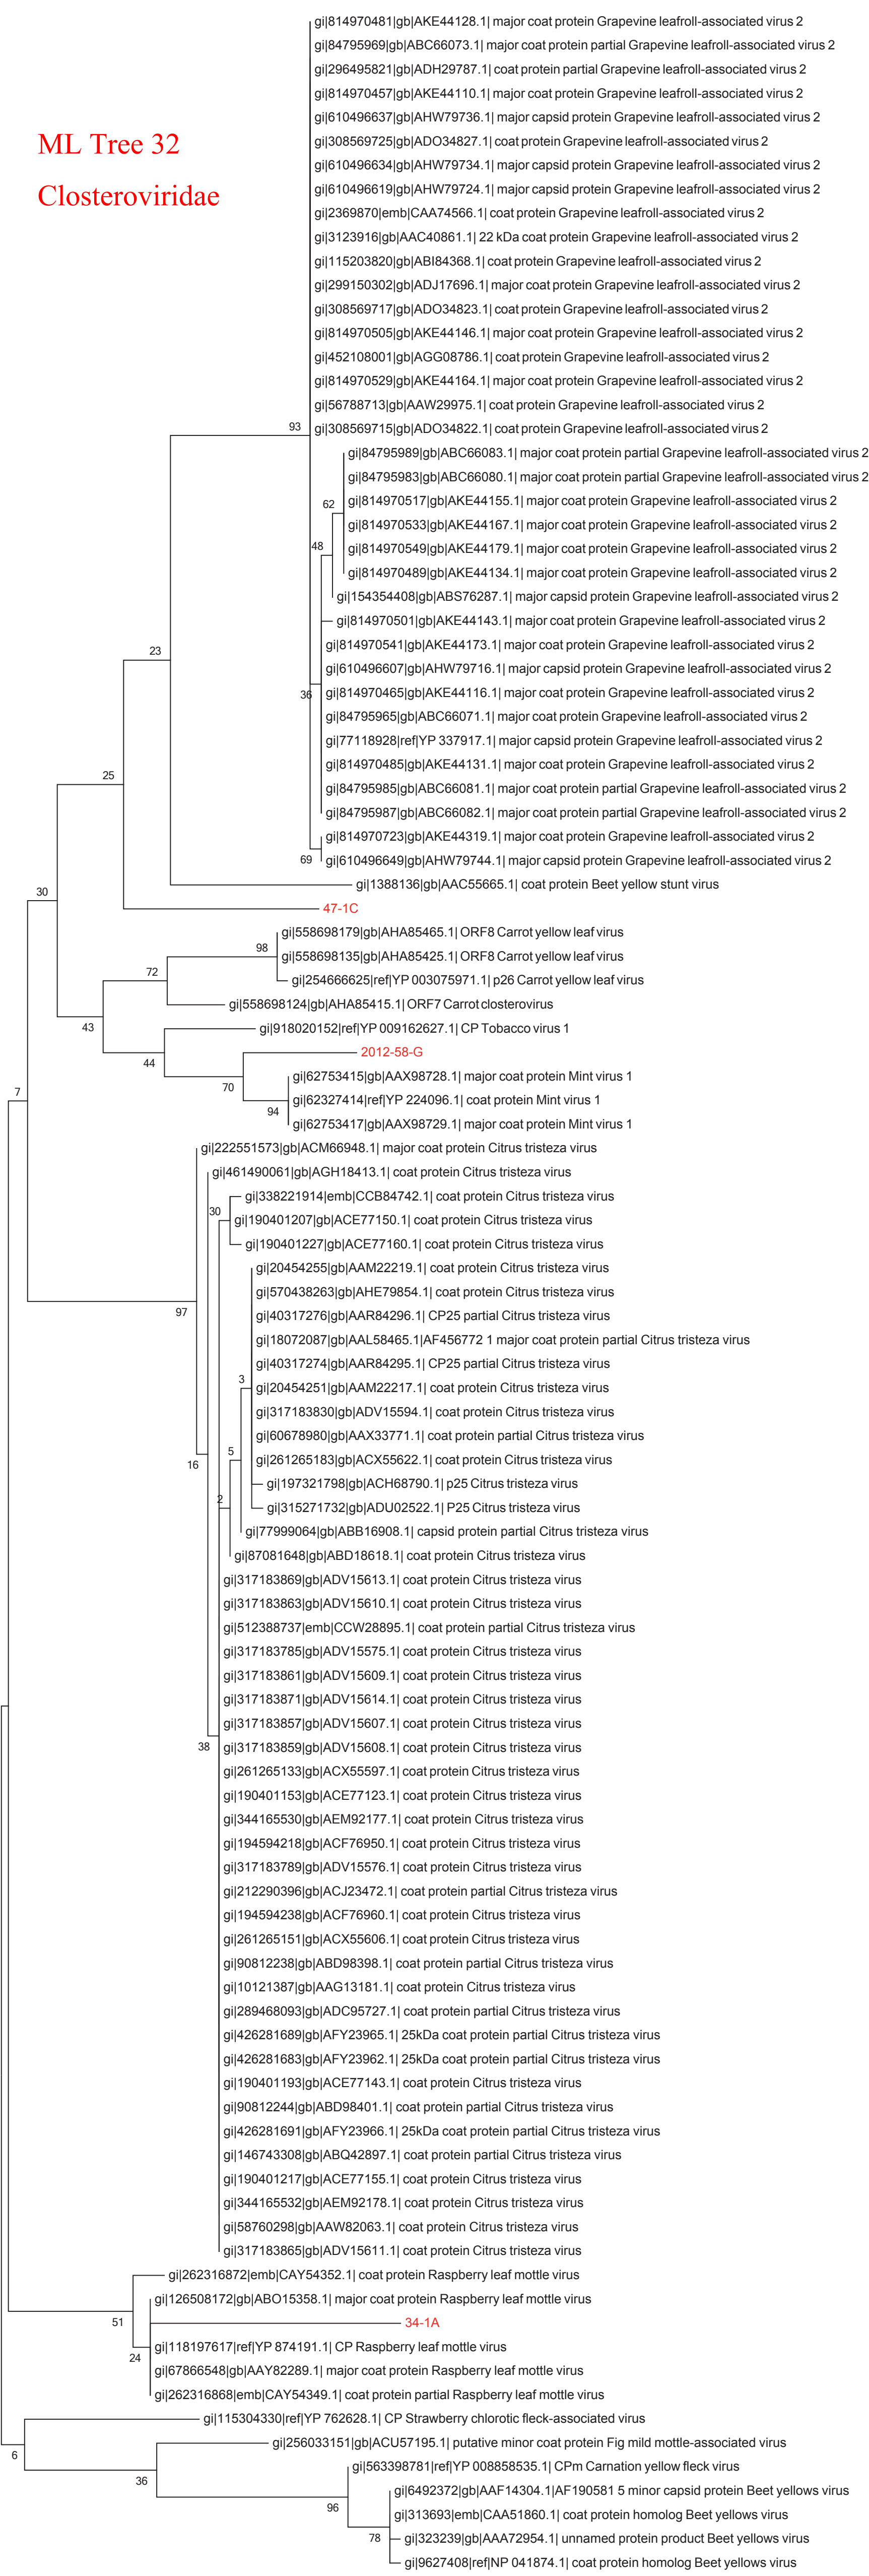

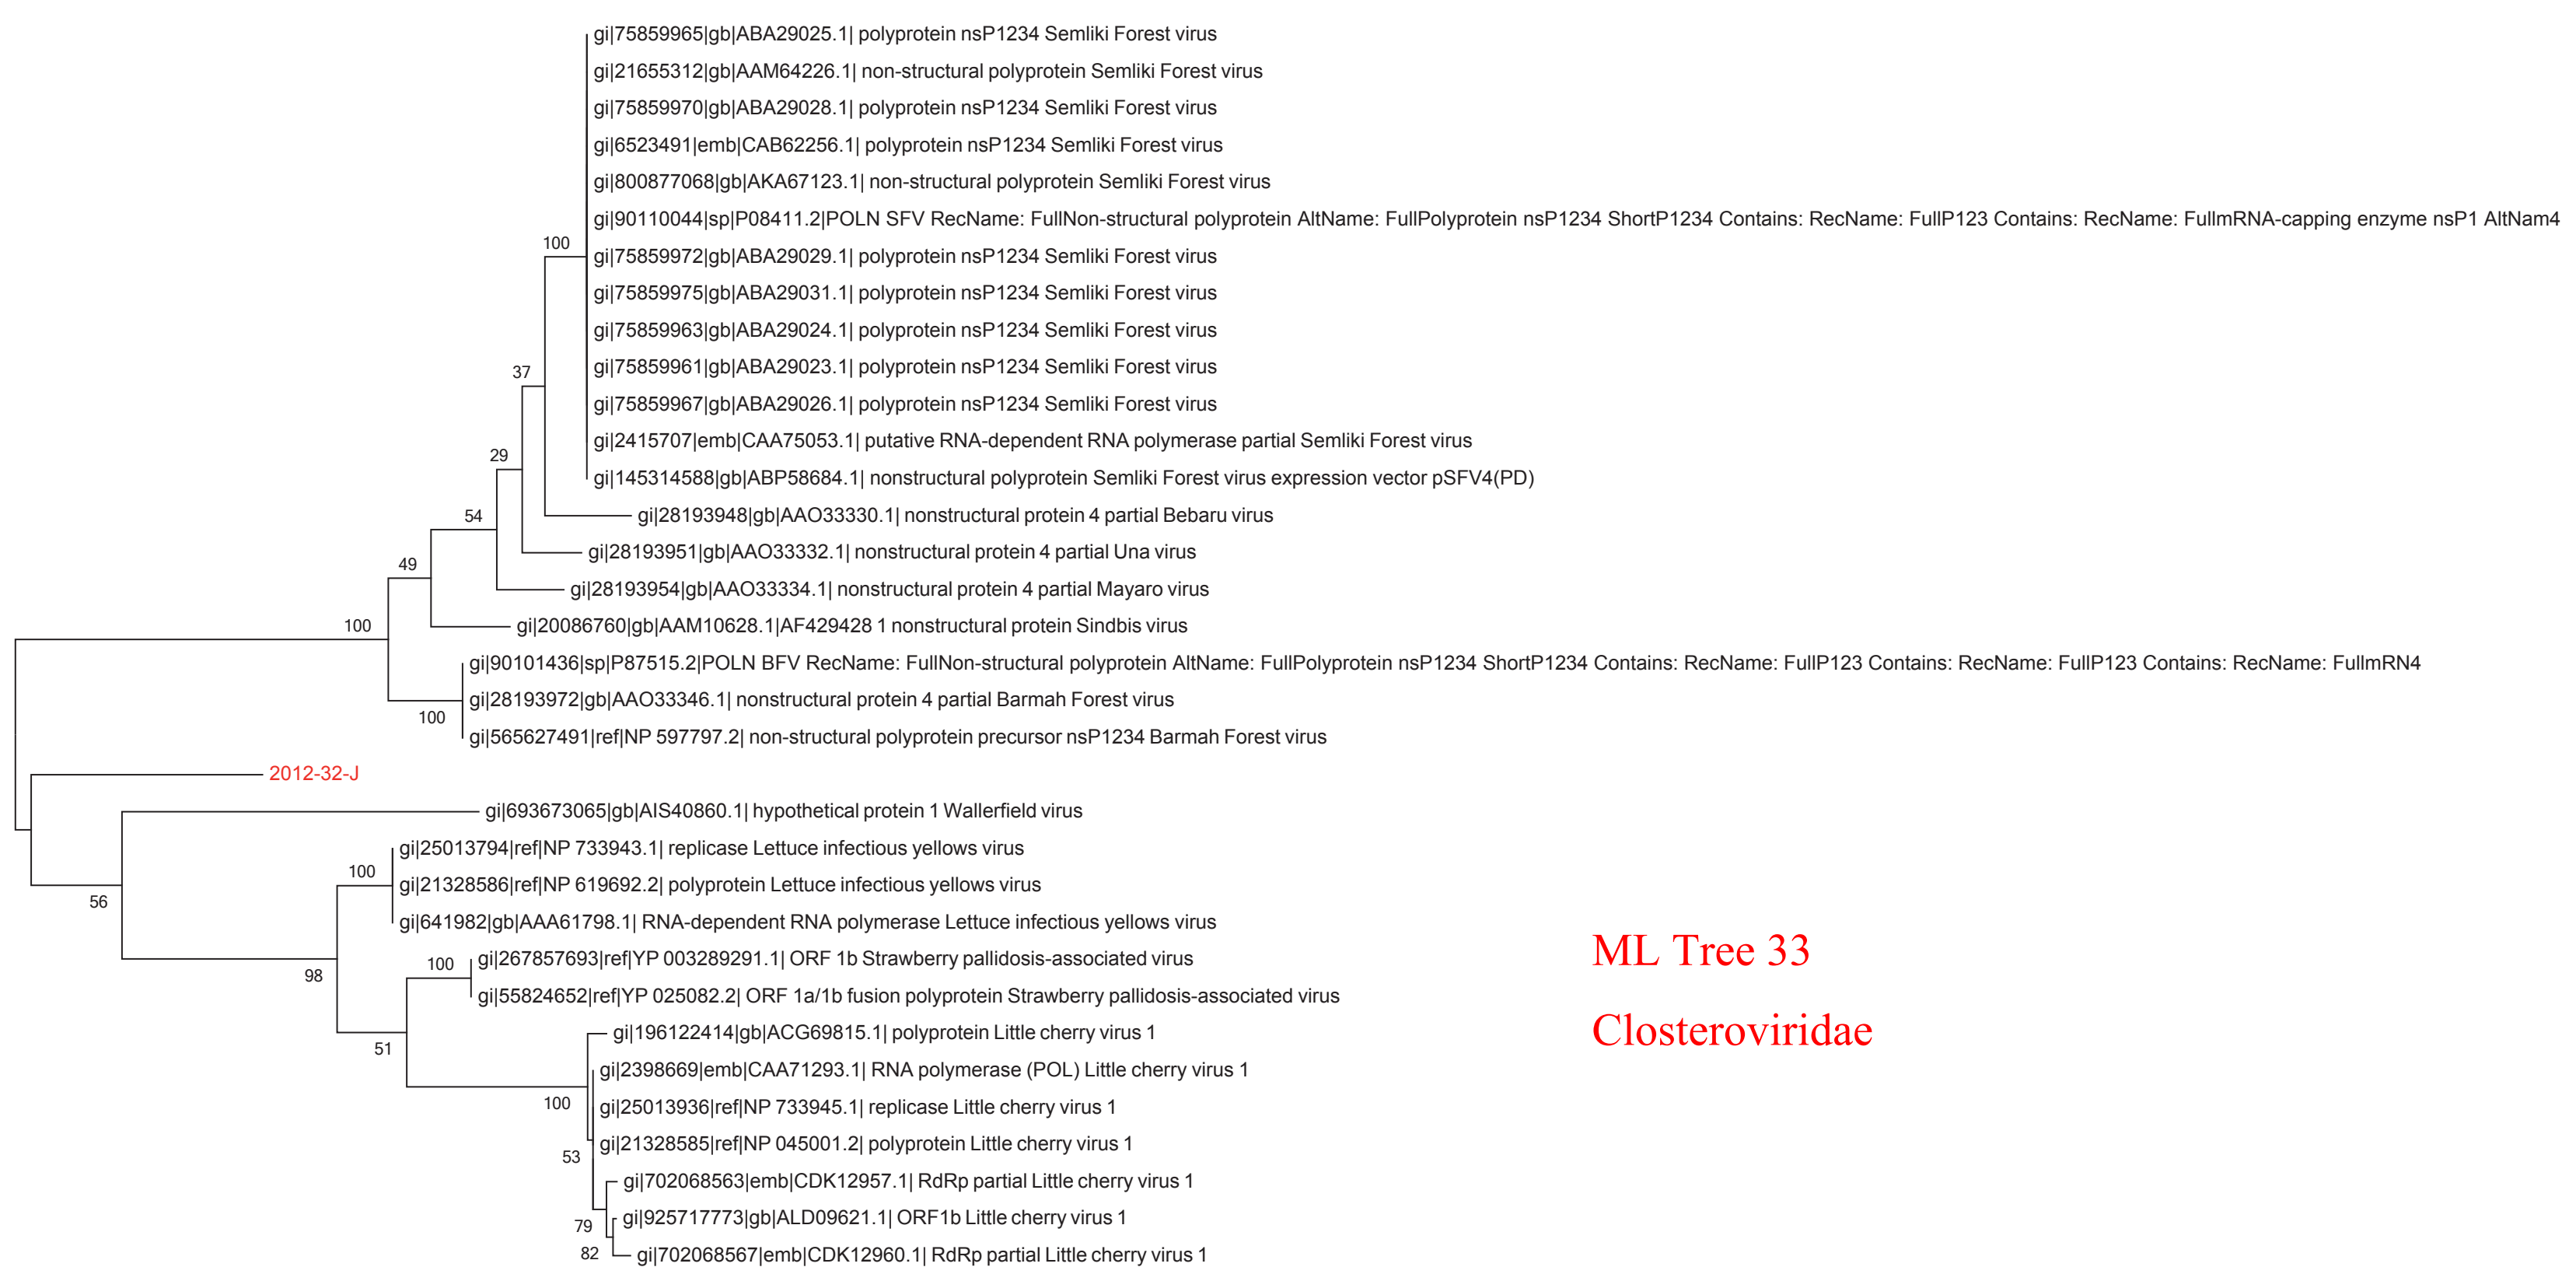

**ML Tree 33**  
**Closteroviridae**

0.2

# ML Tree 34

## Endornaviridae

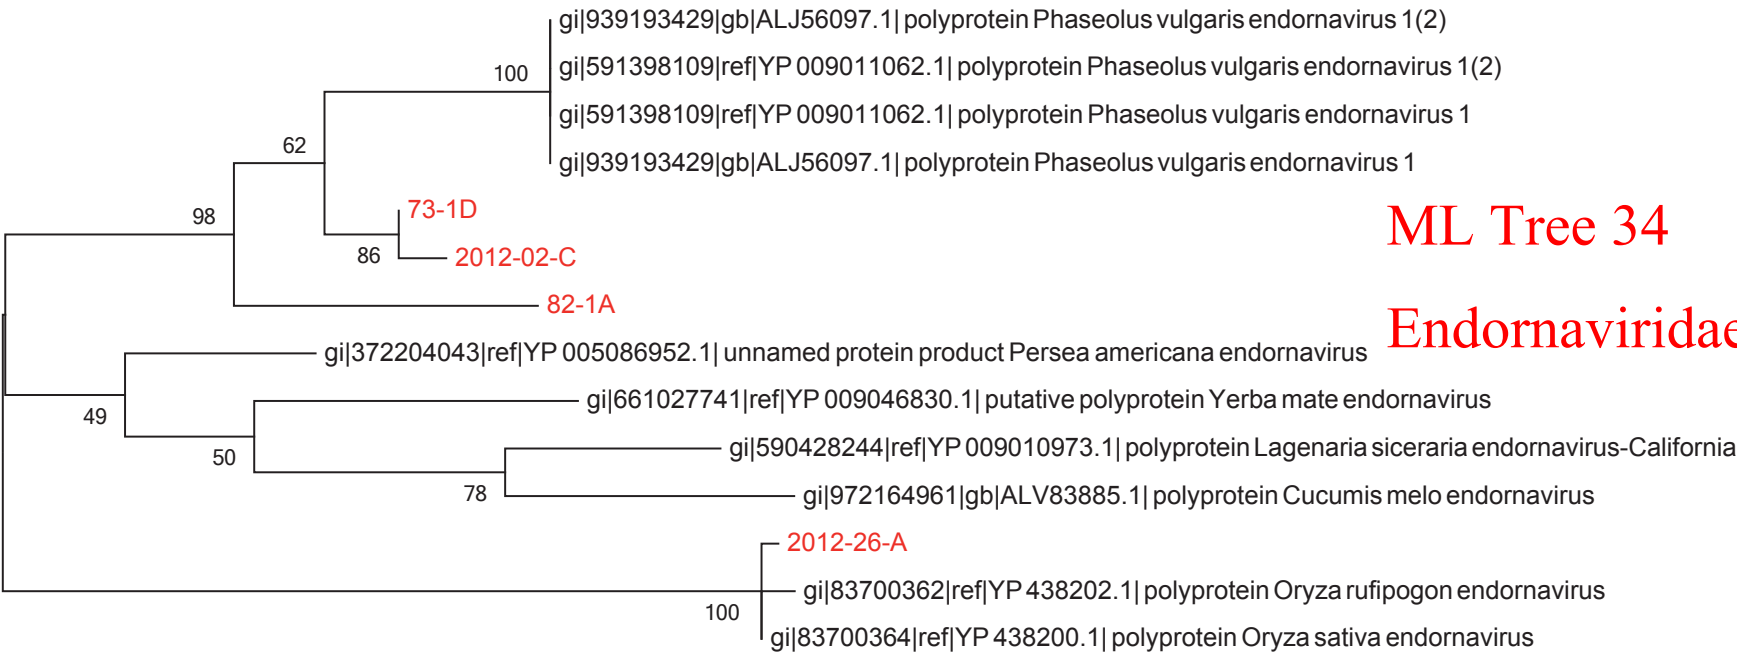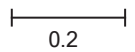



# ML Tree 35

## Endornaviridae

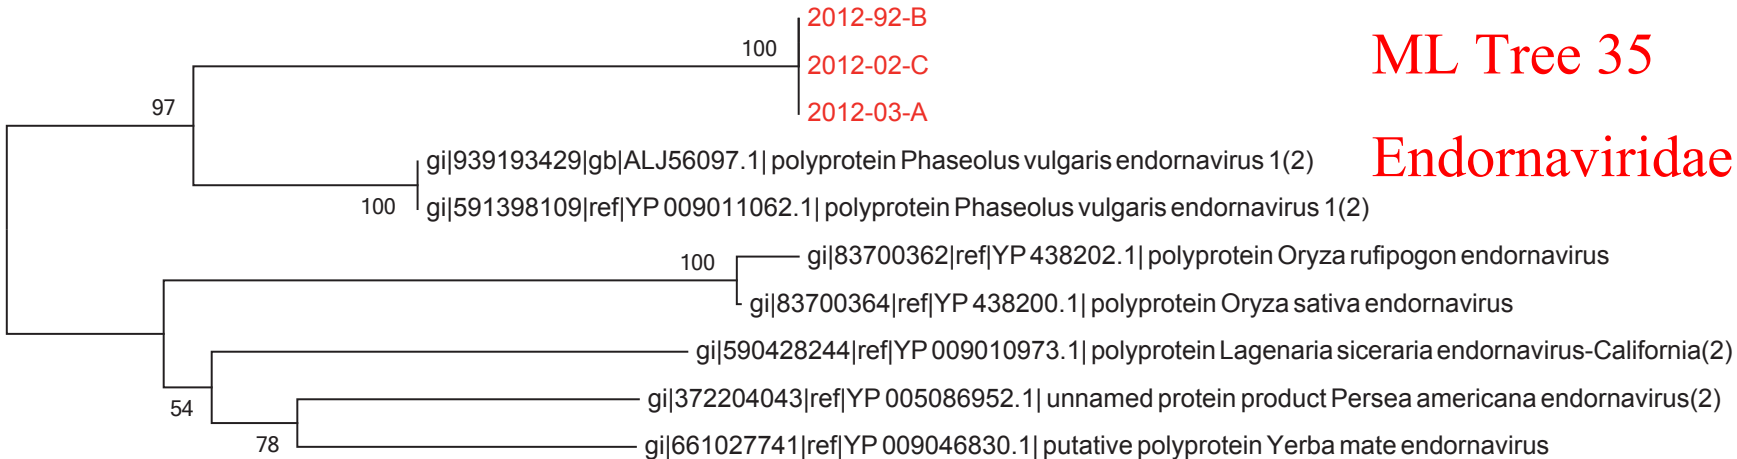

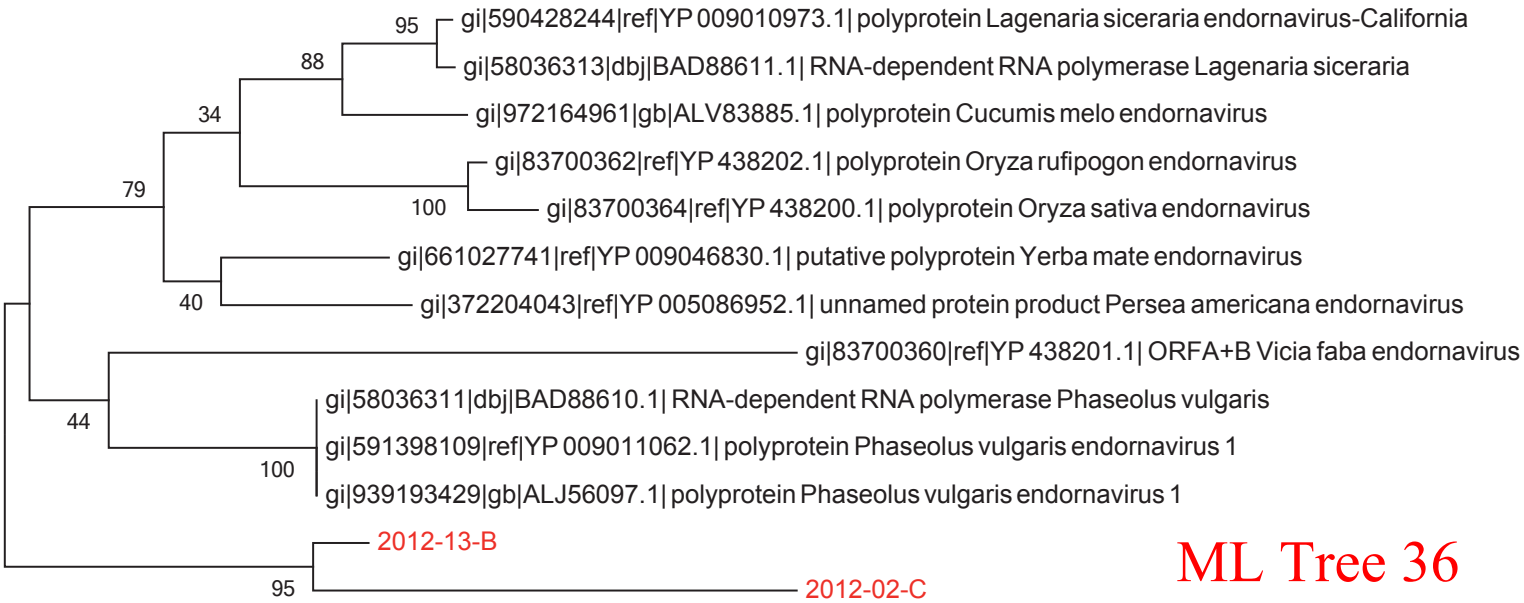

ML Tree 36

Endornaviridae

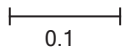

# ML Tree 37

## Endornaviridae

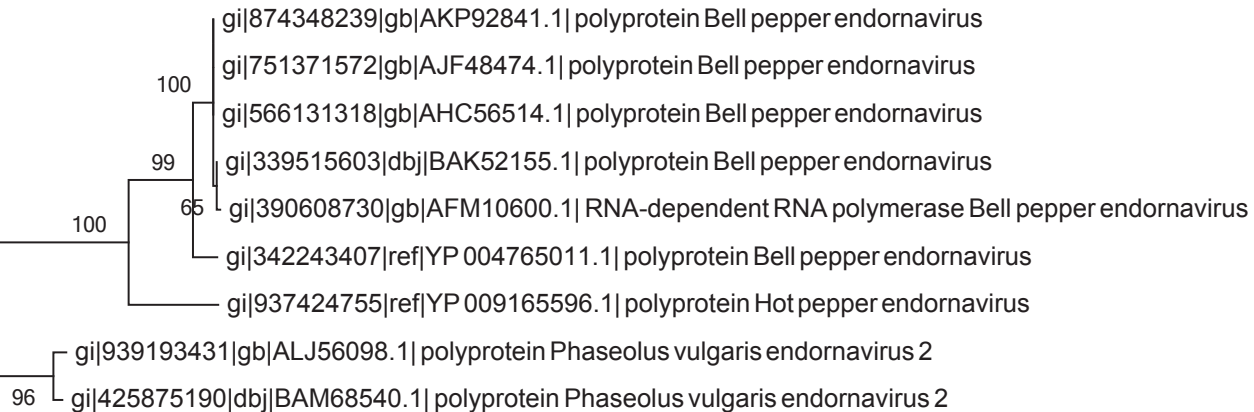

1F-011

0.2

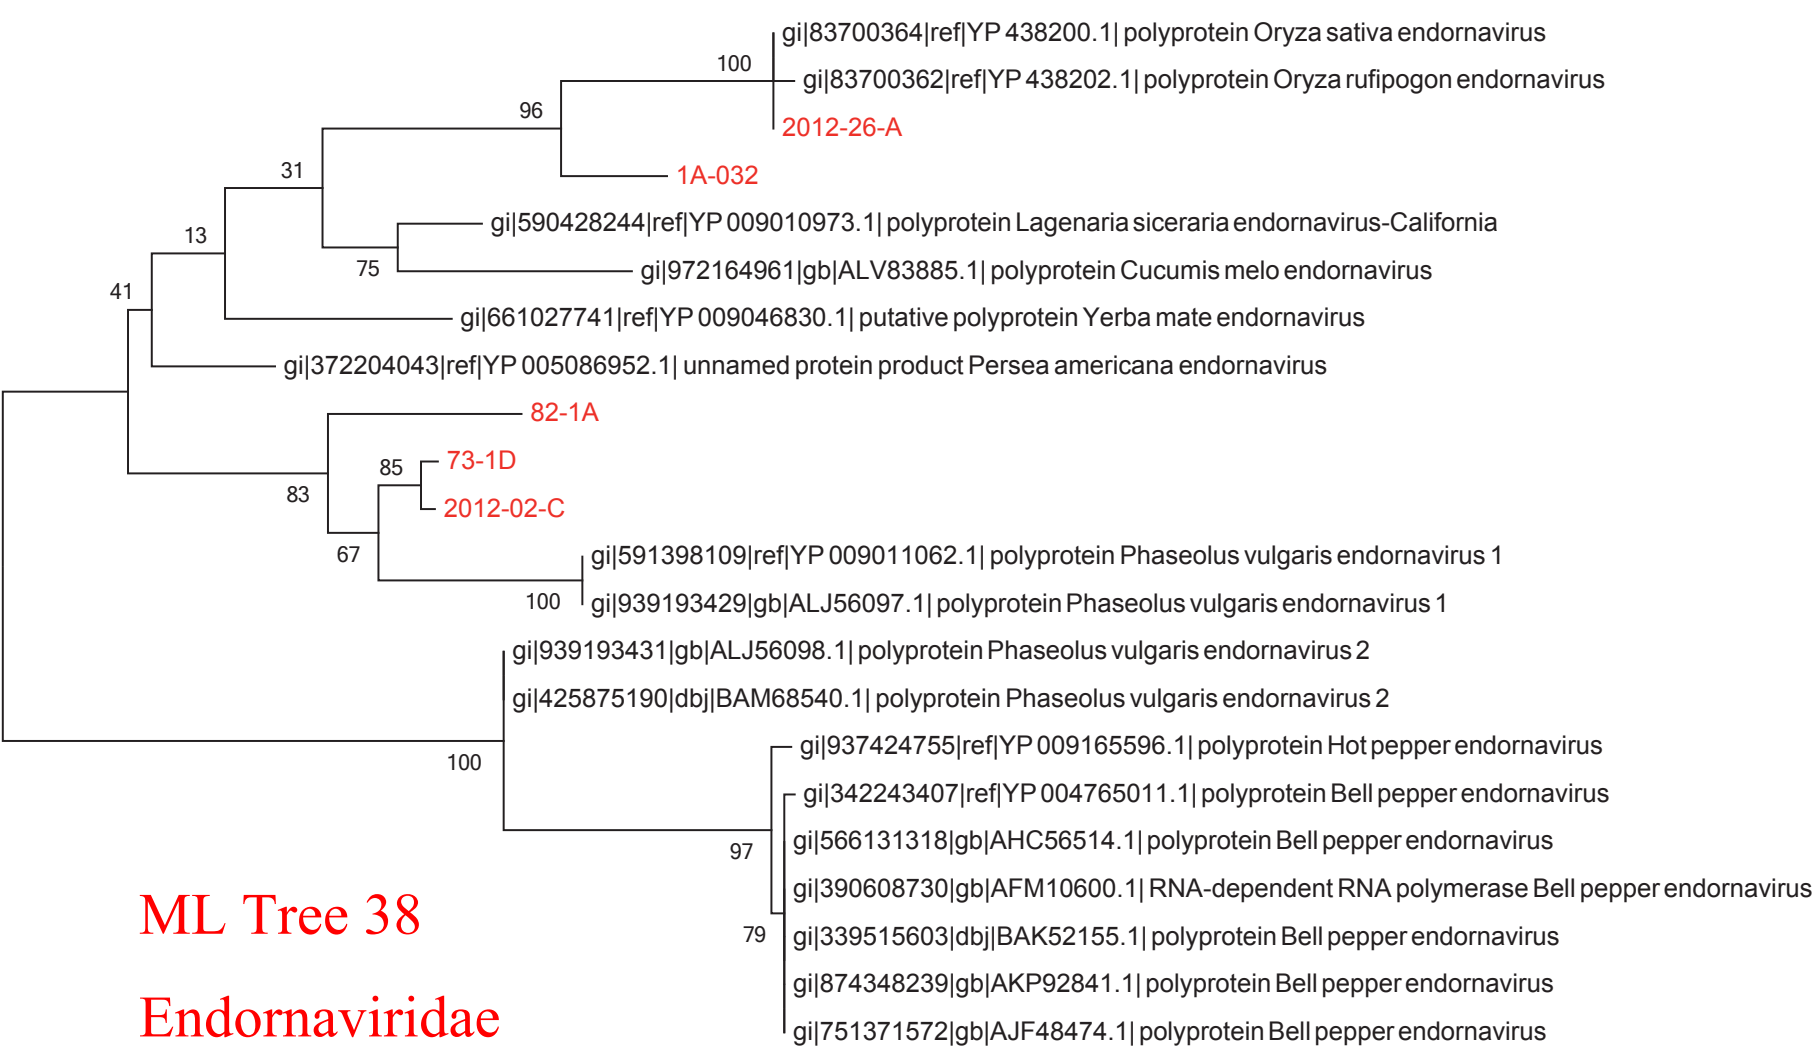

ML Tree 38  
 Endornaviridae

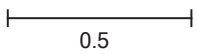

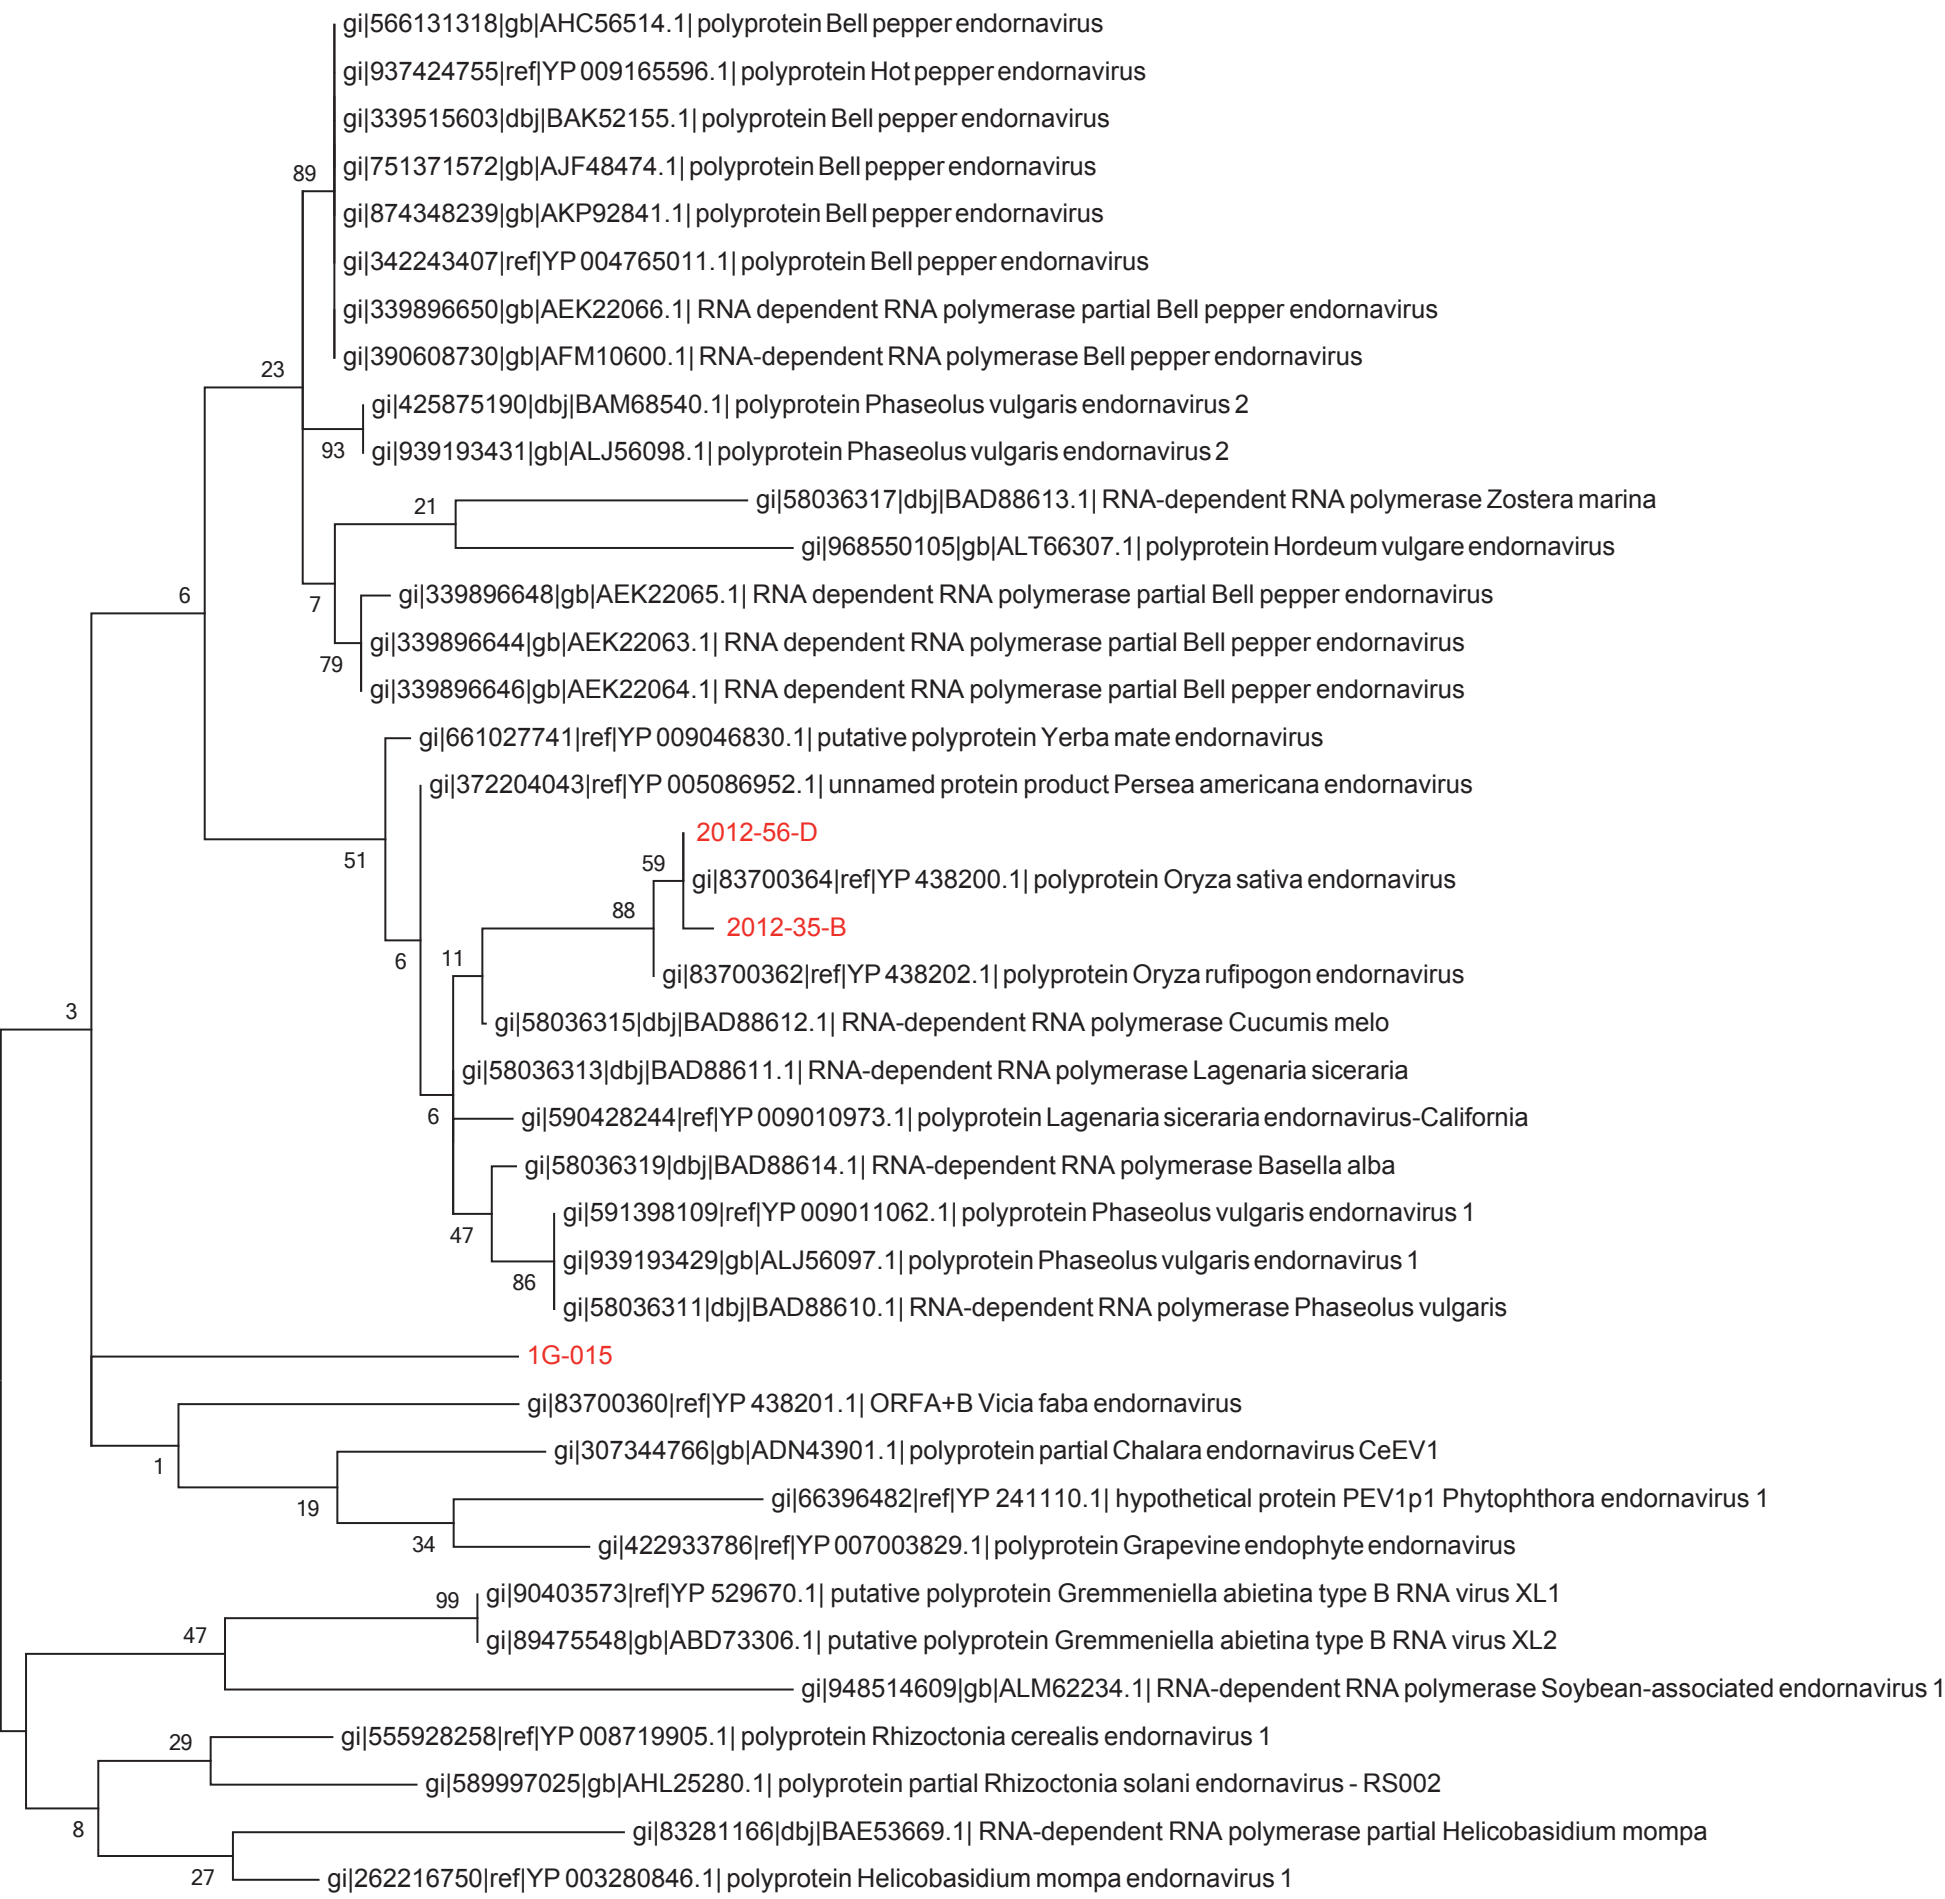

0.2



# ML Tree 39

## Endornaviridae

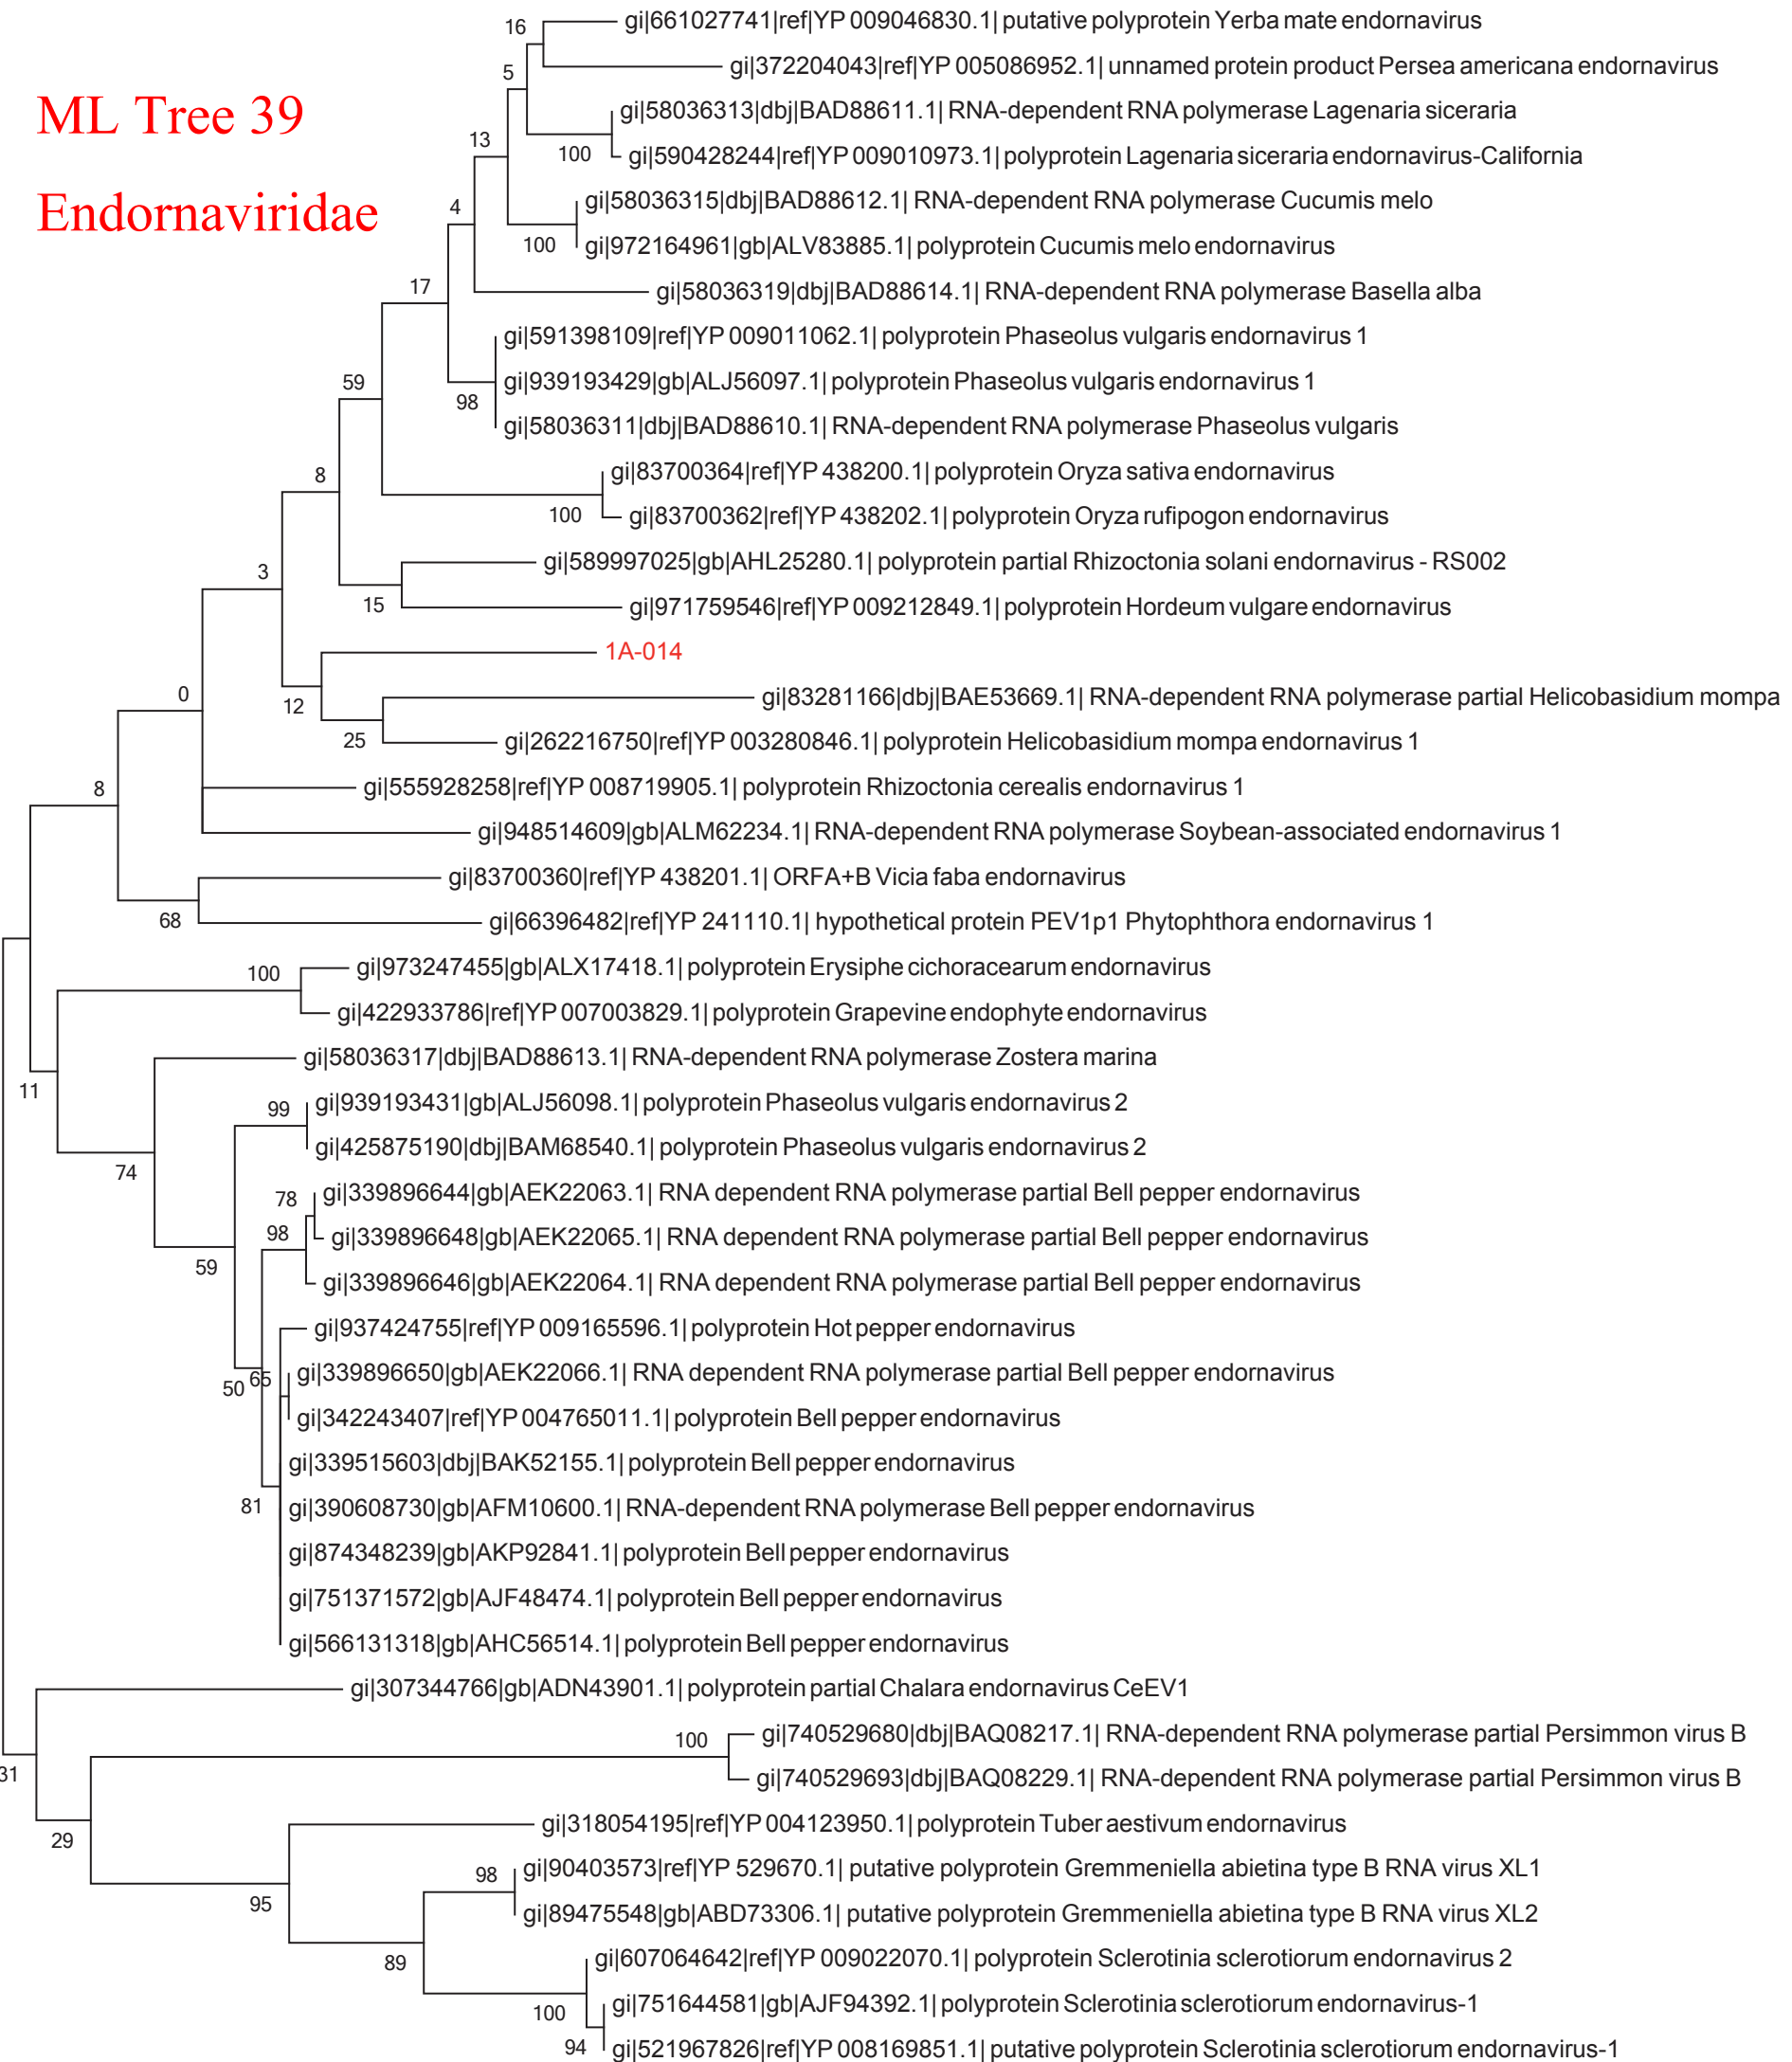

0.2

# ML Tree 41

## Endornaviridae

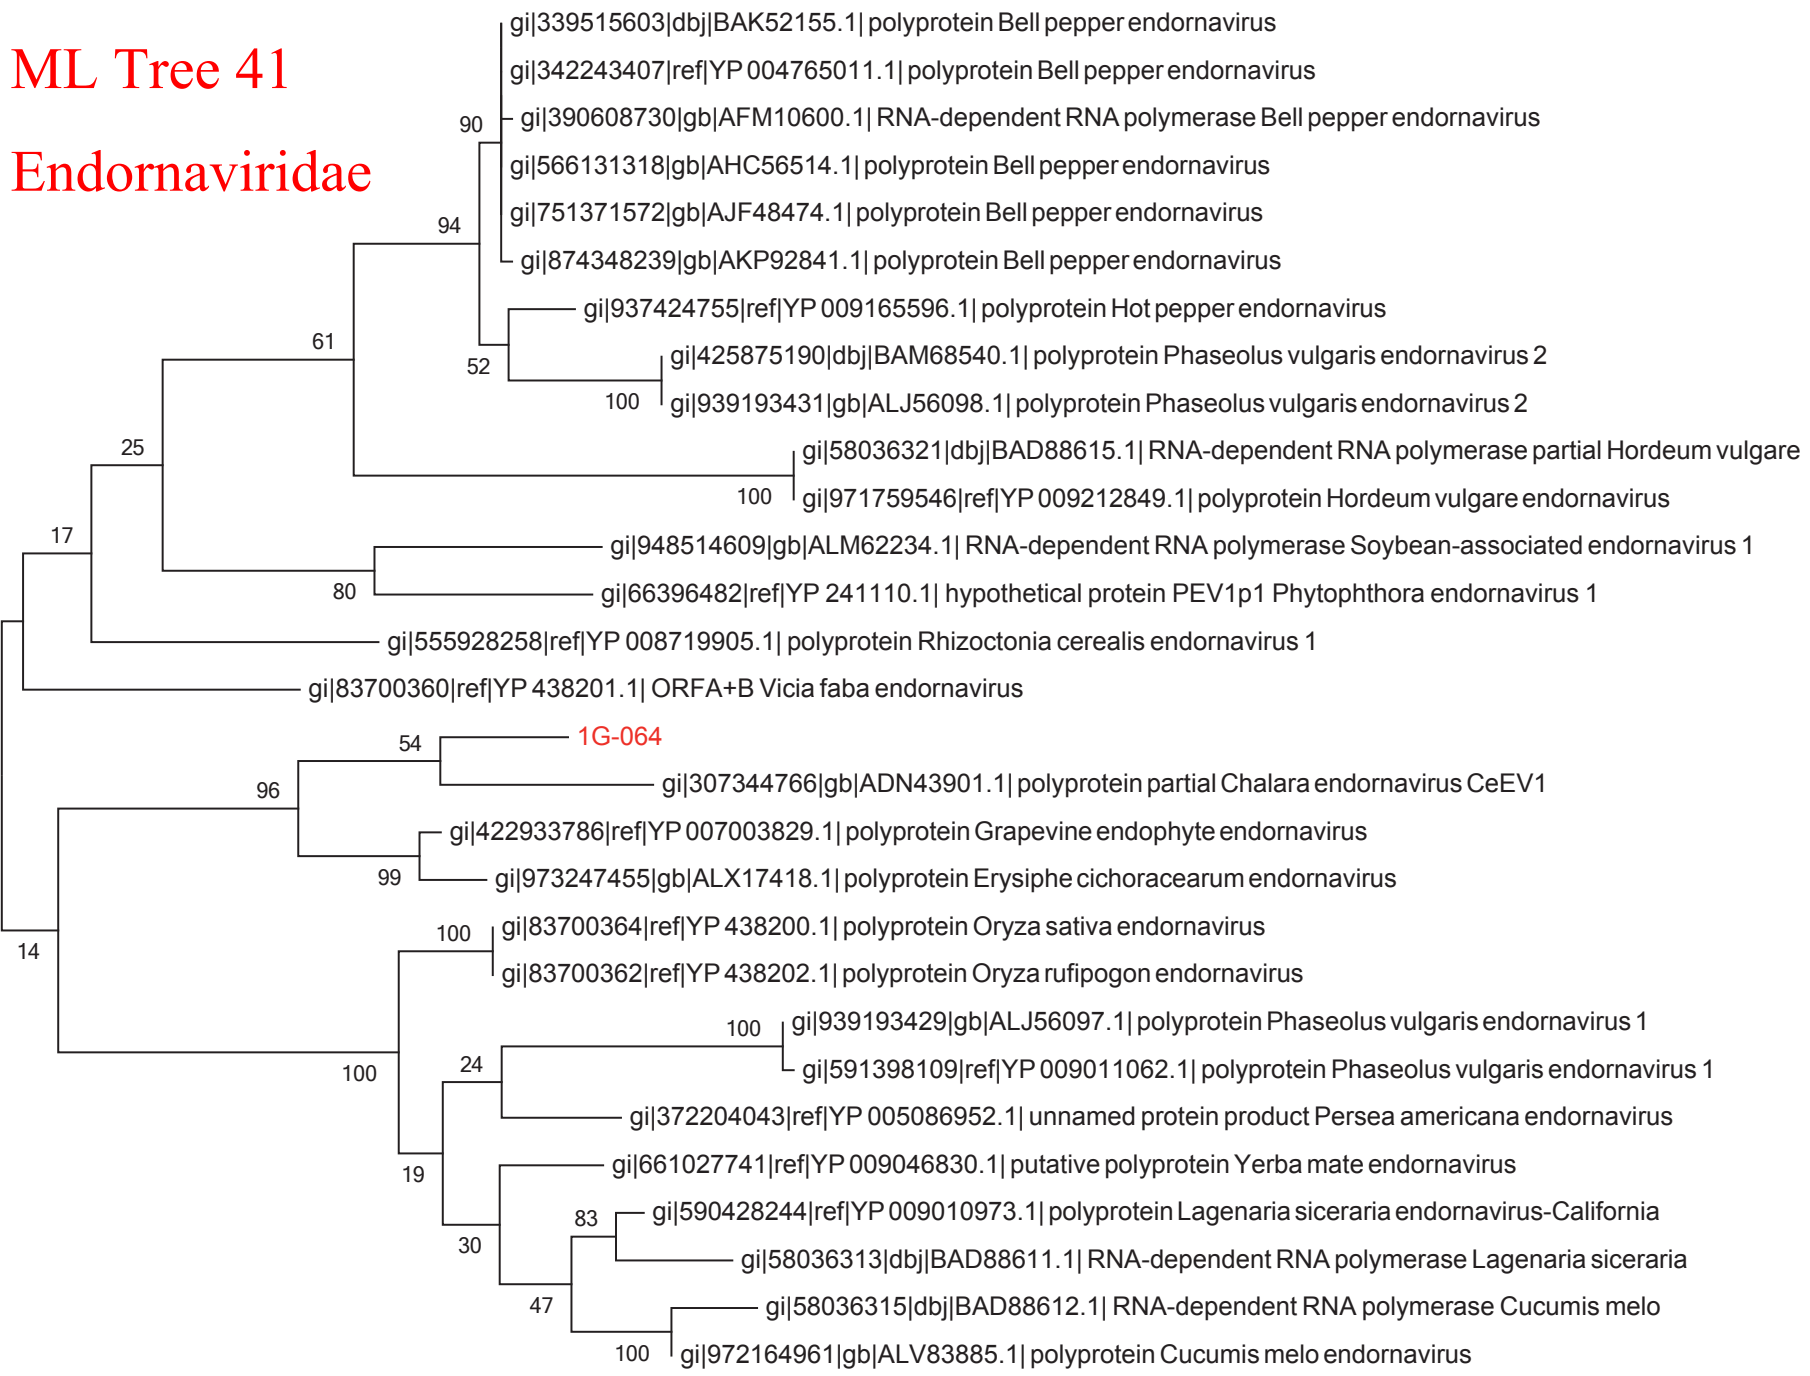

0.1

# ML Tree 42

## Geminiviridae

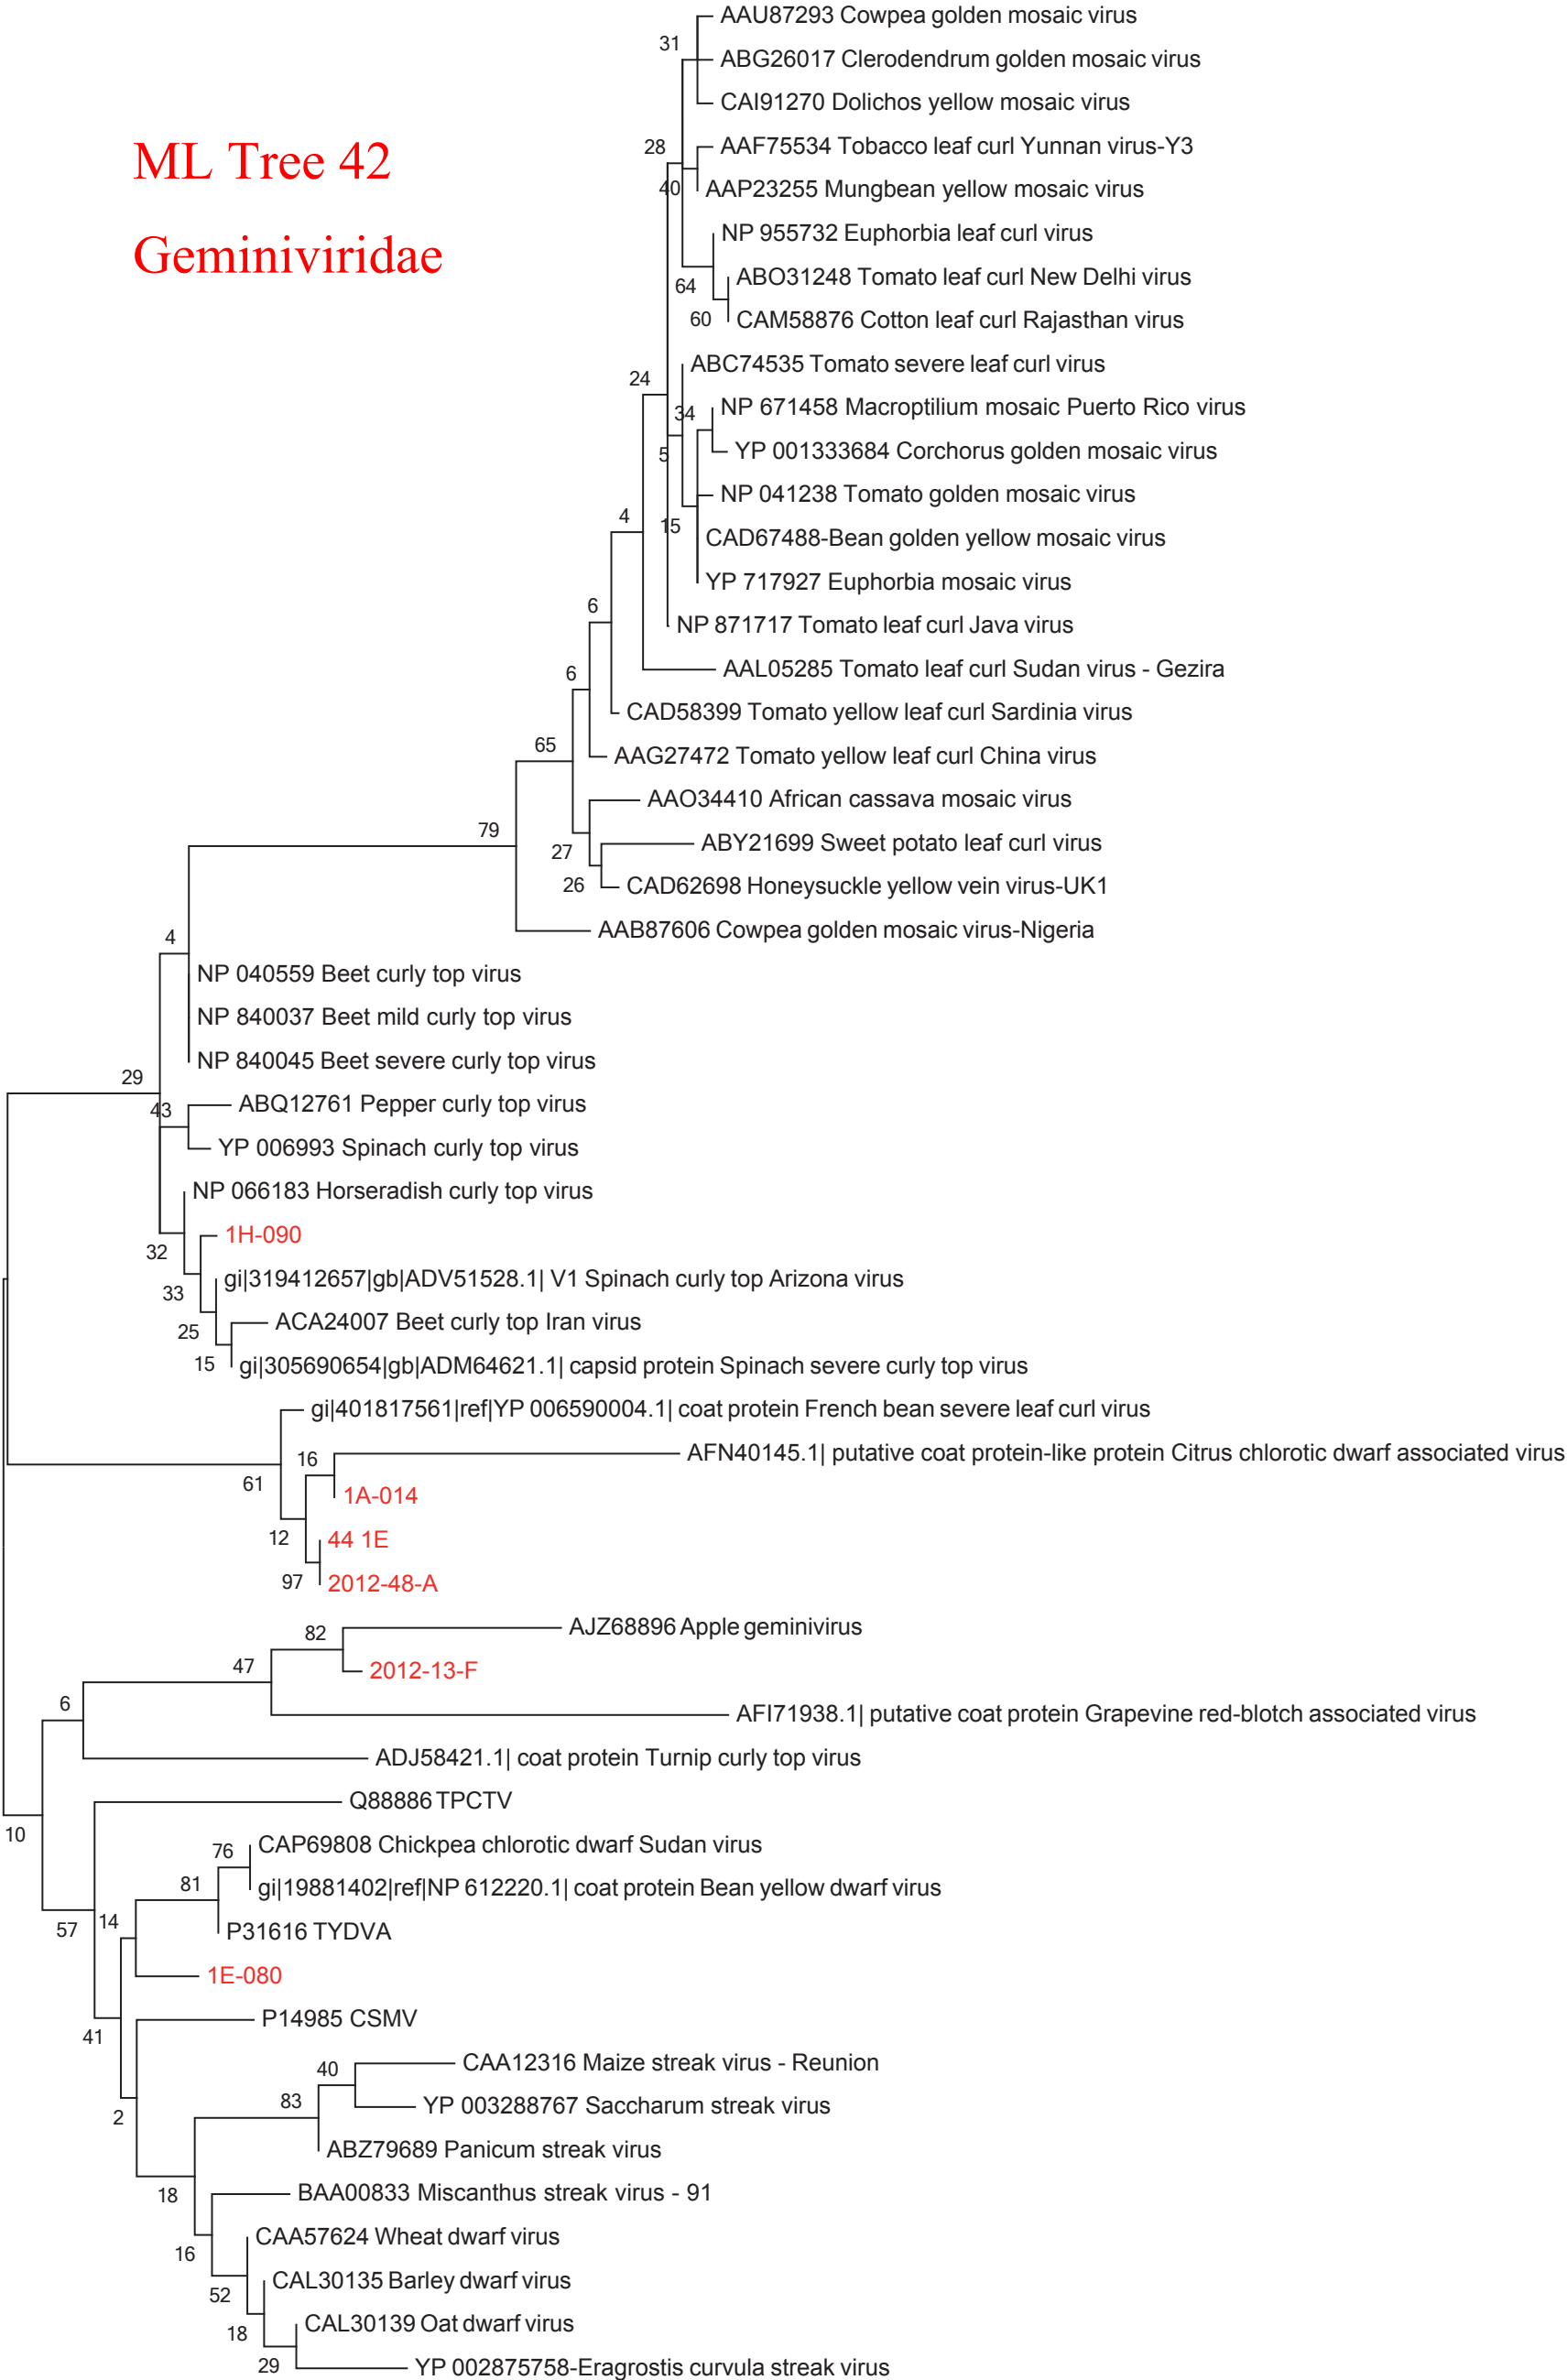

0.2

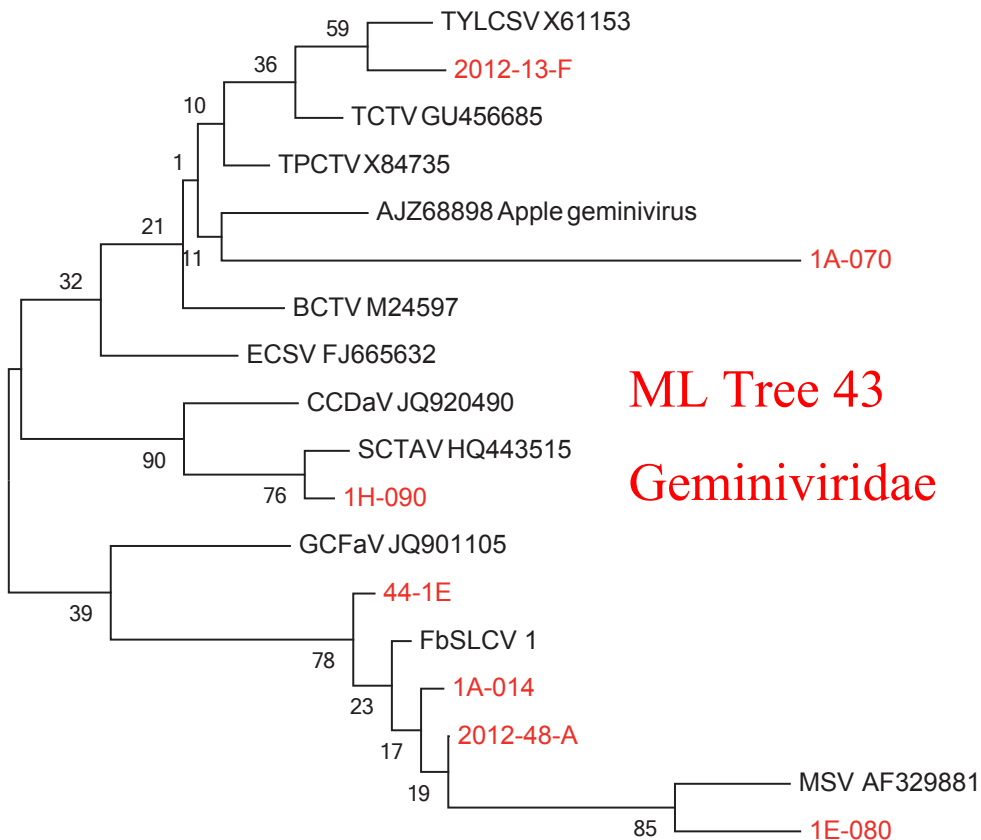



ML Tree 44  
Geminiviridae

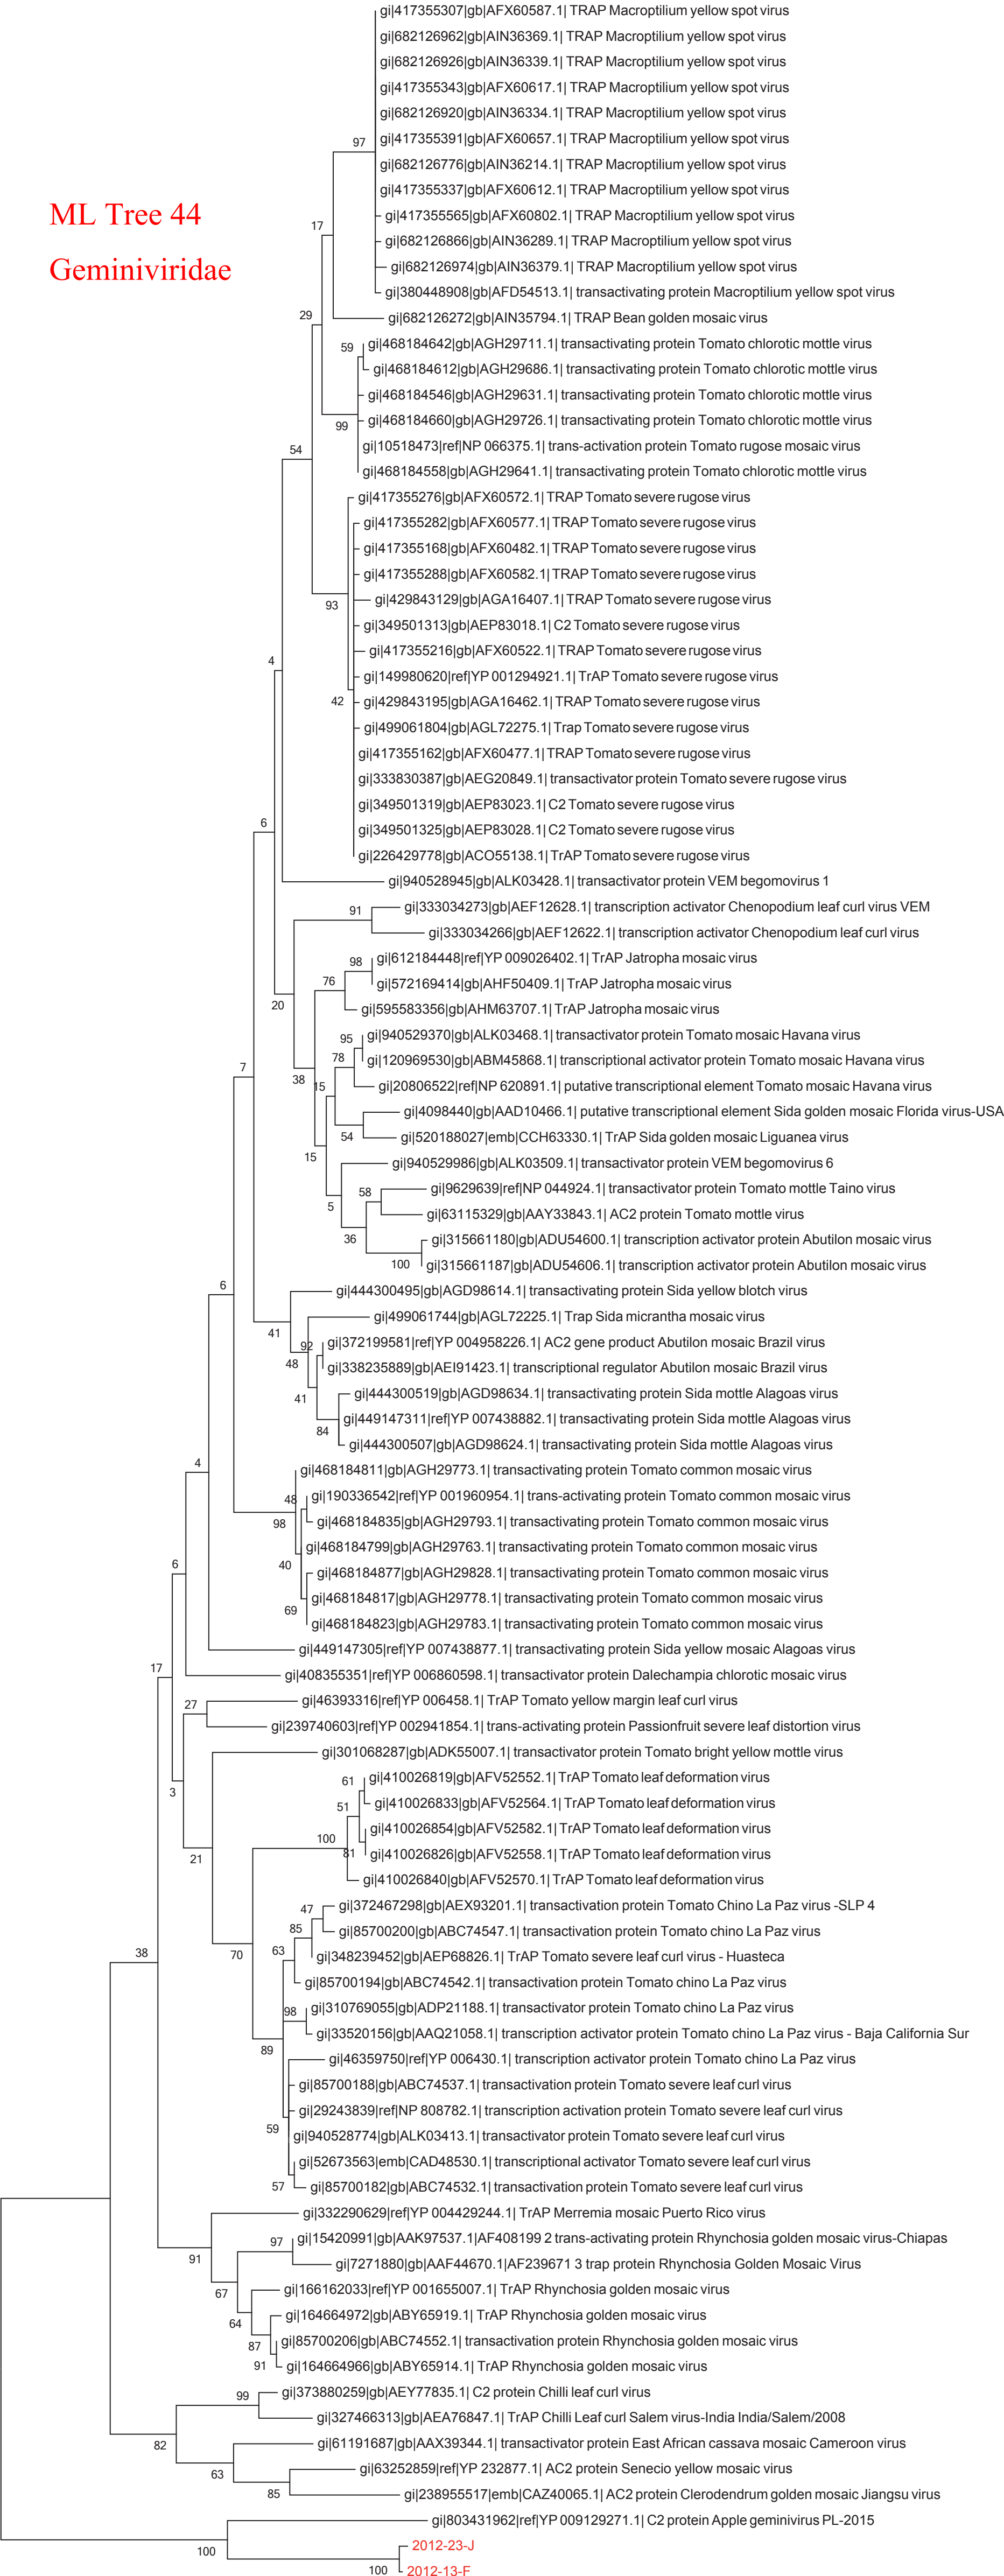

0.2

# ML Tree 45

## Geminiviridae

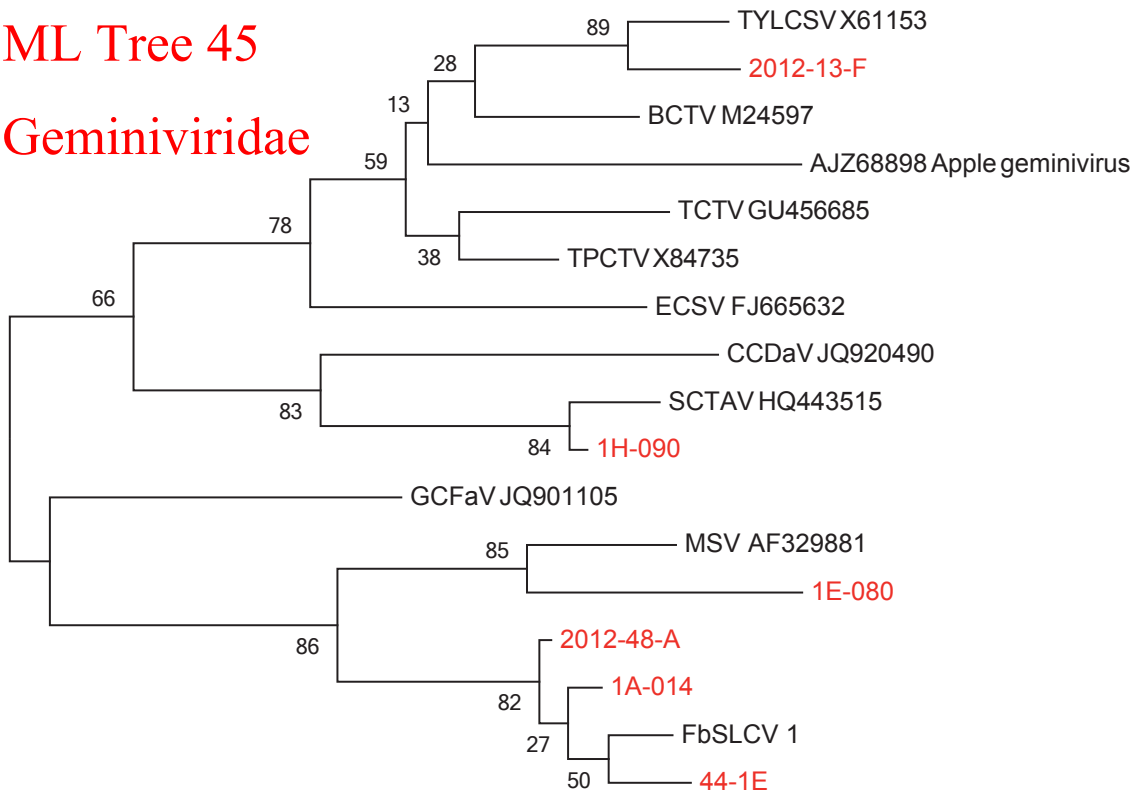

0.2

97 gi|448880175|ref|YP 667838.2| RNA-dependent RNA polymerase Chickpea chlorotic stunt virus  
68 gi|68305028|gb|AAY90038.1| RNA-dependent RNA polymerase Chickpea chlorotic stunt virus  
100 gi|336443579|gb|AEI55839.1| RNA dependent RNA polymerase Chickpea chlorotic stunt virus  
2012-32-J 1

34-1D

gi|110645394|ref|YP 667839.1| P1 protein Chickpea chlorotic stunt virus  
83 gi|336443578|gb|AEI55838.1| P1 Chickpea chlorotic stunt virus

**ML Tree 46**

**Luteoviridae**

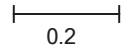



ML Tree 47  
Luteoviridae

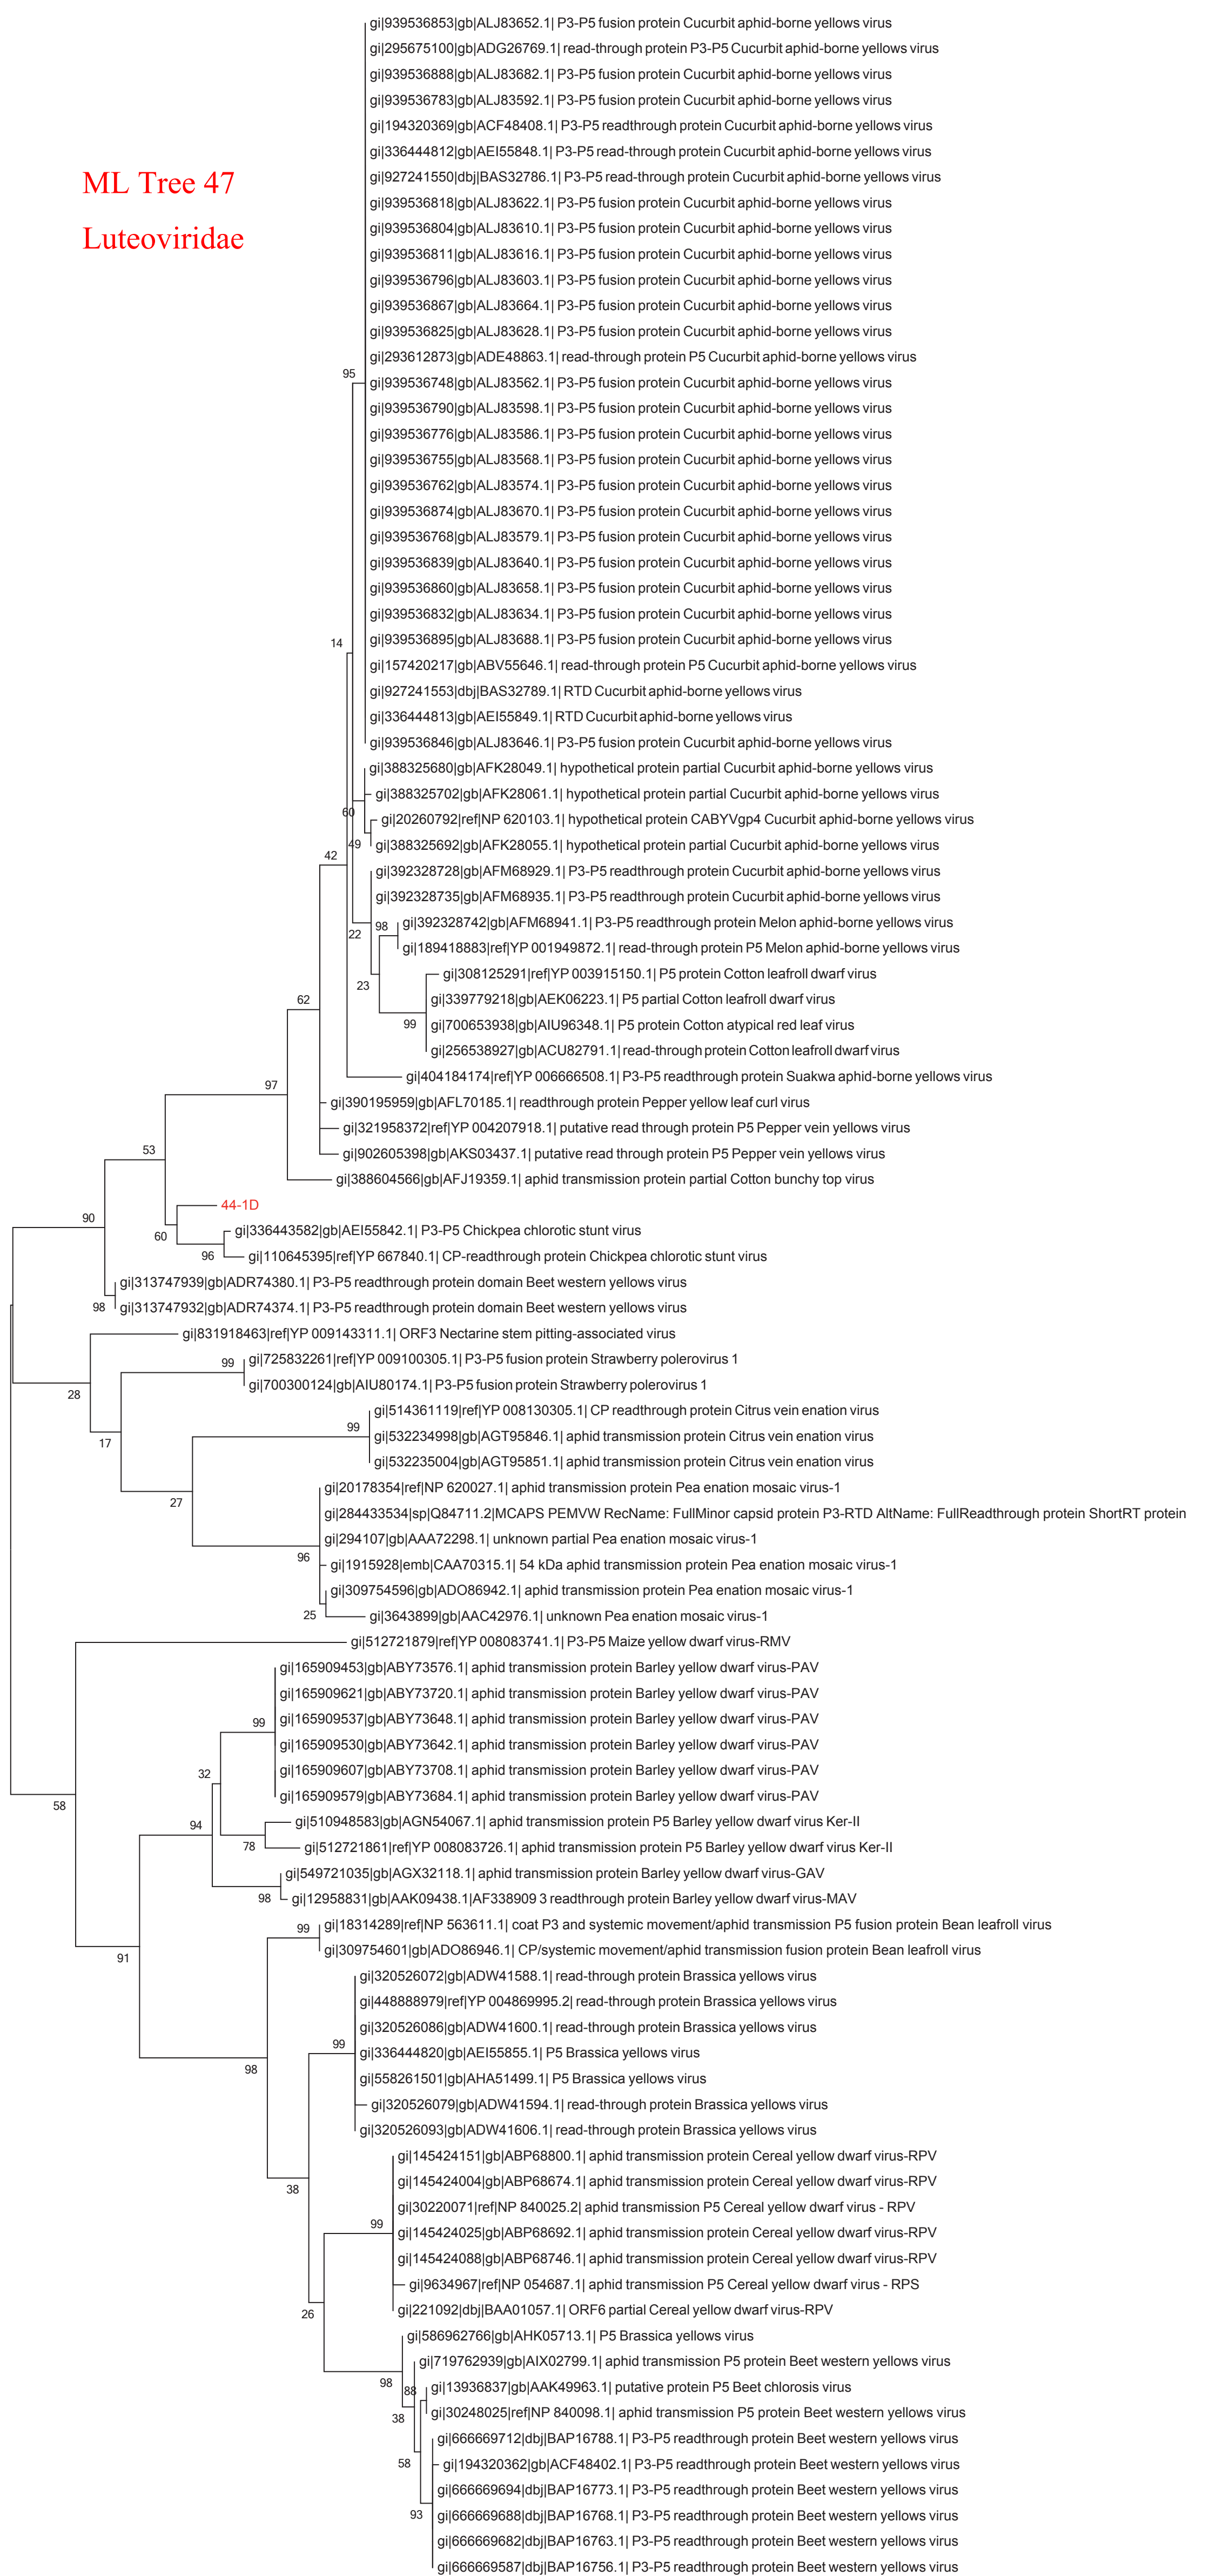

0.2



ML Tree 48  
Luteoviridae

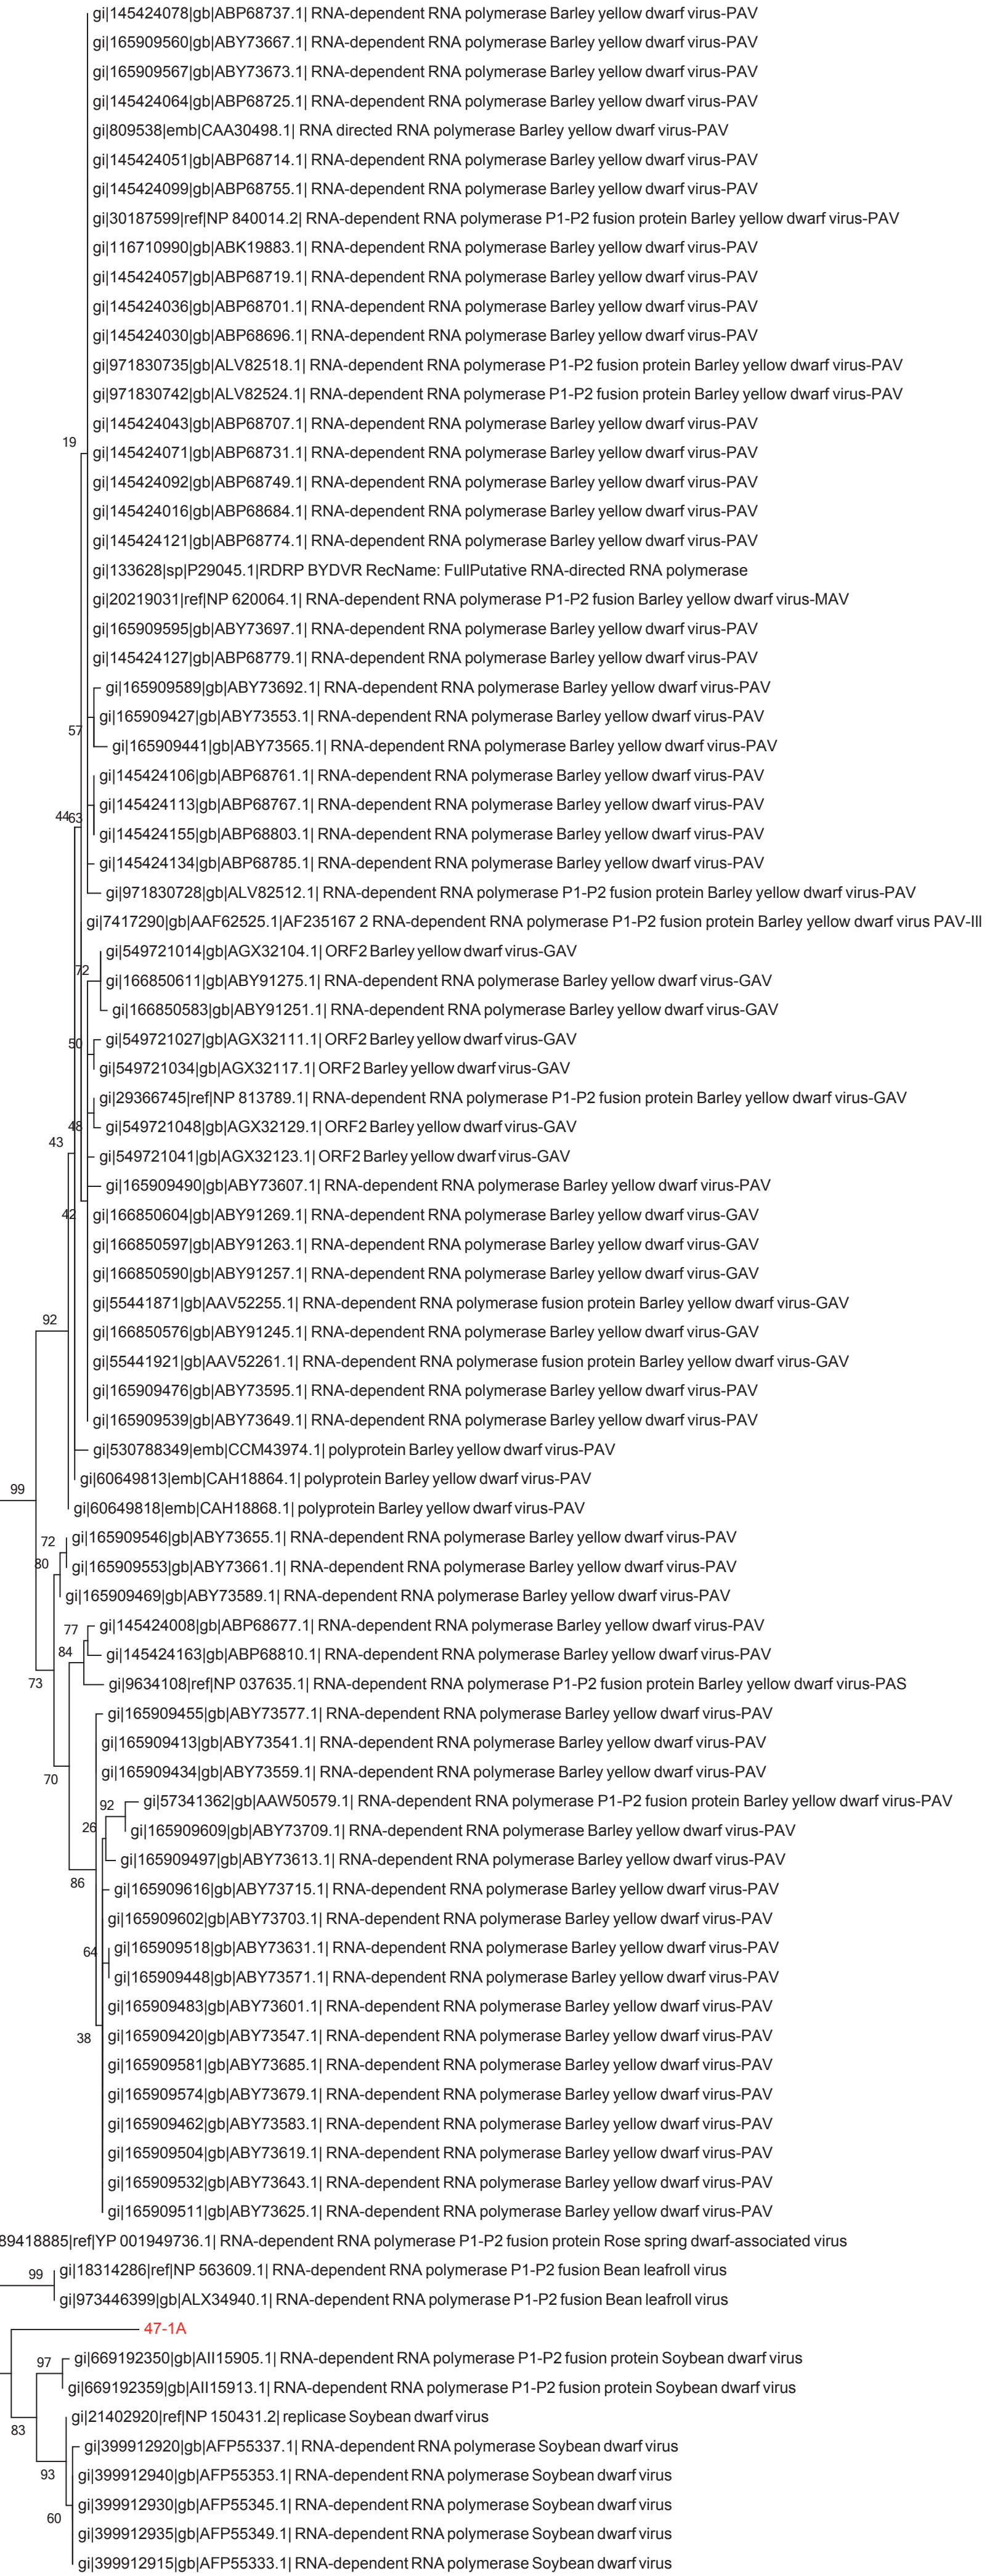

0.2

ML Tree 49  
Luteoviridae

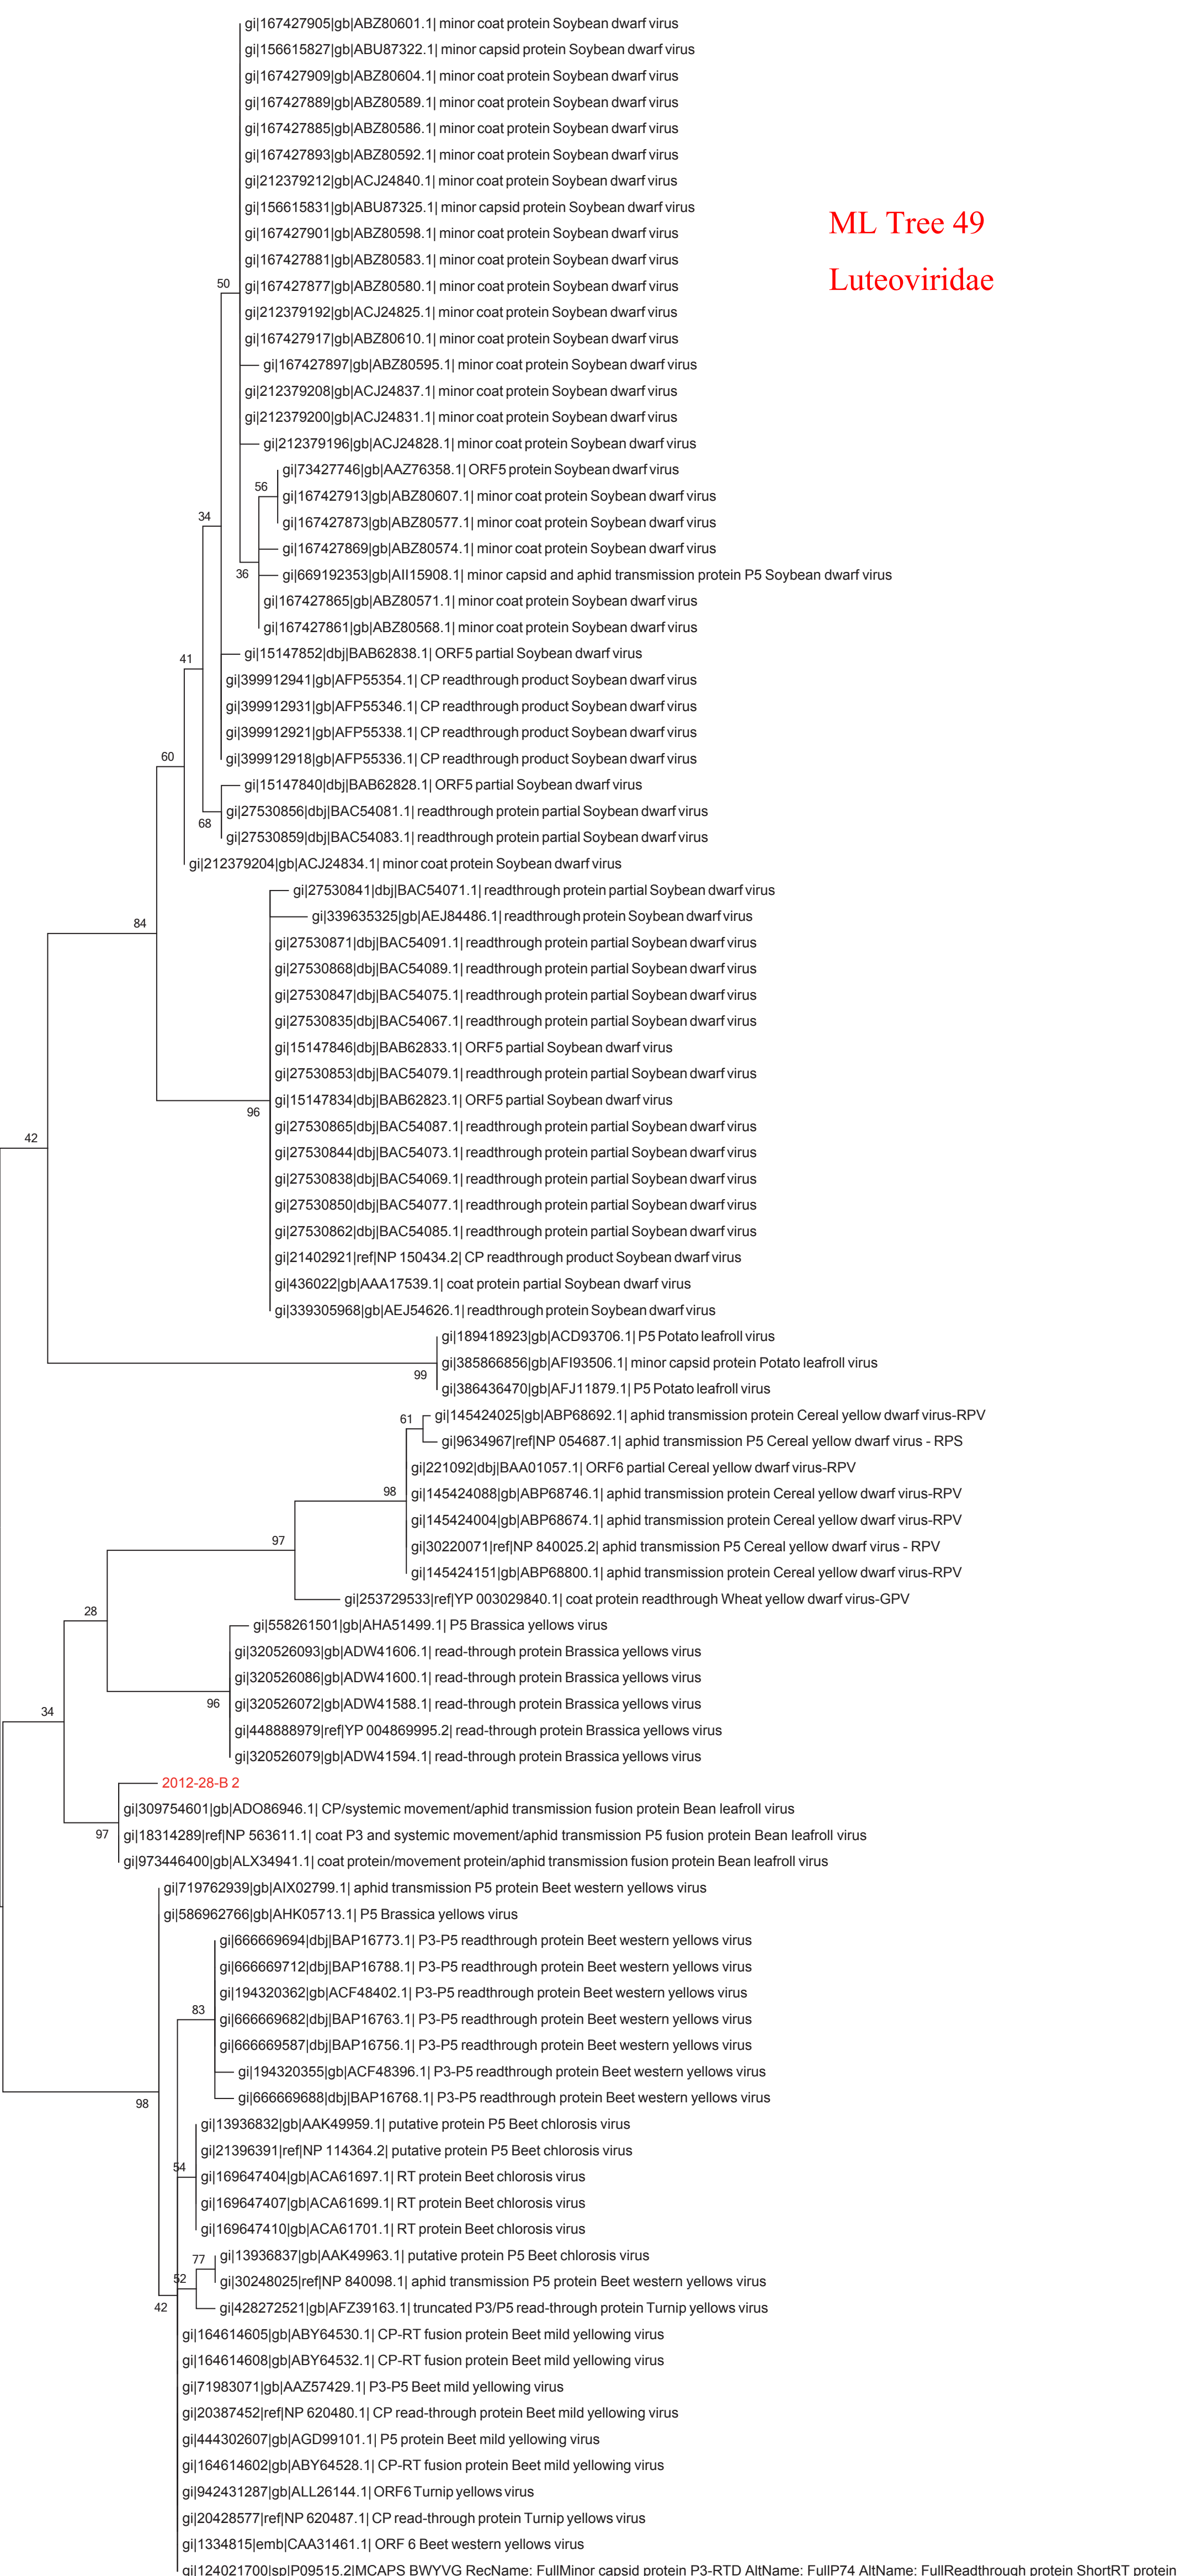

0.05



# ML Tree 50

## Luteoviridae

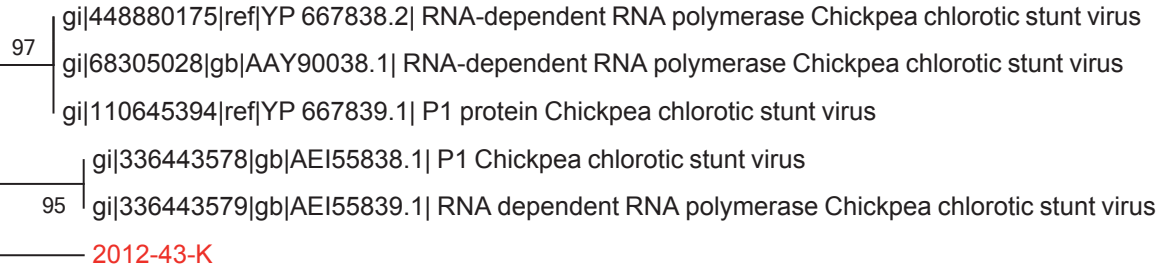

0.05

ML Tree 51  
Luteoviridae

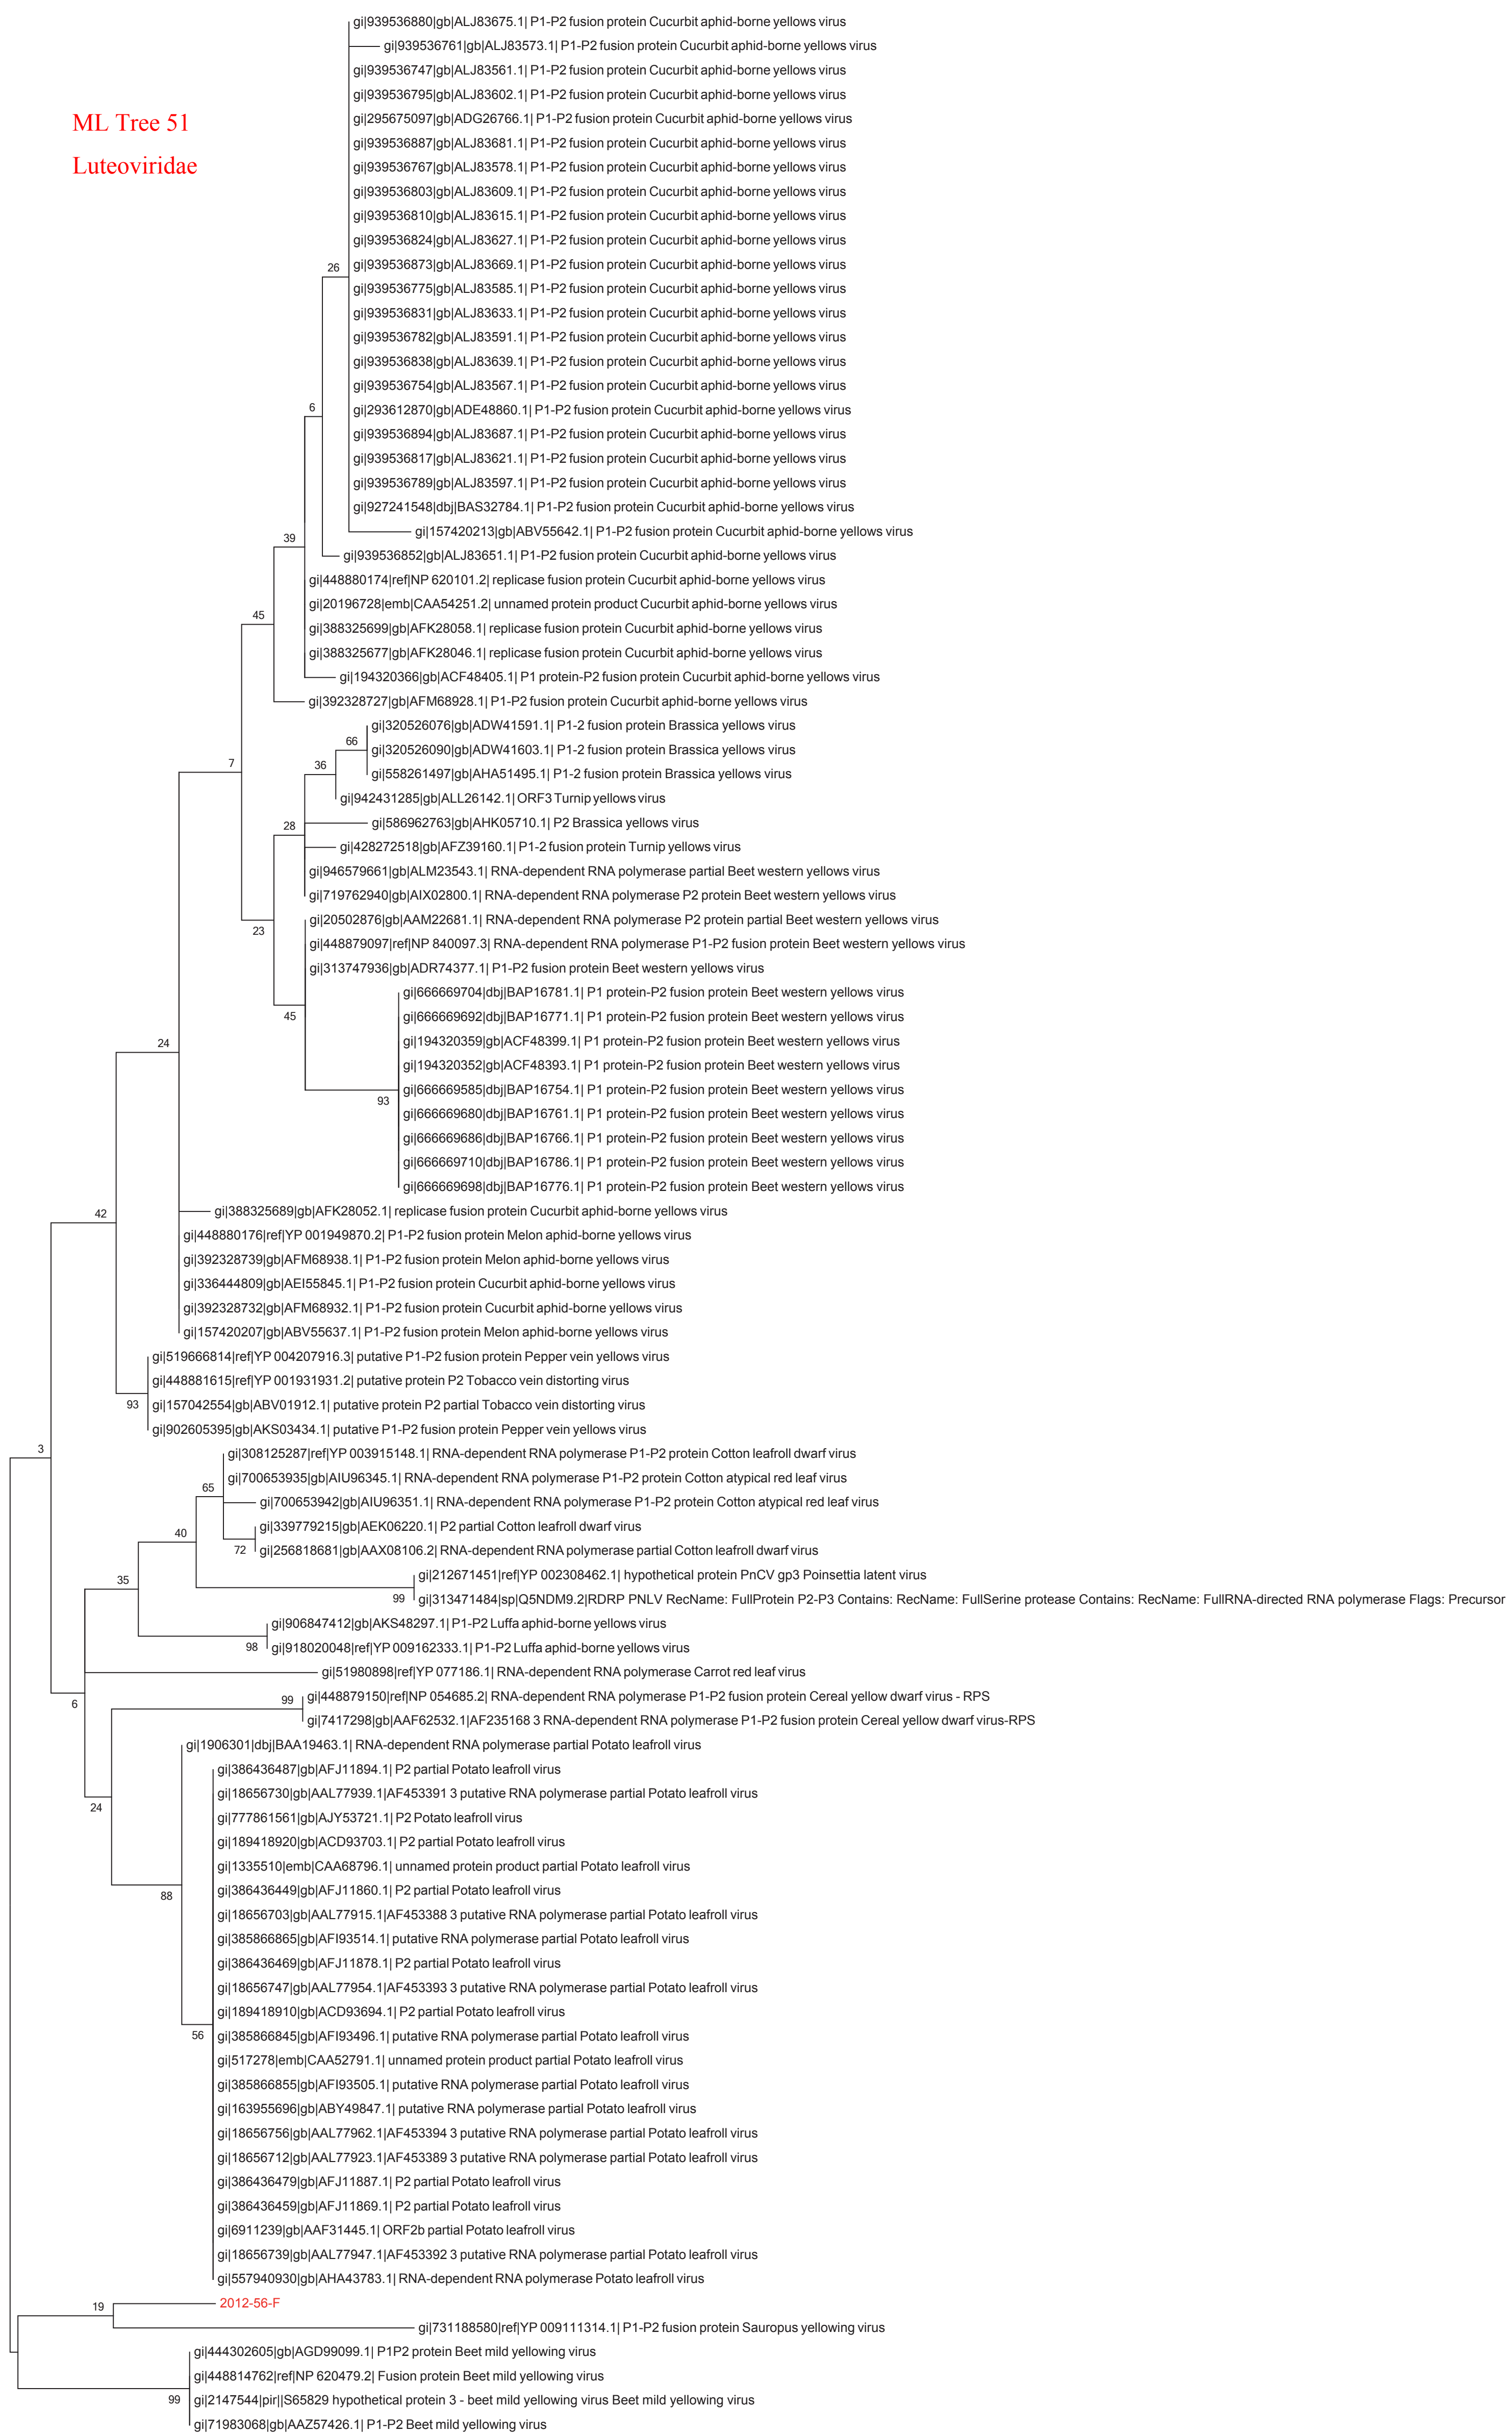

0.05



ML Tree 52  
Luteoviridae

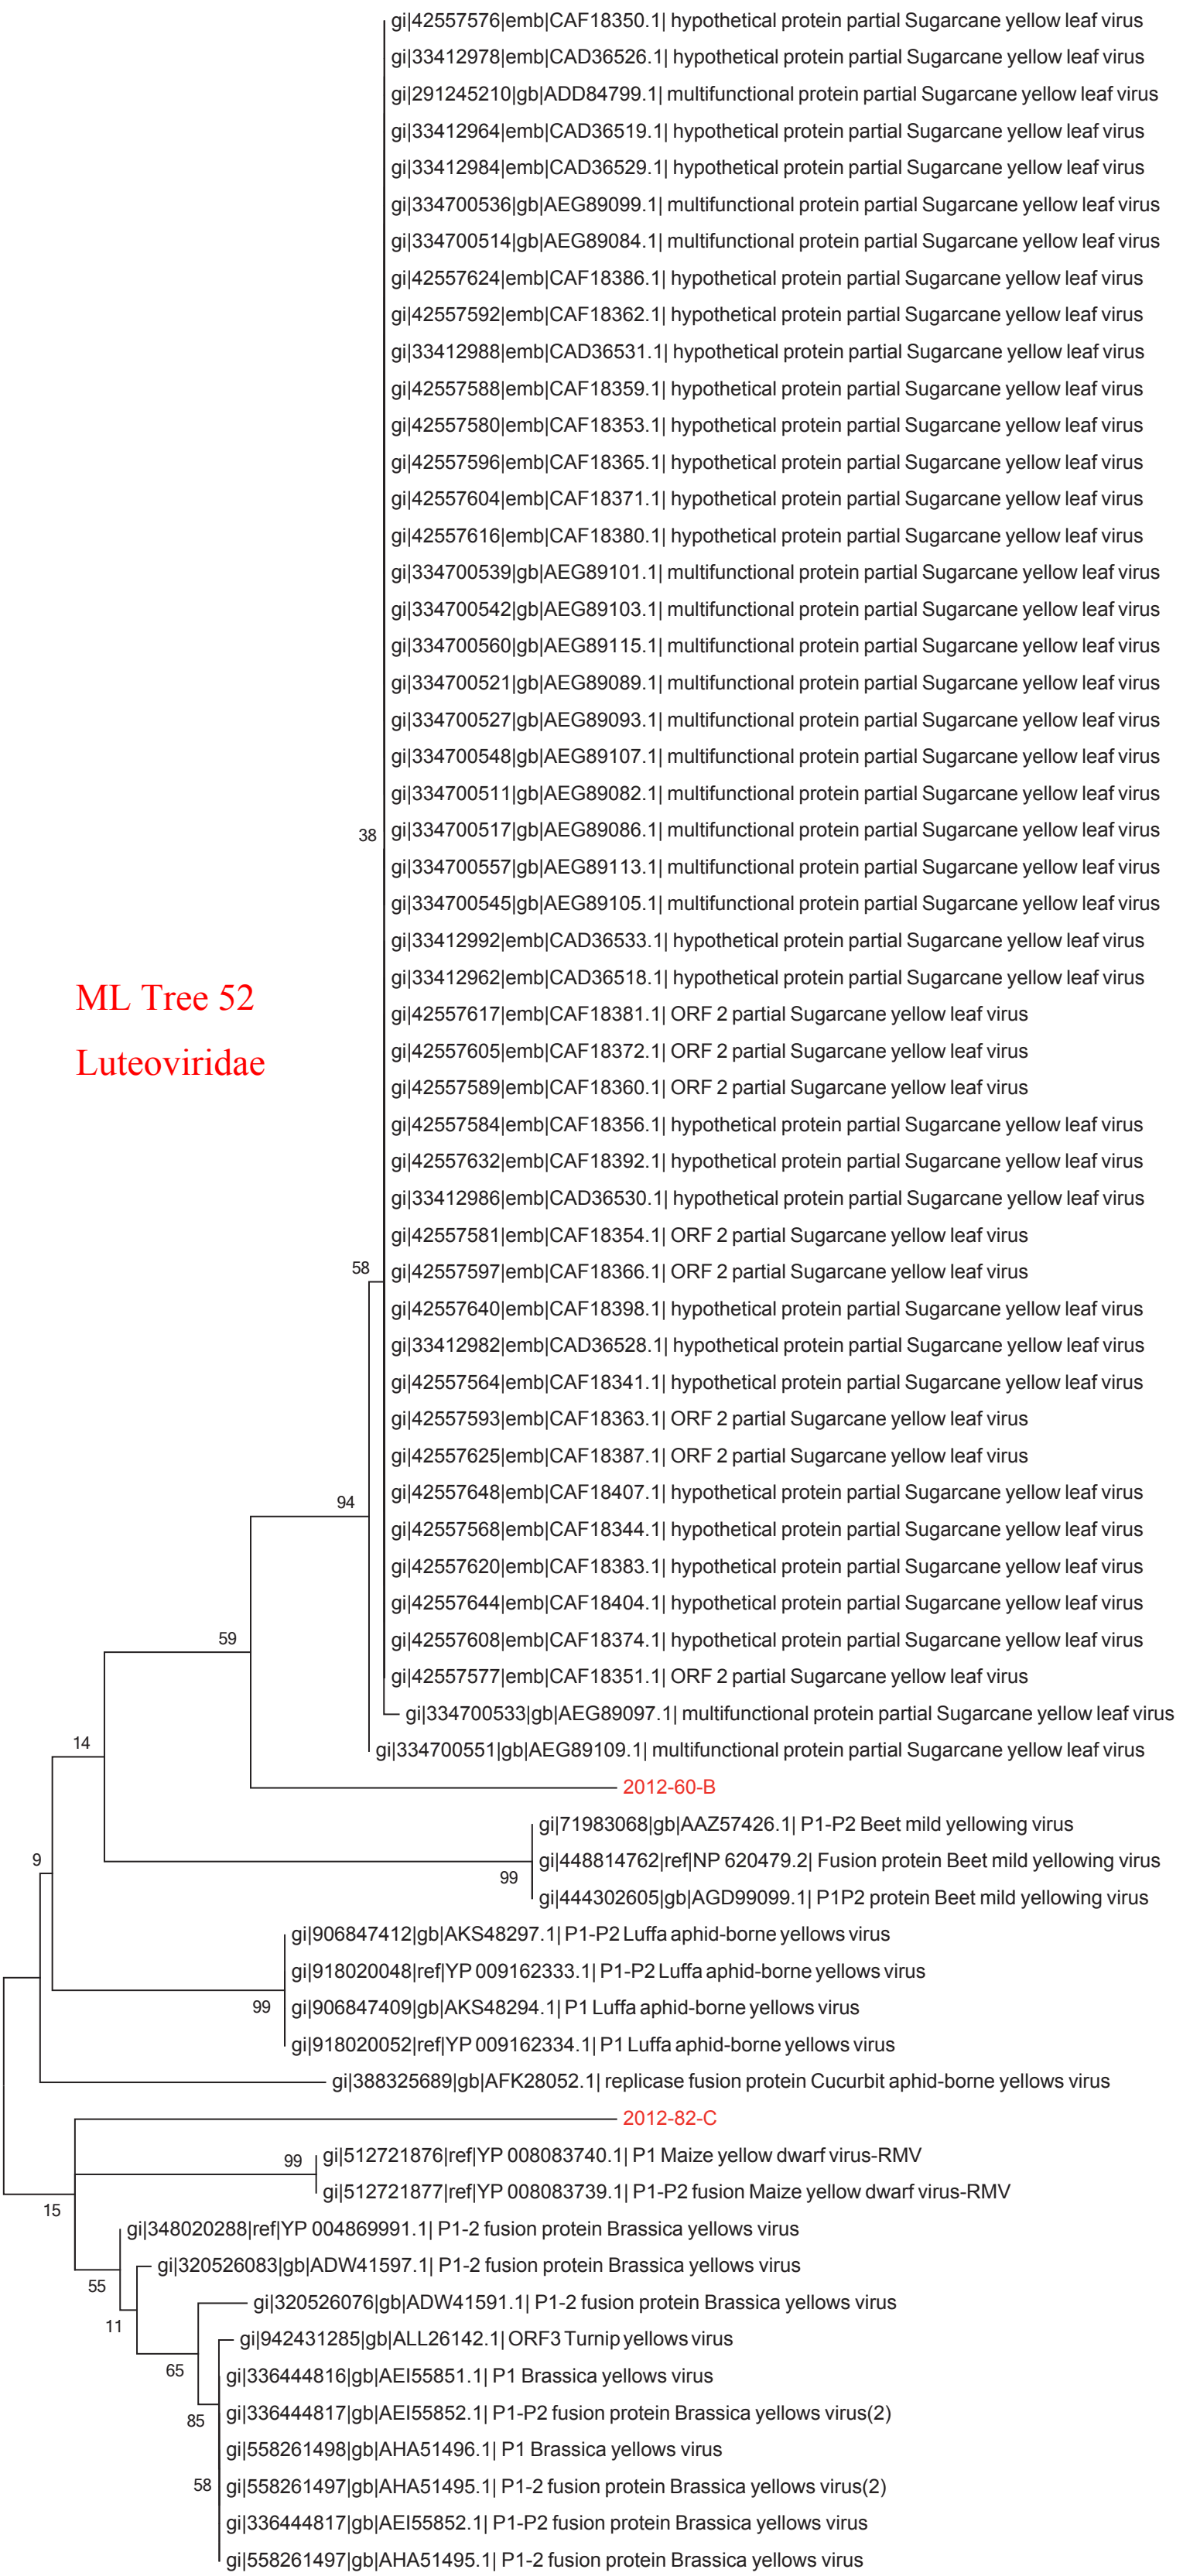

0.1

# ML Tree 53

## Nanoviridae

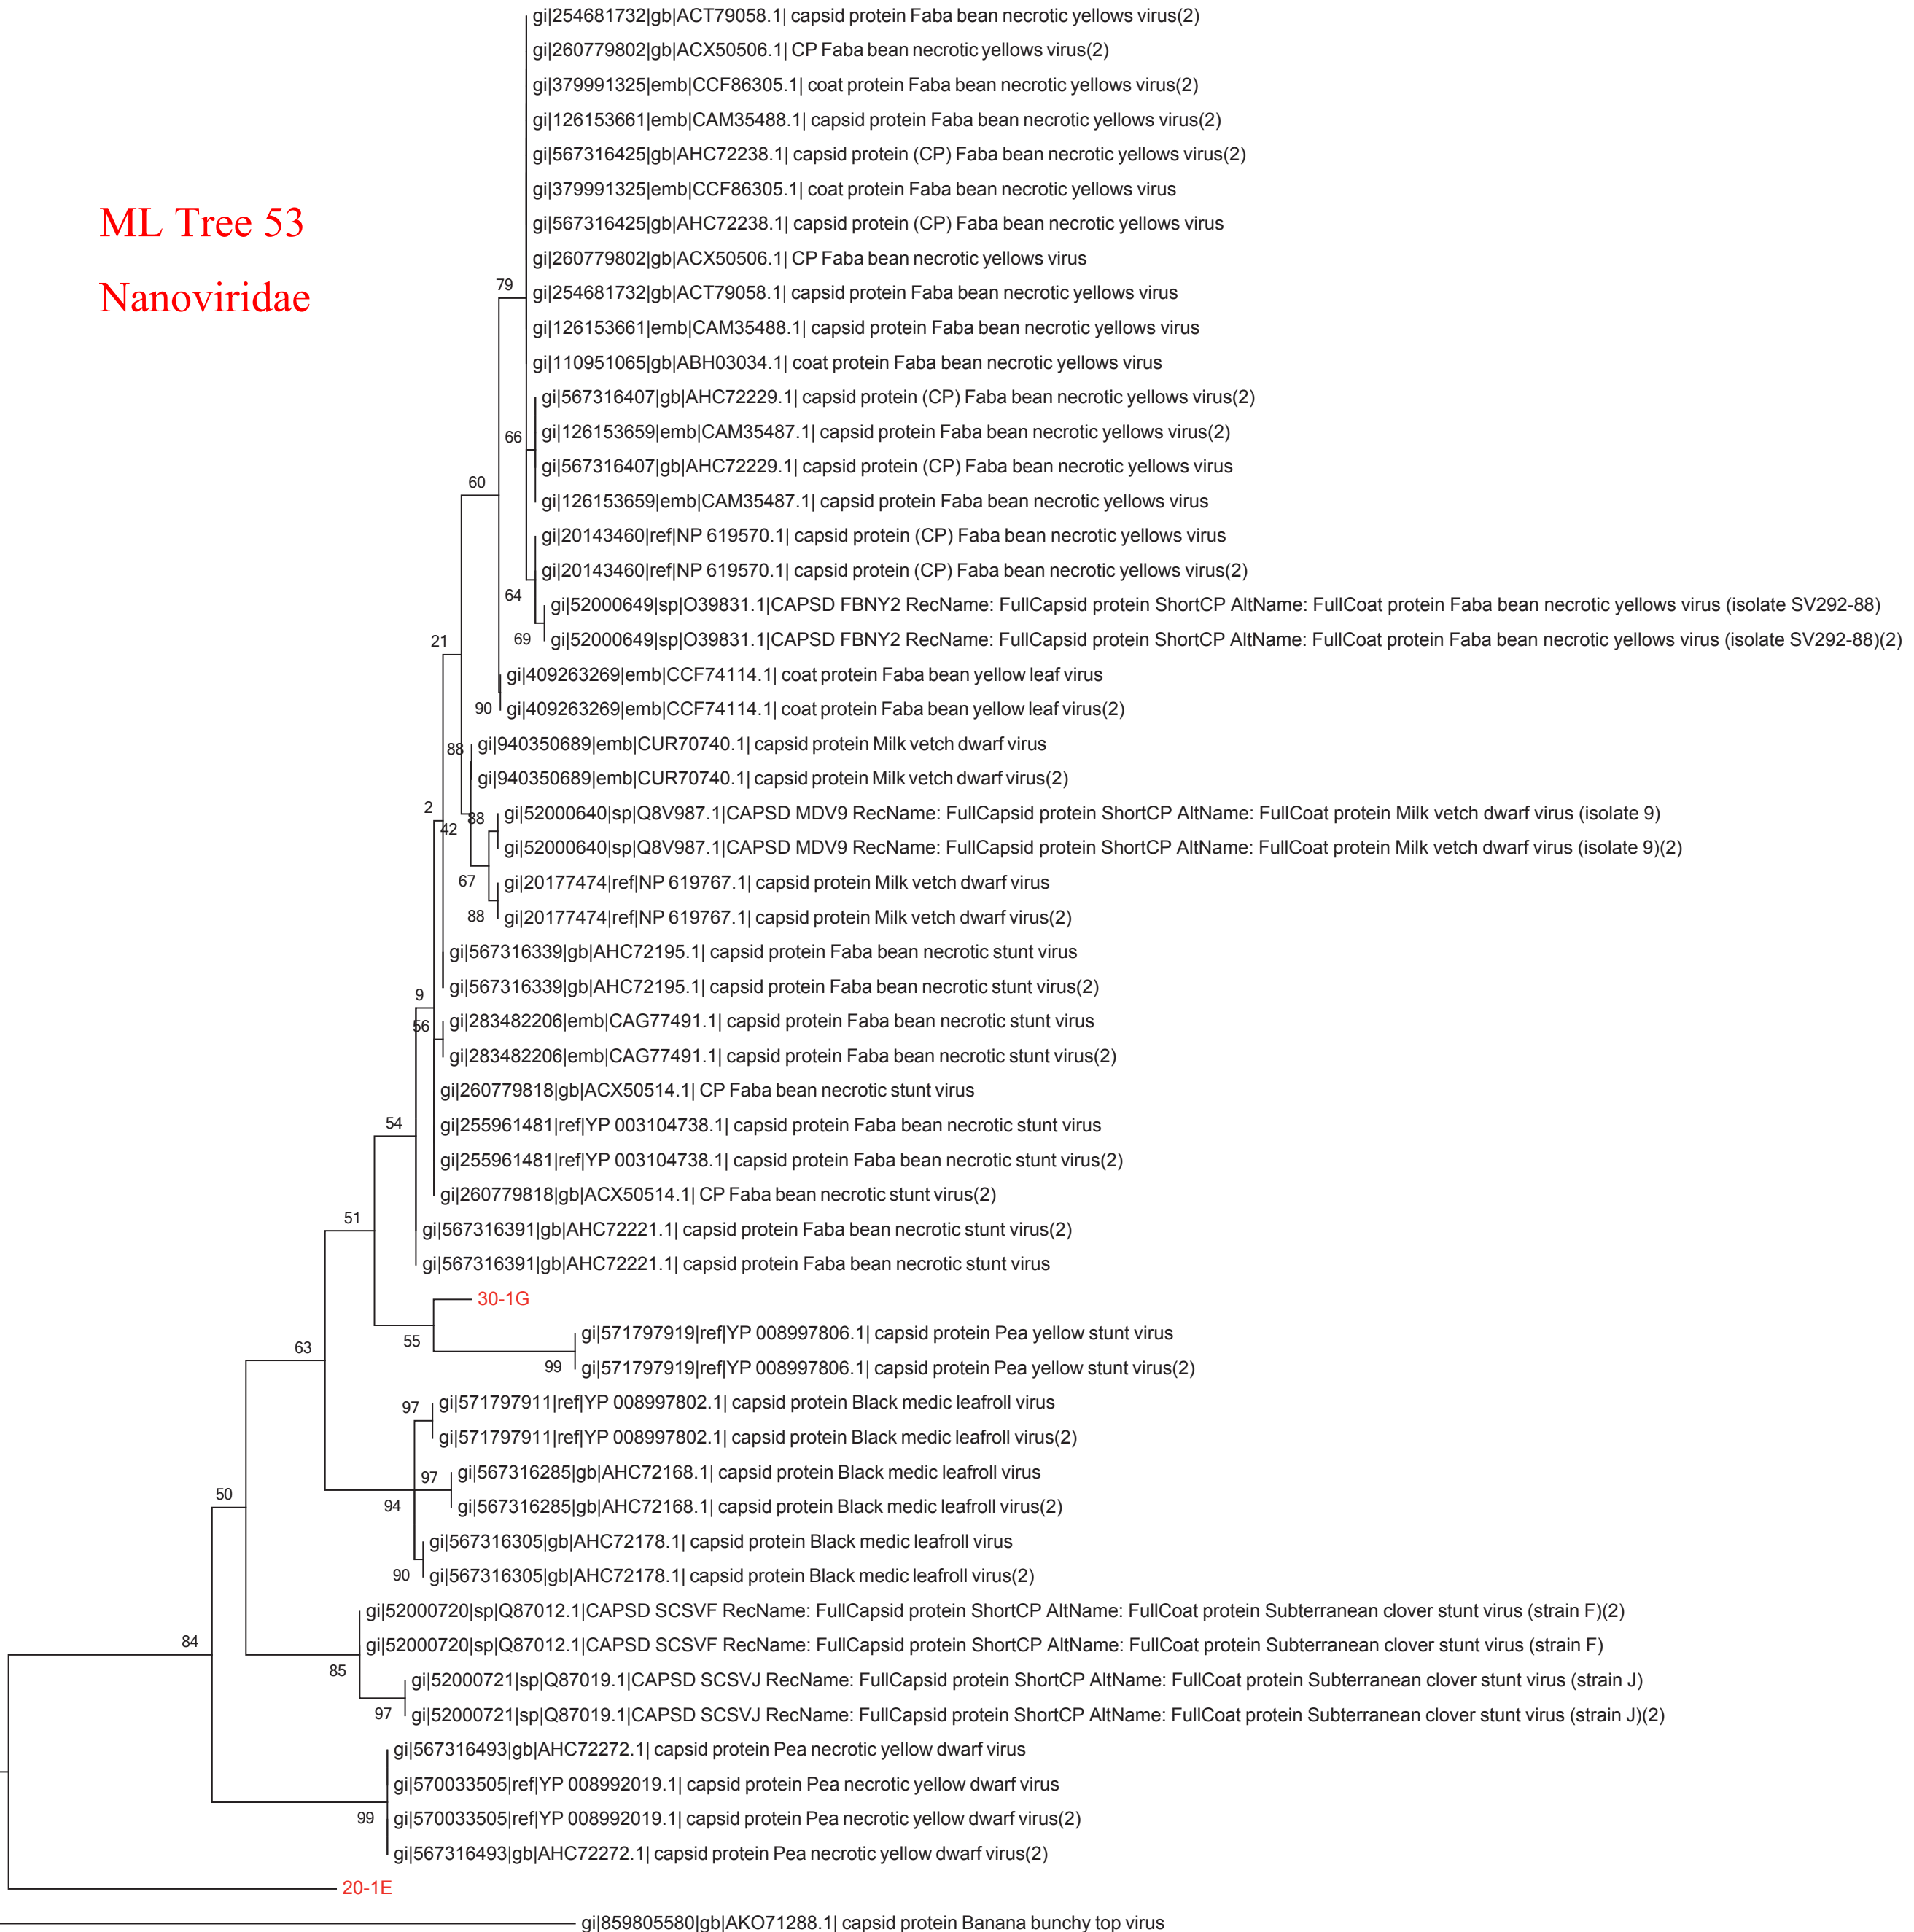

0.2



ML Tree 54

Nanoviridae

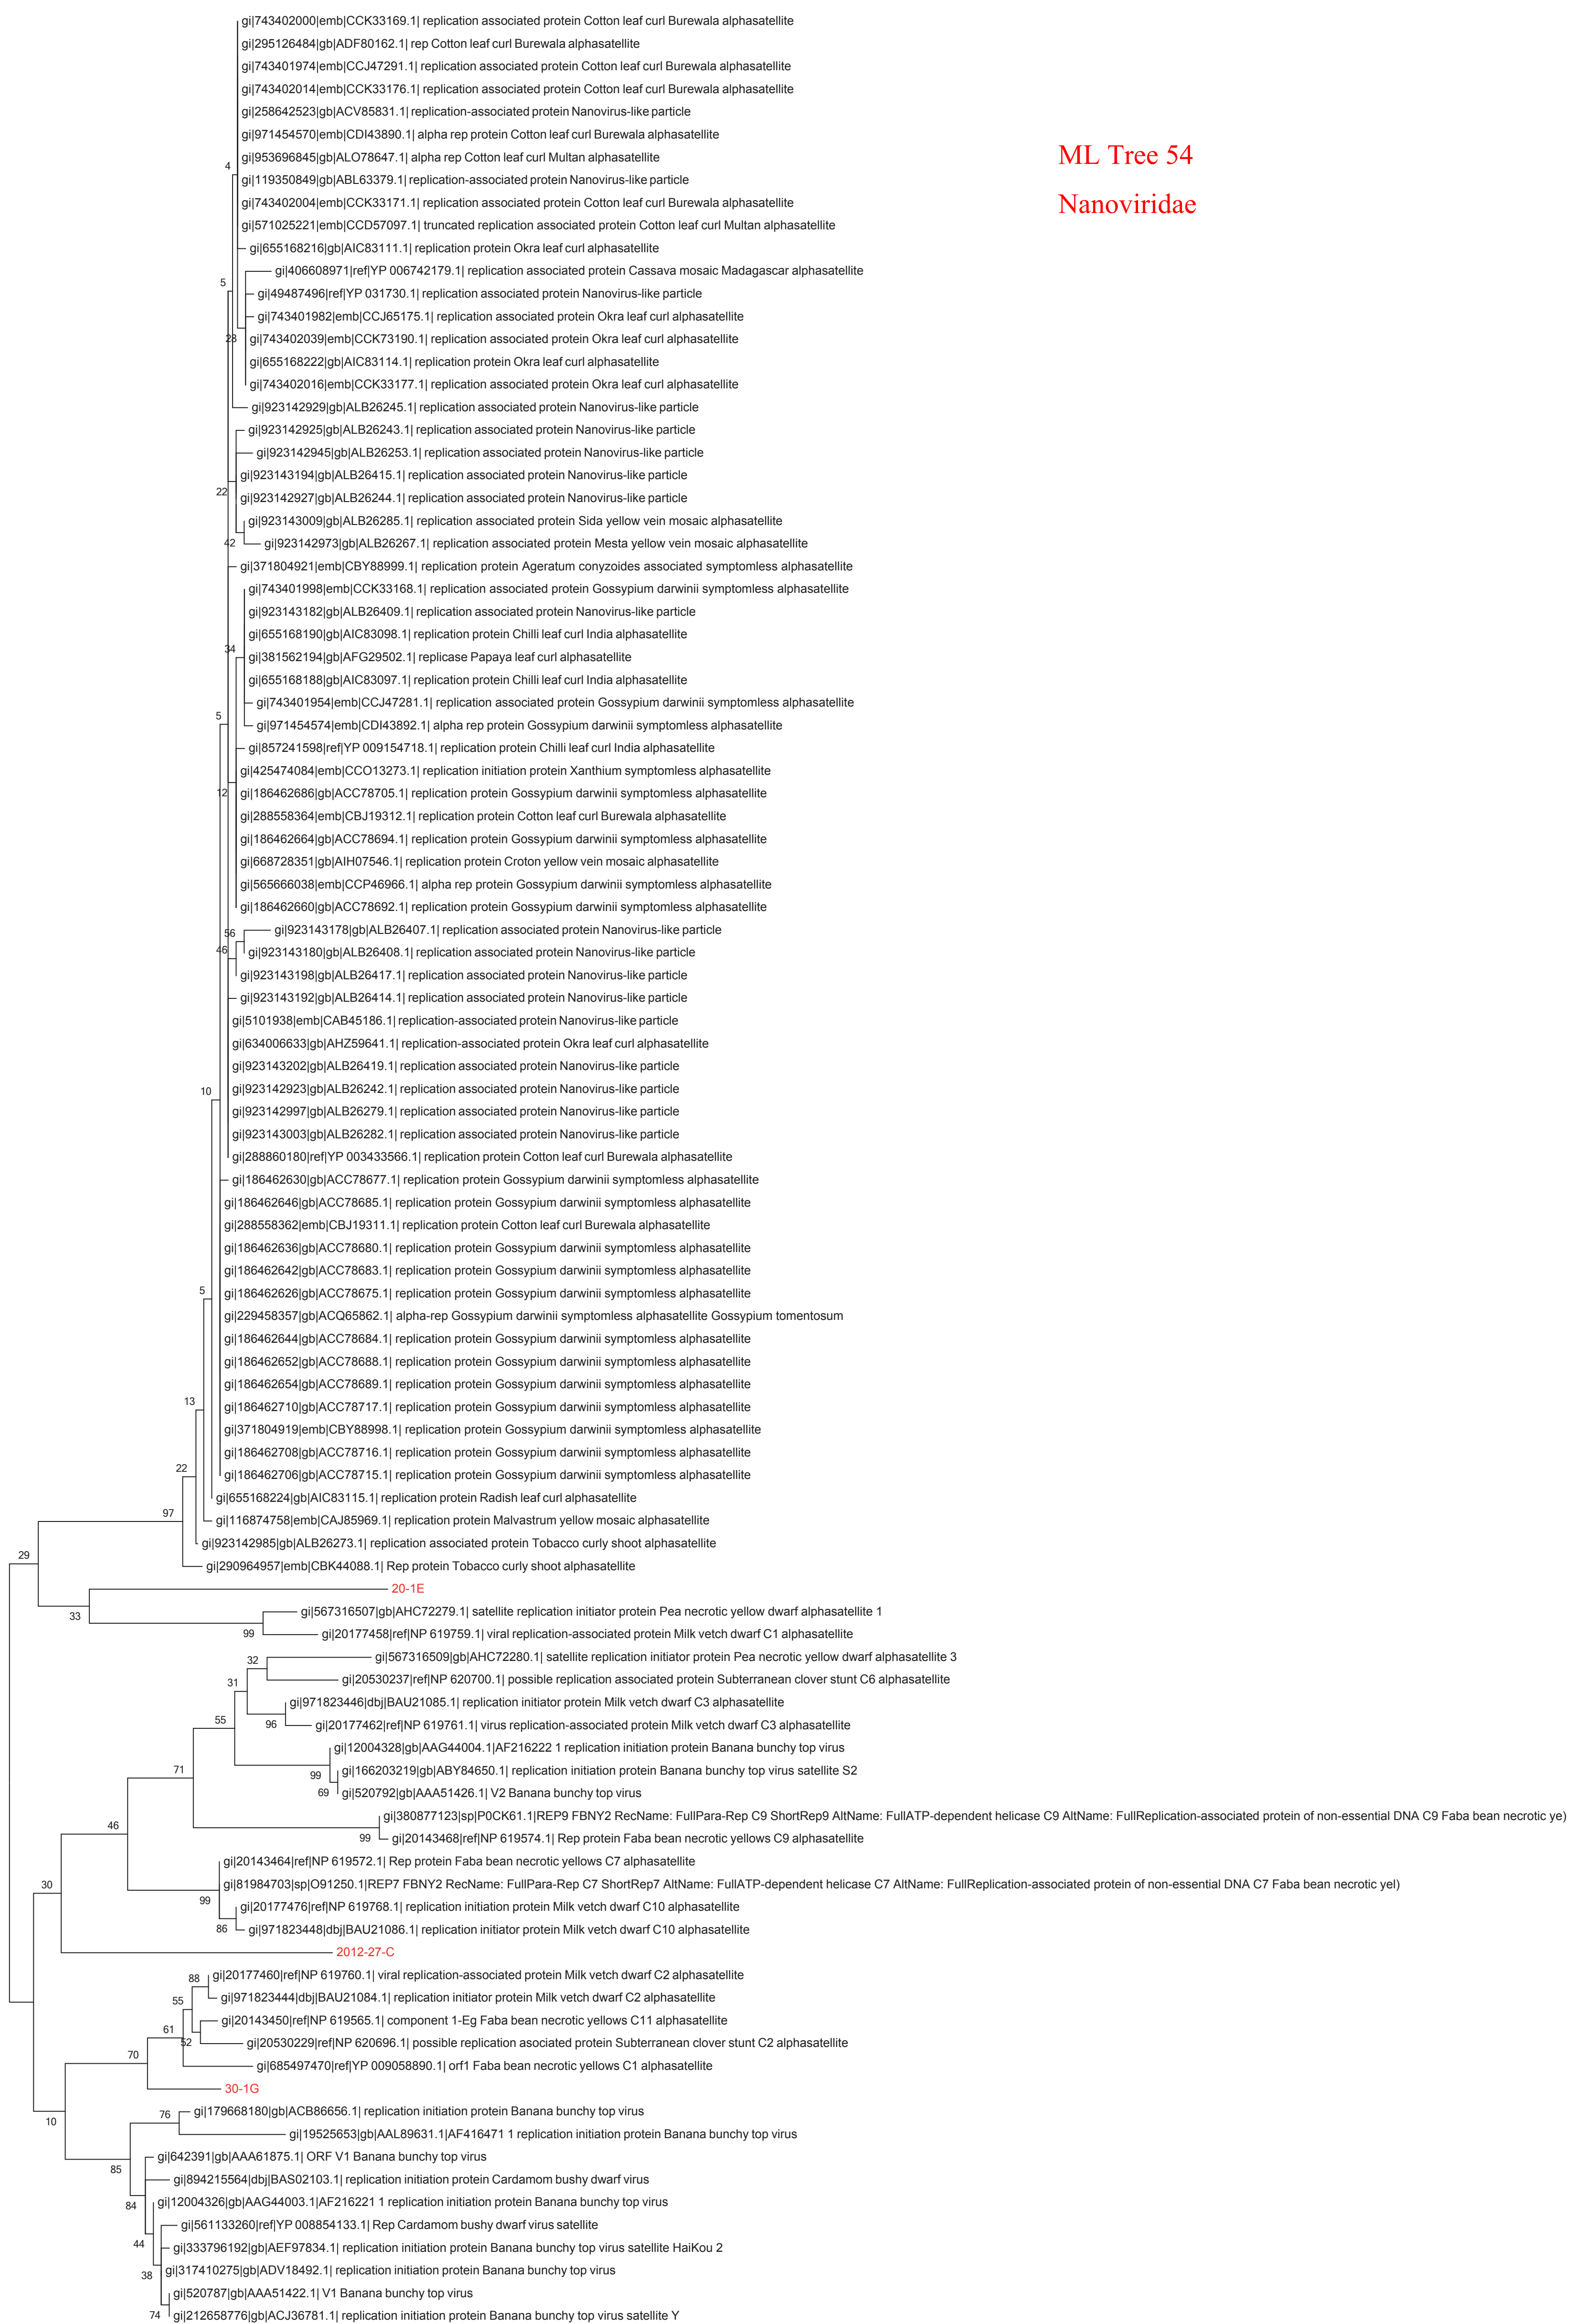

0.1



ML Tree 55

Potyviridae

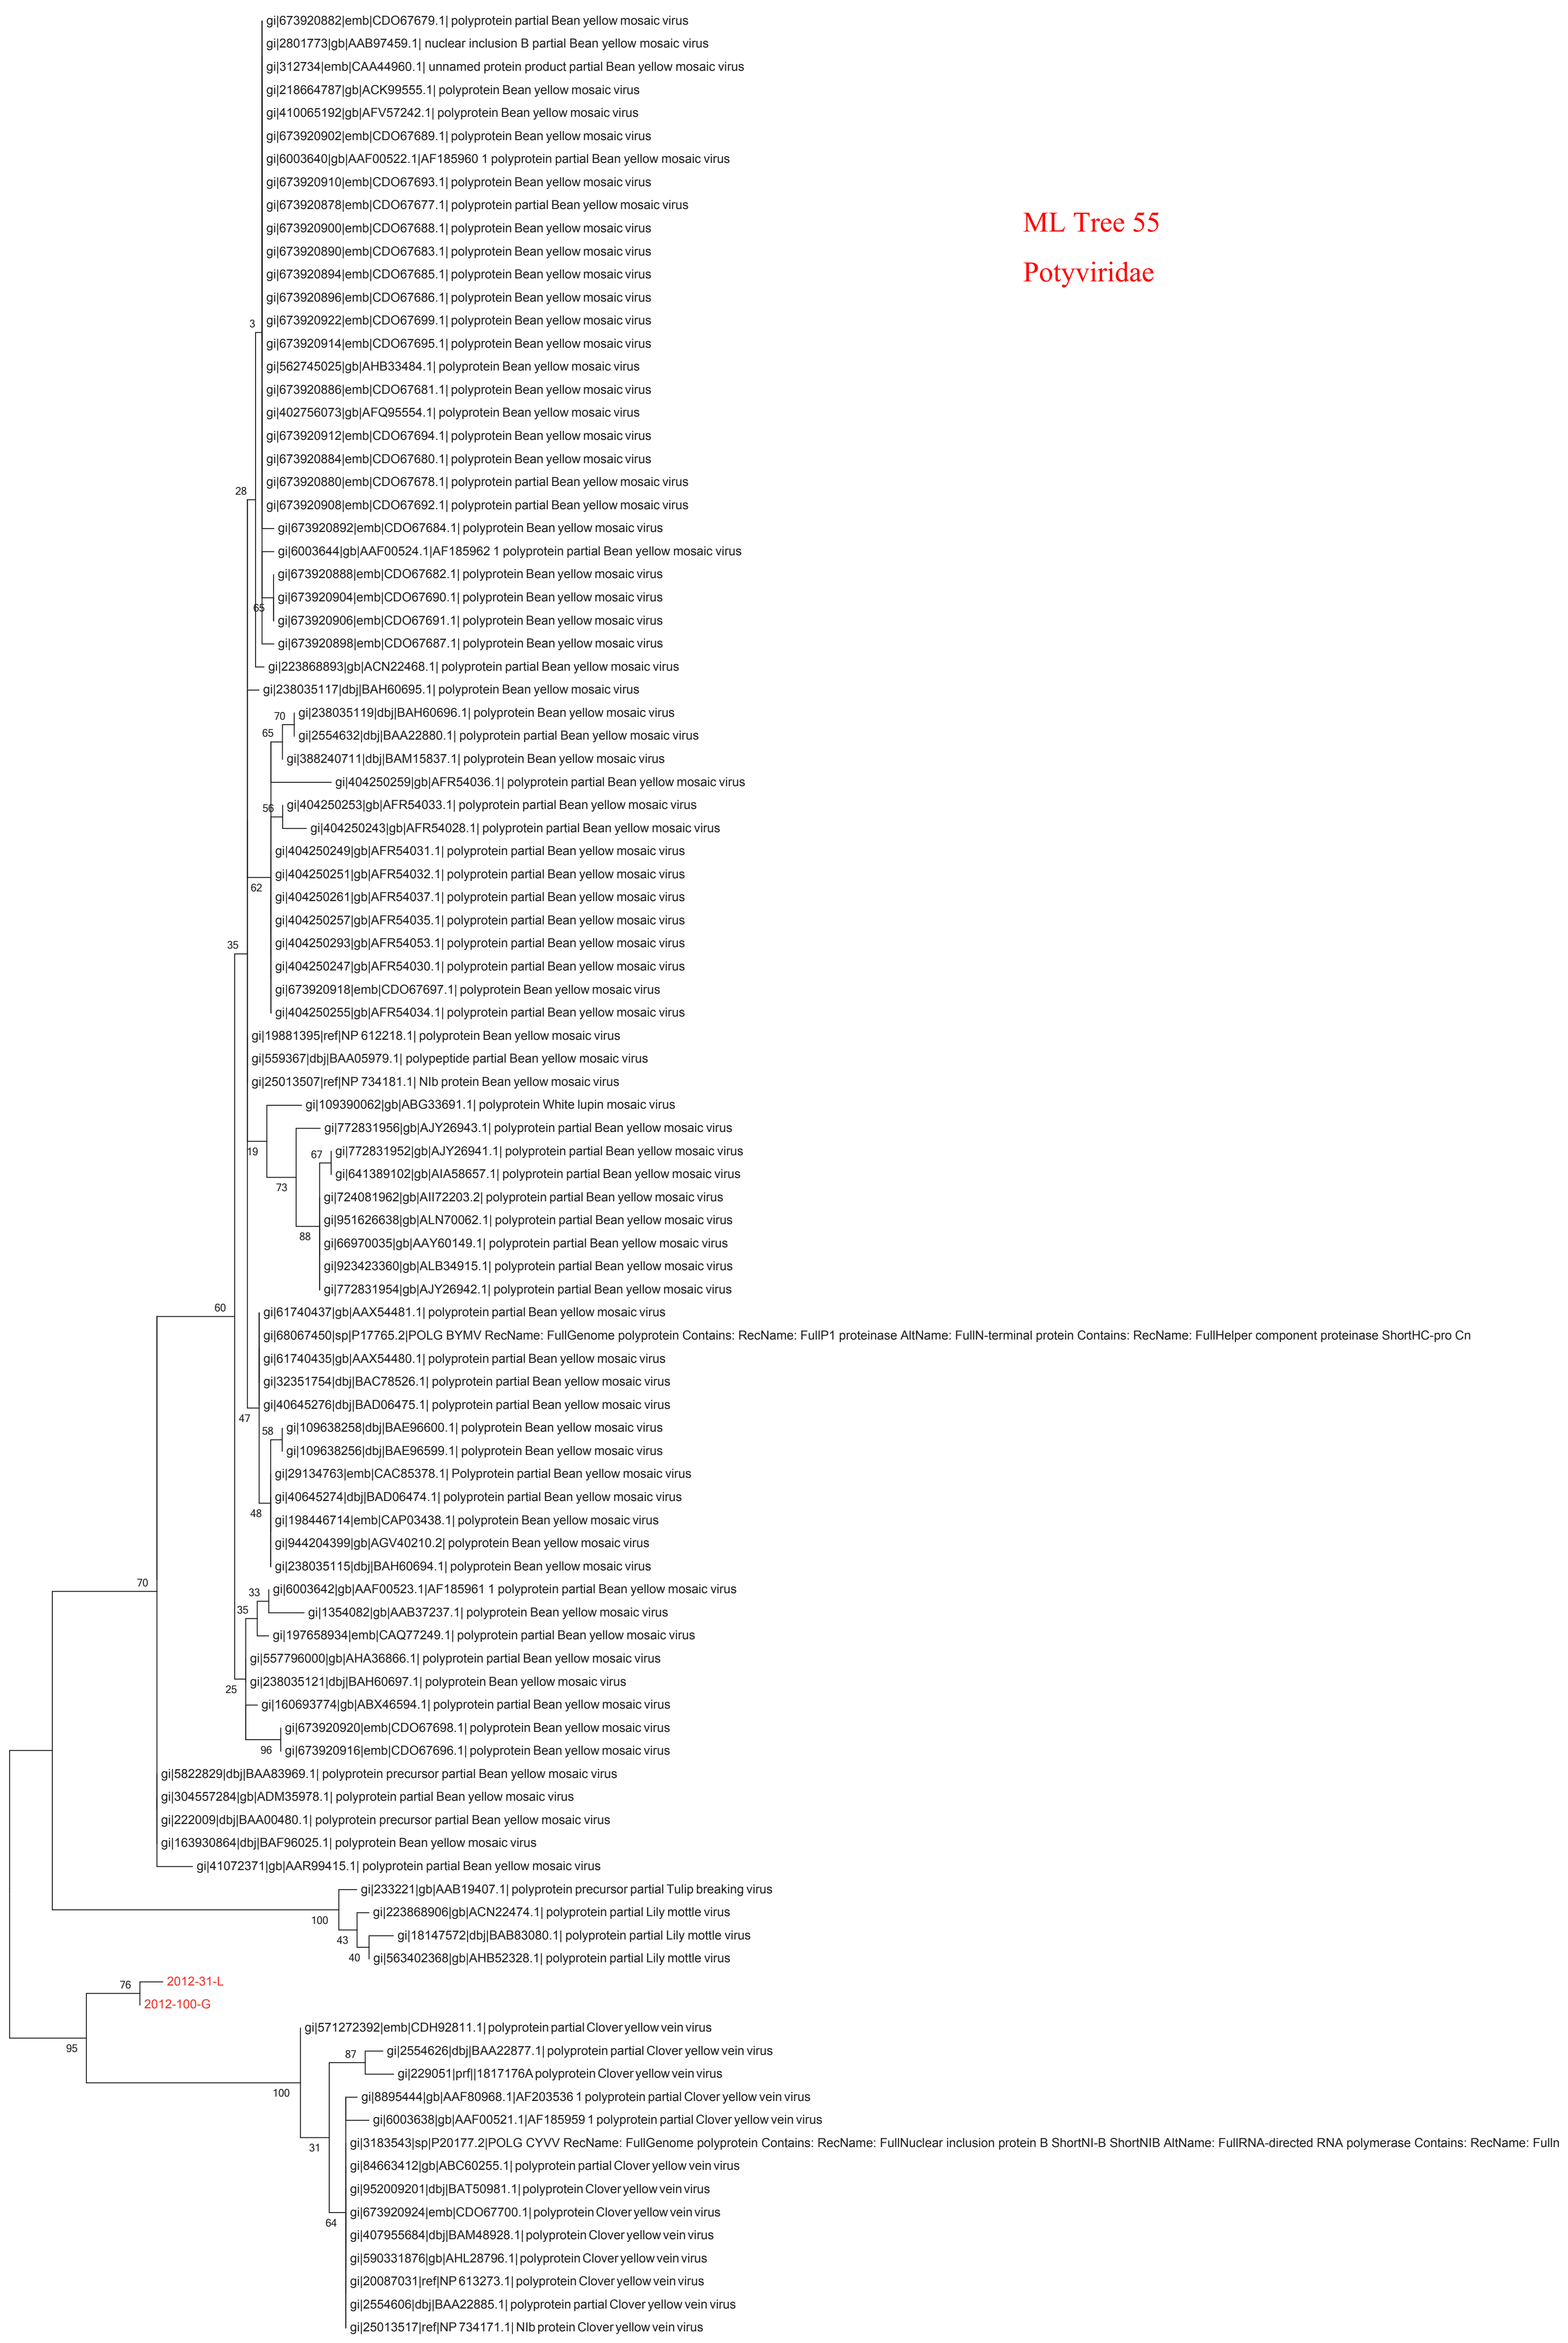

0.1



# ML Tree 56

## Potyviridae

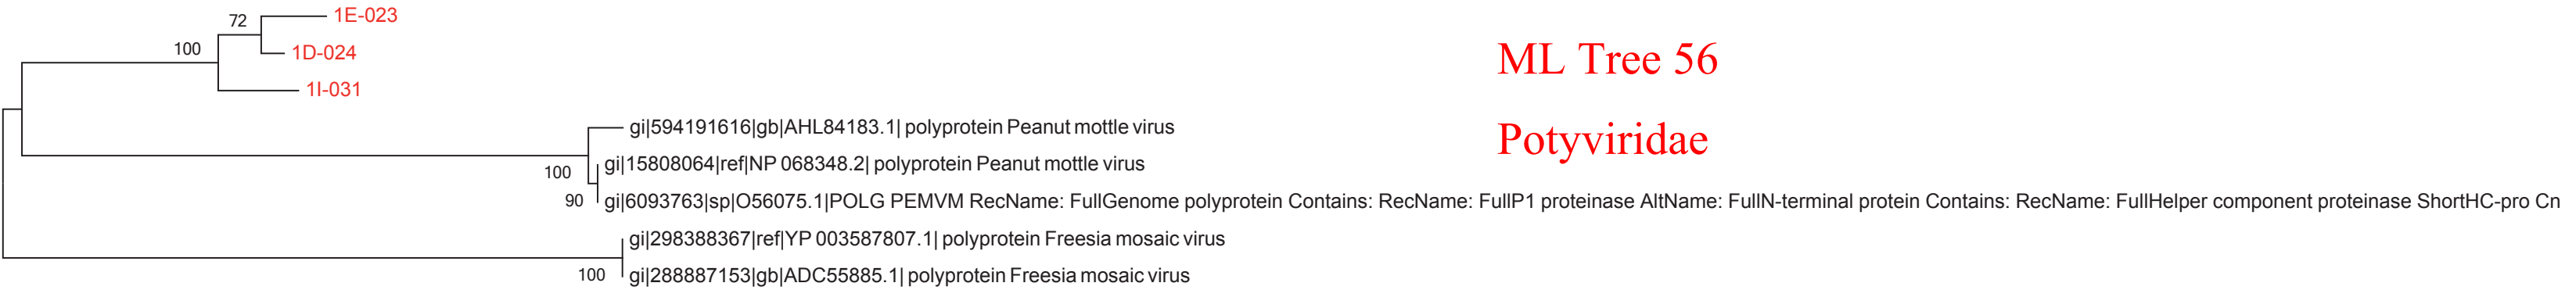

0.05

# ML Tree 57

## Potyviridae

100

gi|803431957|ref|YP\_009129267.1| polyprotein Artichoke latent virus

gi|772519984|gb|AJW83675.1| polyprotein Artichoke latent virus

gi|567319615|gb|AHC72297.1| polyprotein Artichoke latent virus

gi|313678123|gb|ADR74229.1| polyprotein partial Ranunculus latent virus

2012-58-C

gi|745788243|gb|AJD23391.1| polyprotein Chinese yam necrotic mosaic virus

0.1

ML Tree 58  
Potyviridae

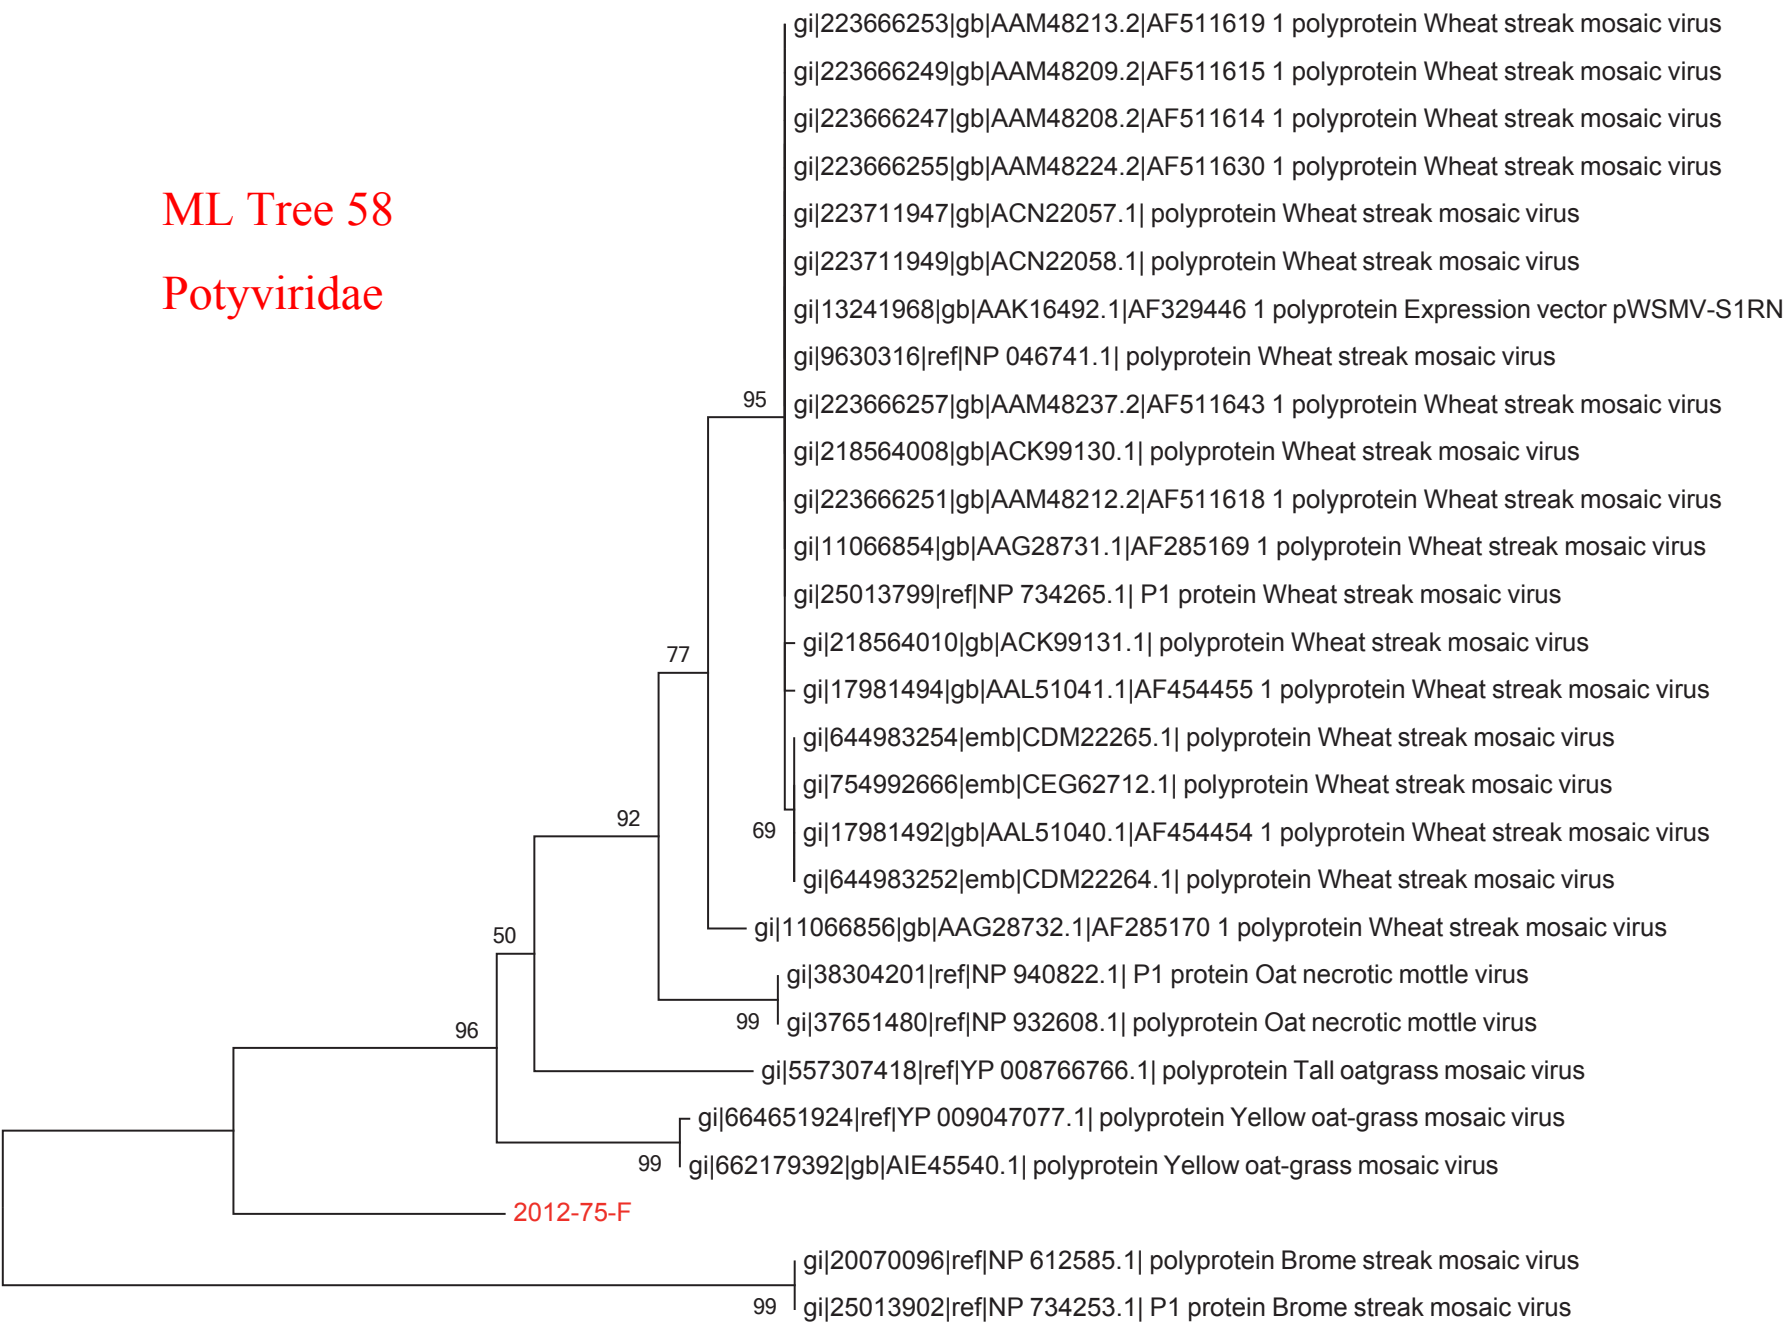

0.2



# ML Tree 59

## Potyviridae

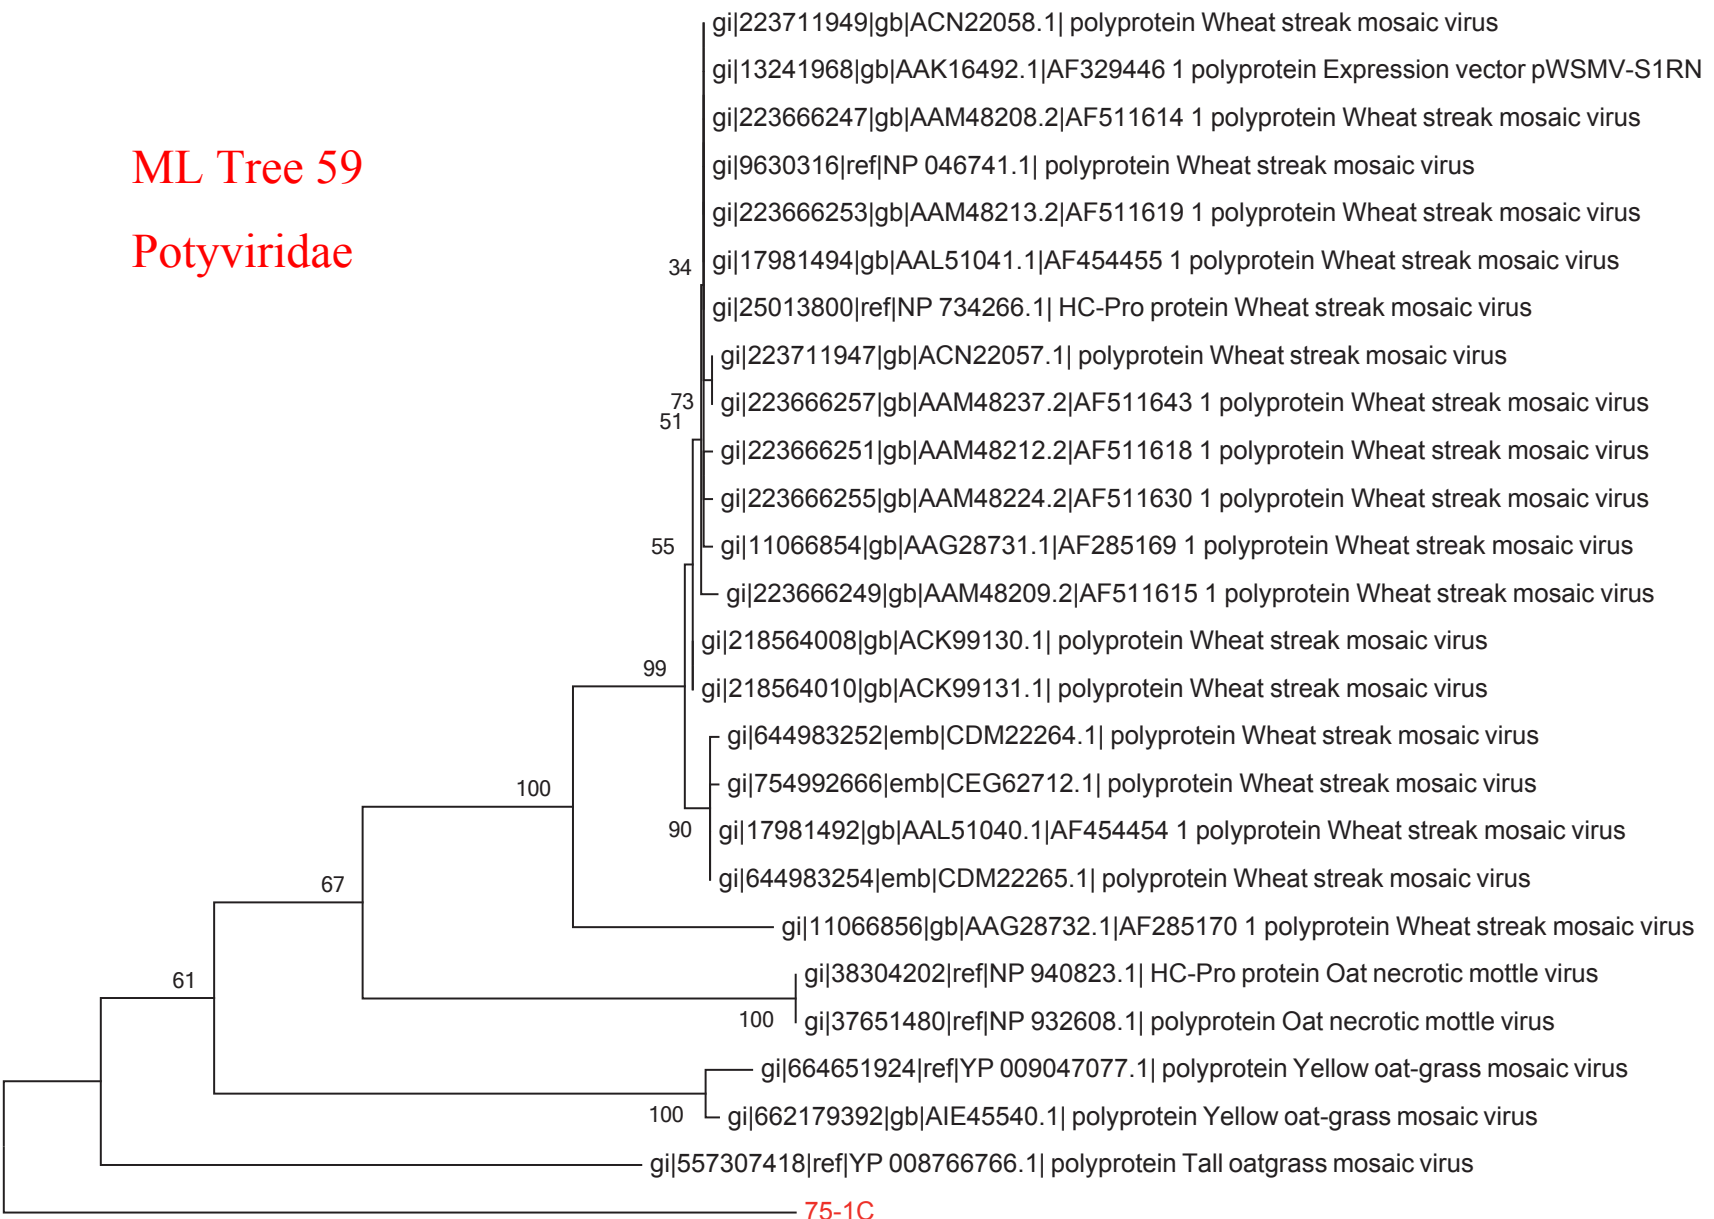

0.1

# ML Tree 60

## Reoviridae

gi|1095740|prf||2109367A P9 structural protein

gi|75568894|sp|Q86287.1|VP9 RRSVT RecName: FullStructural protein VP9 Rice ragged stunt virus (isolate Thailand)

gi|20428603|ref|NP\_620527.1| spike protein Rice ragged stunt virus

gi|330688262|gb|AEC32909.1| spike protein Rice ragged stunt virus

1C-081

0.05

ML Tree 61  
Rhabdoviridae

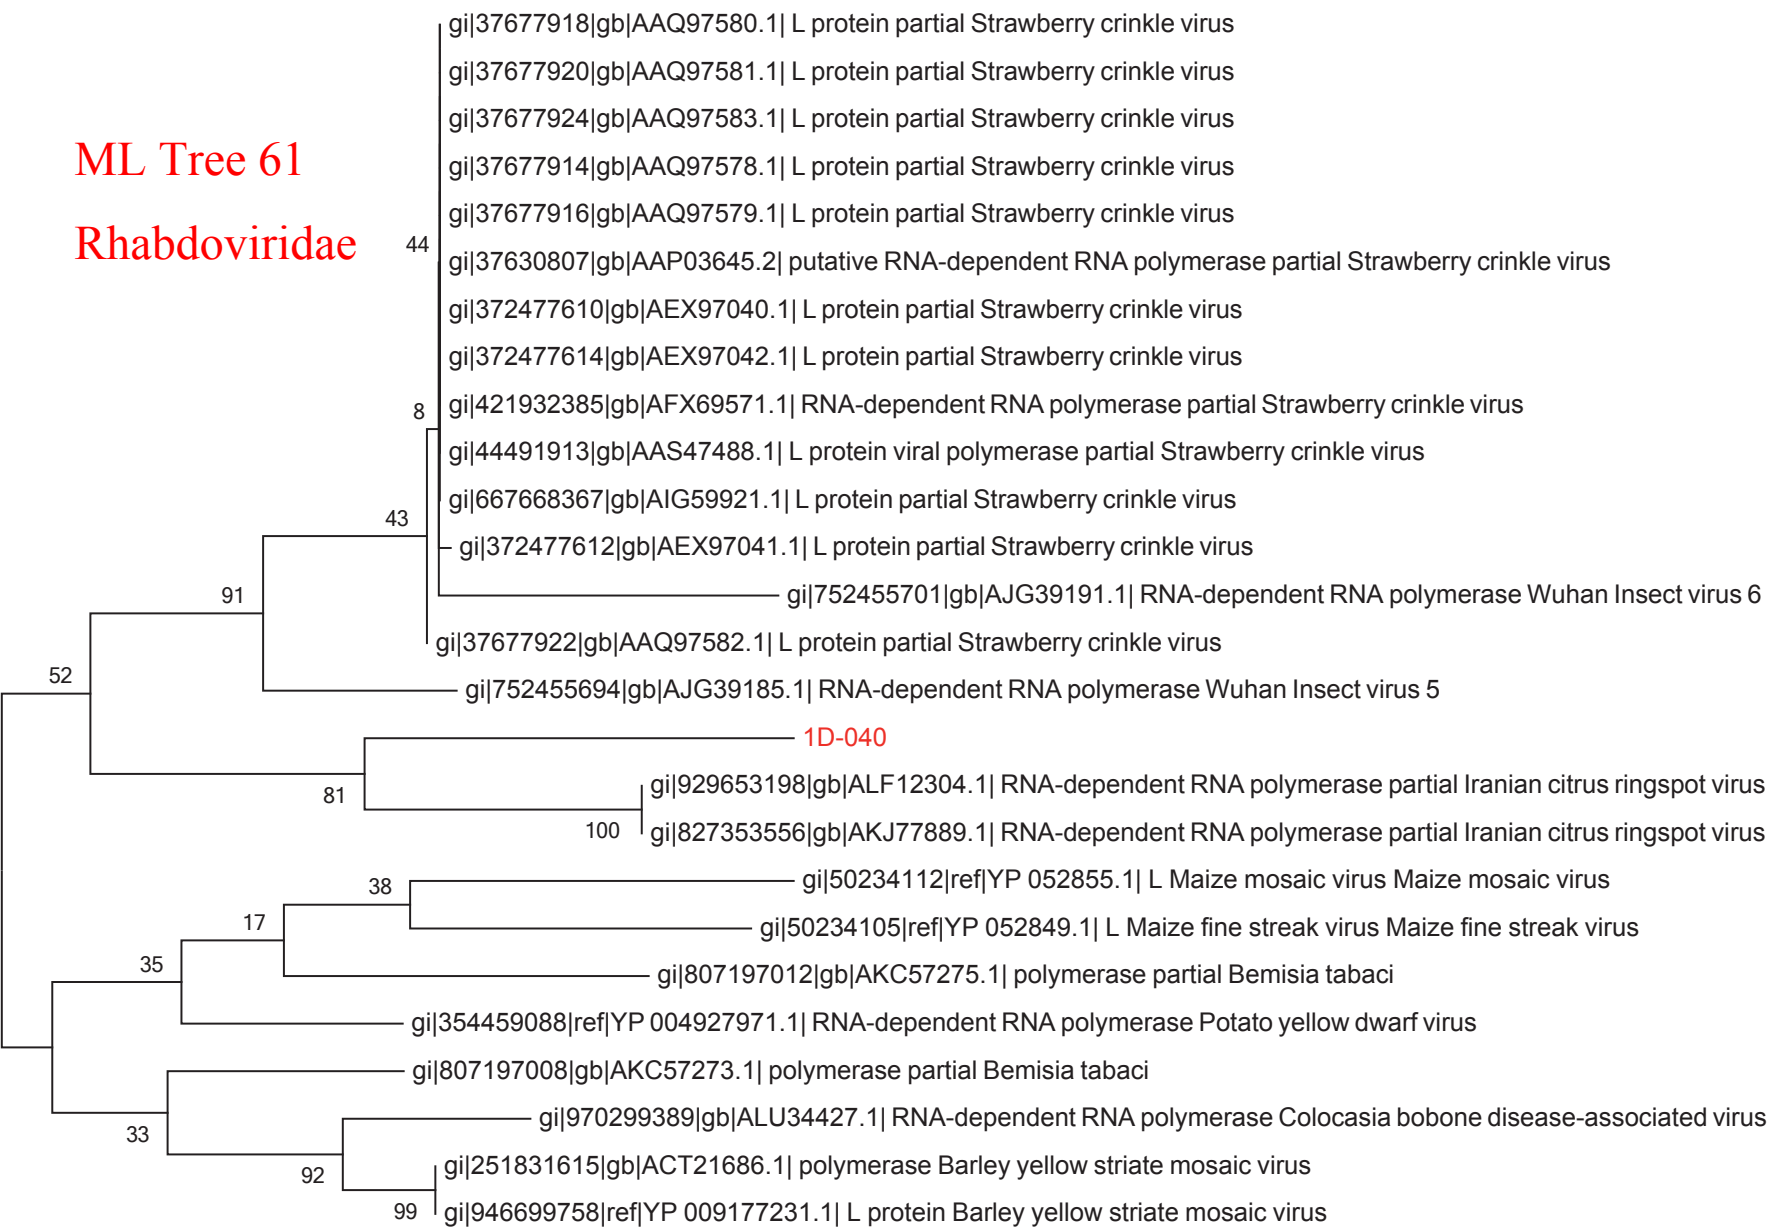

0.1

ML Tree 62

Secoviridae

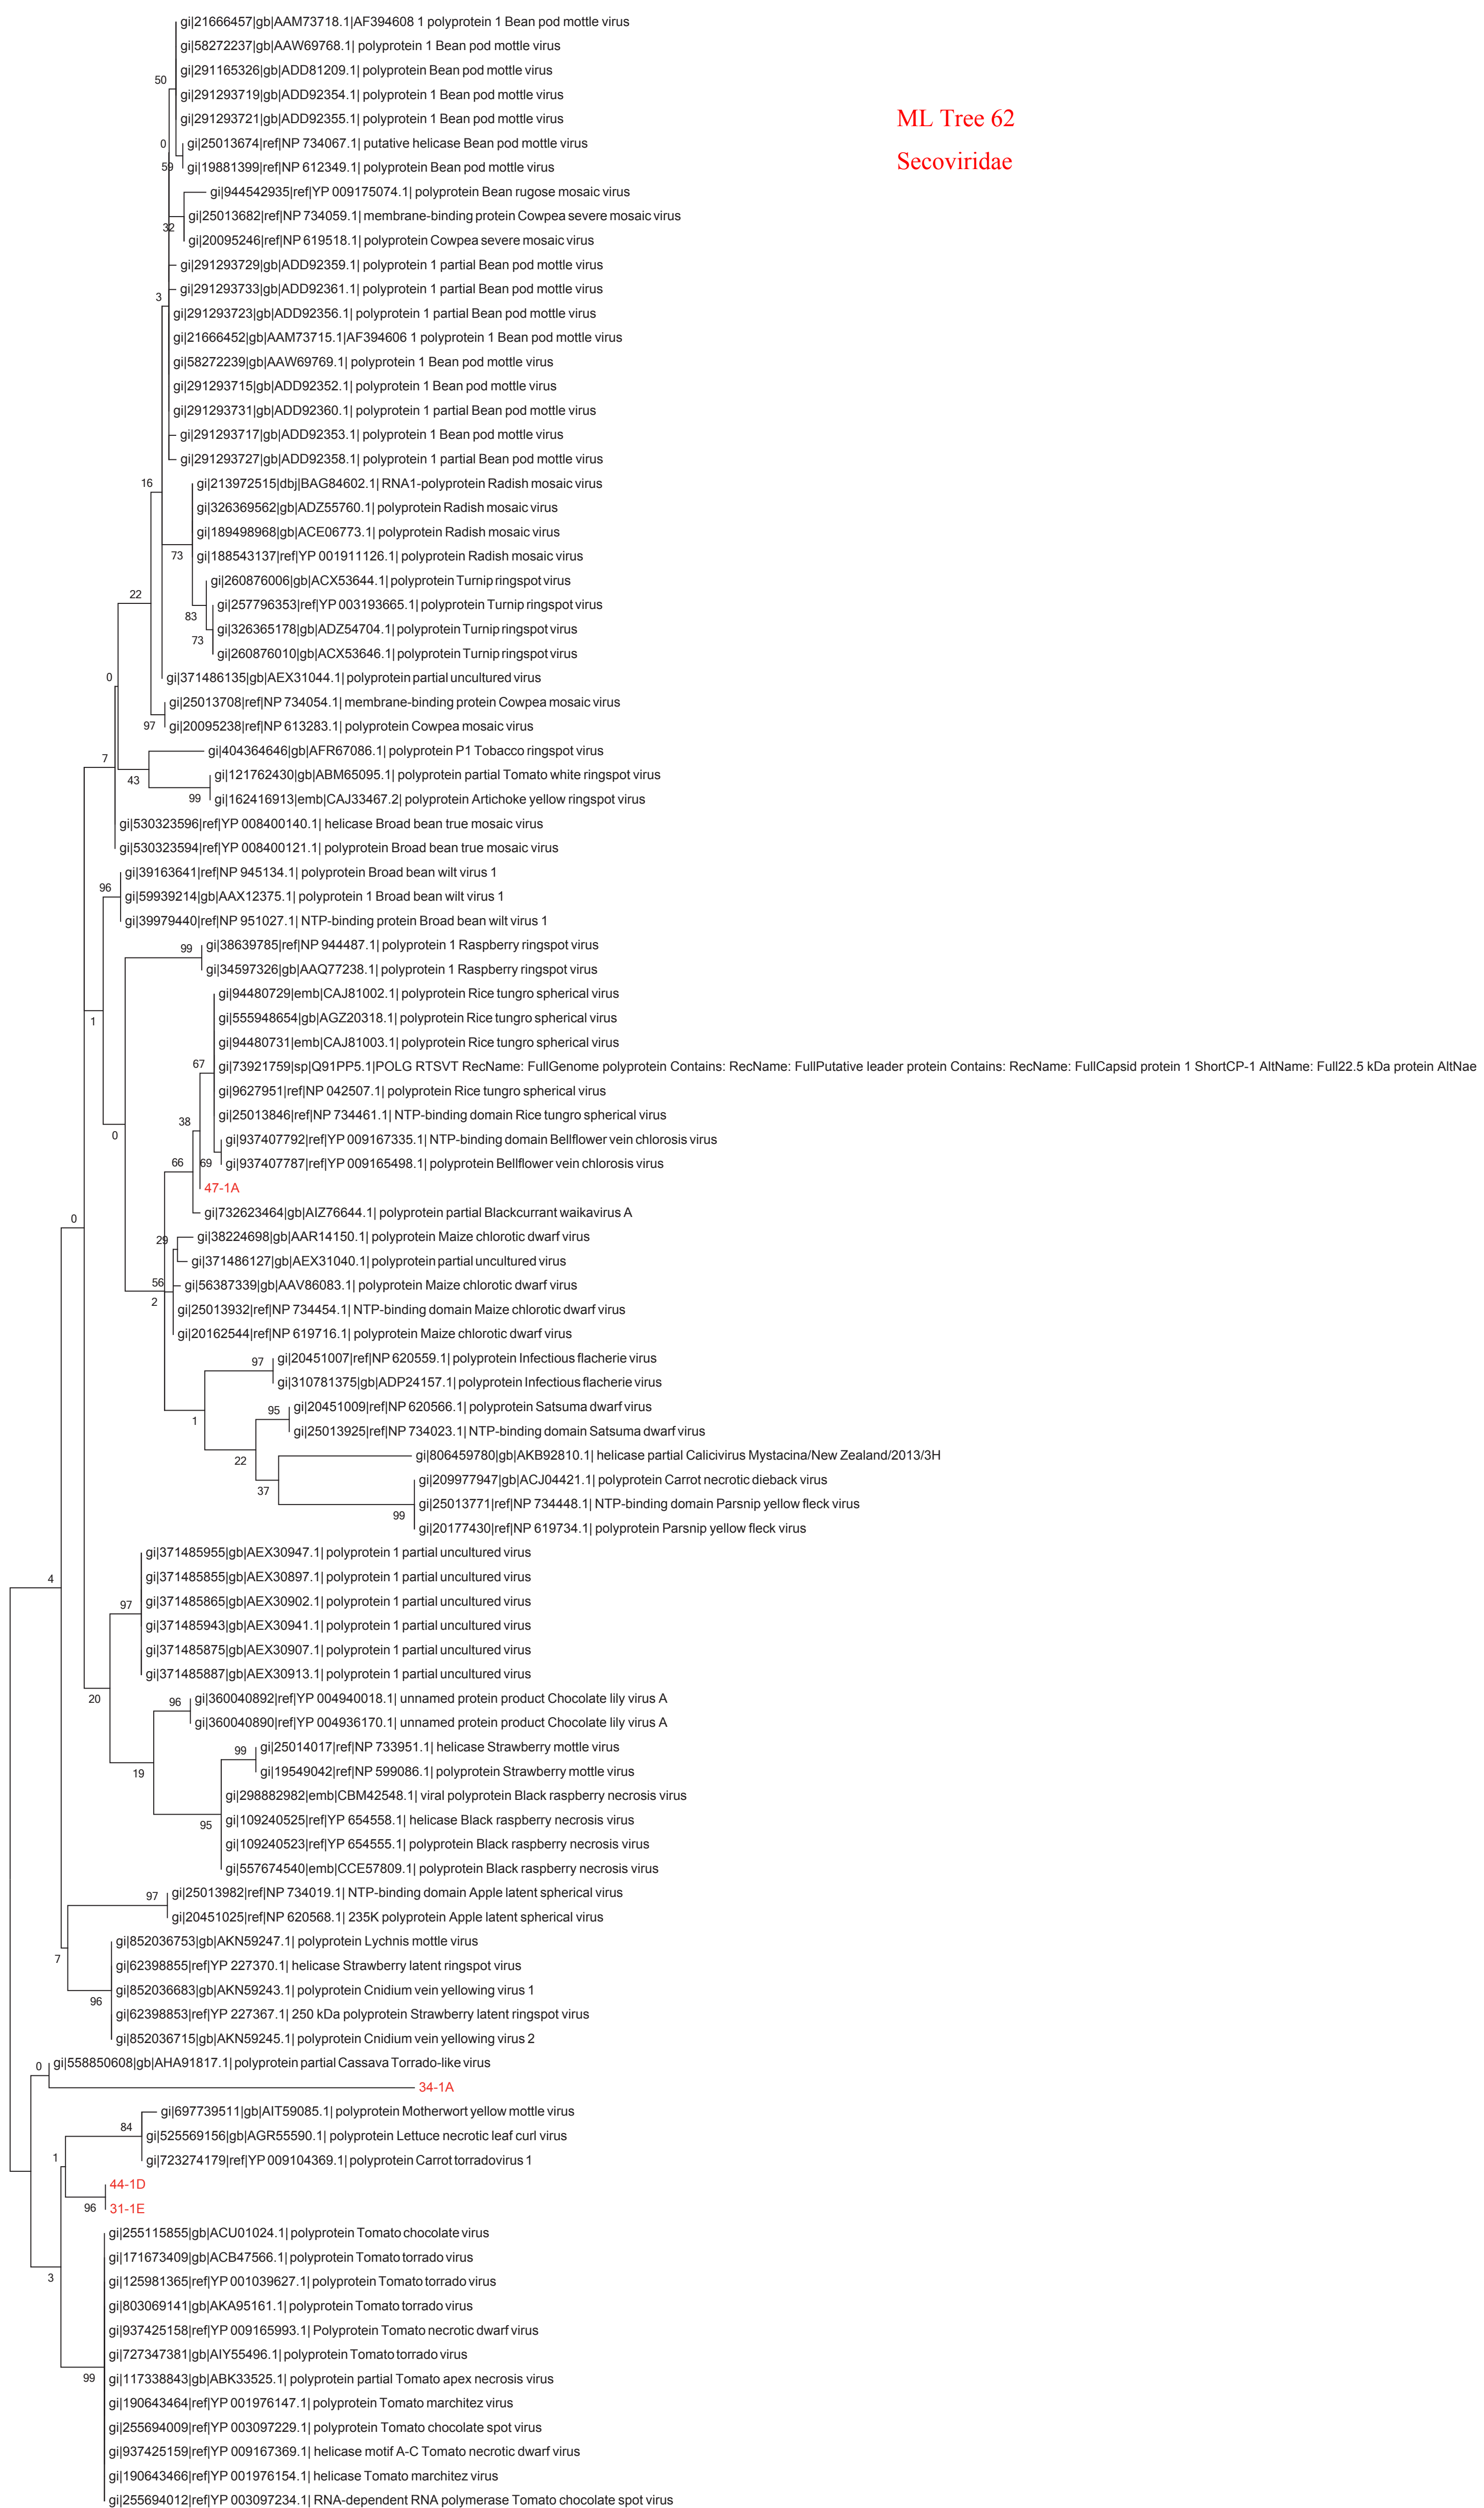



# ML Tree 63

## Secoviridae

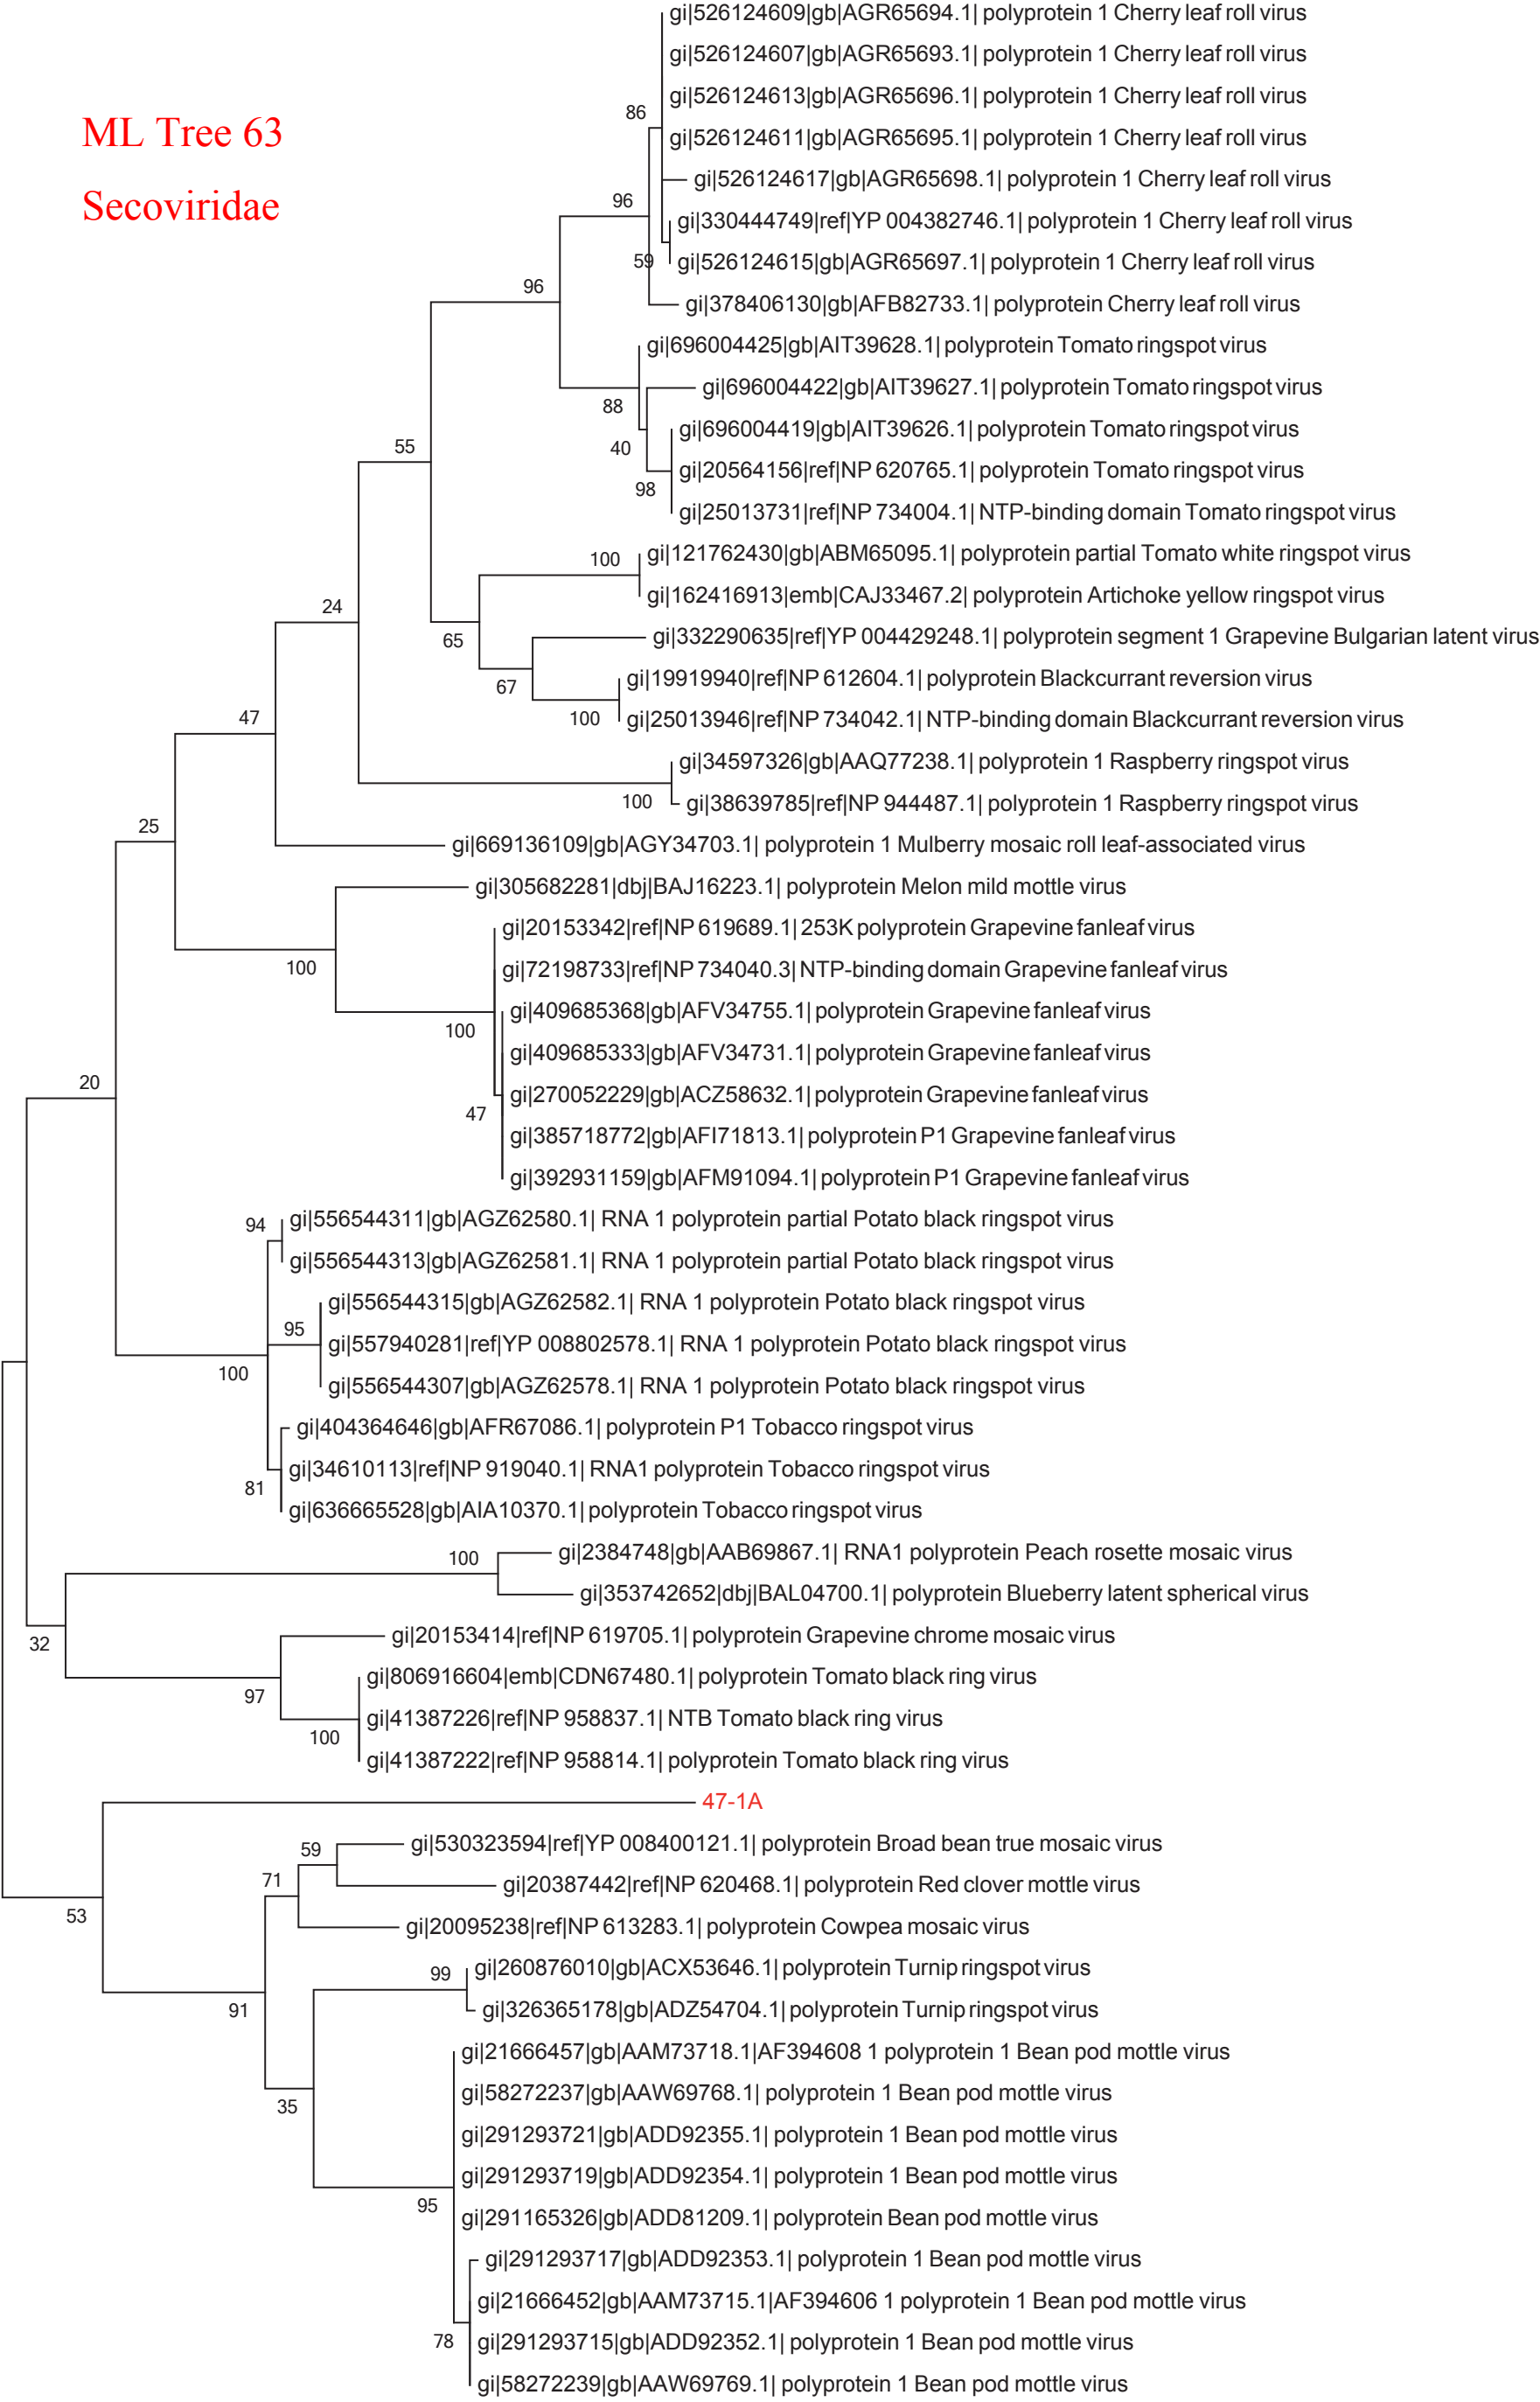

0.2

ML Tree 64

Secoviridae

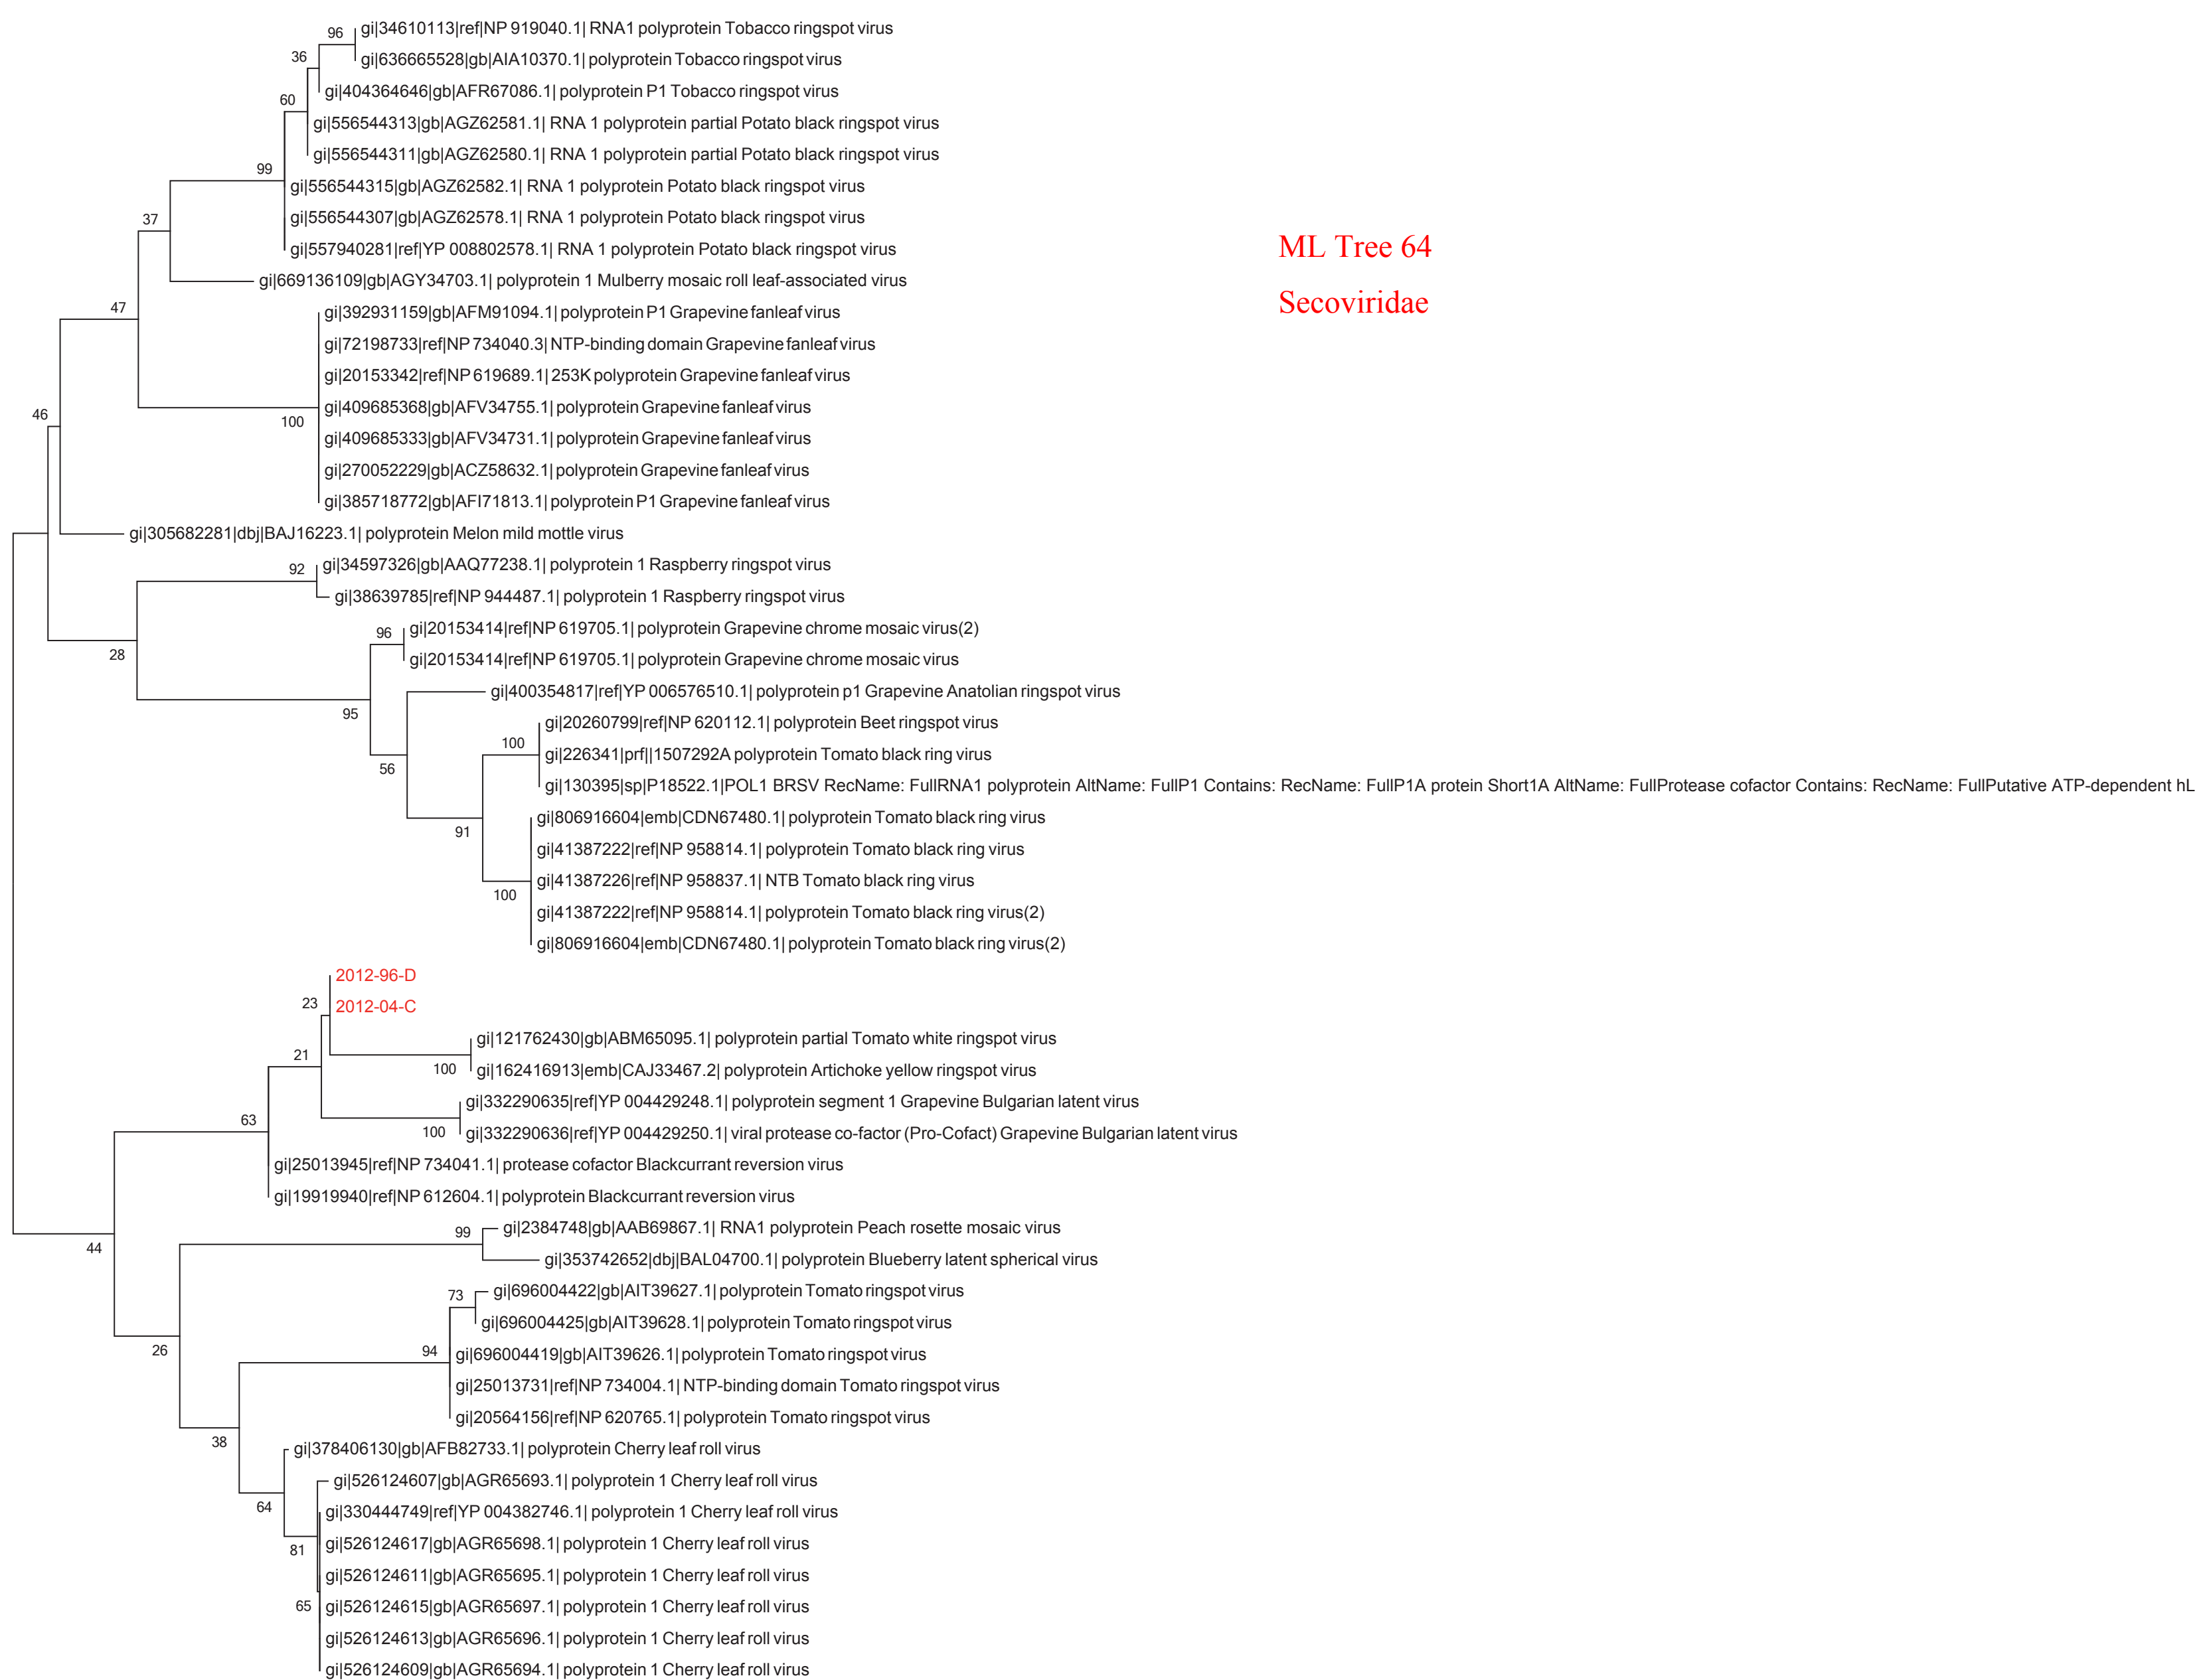

0.2

**ML Tree 65**

**Secoviridae**

99 2012-06-C  
2012-14-D

- gi|19919938|ref|NP 612586.1| polyprotein Blackcurrant reversion virus
- 100 gi|50557454|ref|NP 733981.2| movement protein Blackcurrant reversion virus
- gi|332290642|ref|YP 004429249.1| polyprotein segment 2 Grapevine Bulgarian latent virus
- 100 gi|332290644|ref|YP 004429256.1| movement protein (MP) Grapevine Bulgarian latent virus

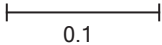

# ML Tree 66

## Secoviridae

86

61

gi|2384748|gb|AAB69867.1| RNA1 polyprotein Peach rosette mosaic virus

gi|353742652|dbj|BAL04700.1| polyprotein Blueberry latent spherical virus

1J-021

100

gi|696004422|gb|AIT39627.1| polyprotein Tomato ringspot virus

gi|696004419|gb|AIT39626.1| polyprotein Tomato ringspot virus

gi|20564156|ref|NP\_620765.1| polyprotein Tomato ringspot virus

gi|409685368|gb|AFV34755.1| polyprotein Grapevine fanleaf virus

27

gi|162416913|emb|CAJ33467.2| polyprotein Artichoke yellow ringspot virus

22

gi|19919940|ref|NP\_612604.1| polyprotein Blackcurrant reversion virus

65

gi|332290635|ref|YP\_004429248.1| polyprotein segment 1 Grapevine Bulgarian latent virus

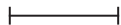

0.2



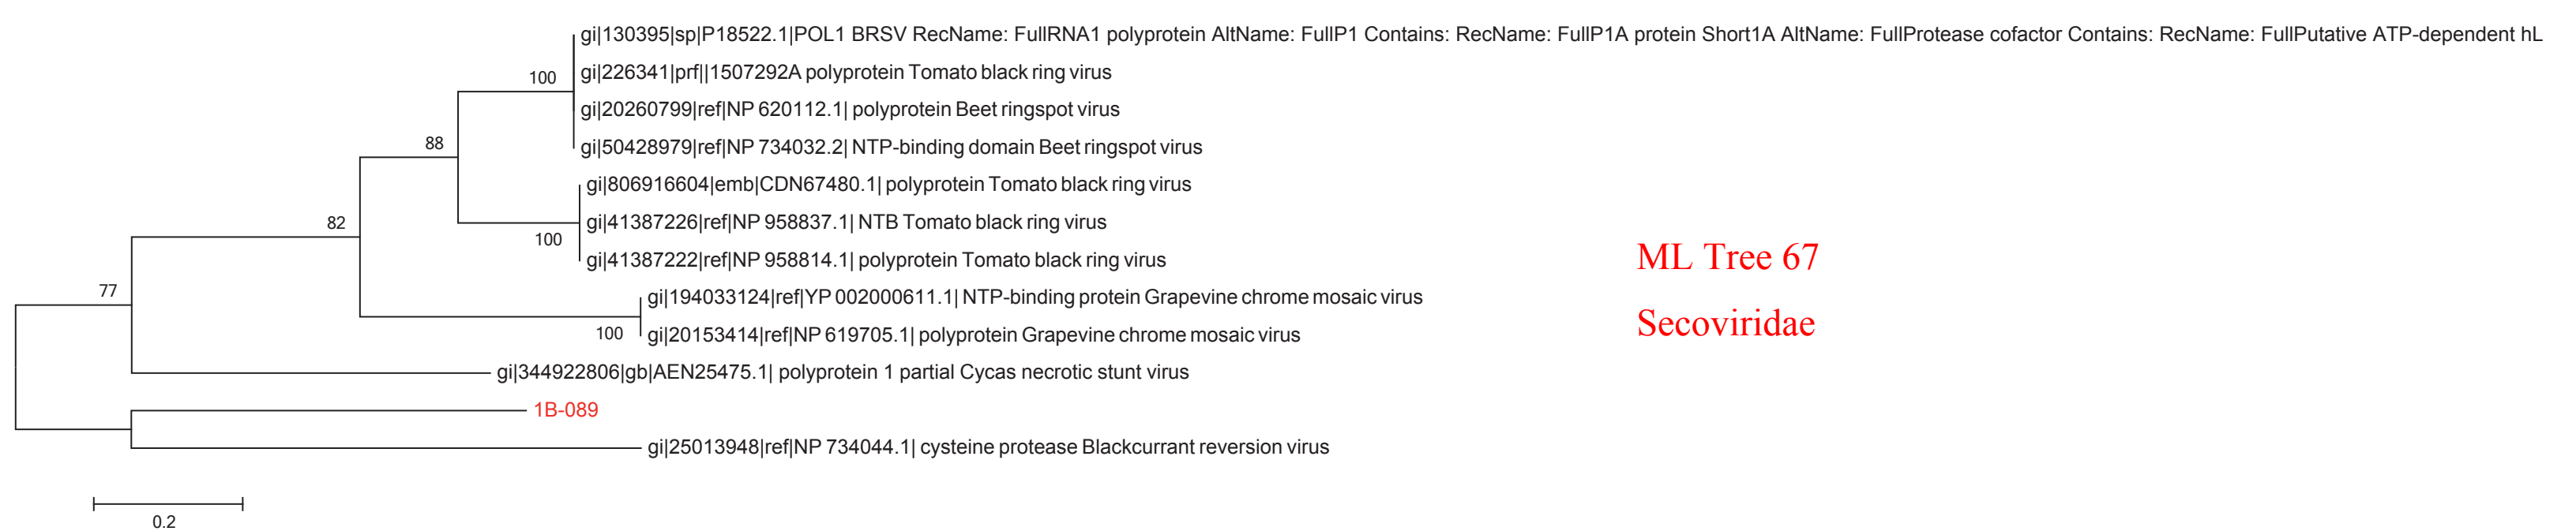

ML Tree 68

Secoviridae

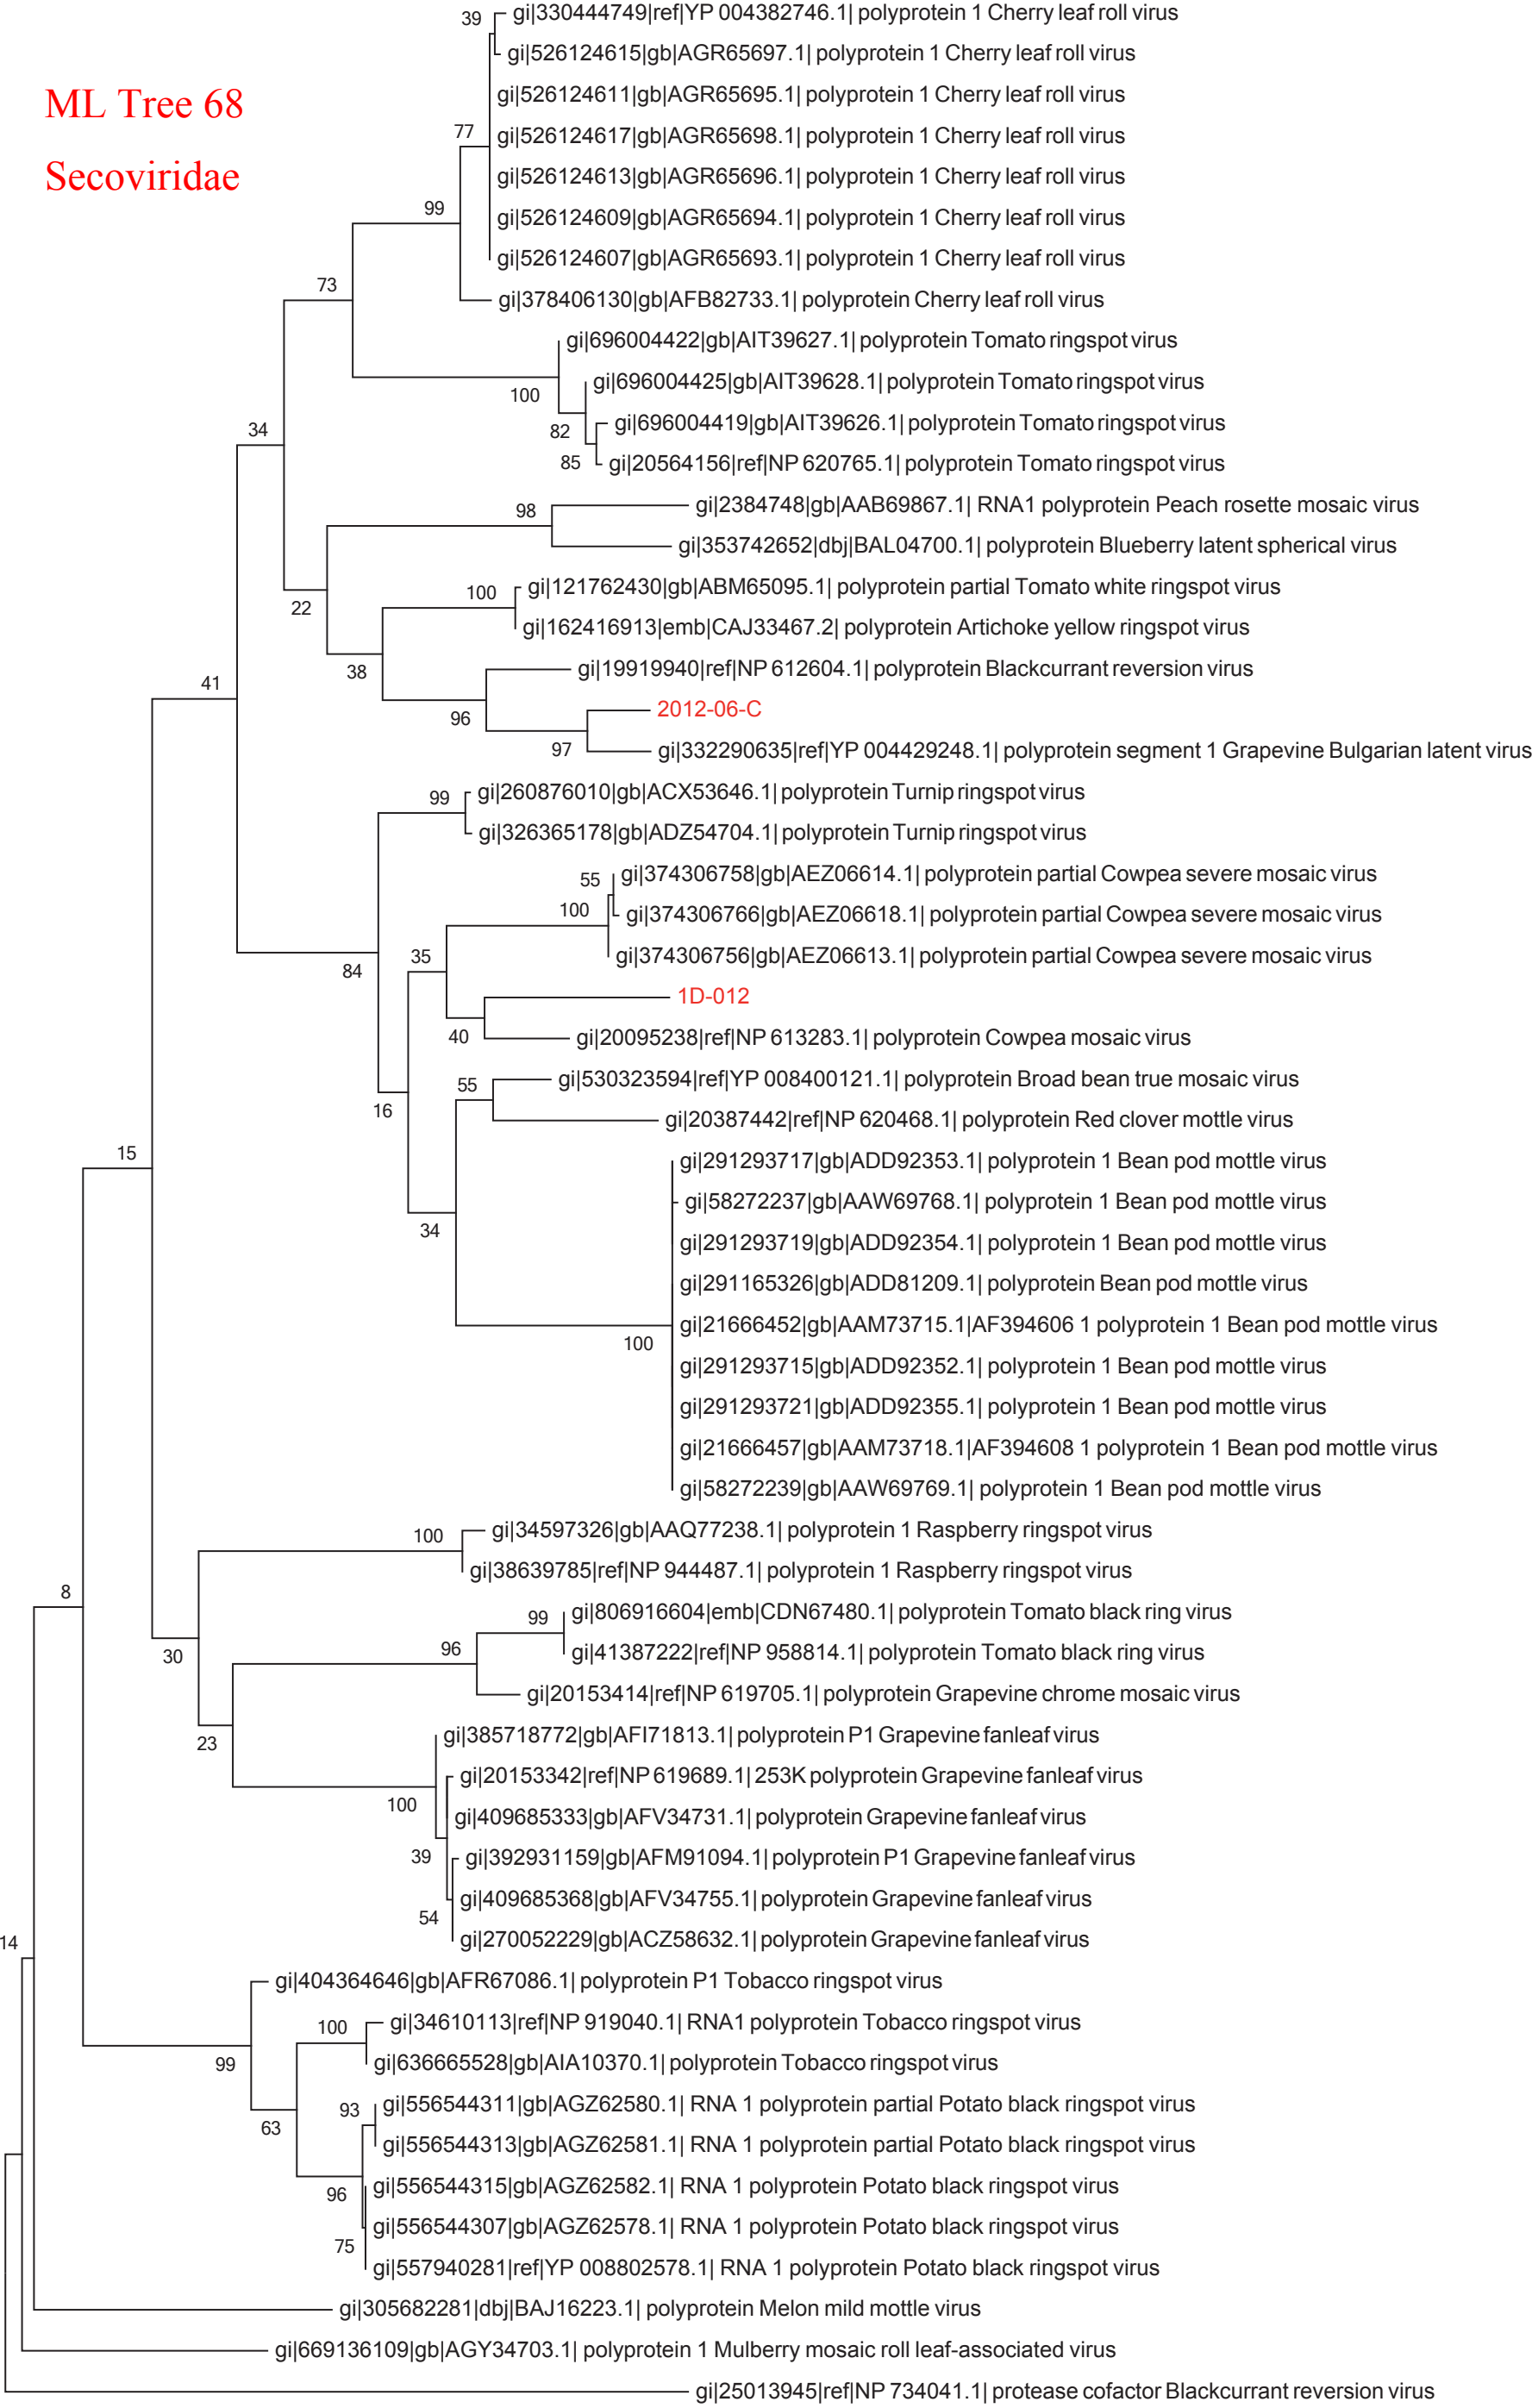

0.5

ML Tree 69  
Sobemovirus

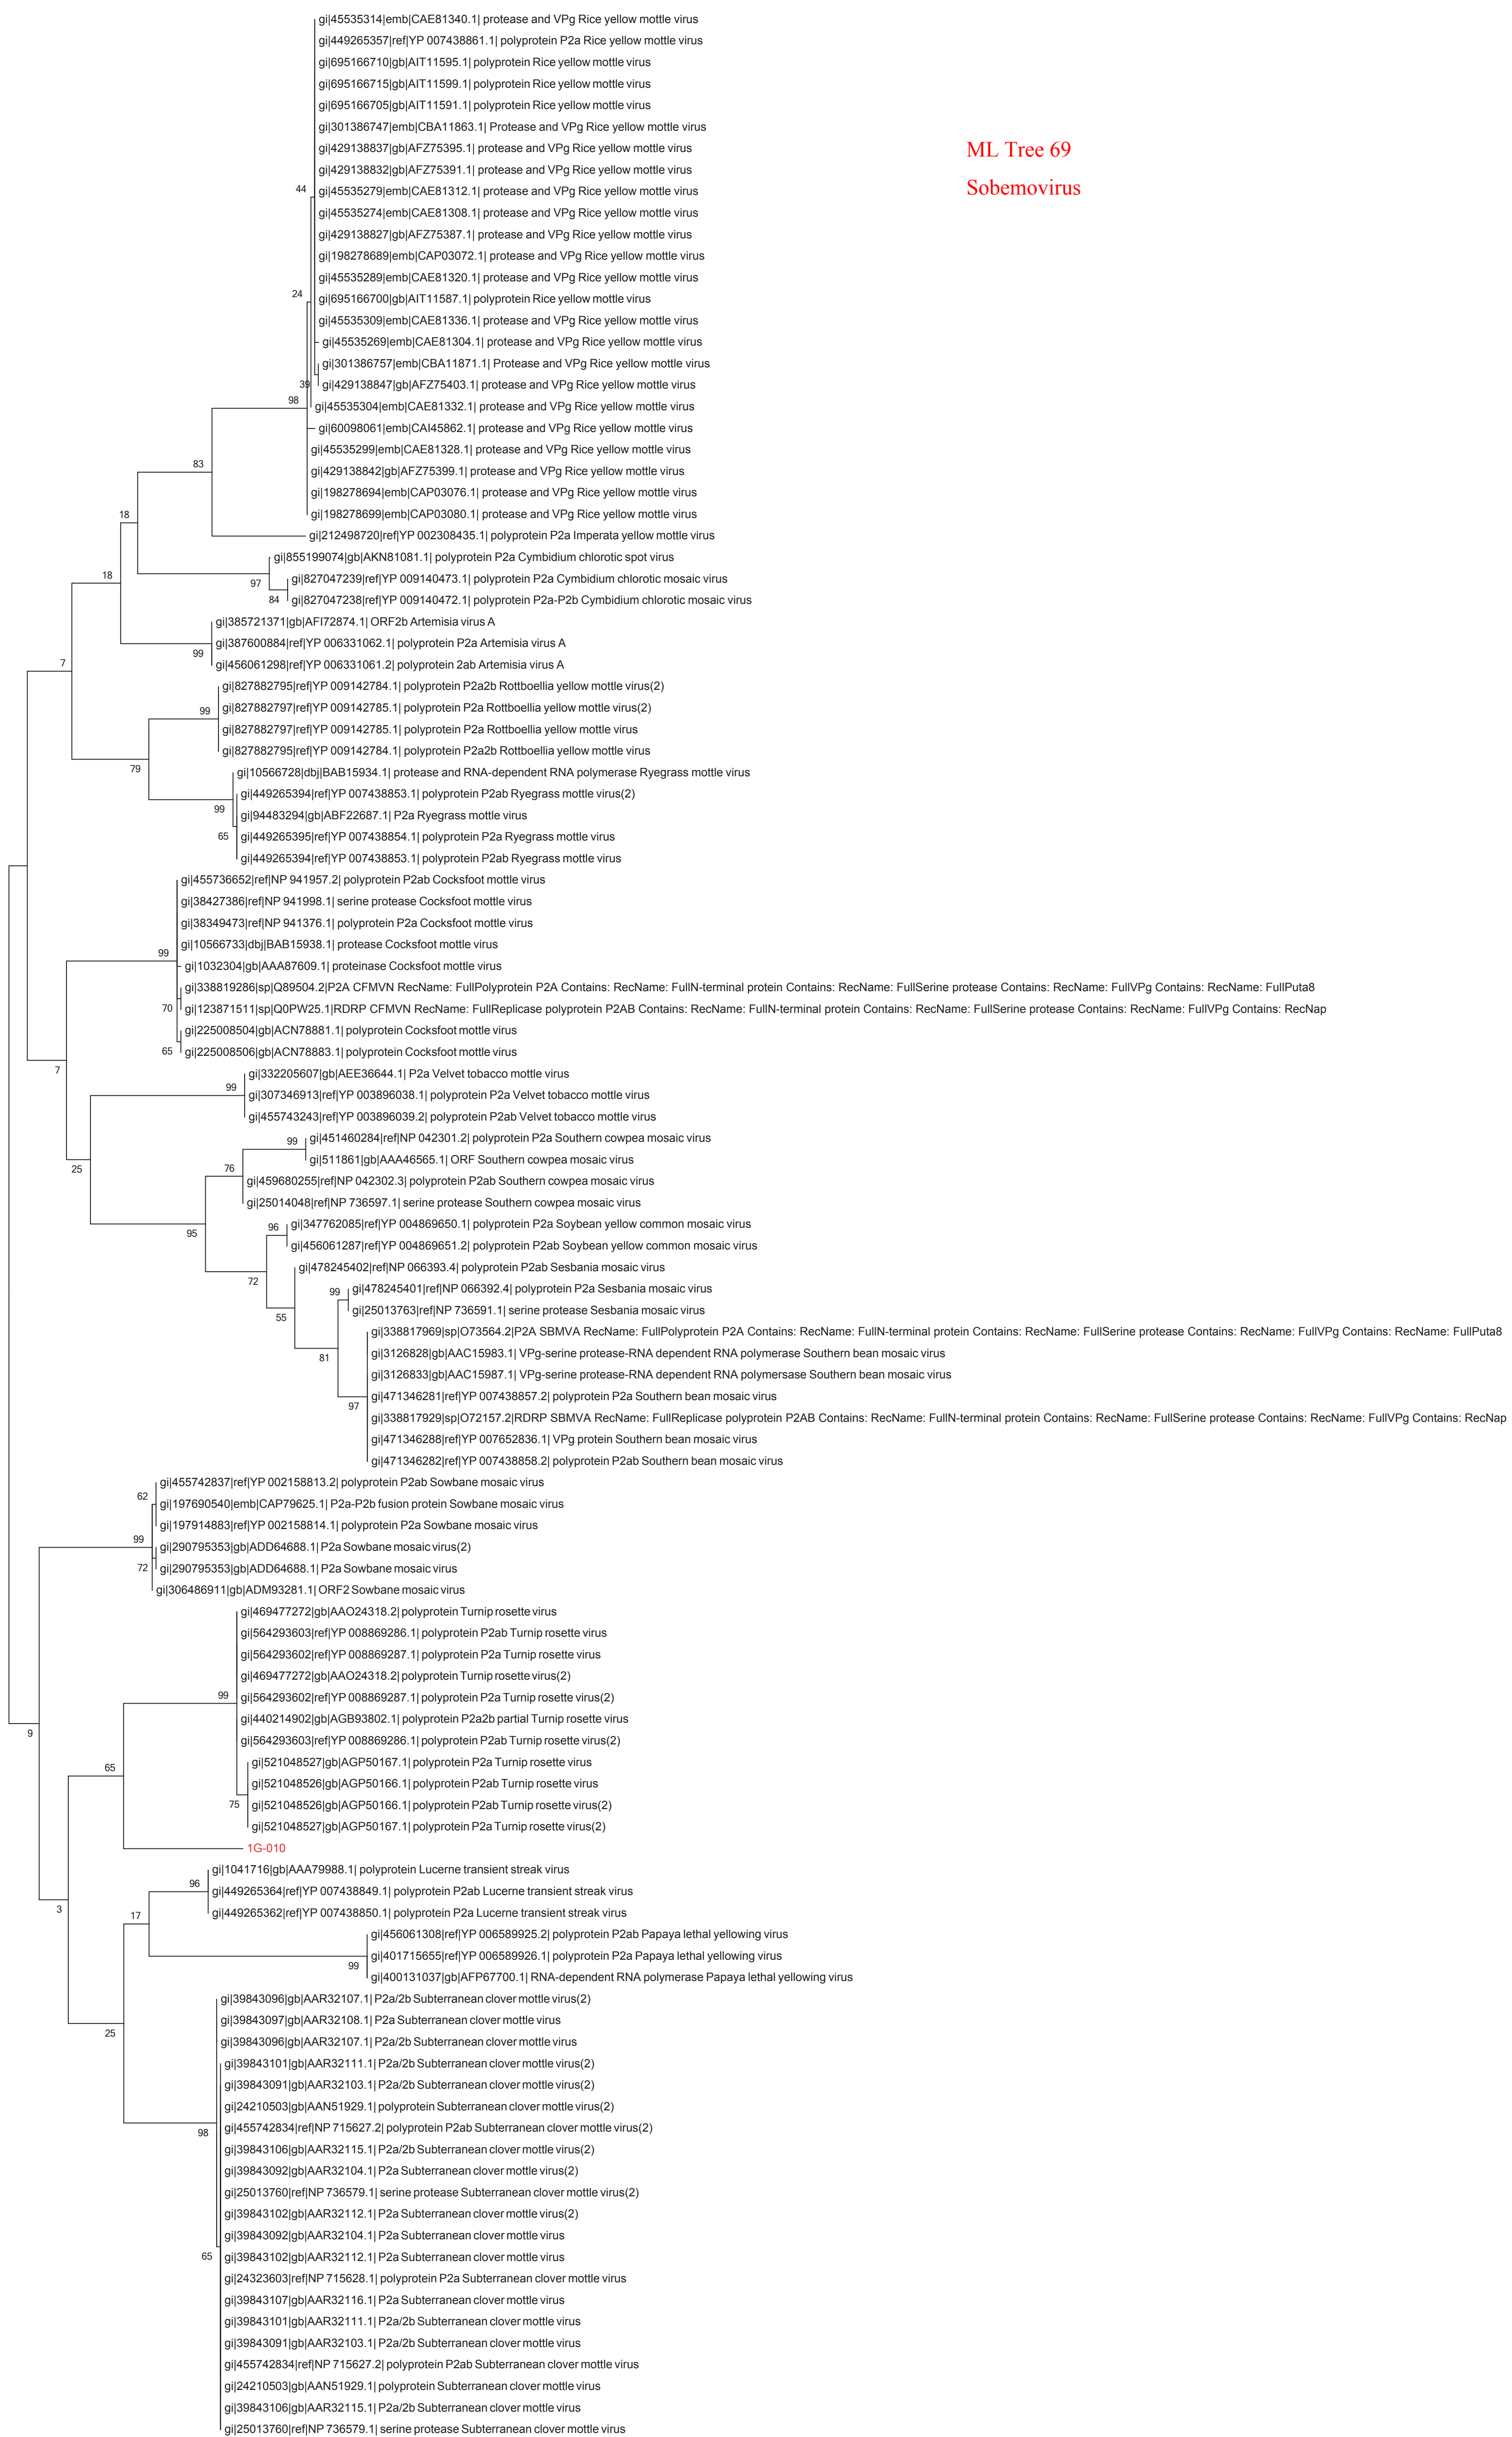



ML Tree 70  
Tombusviridae

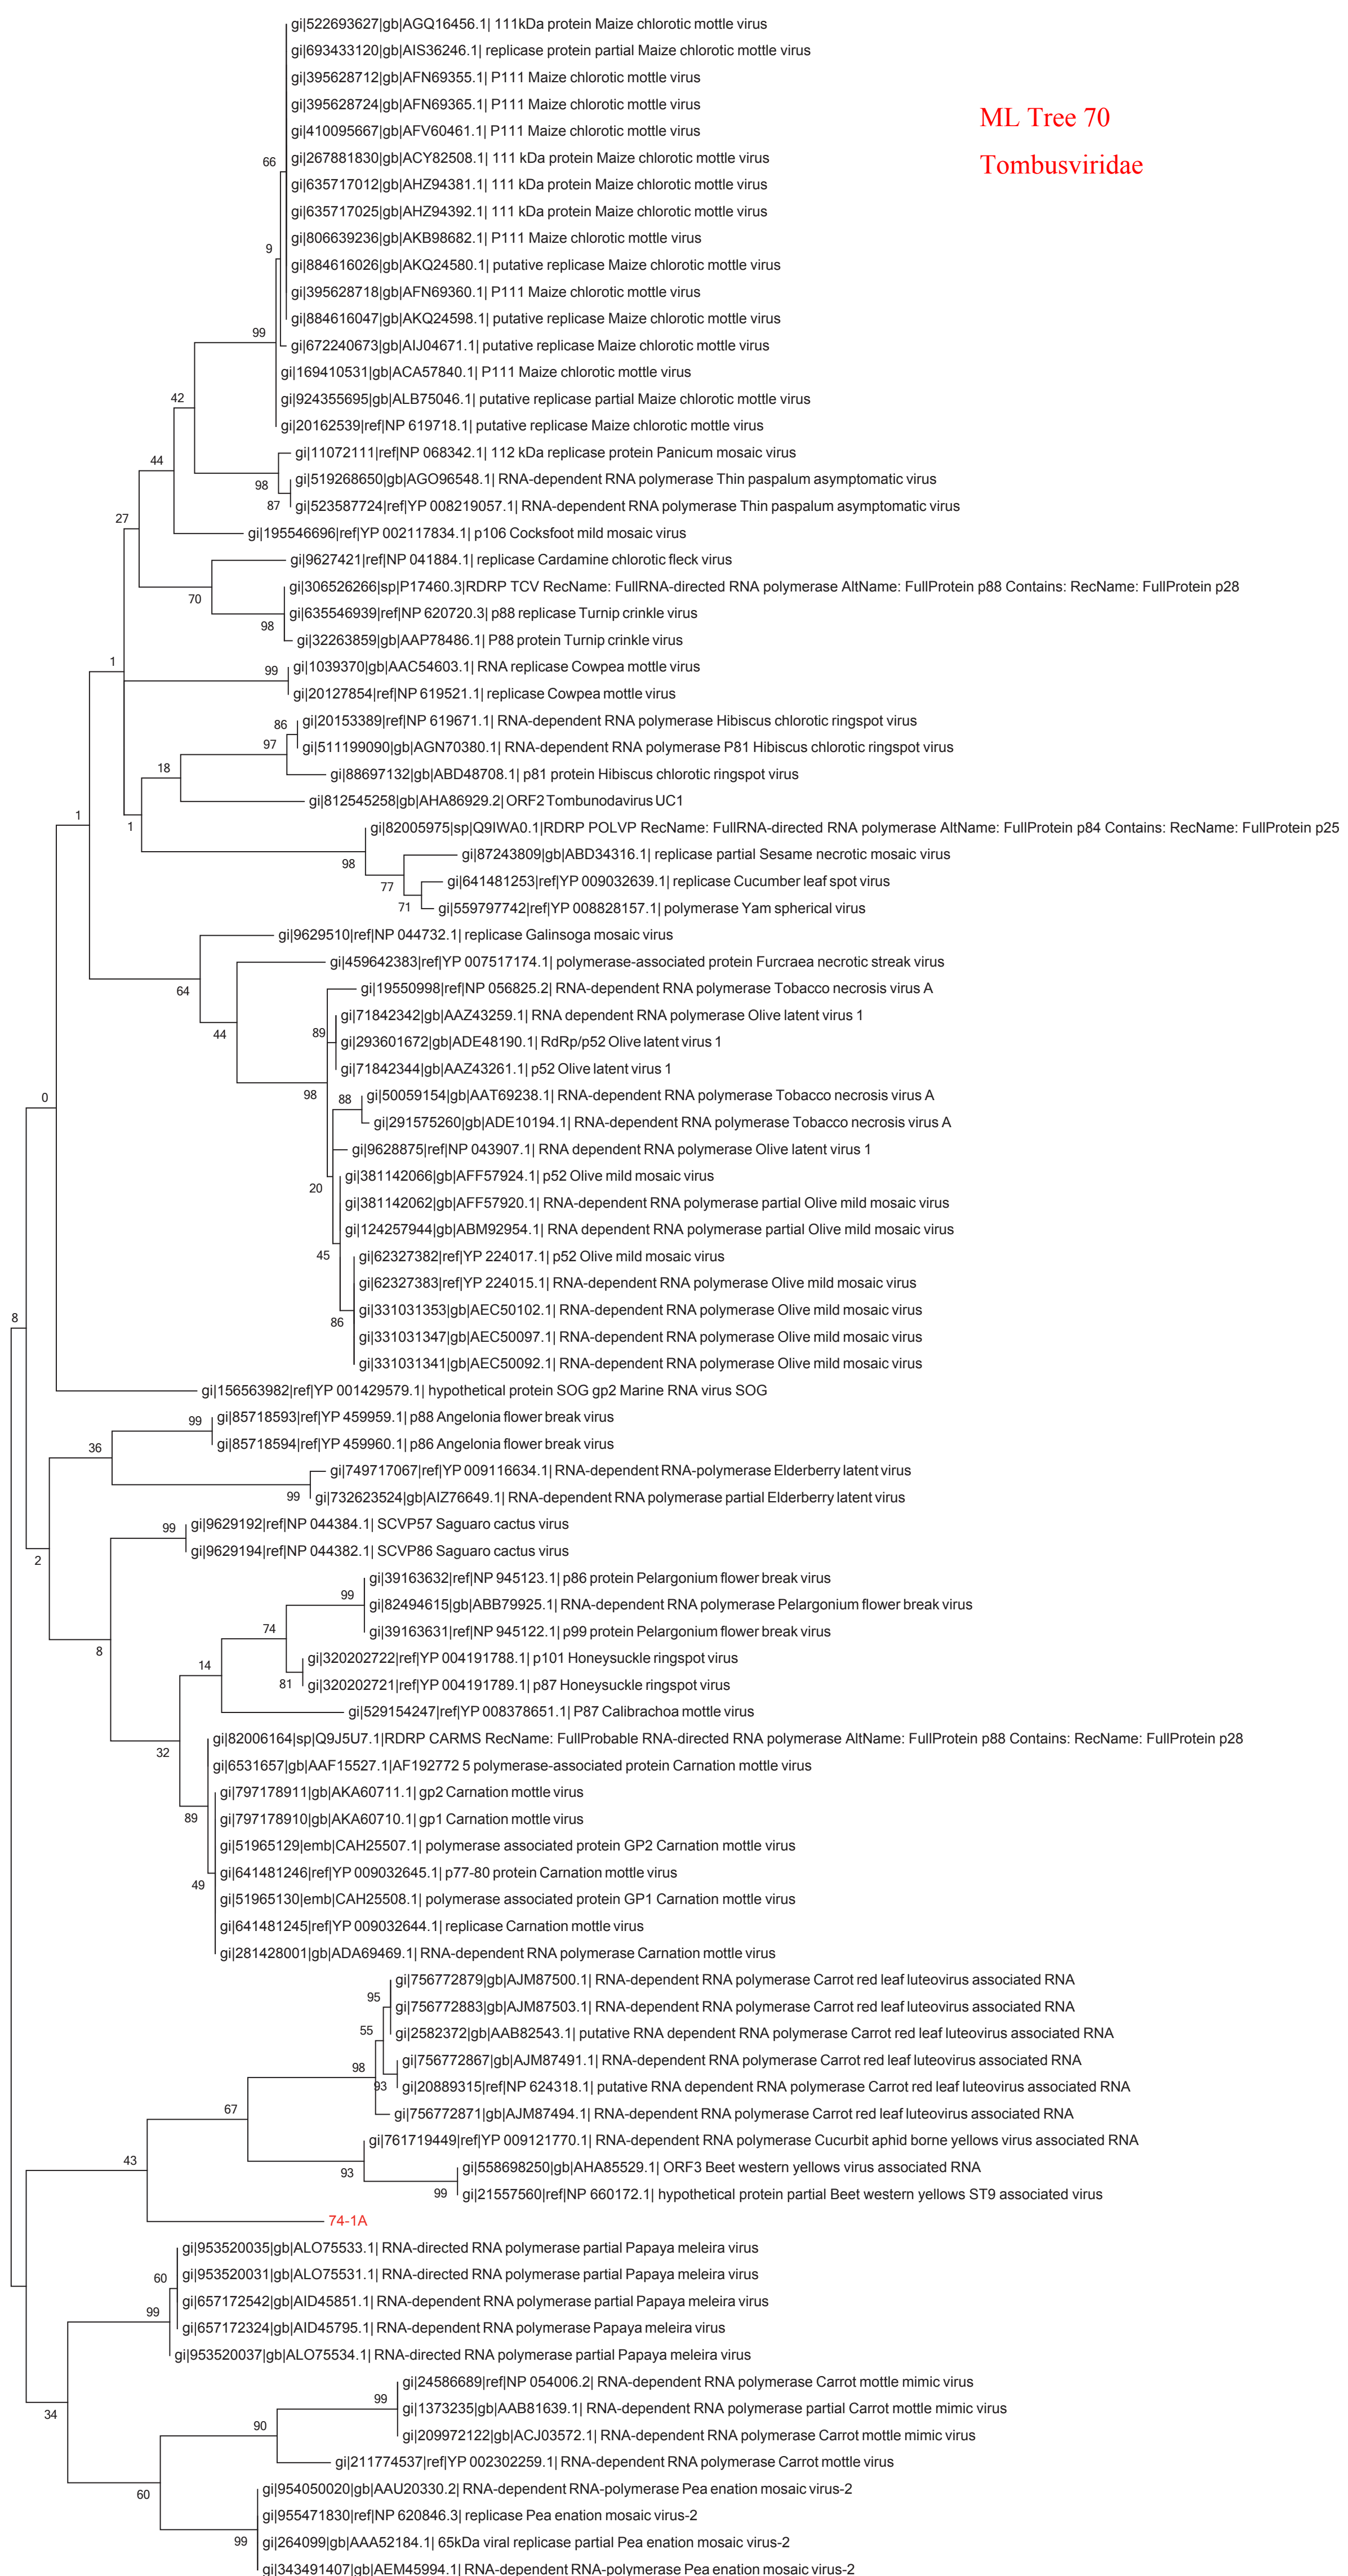

0.2



ML Tree 71  
Tombusviridae

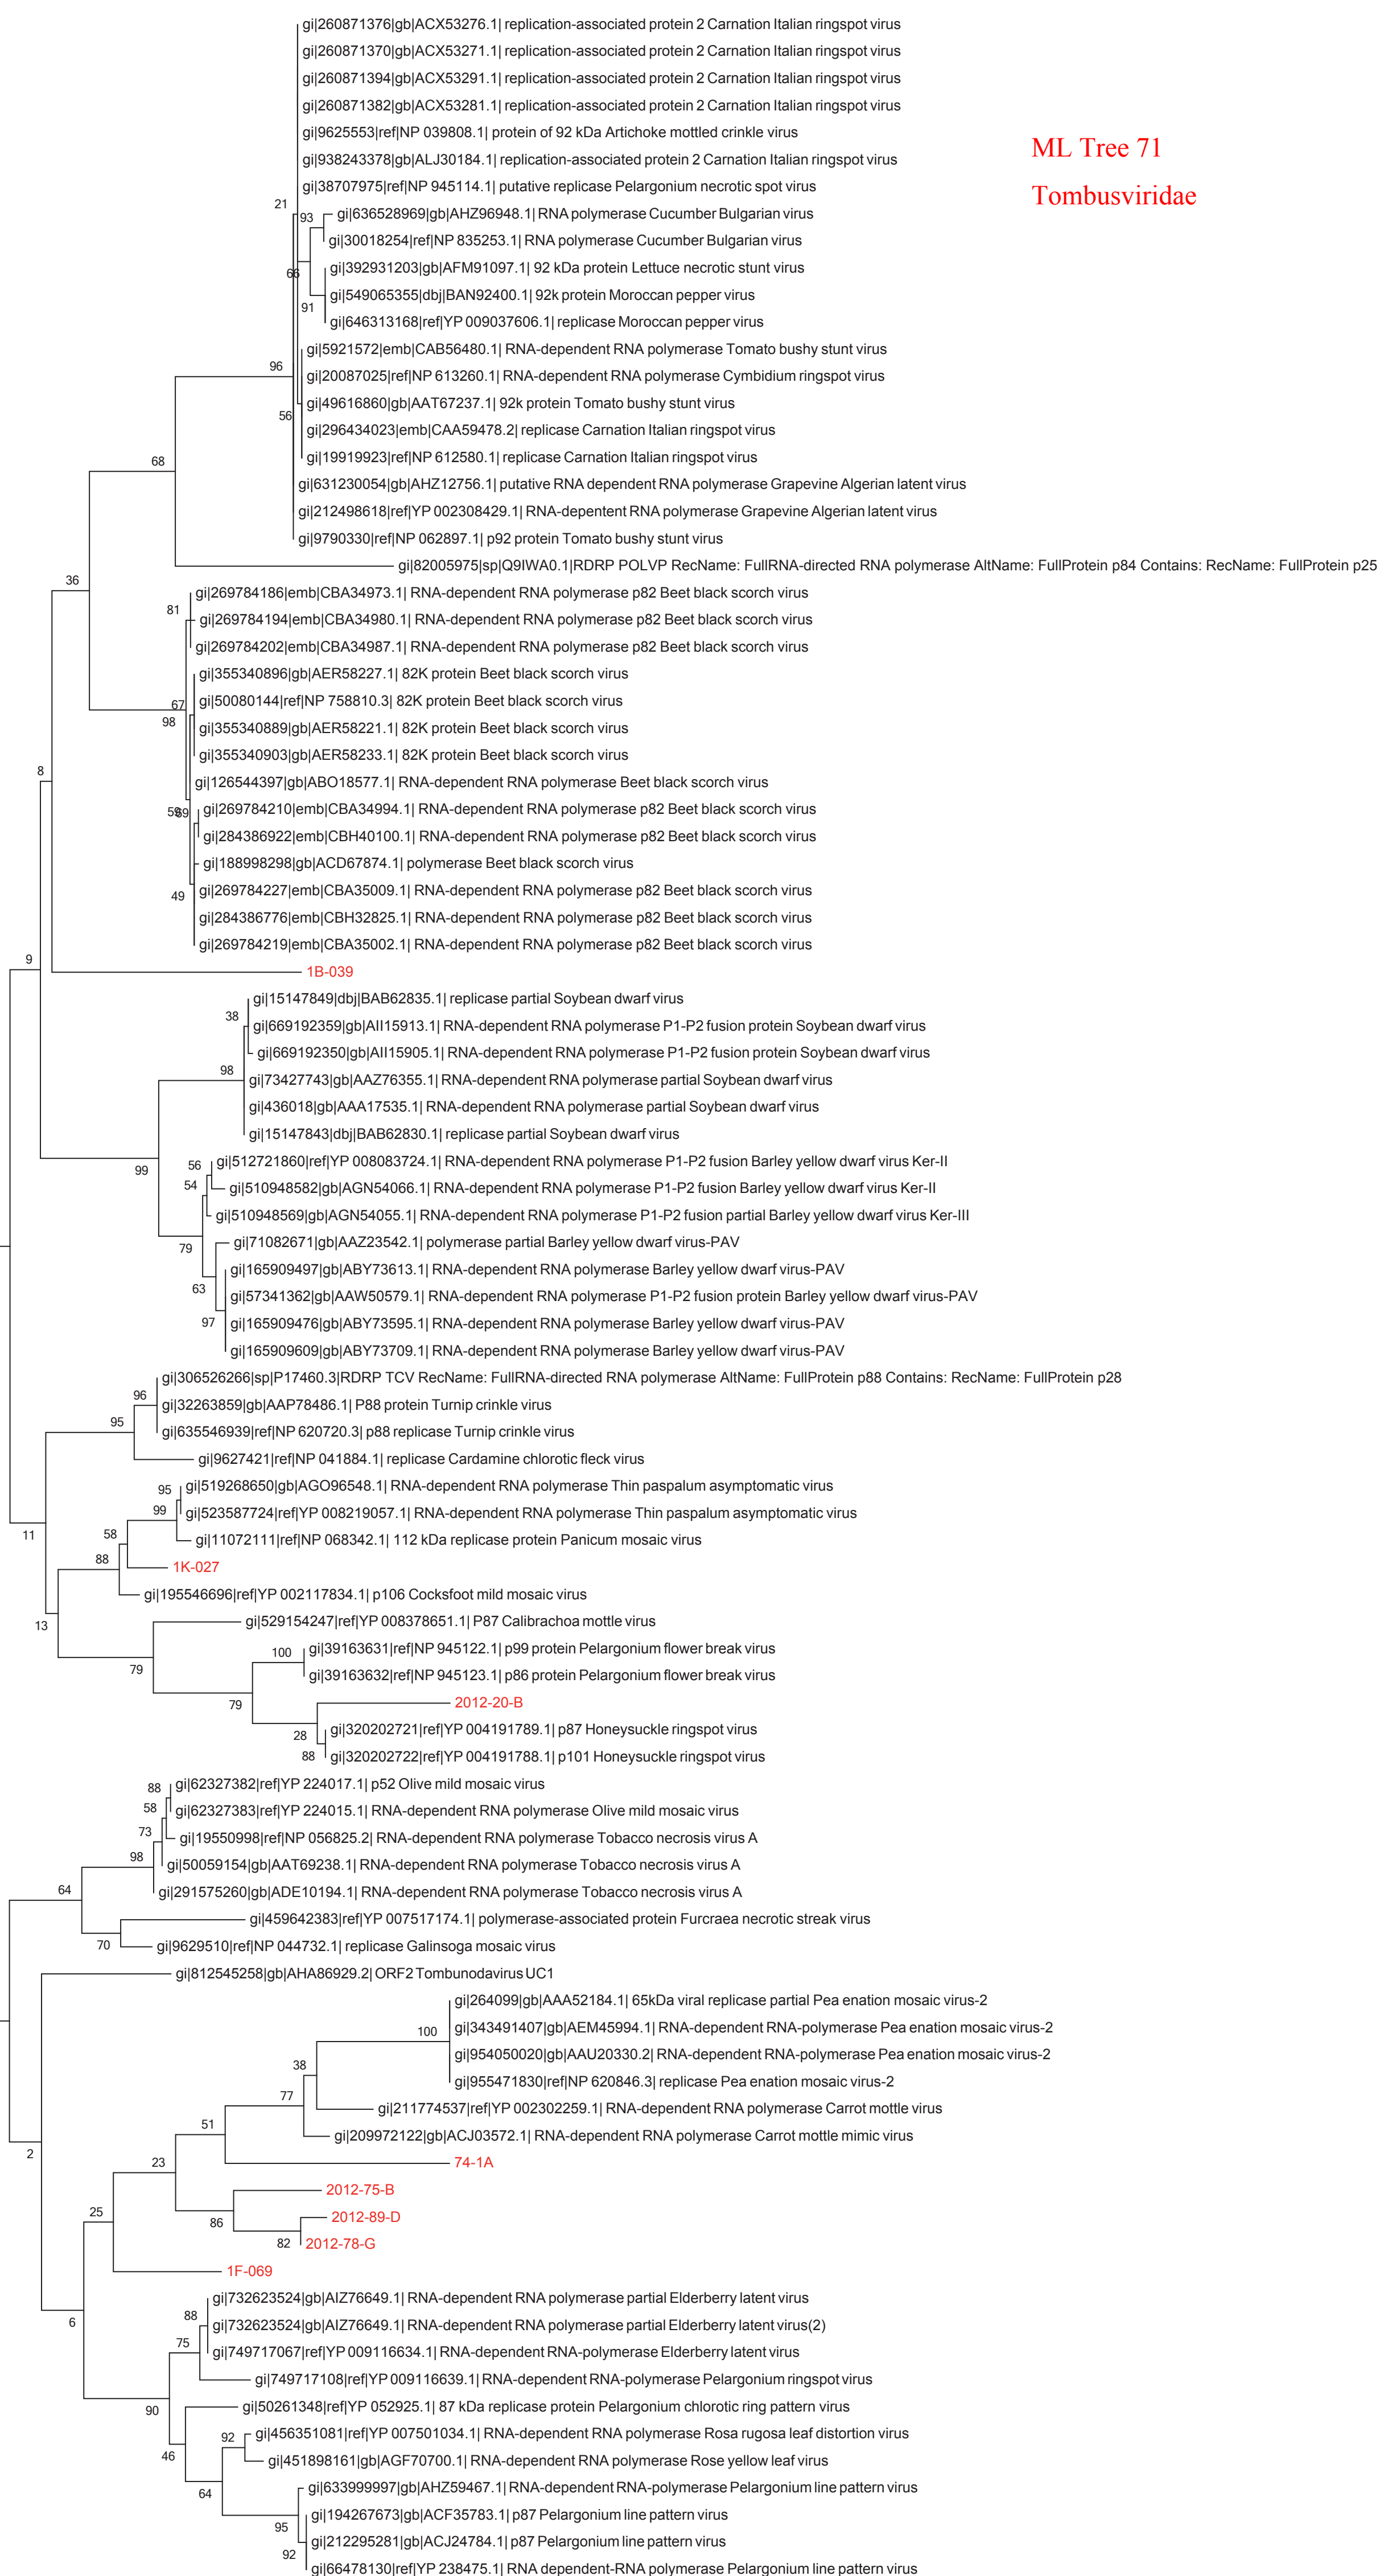

0.2

ML Tree 72  
Tombusviridae

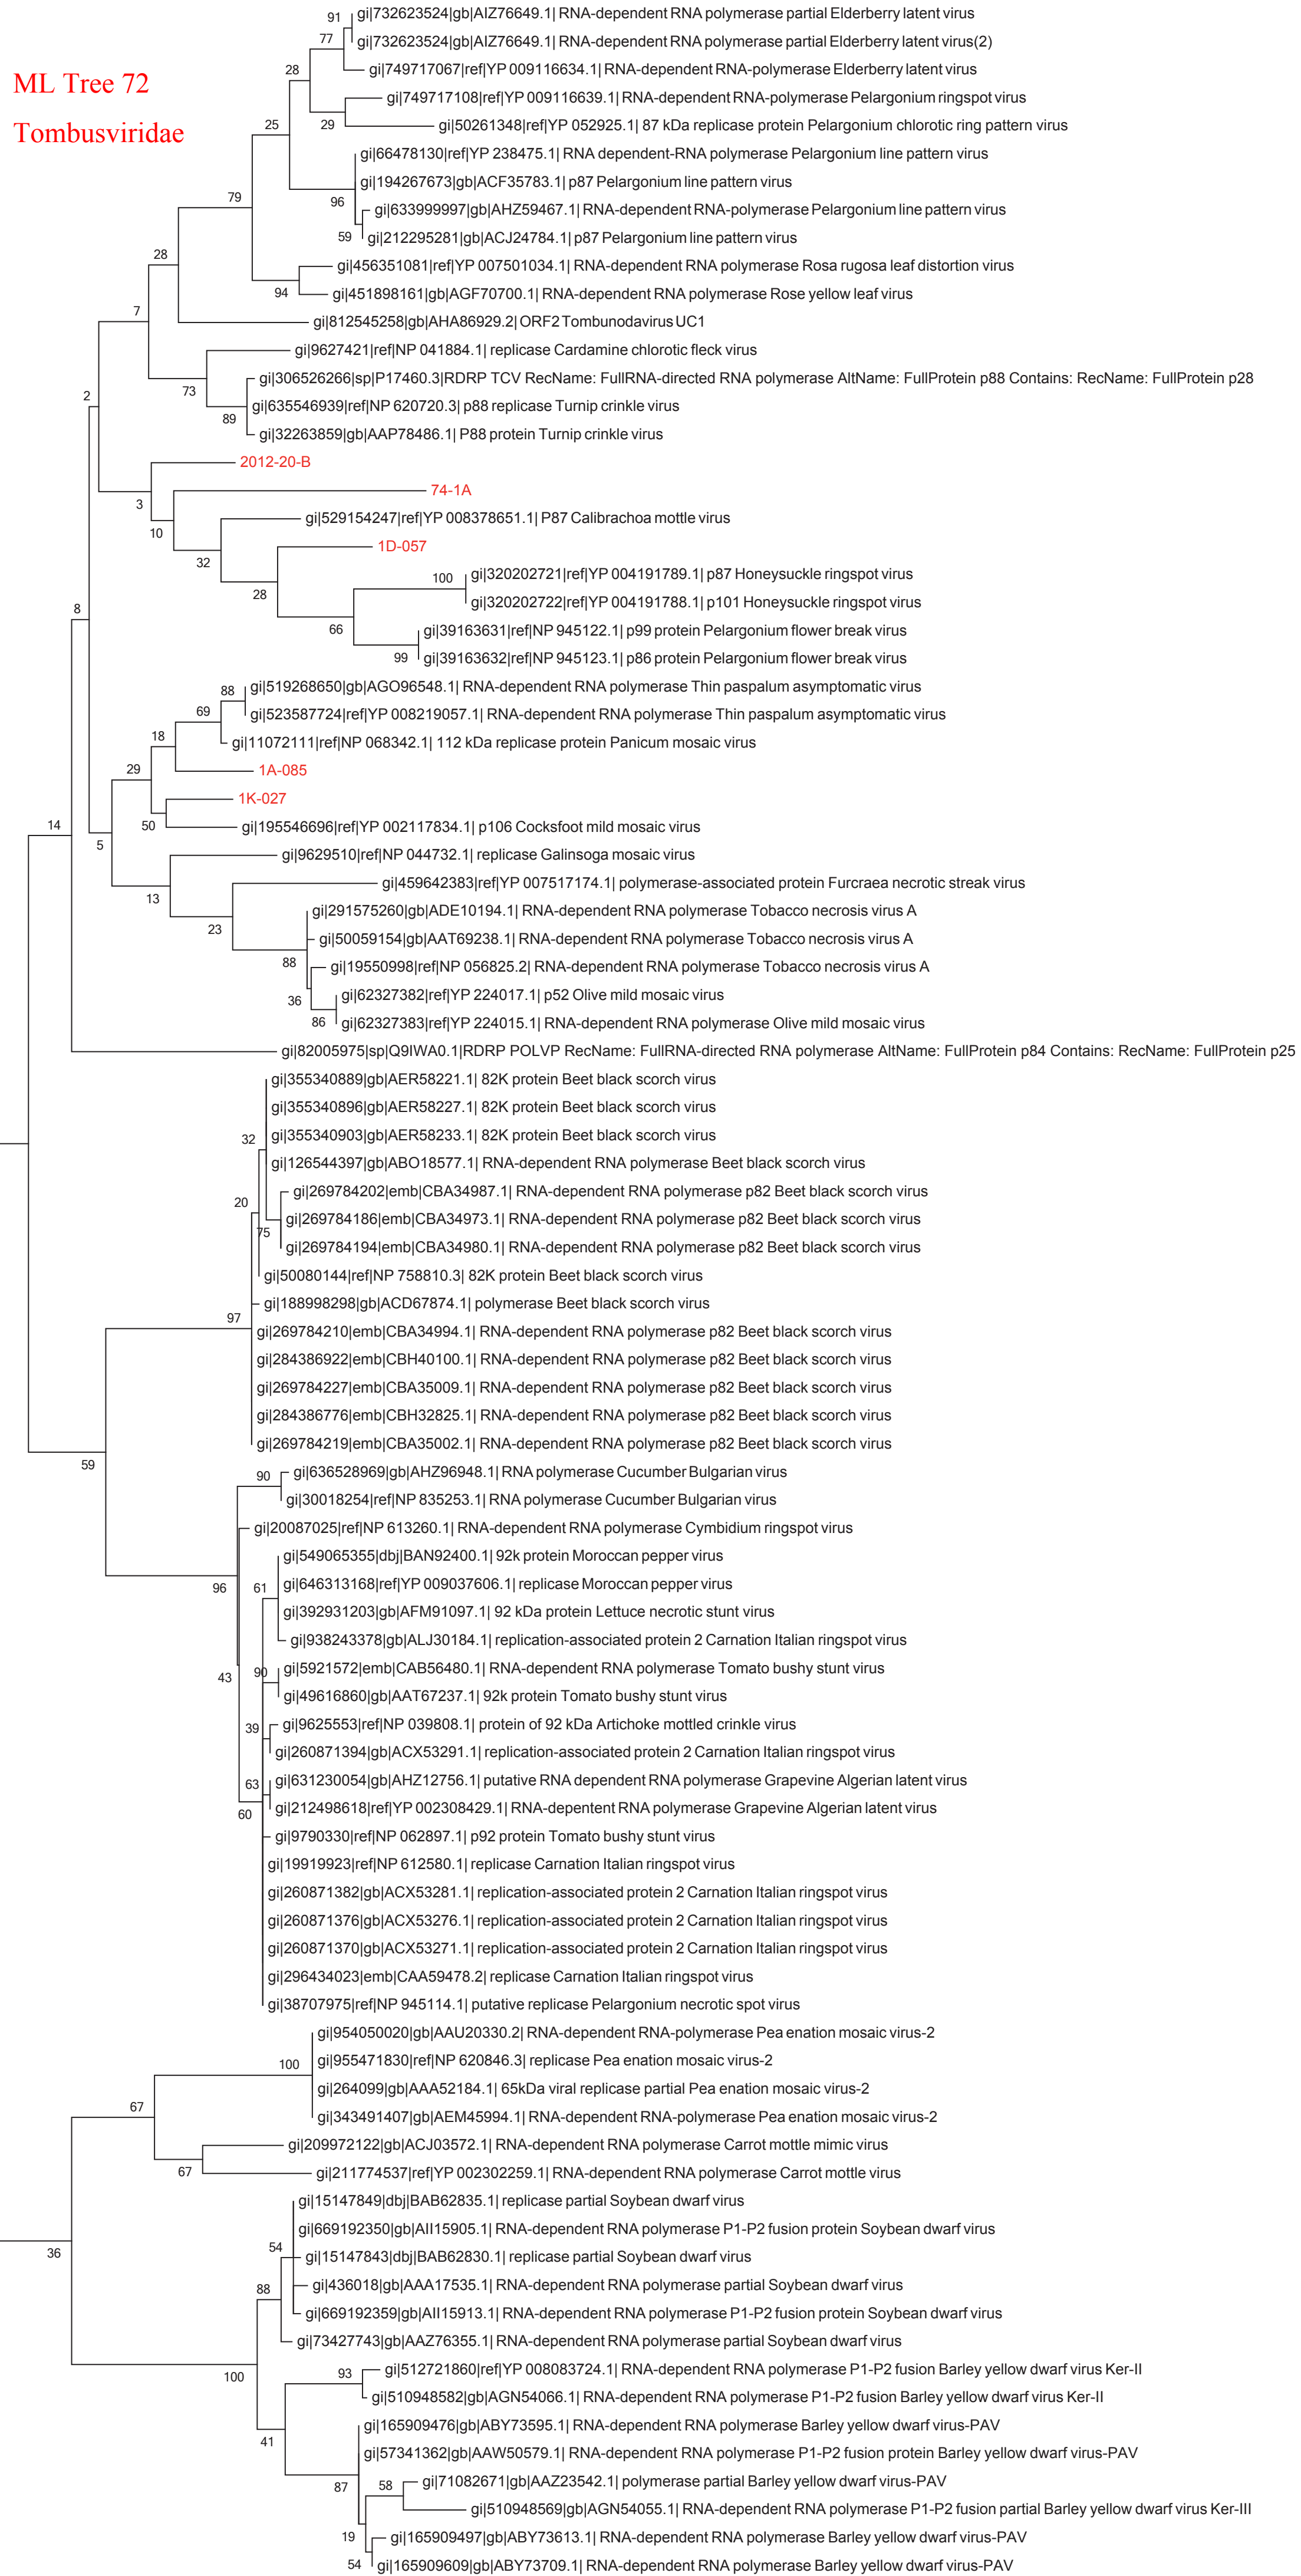

0.2



ML Tree 73

Tombusviridae

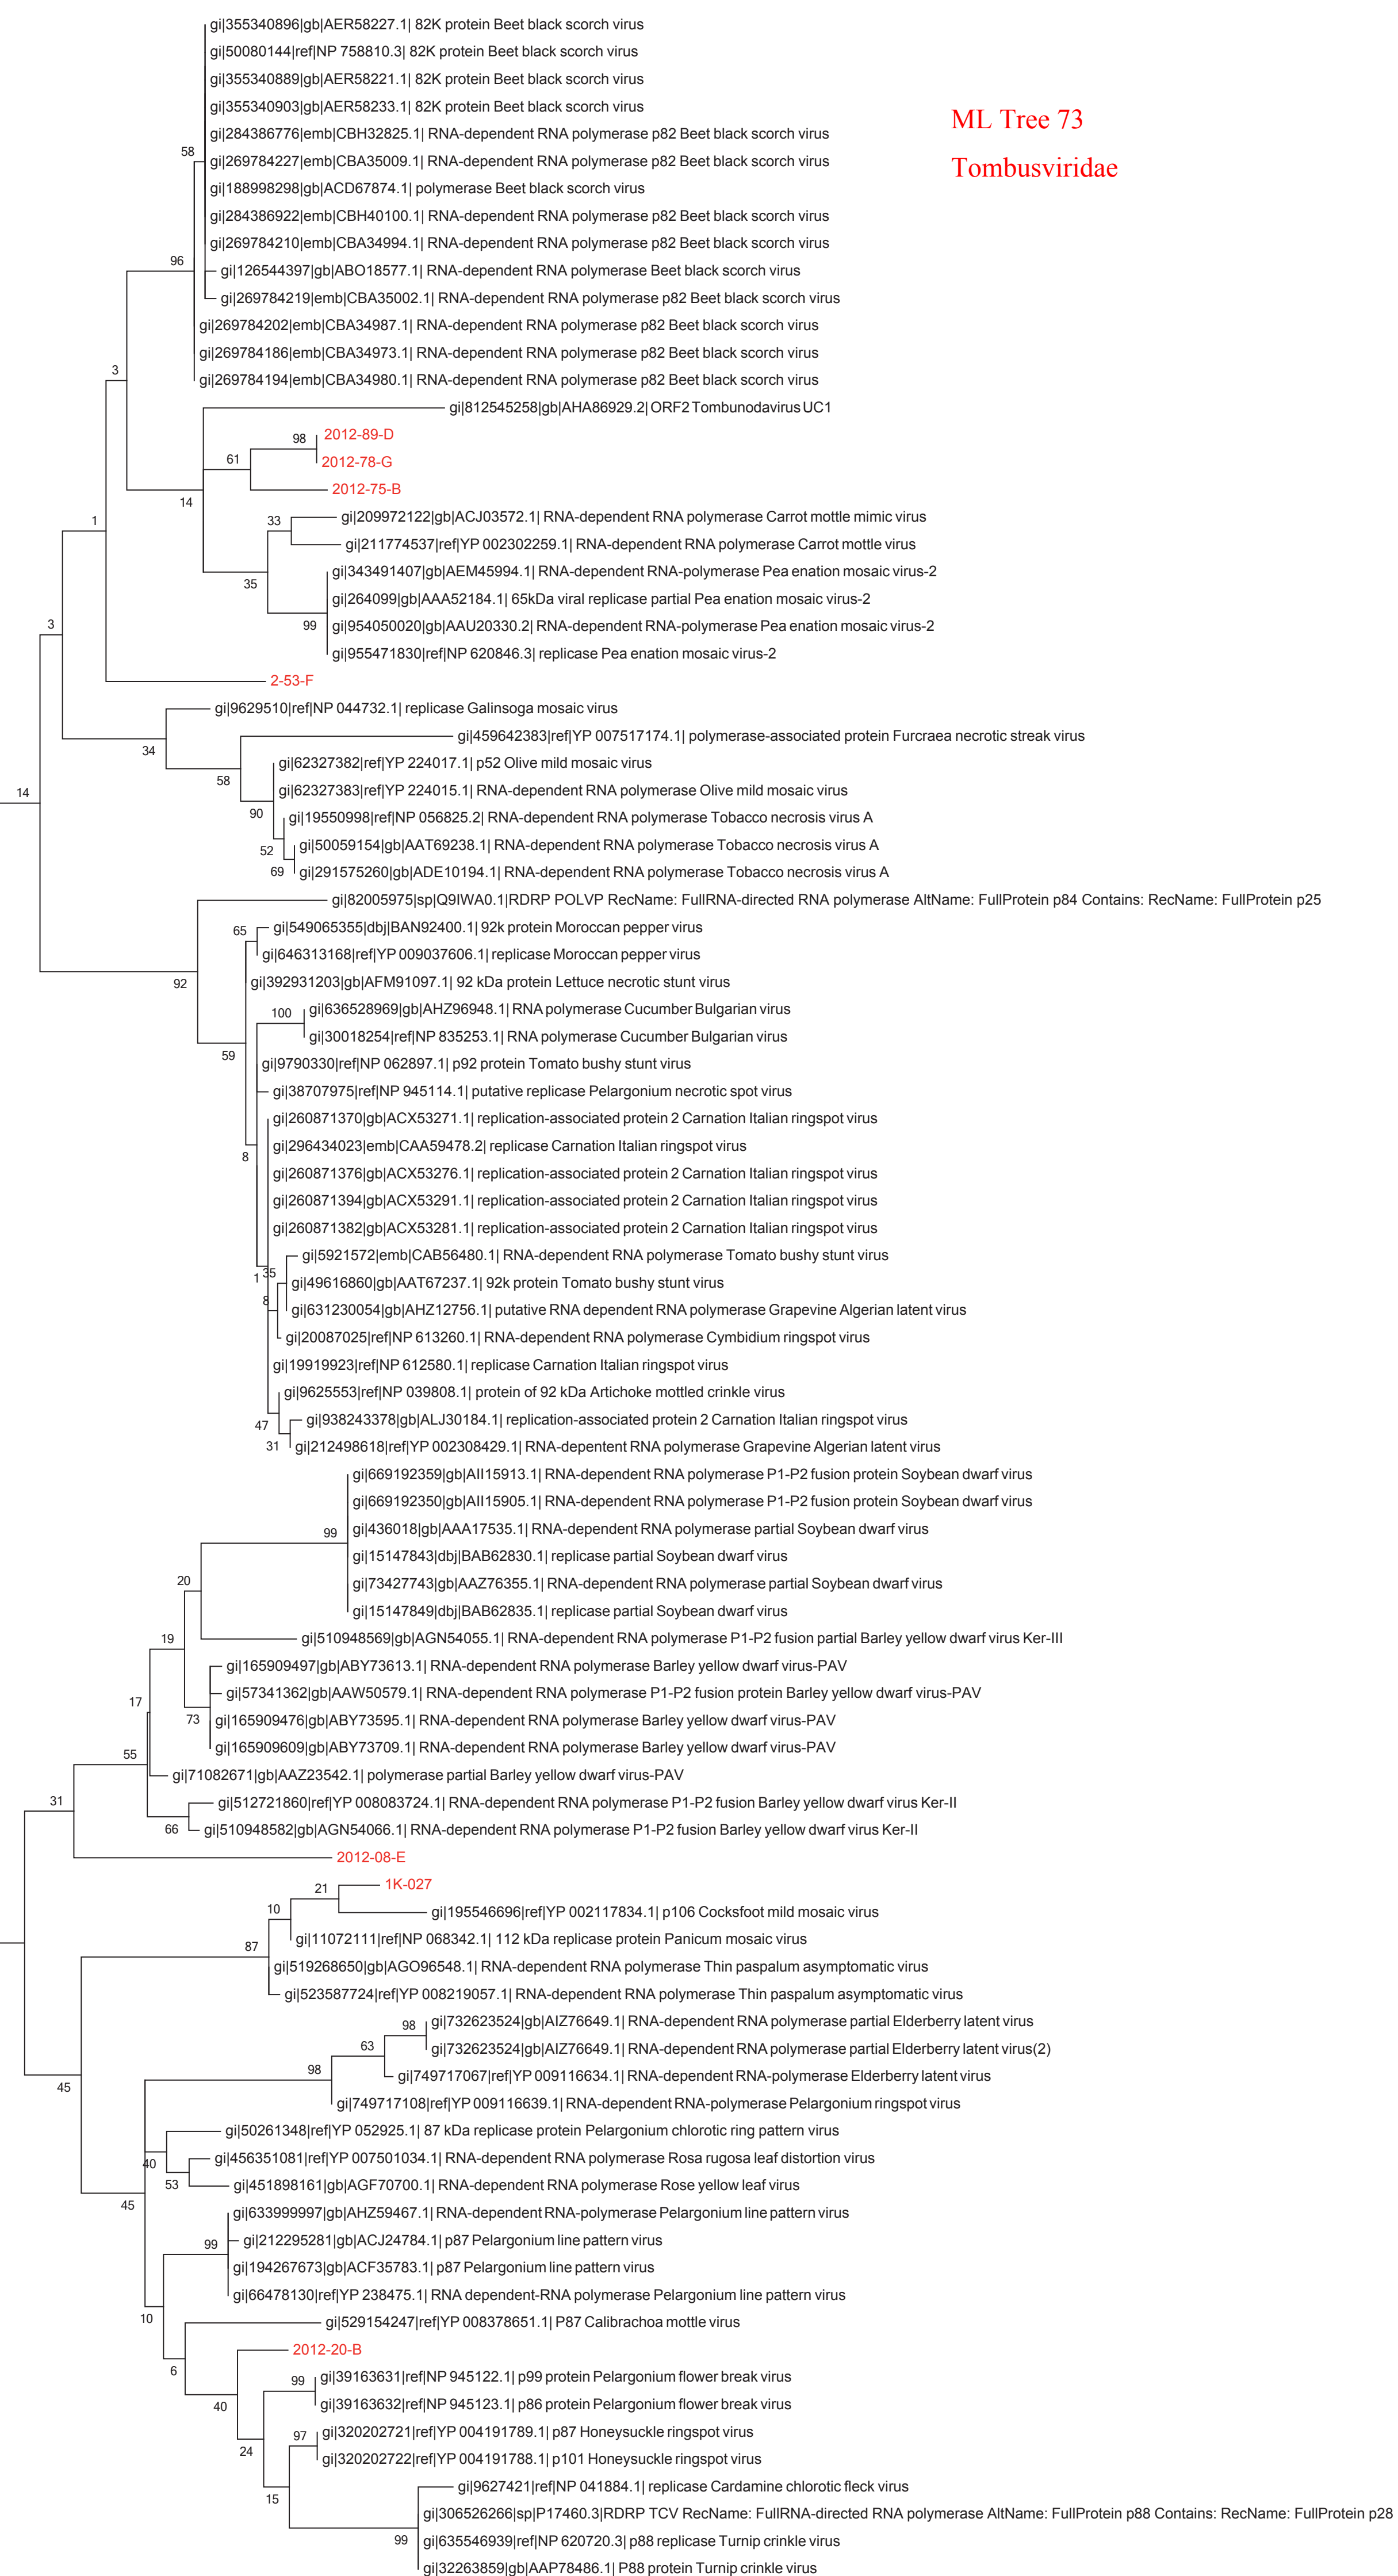

0.2

ML Tree 74  
Tombusviridae

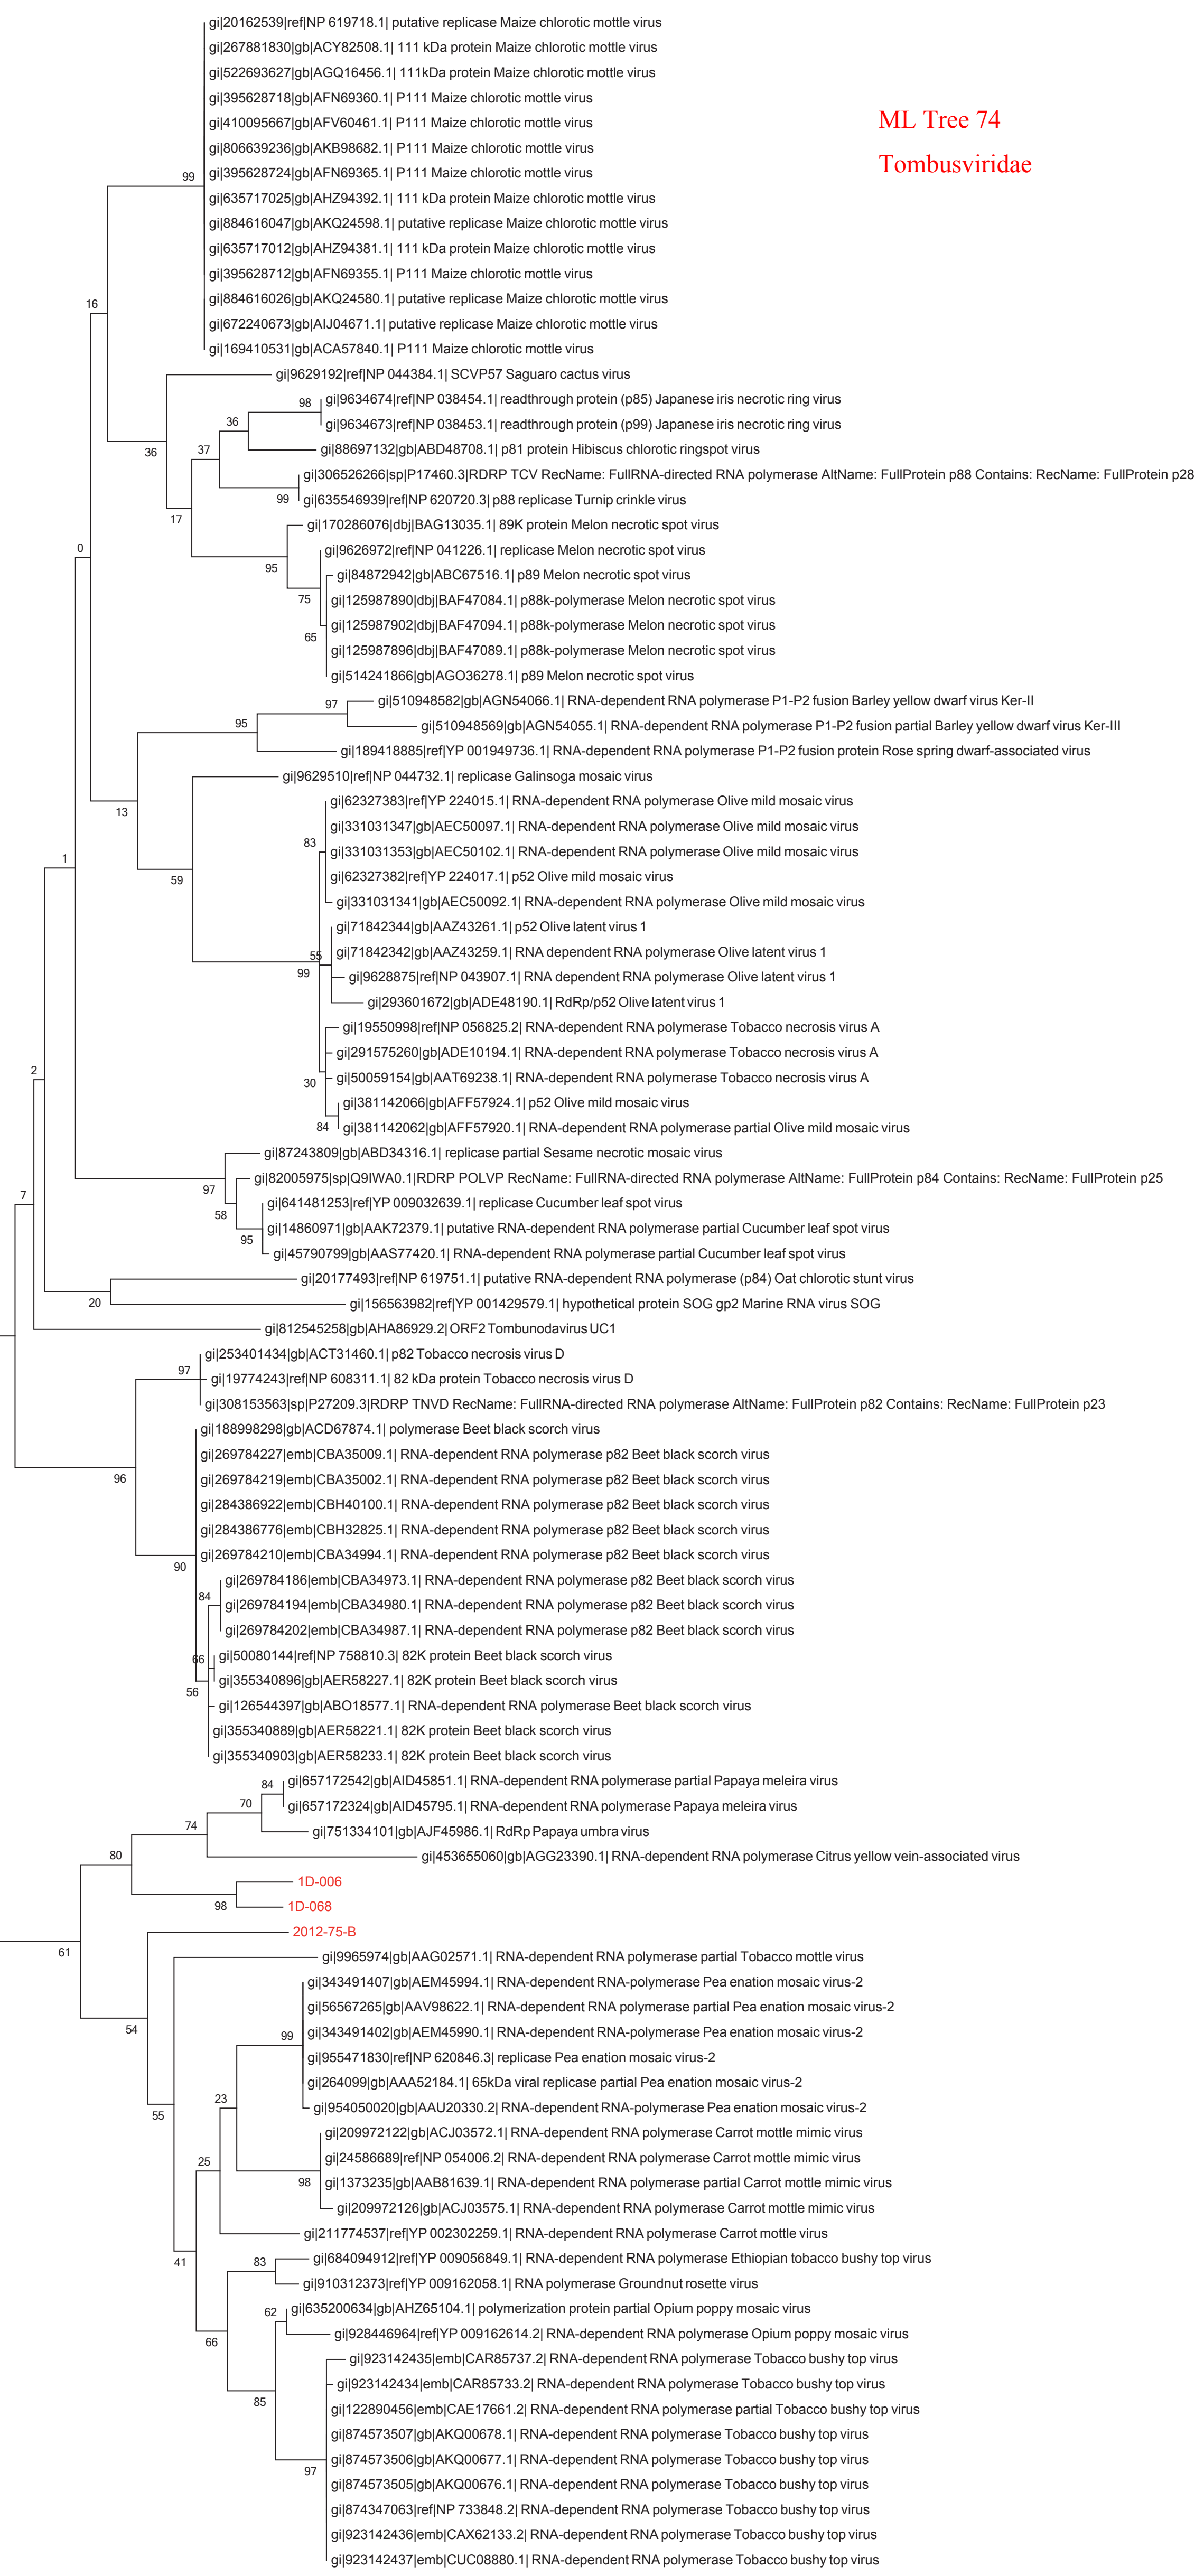

0.1



ML Tree 75  
Tombusviridae

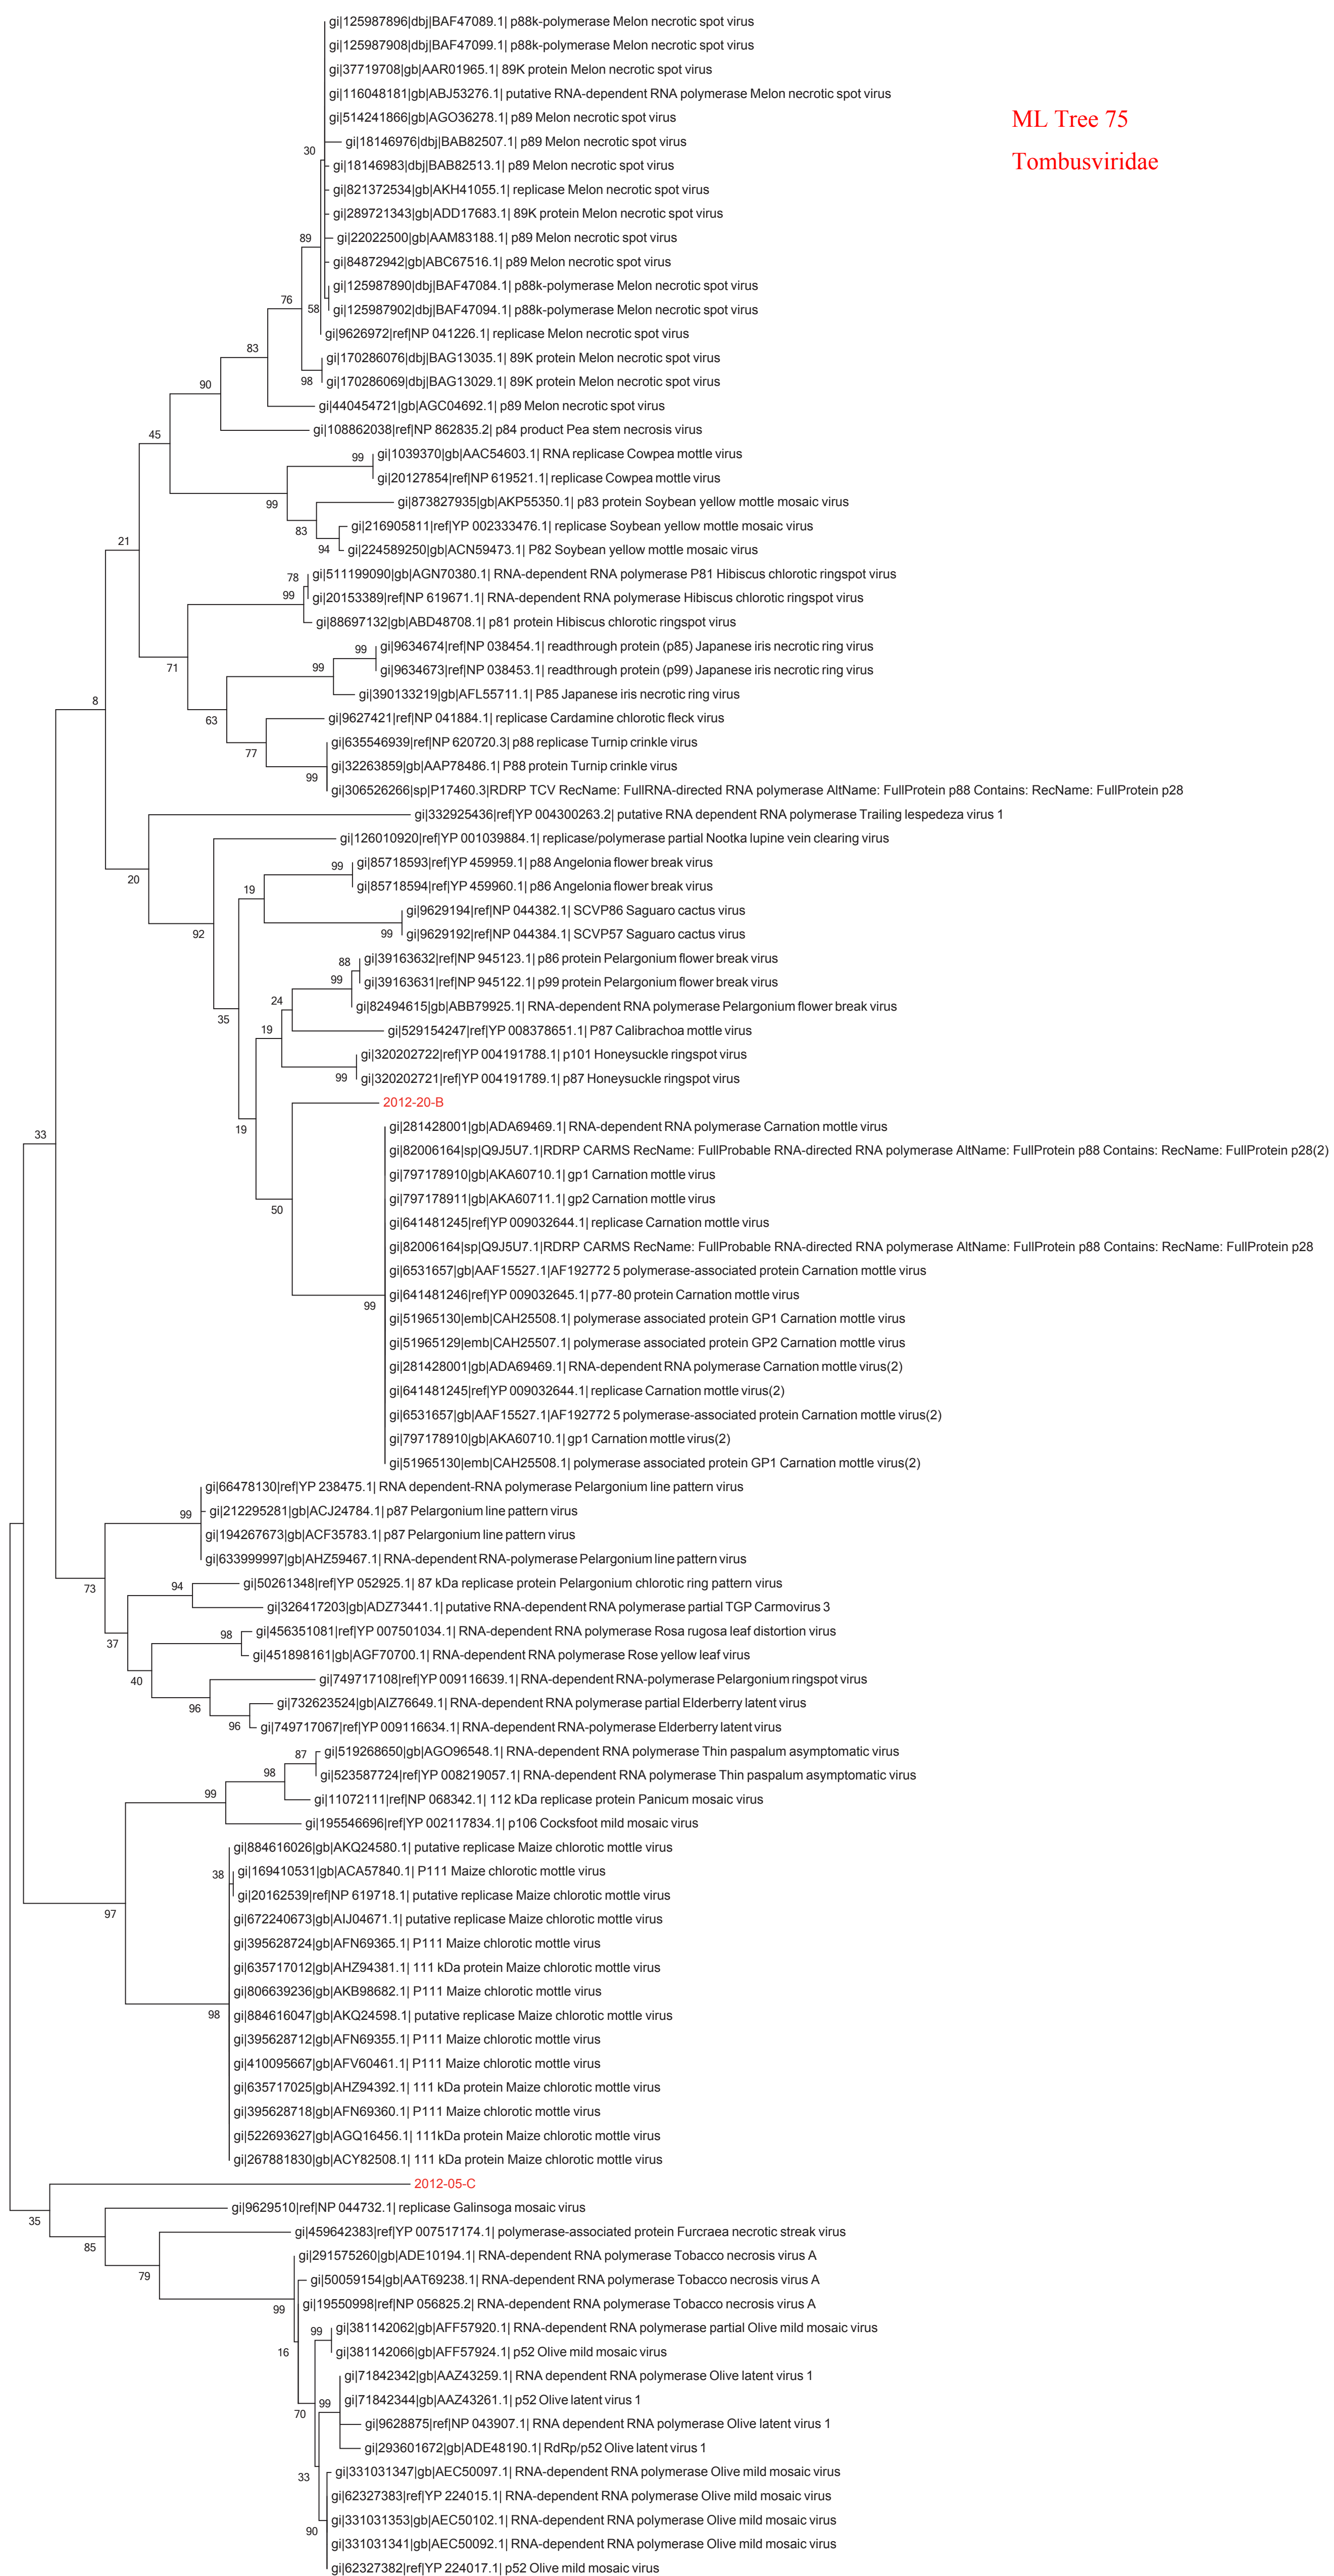

0.1

# ML Tree 76

## Tombusviridae

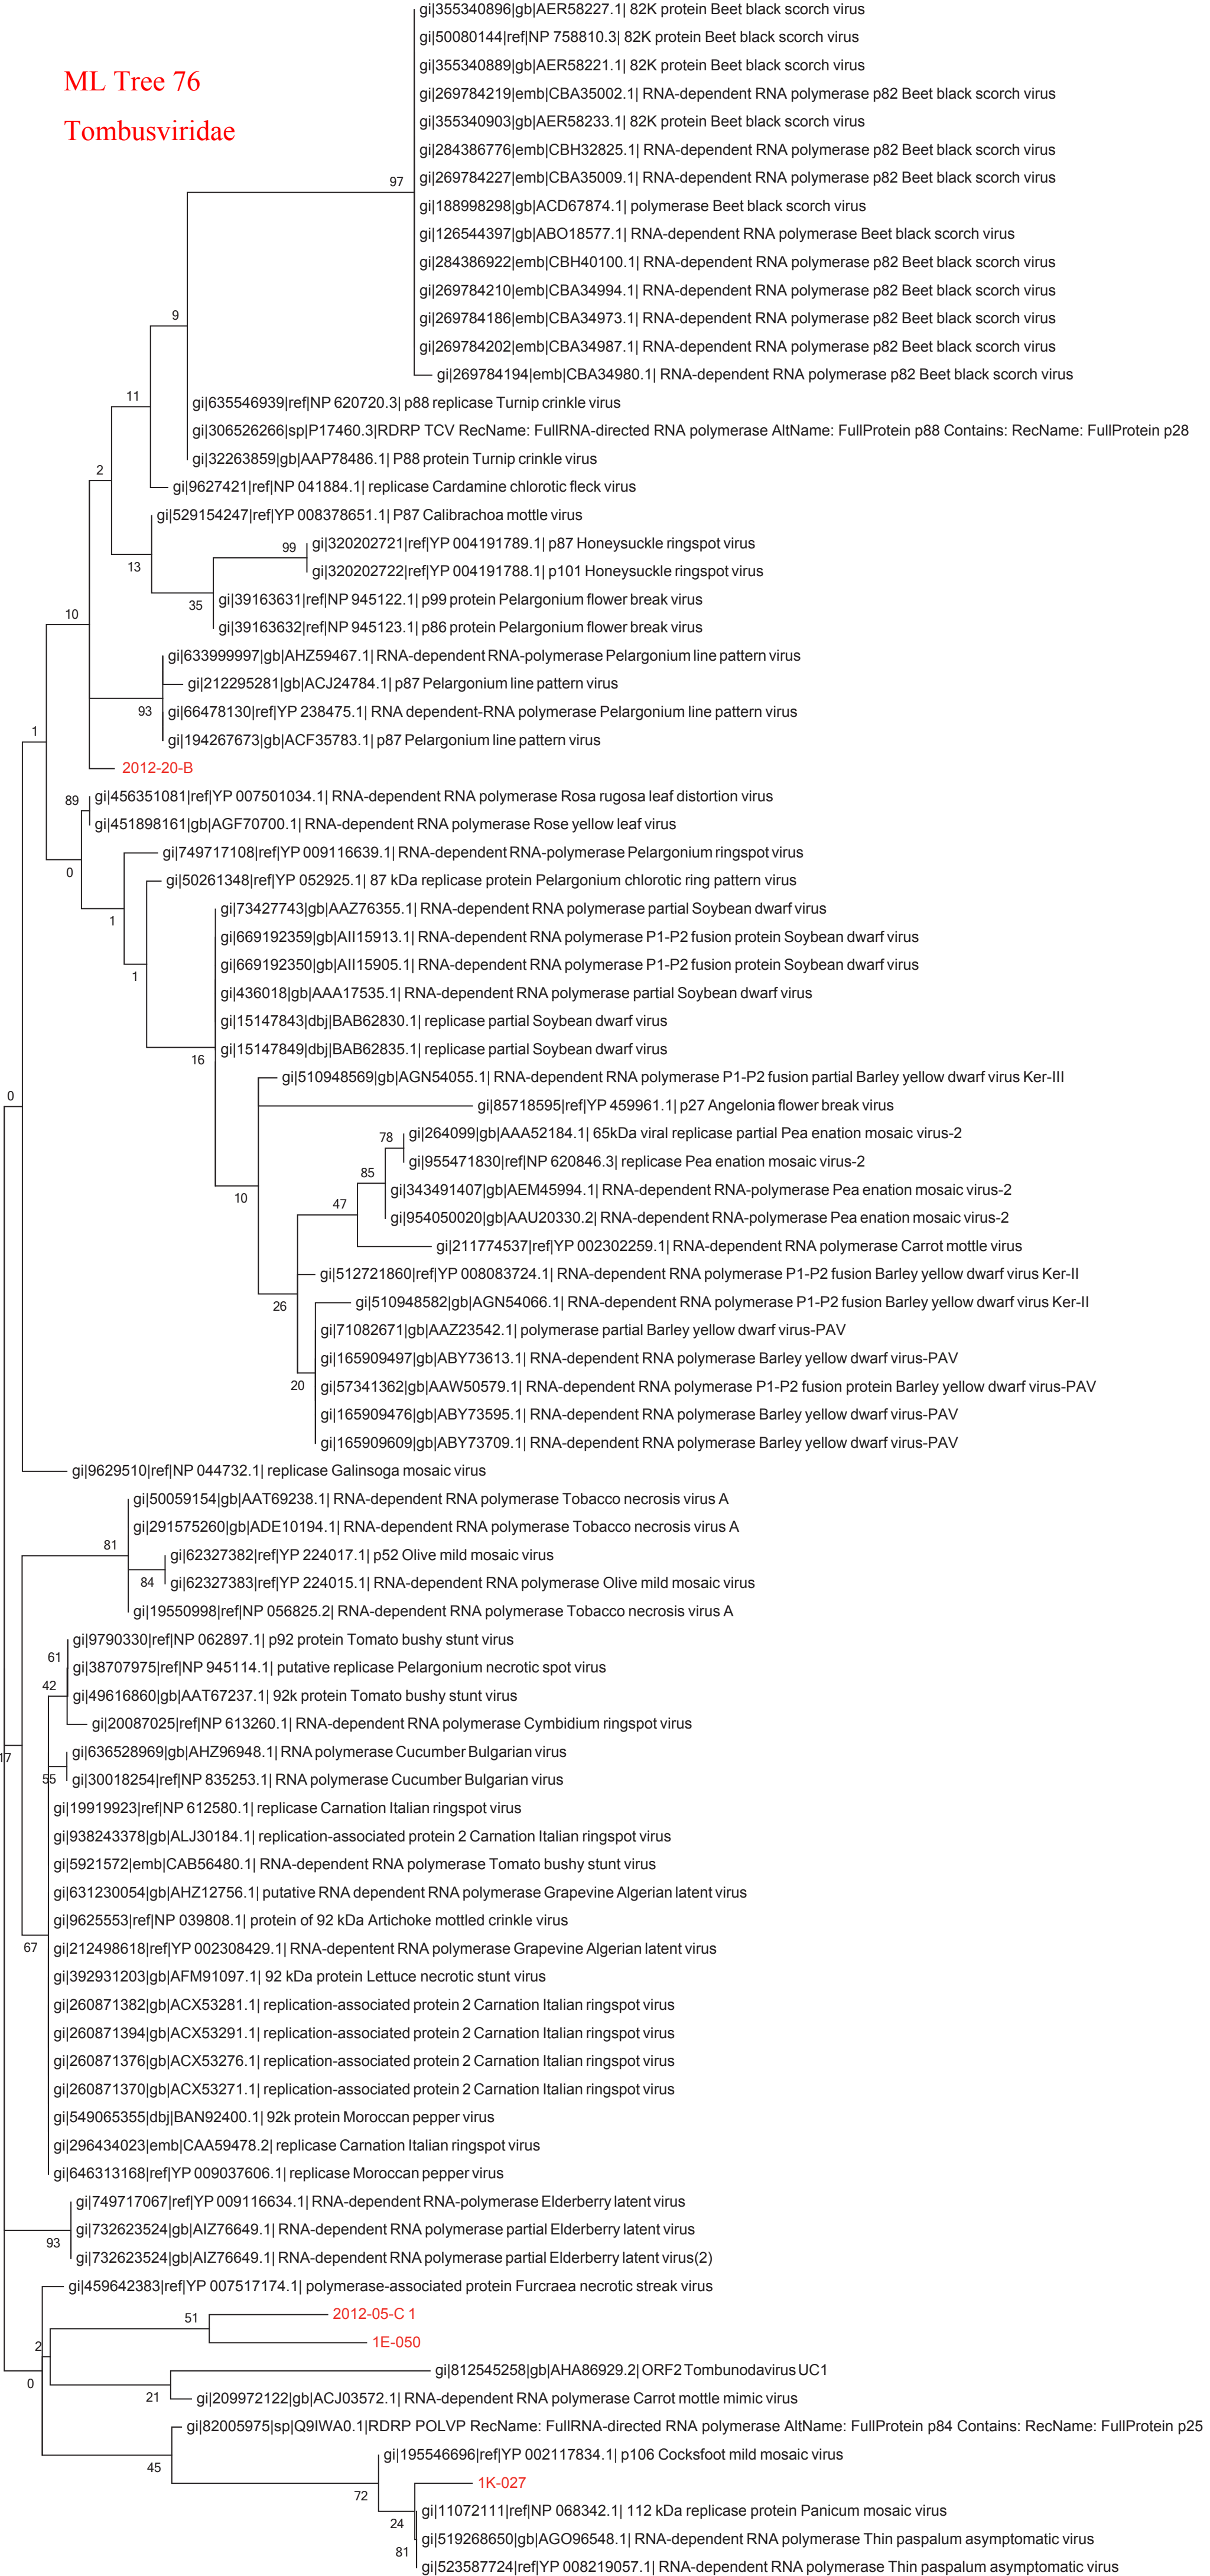

0.2



ML Tree 77  
Tombusviridae

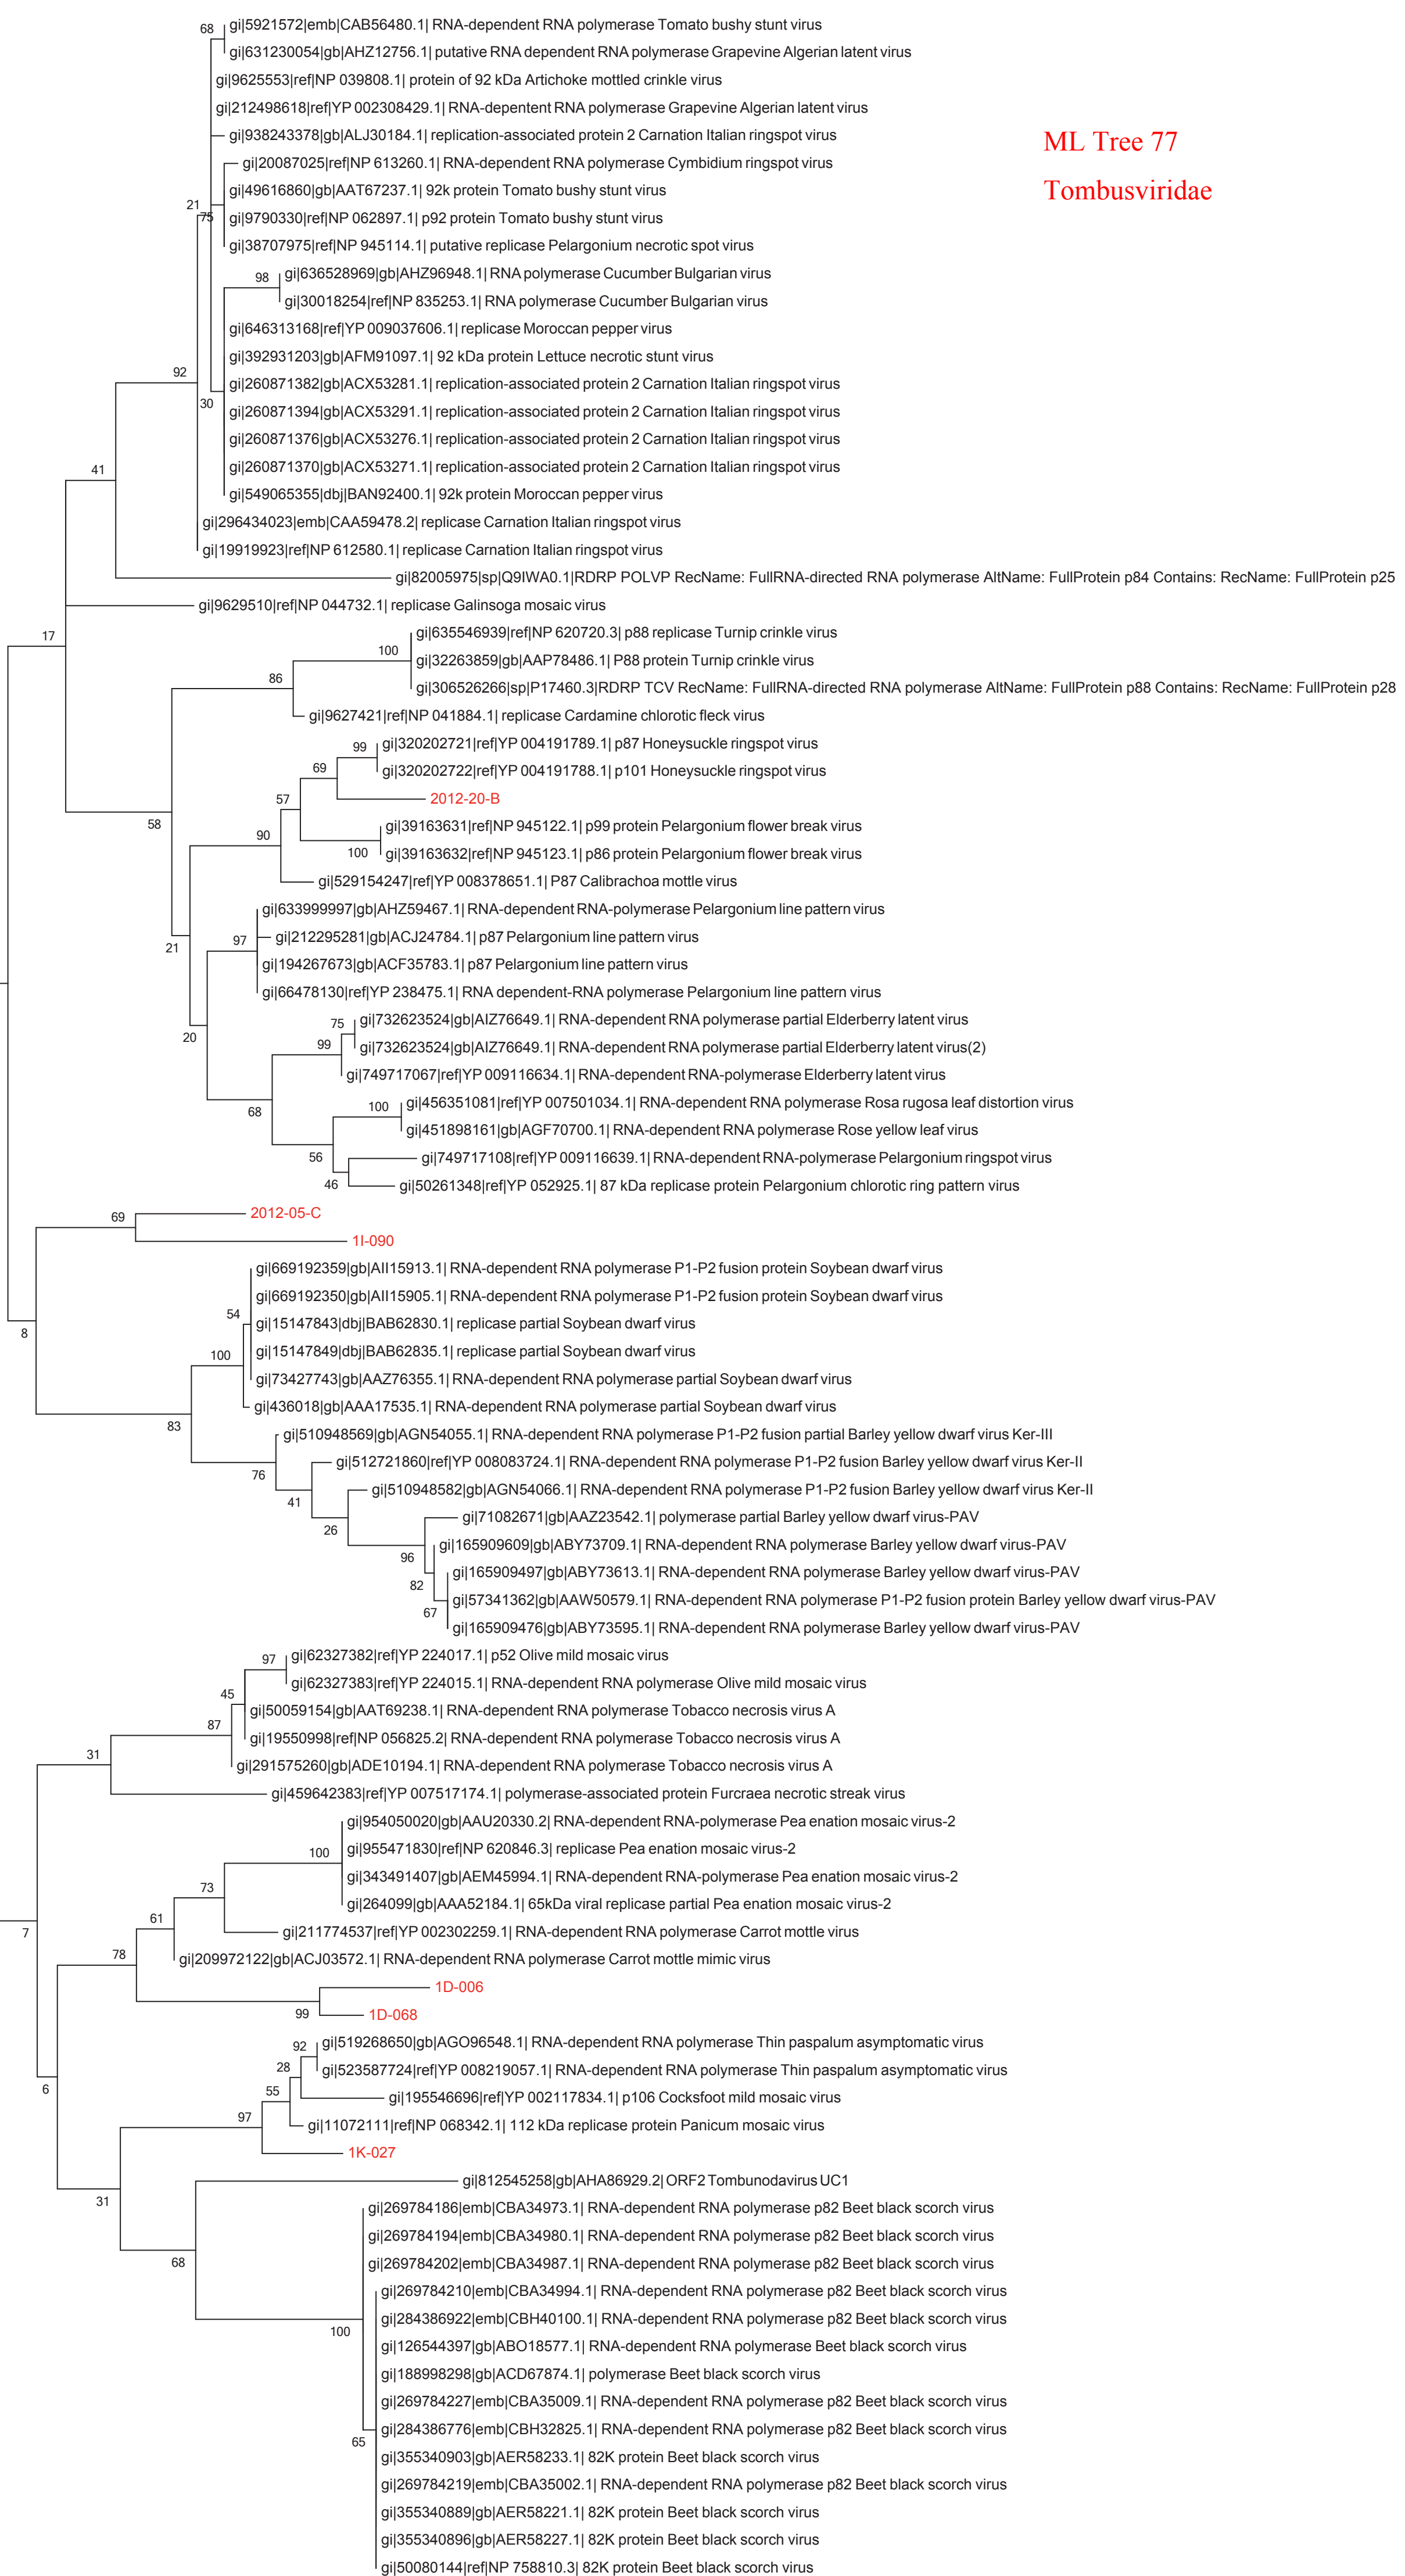

0.1



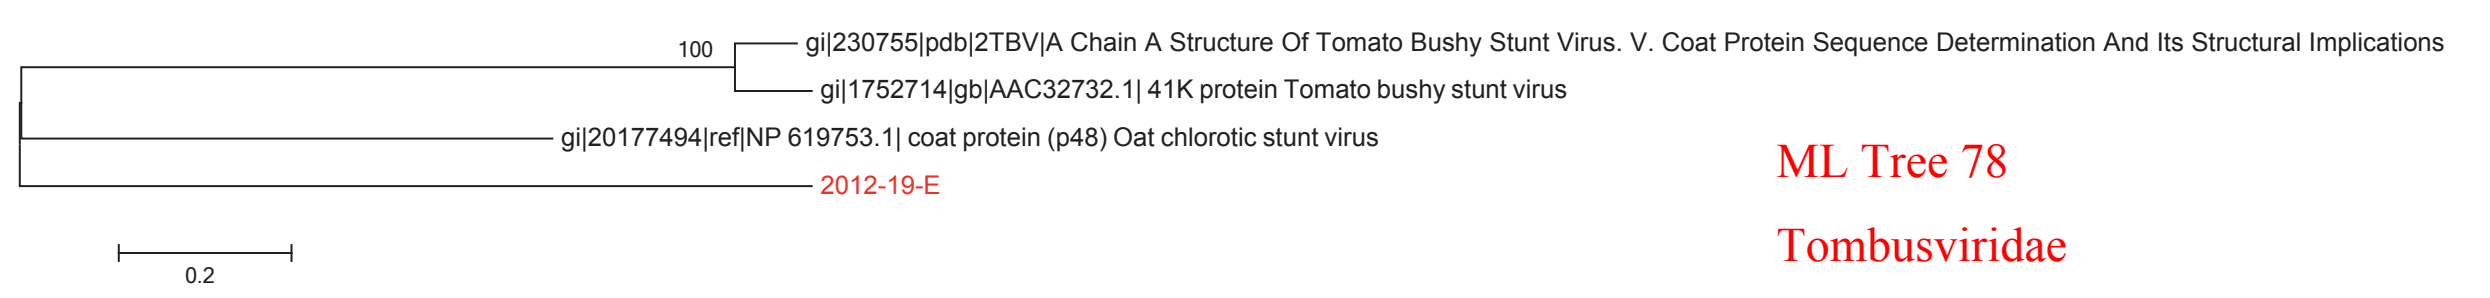

**ML Tree 79**

**Tombusviridae**

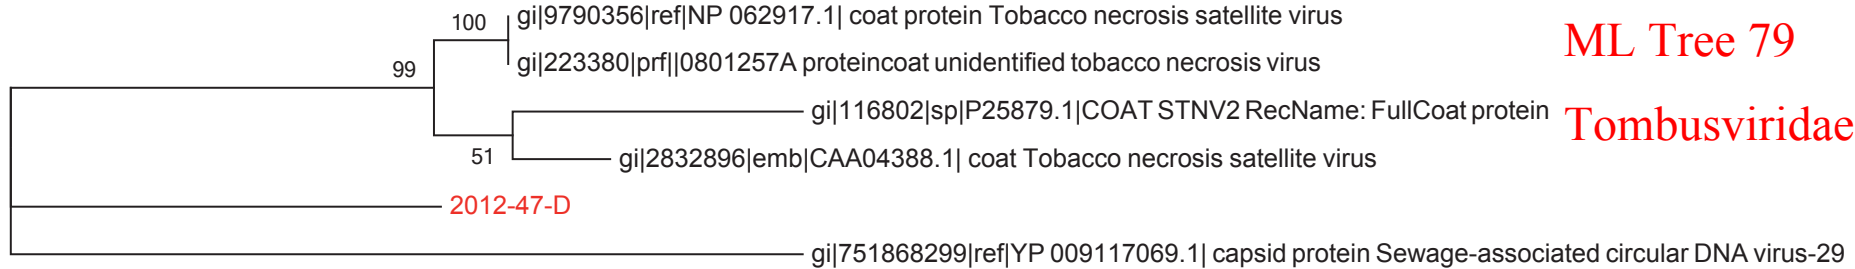

0.2

ML Tree 80

Tymoviridae

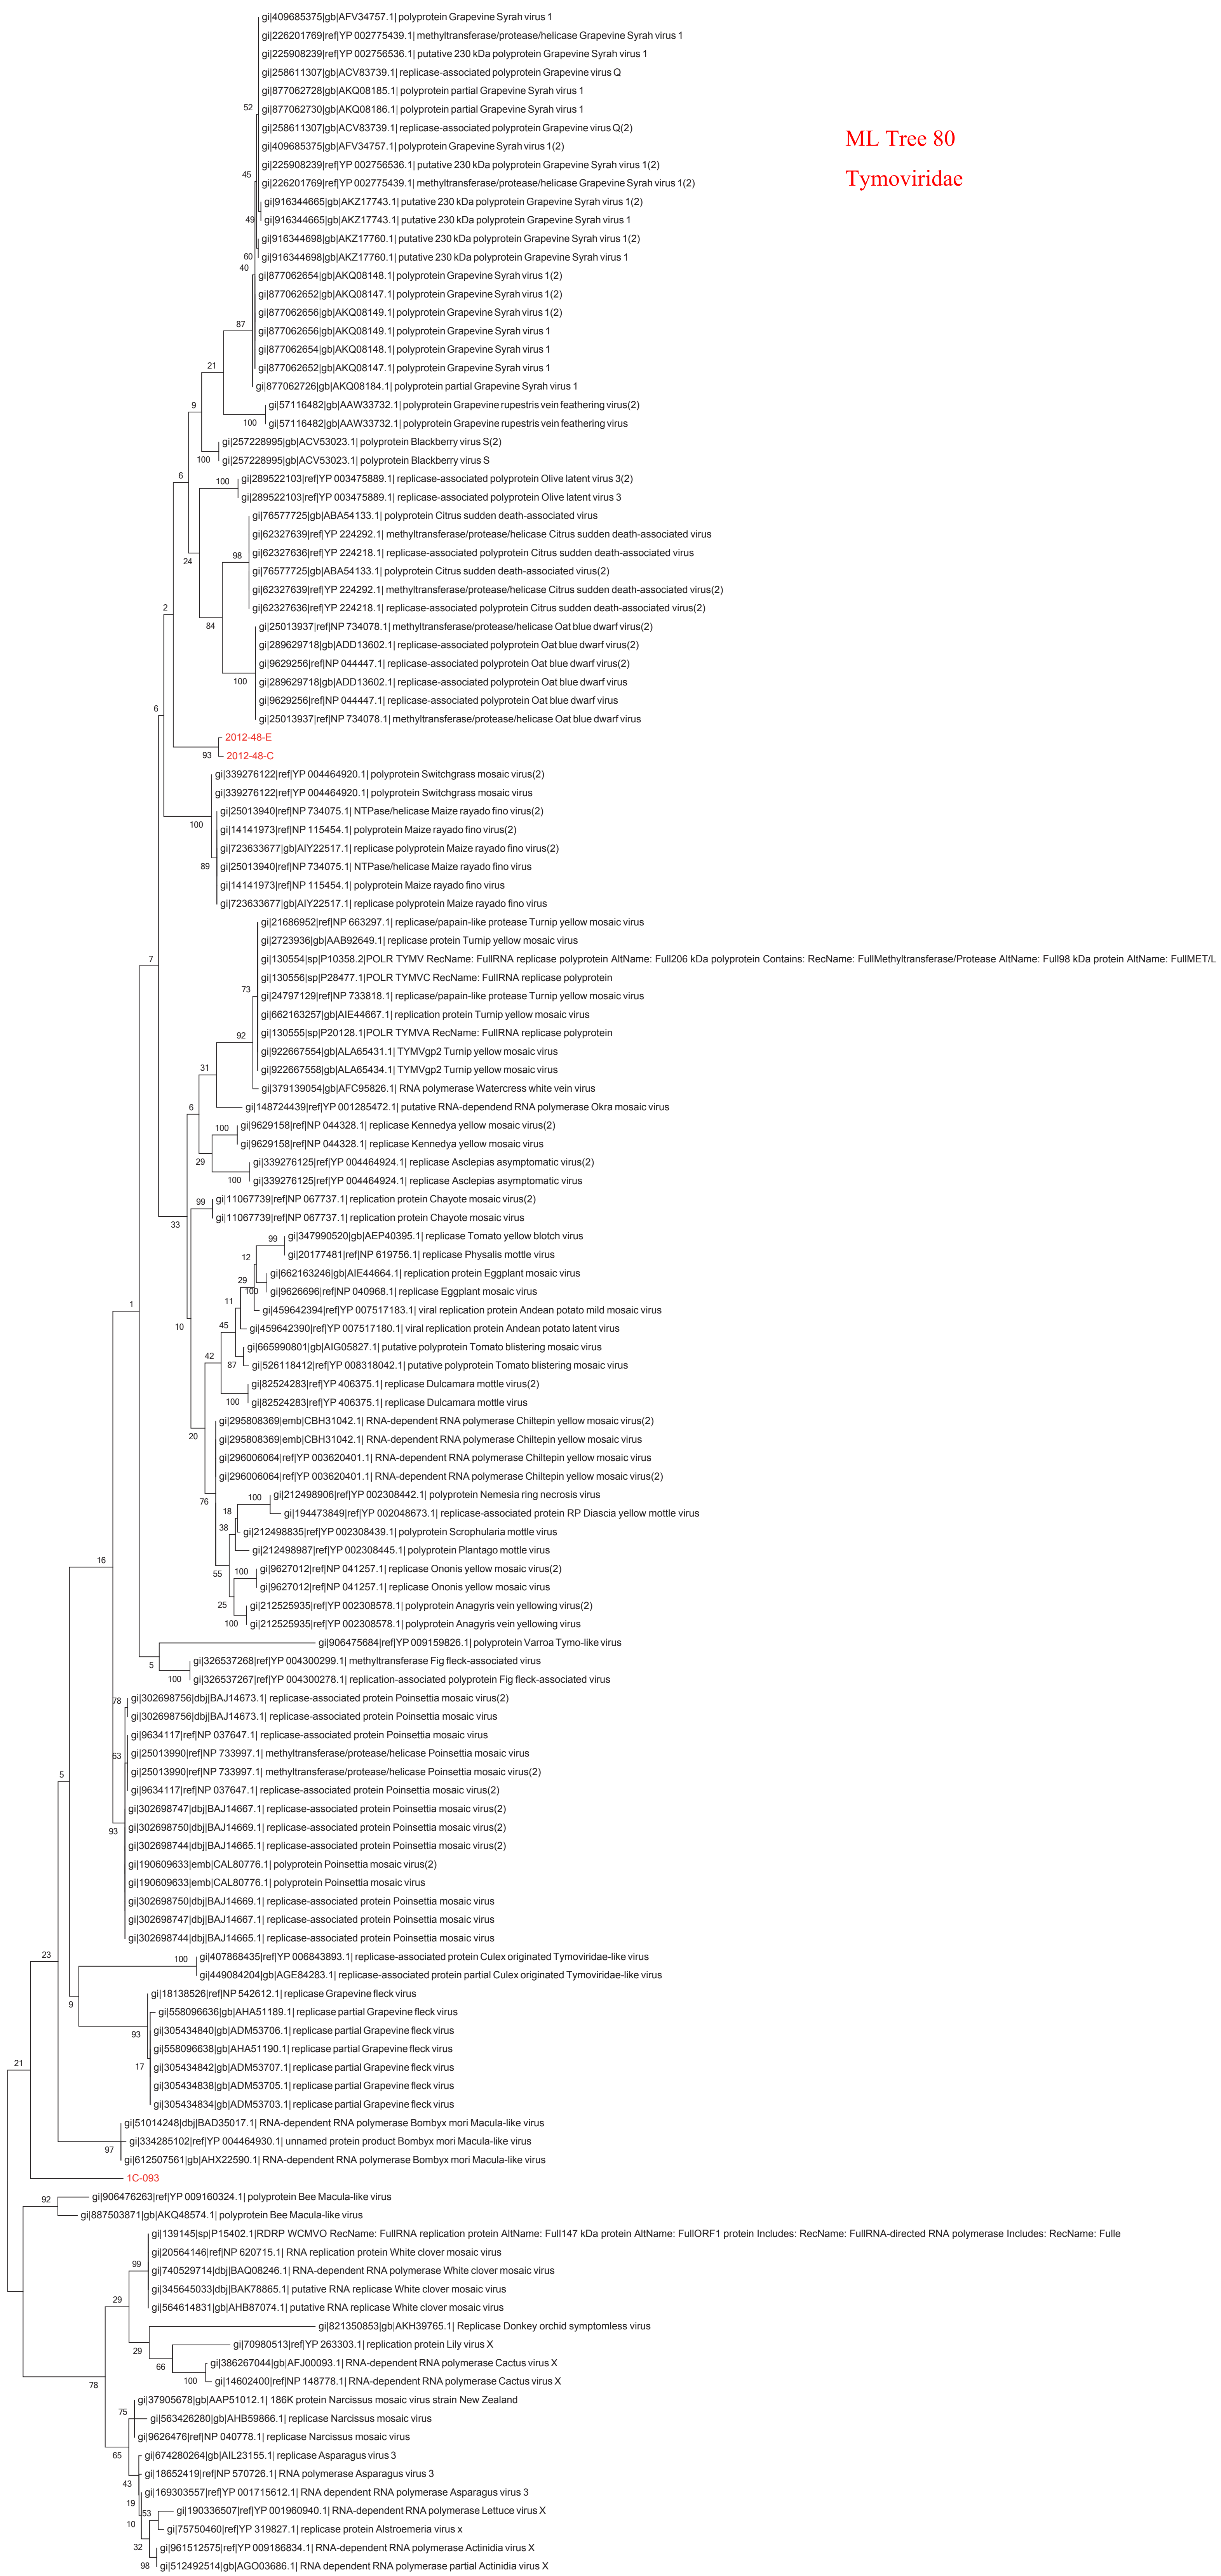

0.5



# ML Tree 81

## Tymoviridae

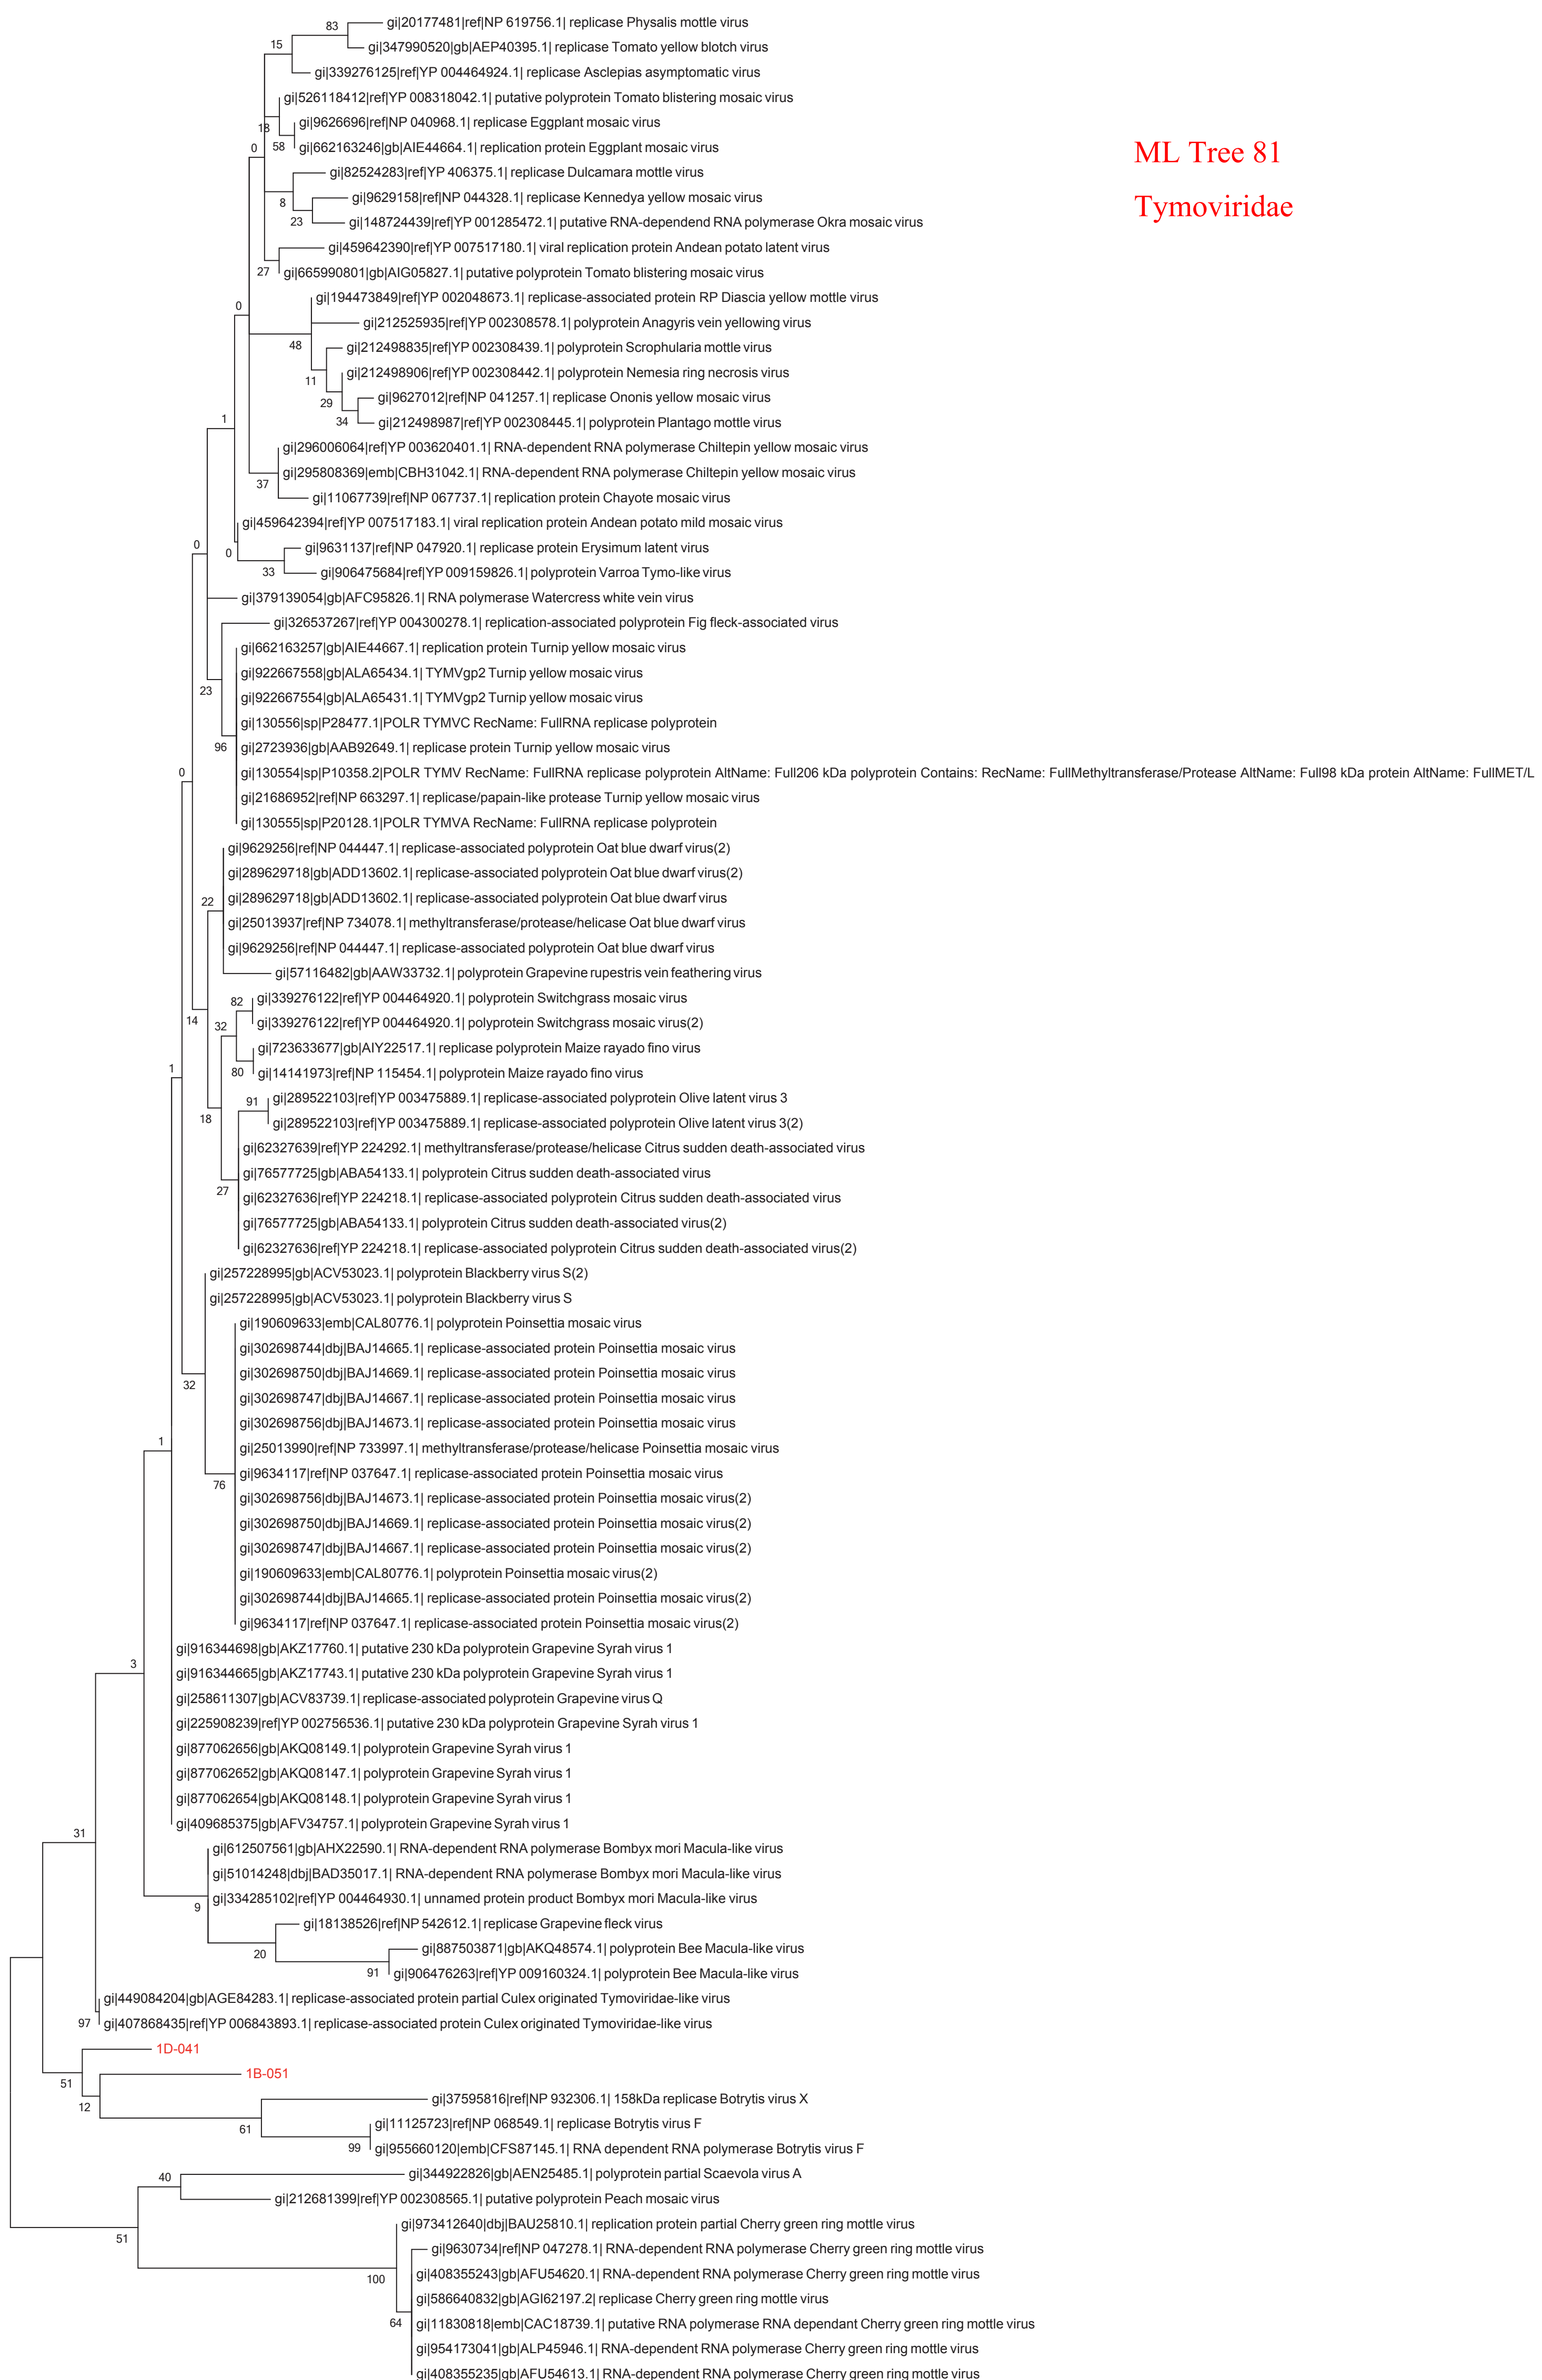

0.2

# ML Tree 82

## Tymoviridae

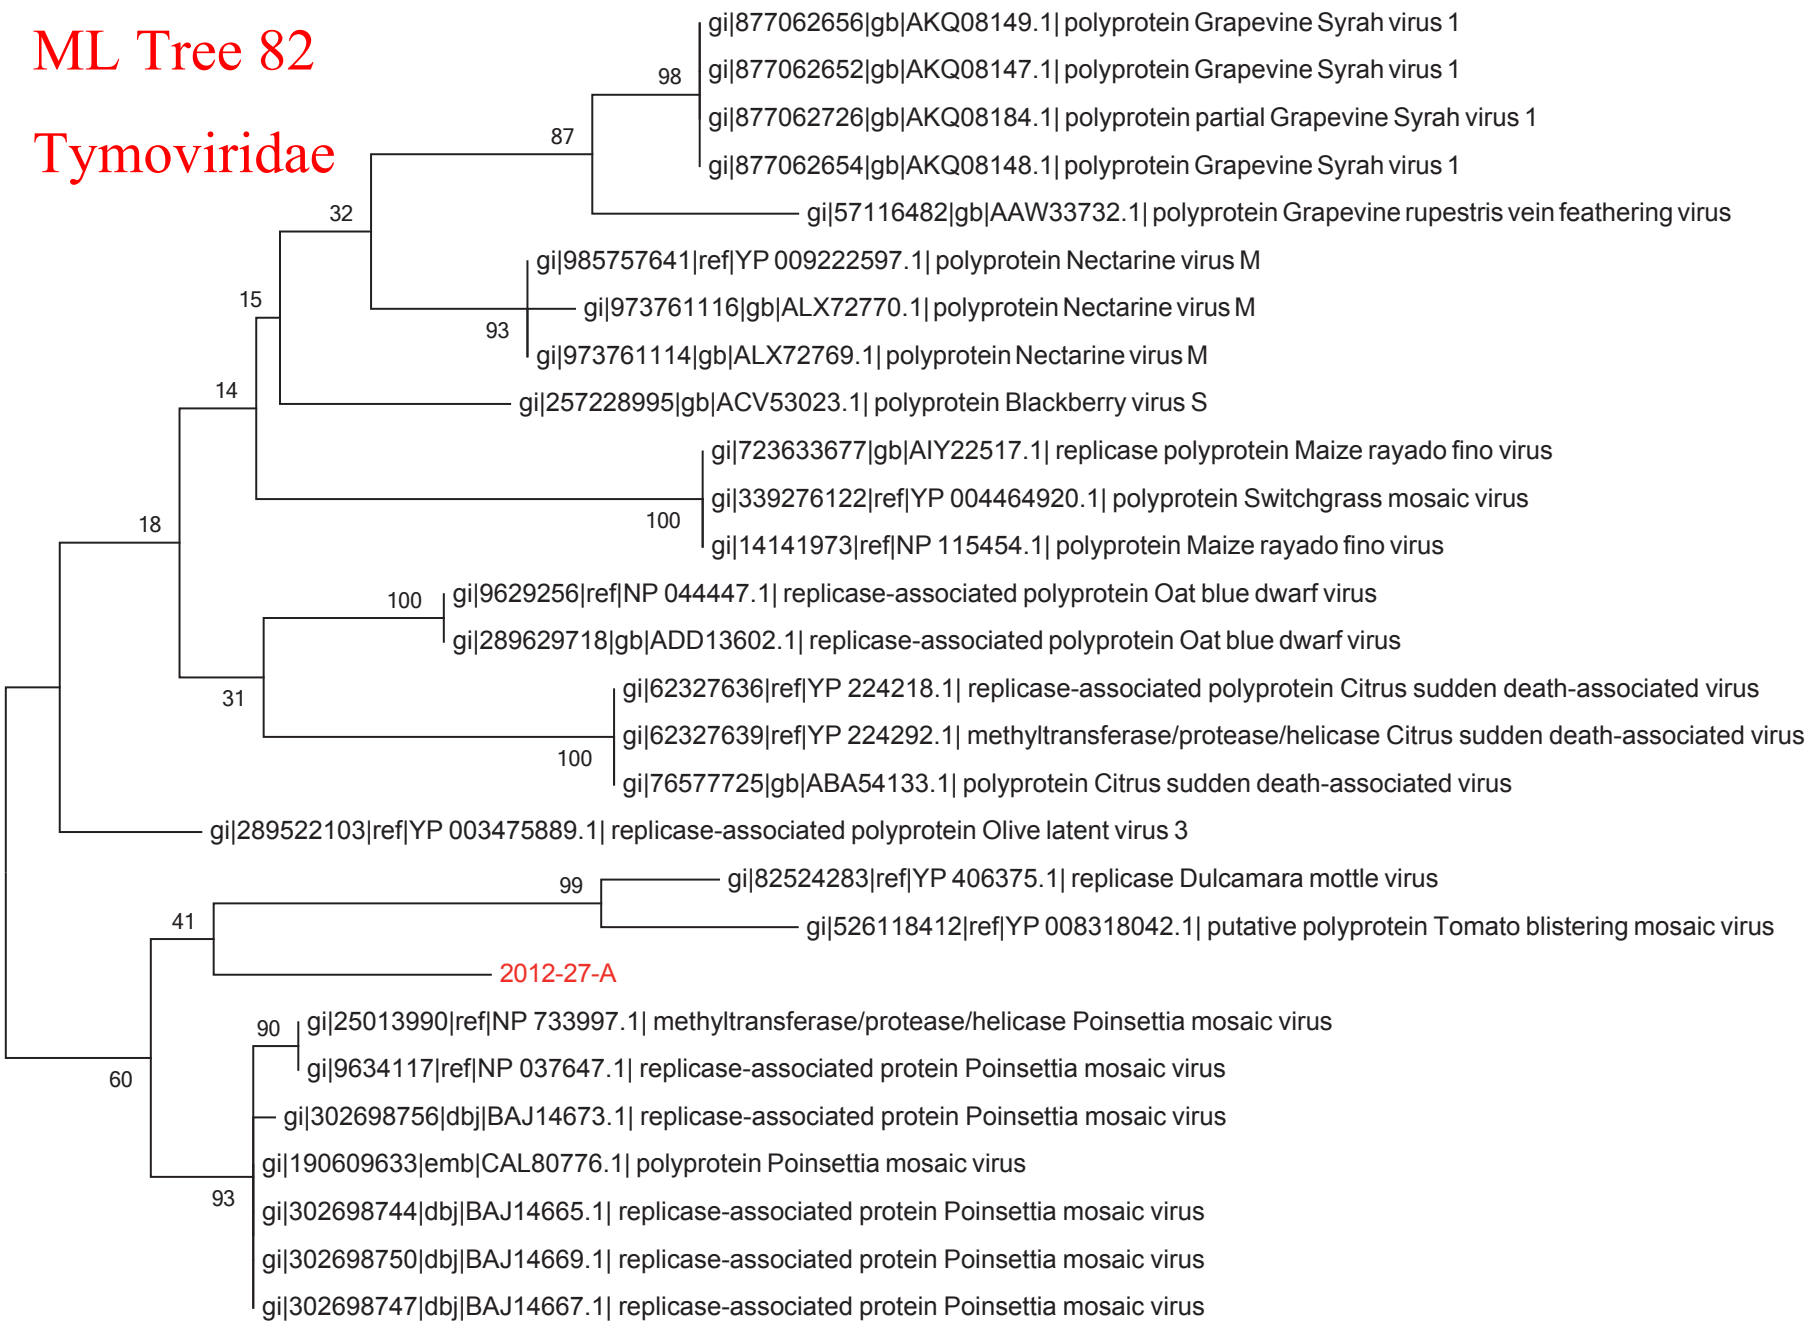

0.1



ML Tree 83

Tymoviridae

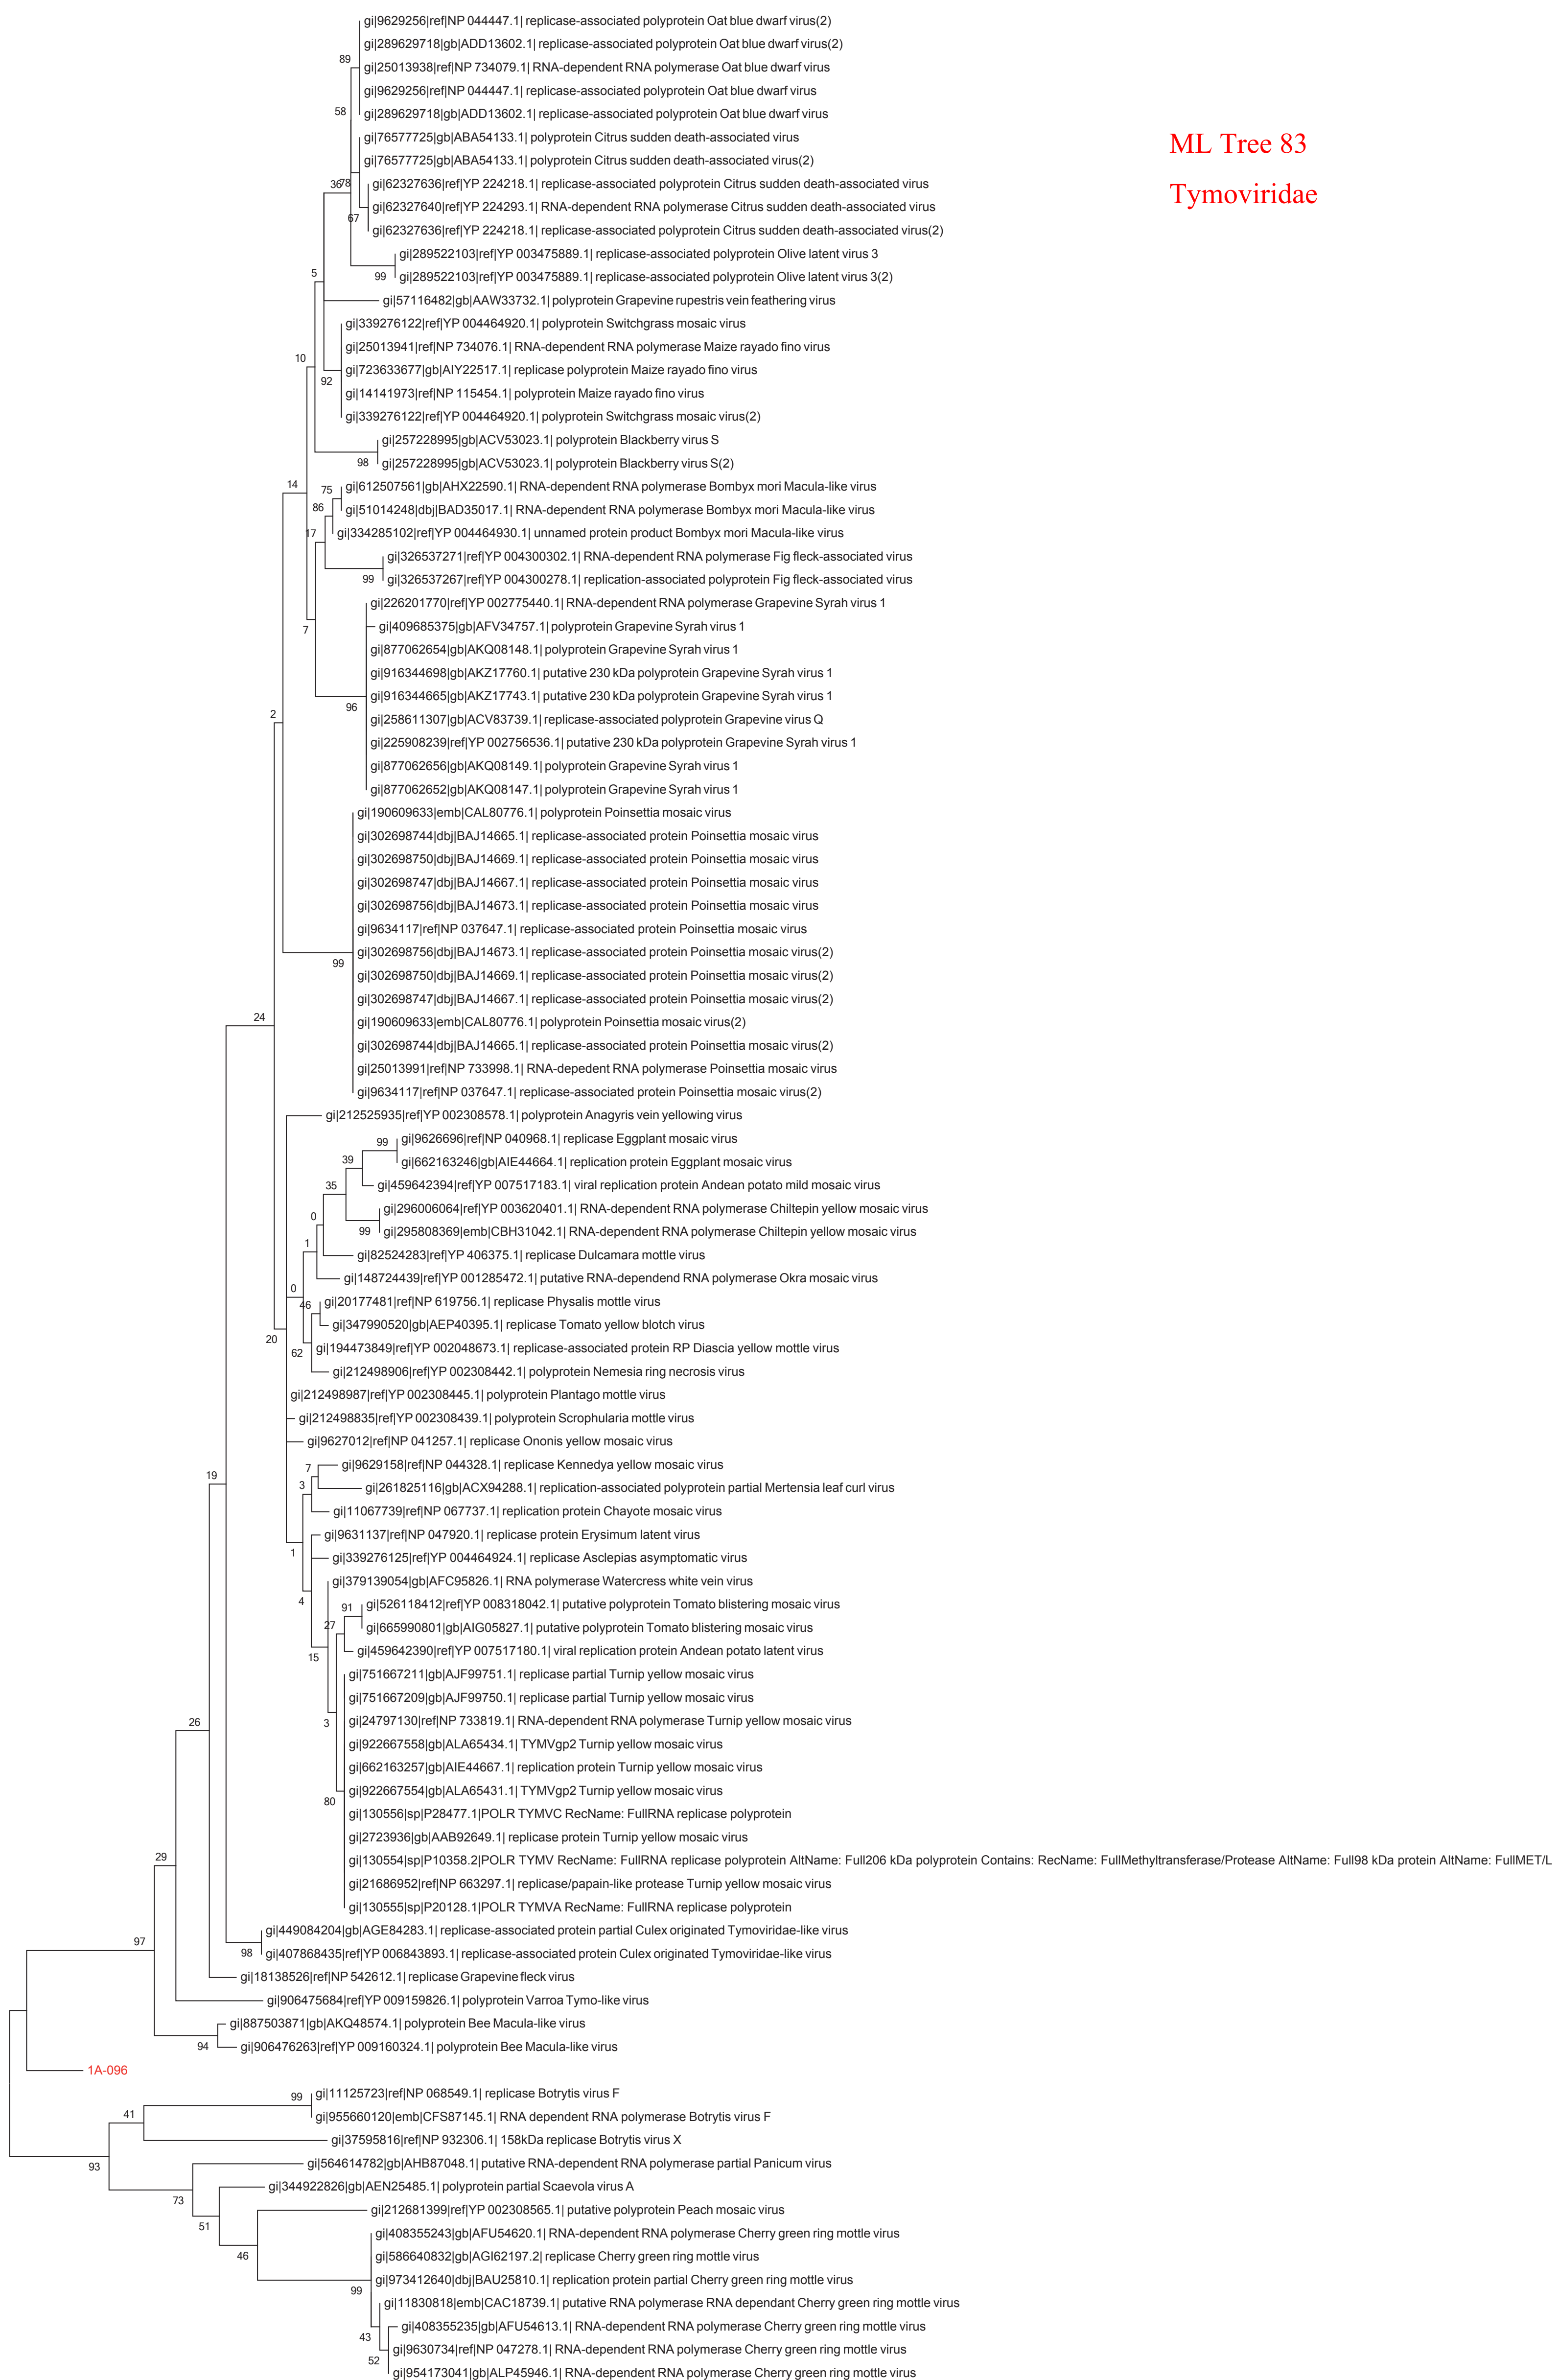

0.2



# ML Tree 84

## Unclassified RNA virus

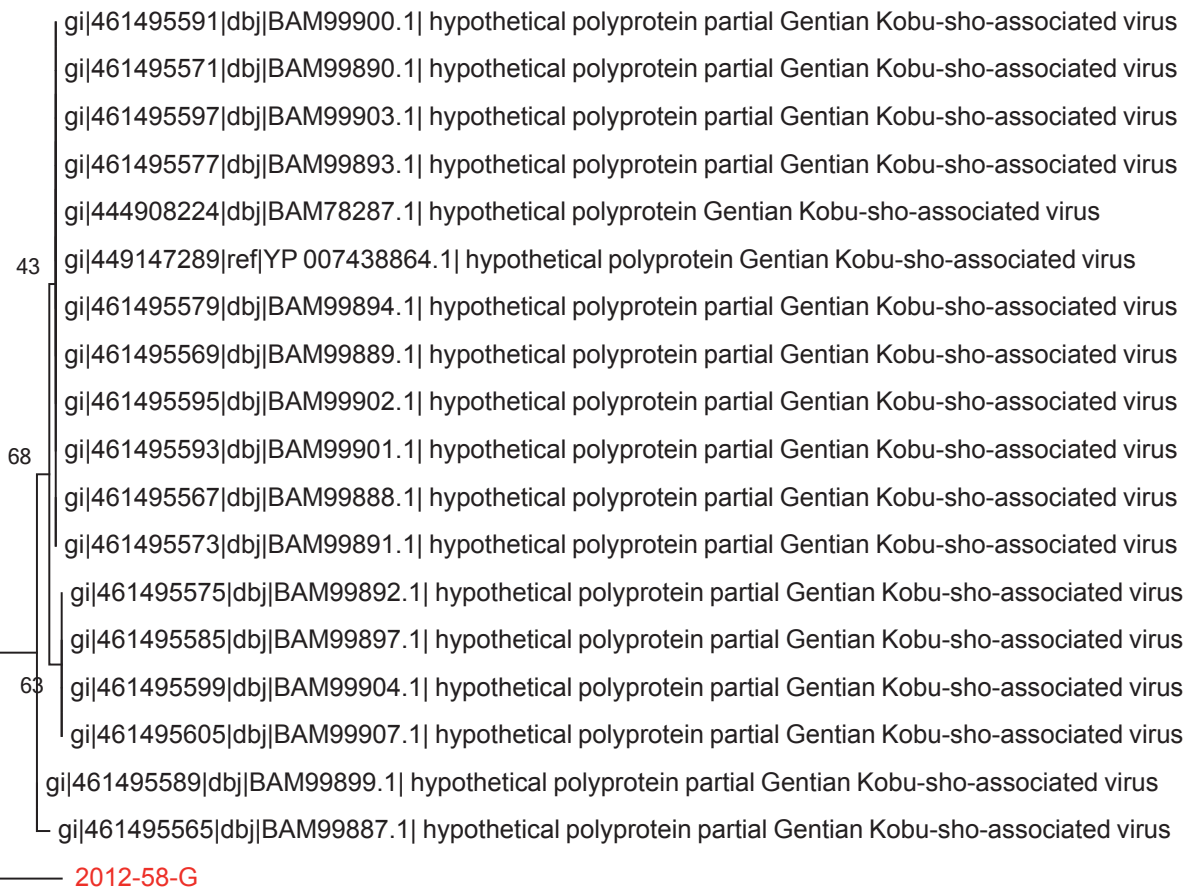

0.1

ML Tree 85

Unclassified RNA virus

gi|353332644|ref|YP\_004901701.1| polymerase Blueberry necrotic ring blotch virus

gi|472825220|gb|AGI44298.1| RNA dependent RNA polymerase Blueberry necrotic ring blotch virus

1F-051

0.2

ML Tree 86  
Virgaviridae

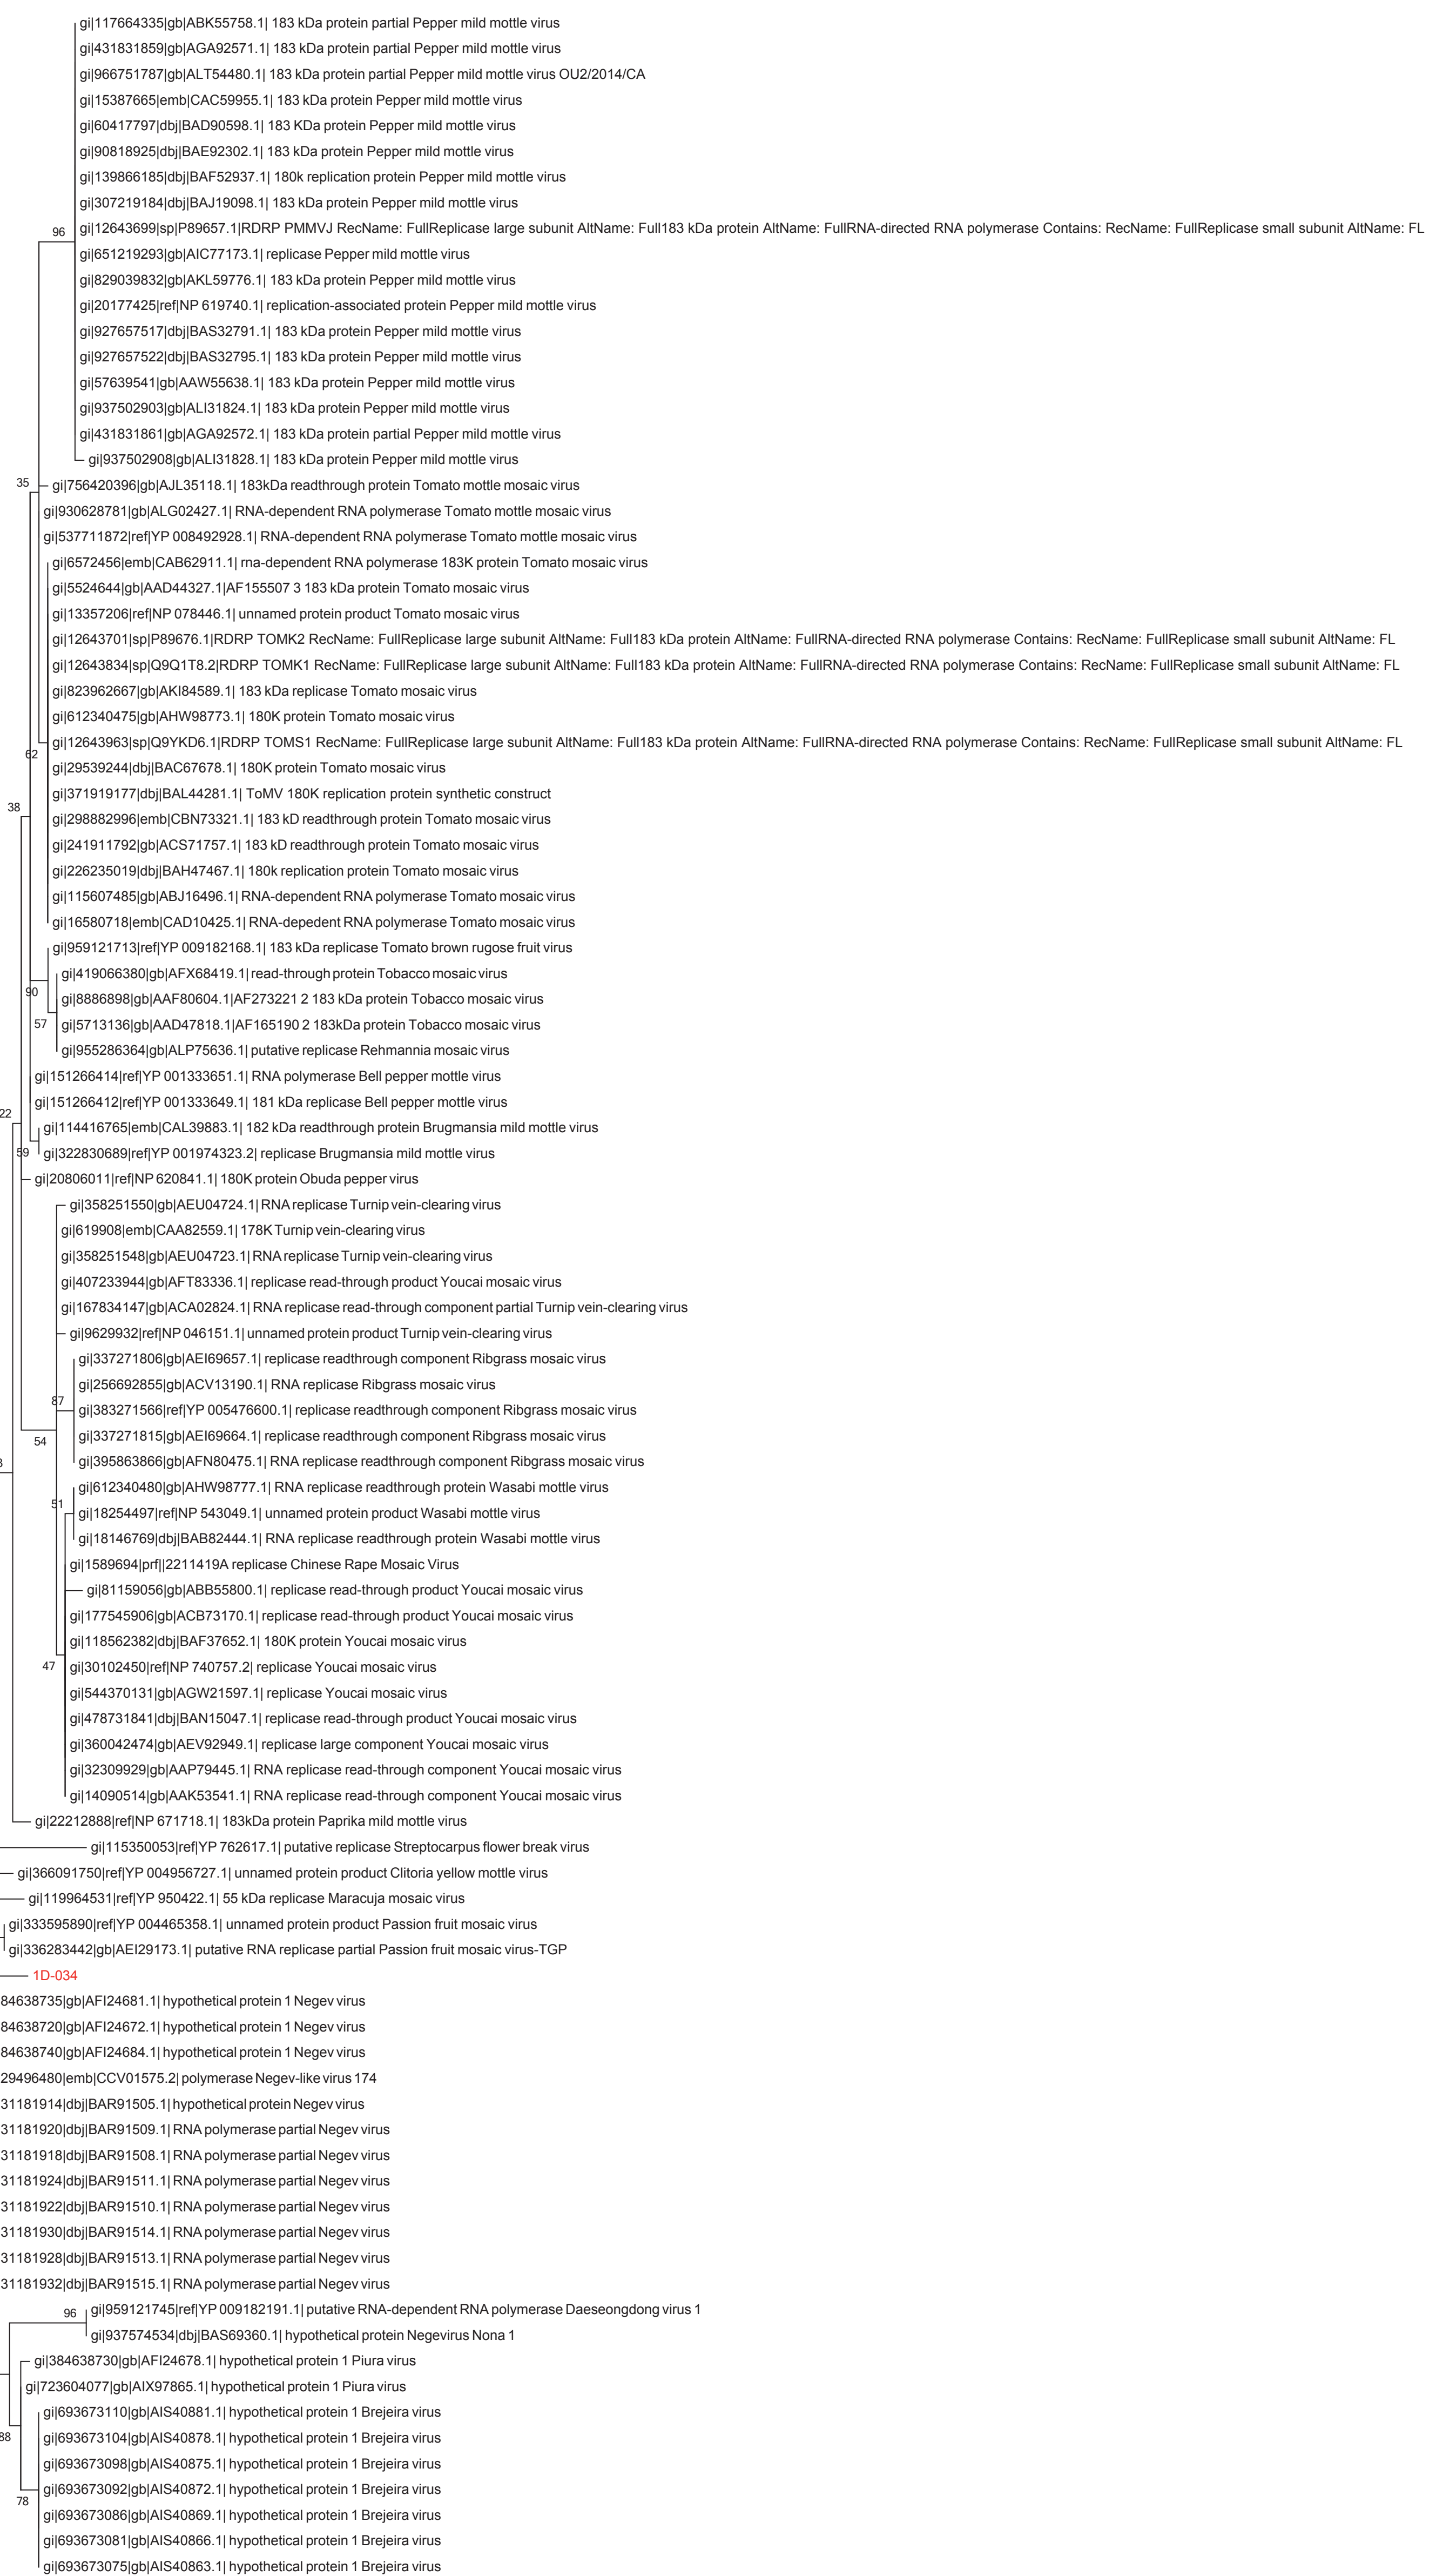



ML Tree 87  
Virgaviridae

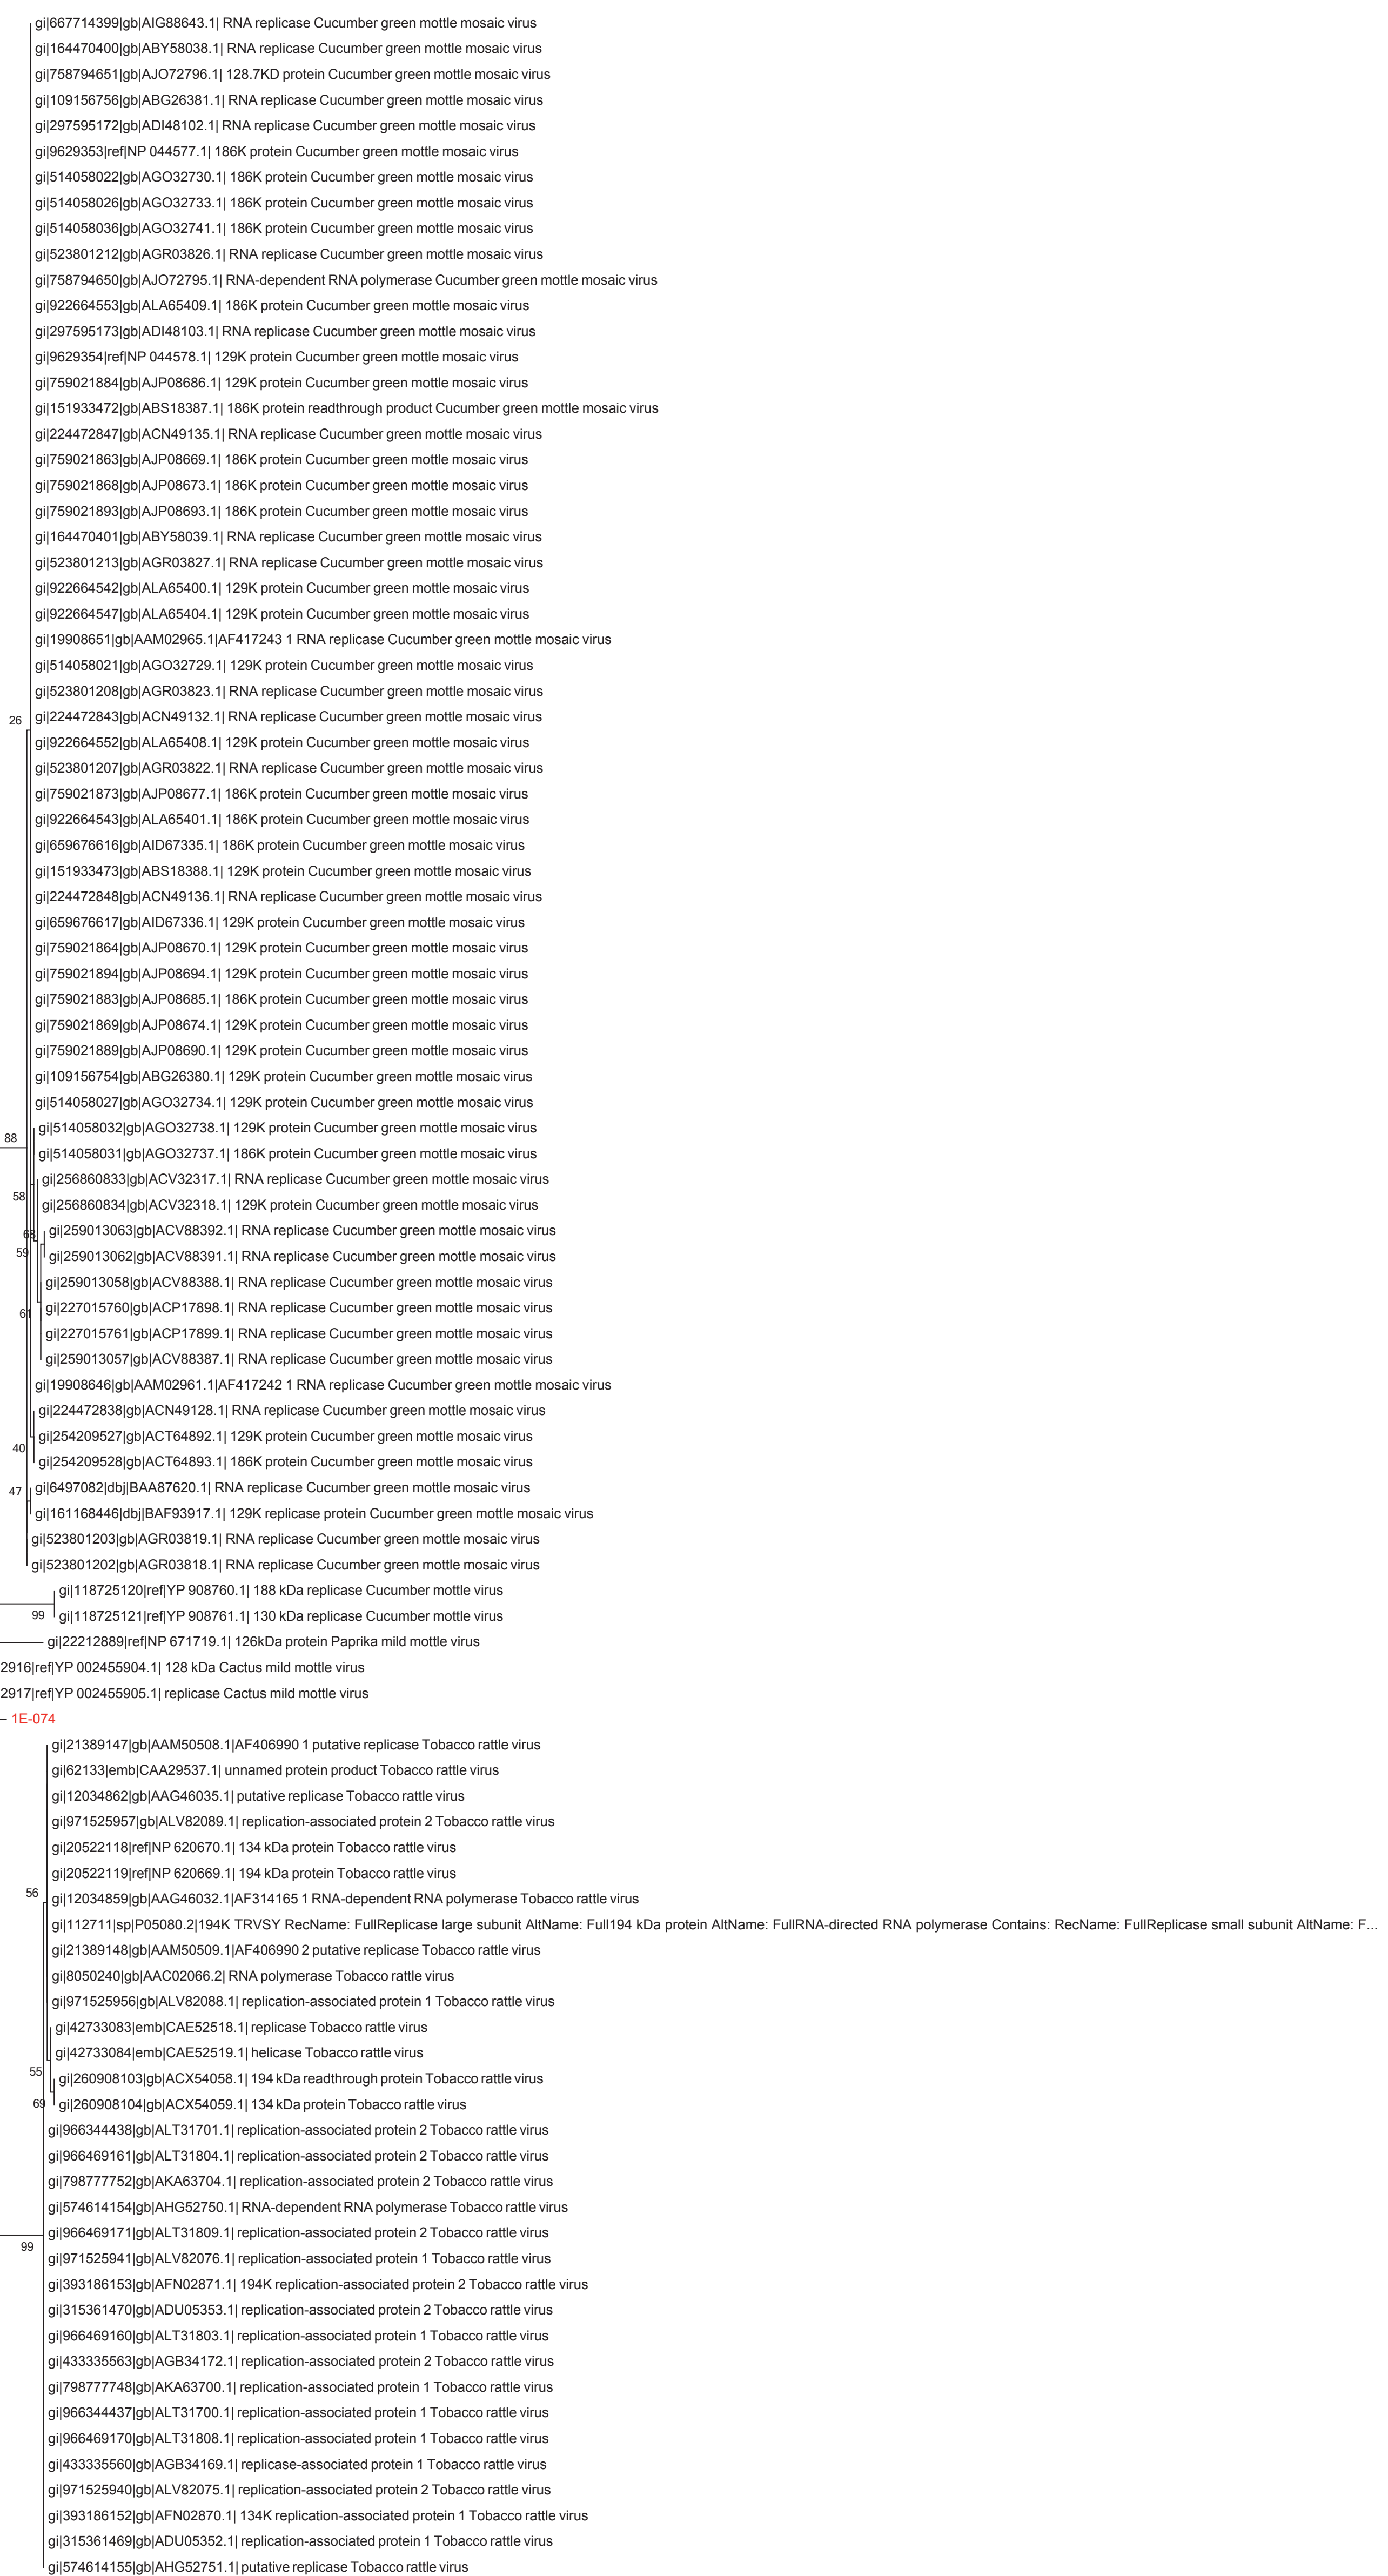



ML Tree 88

Virgaviridae

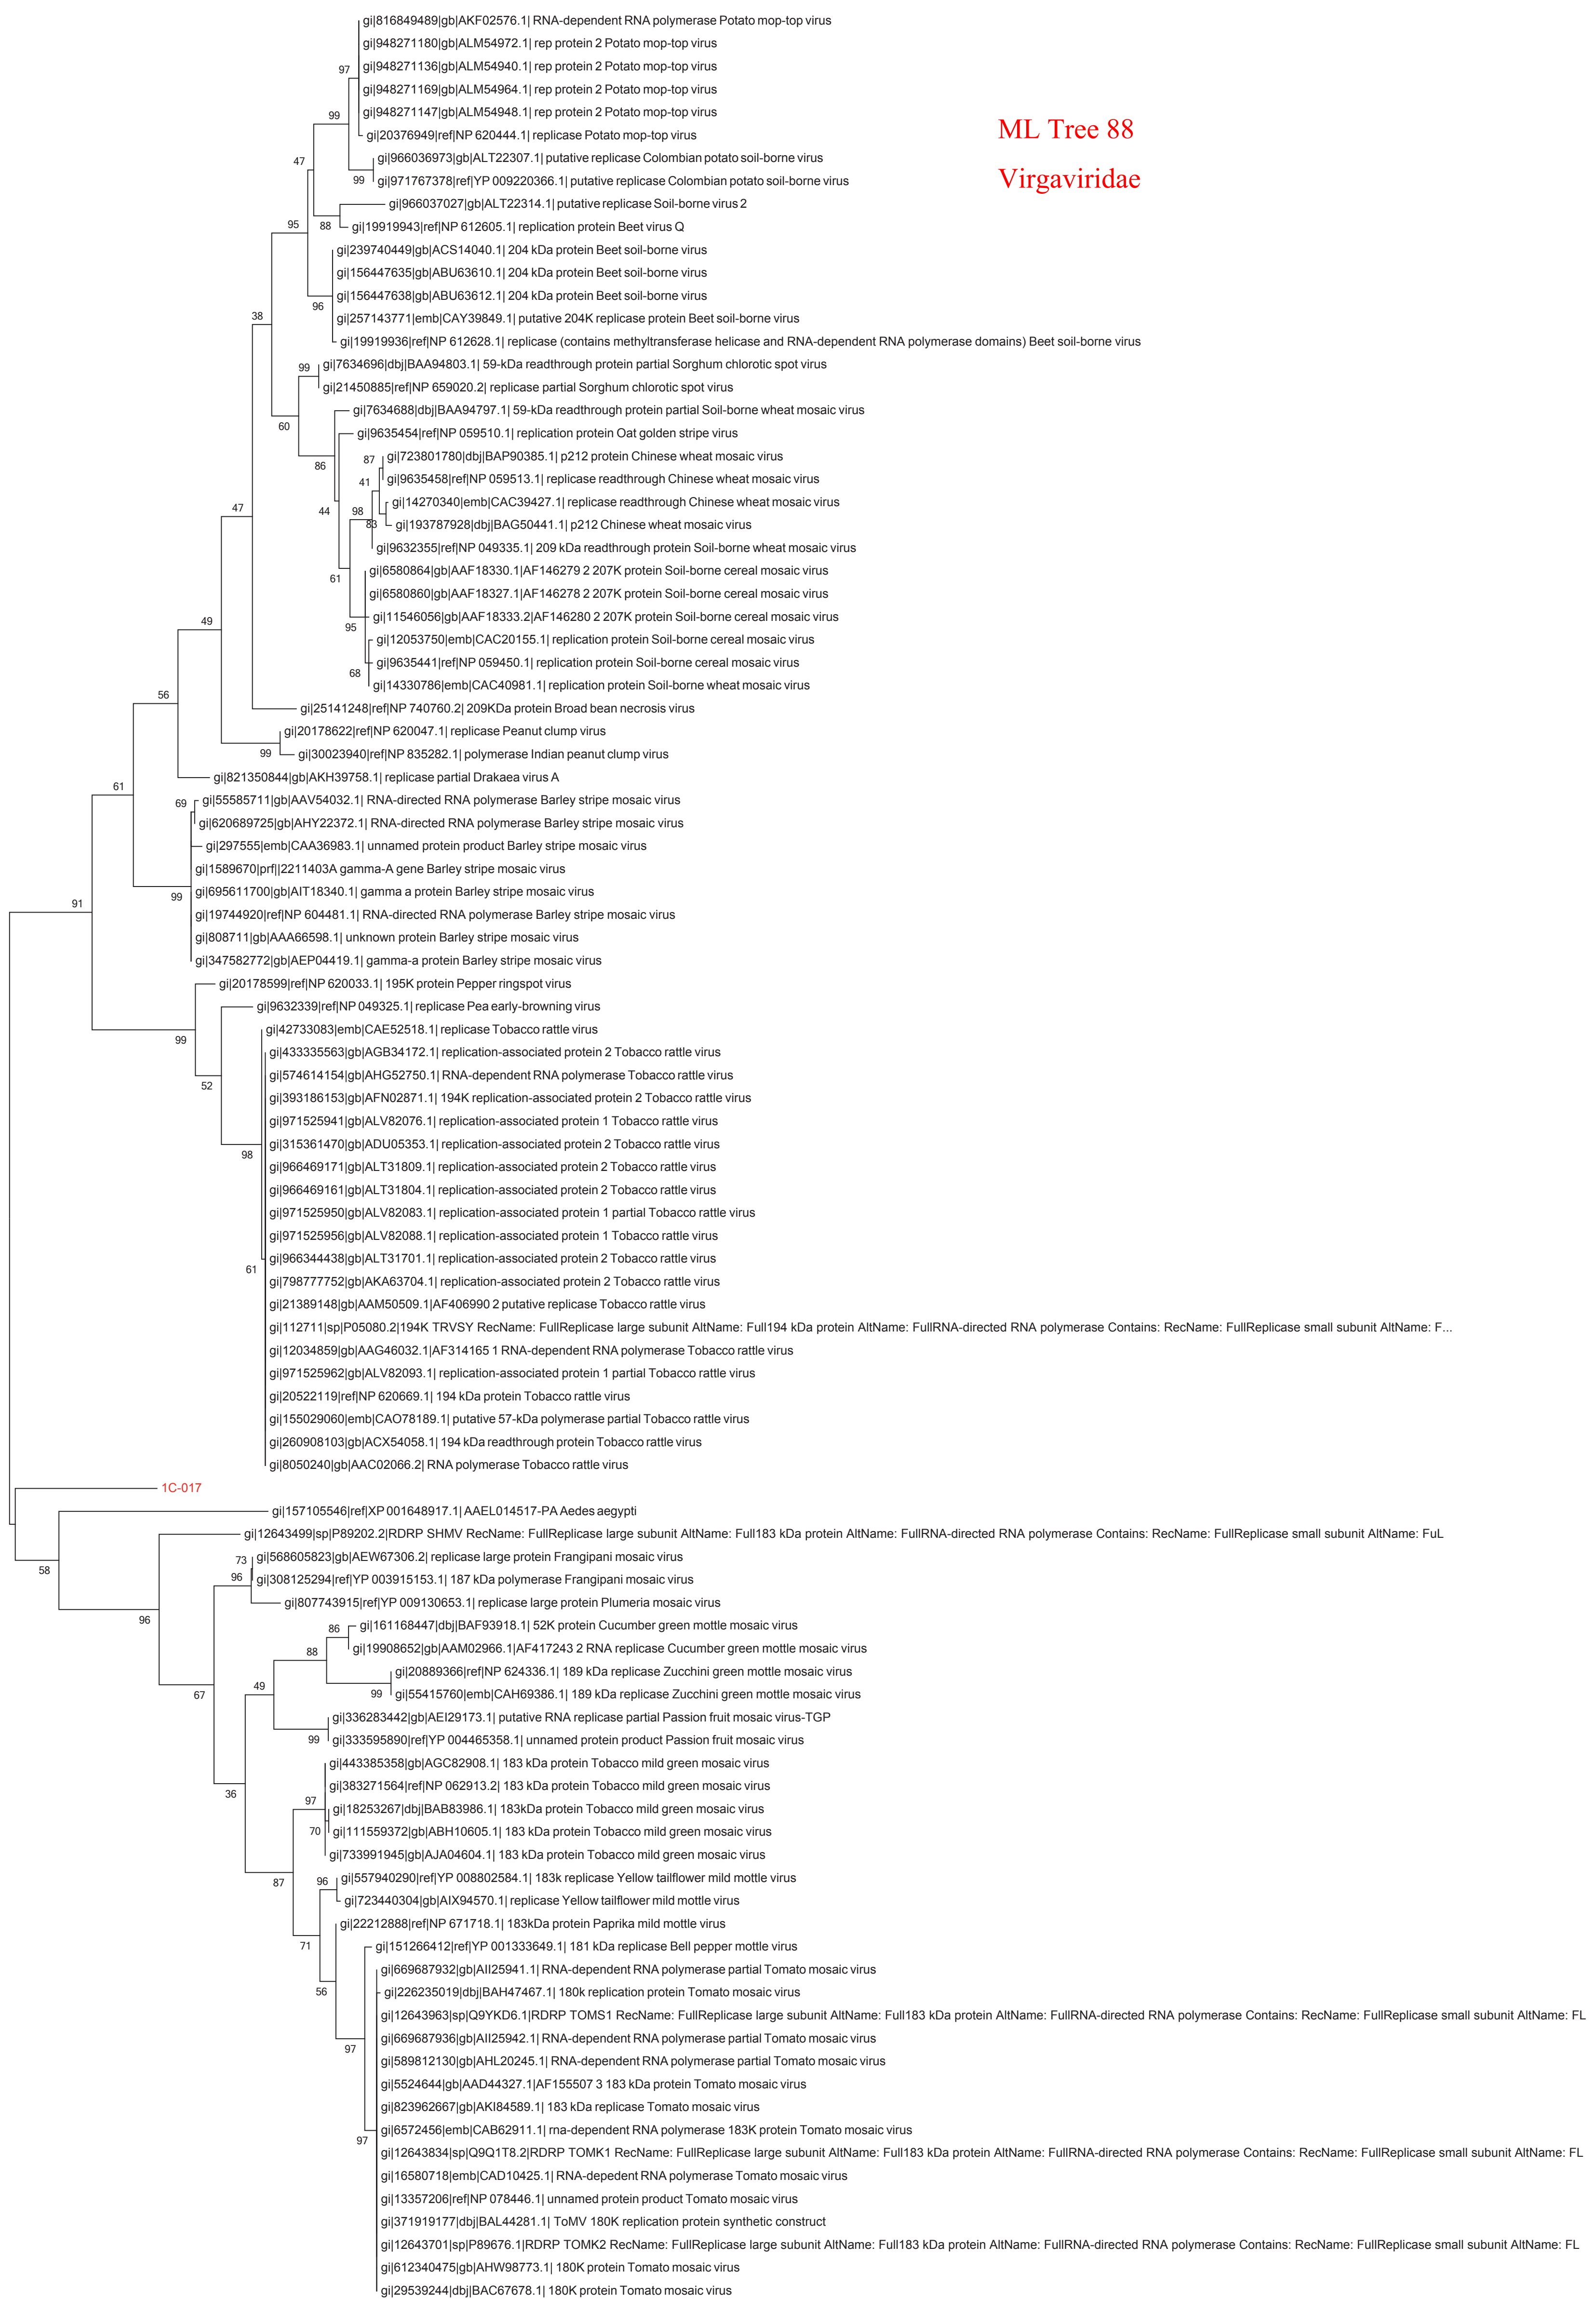

0.2

# ML Tree 89

## Potyviridae

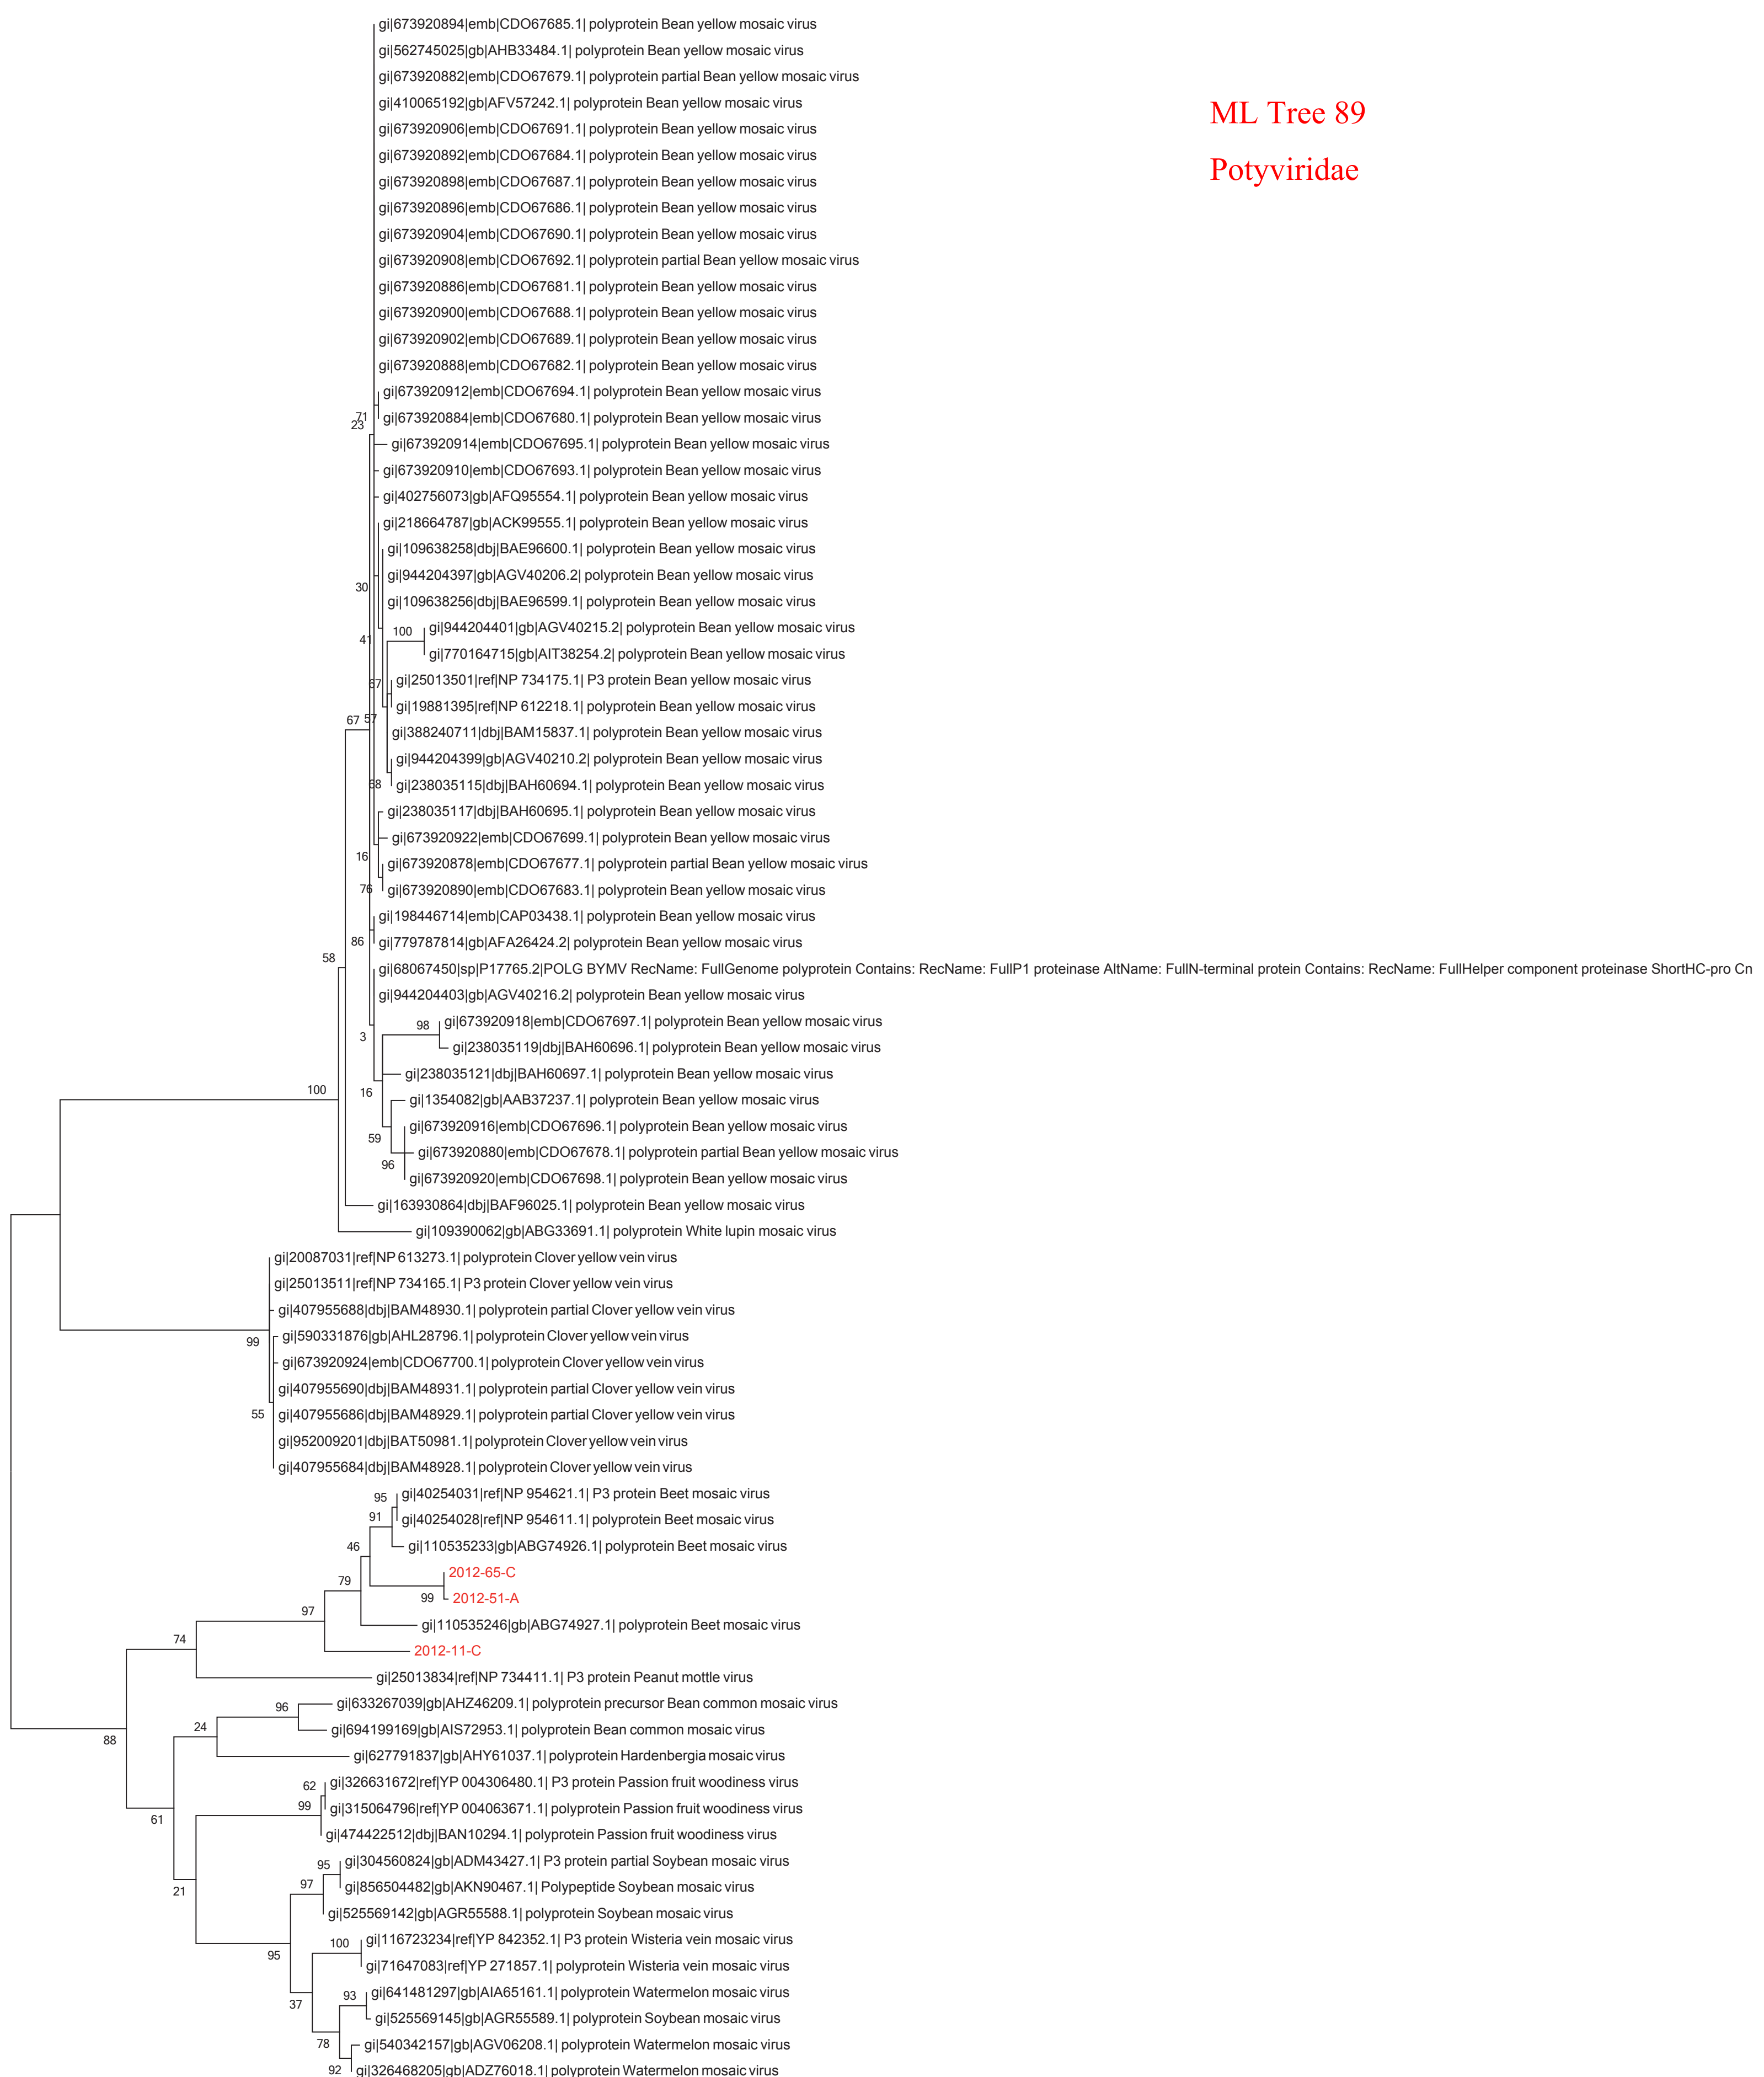



# ML Tree90

## Amalgaviridae

gi|213496076|ref|YP\_002321509.1| fusion protein p122 Southern tomato virus  
gi|923057524|gb|ALB05811.1| fusion protein RdRp Southern tomato virus  
gi|948271133|gb|ALM54938.1| fusion protein RdRp Southern tomato virus  
gi|167077480|gb|ABZ10949.1| fusion protein Southern tomato virus

2012-27-A

2012-54-F 3

1A-053

gi|306478698|ref|YP\_003868436.1| putative fusion protein Rhododendron virus A

1E-074

gi|308814348|ref|YP\_003934623.1| fusion protein Blueberry latent virus

gi|308097099|gb|ADO14118.1| fusion protein Blueberry latent virus

0.05

gi|213496076|ref|YP\_002321509.1| fusion protein p122 Southern tomato virus  
gi|923057524|gb|ALB05811.1| fusion protein RdRp Southern tomato virus  
gi|948271133|gb|ALM54938.1| fusion protein RdRp Southern tomato virus  
gi|167077480|gb|ABZ10949.1| fusion protein Southern tomato virus

**ML Tree 91**

**1B-012**

**1G-064**

**80-1C**

gi|306478698|ref|YP\_003868436.1| putative fusion protein Rhododendron virus A

gi|308814348|ref|YP\_003934623.1| fusion protein Blueberry latent virus

gi|308097099|gb|ADO14118.1| fusion protein Blueberry latent virus

**Amalgaviridae**

0.1

# ML Tree 92

## Amalgaviridae

gi|308097021|gb|ADO14066.1| fusion protein partial Blueberry latent virus  
gi|308097039|gb|ADO14078.1| fusion protein partial Blueberry latent virus  
gi|308097006|gb|ADO14056.1| fusion protein partial Blueberry latent virus  
gi|308097054|gb|ADO14088.1| fusion protein partial Blueberry latent virus  
gi|308097069|gb|ADO14098.1| fusion protein partial Blueberry latent virus  
gi|308097093|gb|ADO14114.1| fusion protein partial Blueberry latent virus  
gi|308097009|gb|ADO14058.1| fusion protein partial Blueberry latent virus  
gi|308097018|gb|ADO14064.1| fusion protein partial Blueberry latent virus  
gi|308097000|gb|ADO14052.1| fusion protein partial Blueberry latent virus  
gi|308096997|gb|ADO14050.1| fusion protein partial Blueberry latent virus  
gi|308814348|ref|YP\_003934623.1| fusion protein Blueberry latent virus  
gi|308097099|gb|ADO14118.1| fusion protein Blueberry latent virus

gi|224094849|ref|XP\_002310263.1| hypothetical protein POPTR\_0007s13310g Populus trichocarpa

1E-028

1B-077

48-1B

48-1F

2012-38-F

2012-28-B

2012-44-F

gi|306478698|ref|YP\_003868436.1| putative fusion protein Rhododendron virus A

33-1B

2012-65-C

74-1A

24-1G

22-1A

2012-09-A

2012-21-A 2

gi|86451112|gb|ABC96787.1| RNA-dependent RNA polymerase-like protein partial Southern tomato virus

1J-075

gi|213496076|ref|YP\_002321509.1| fusion protein p122 Southern tomato virus

gi|923057524|gb|ALB05811.1| fusion protein RdRp Southern tomato virus

gi|948271133|gb|ALM54938.1| fusion protein RdRp Southern tomato virus

gi|167077480|gb|ABZ10949.1| fusion protein Southern tomato virus

0.1



ML Tree 93  
Betaflexiviridae

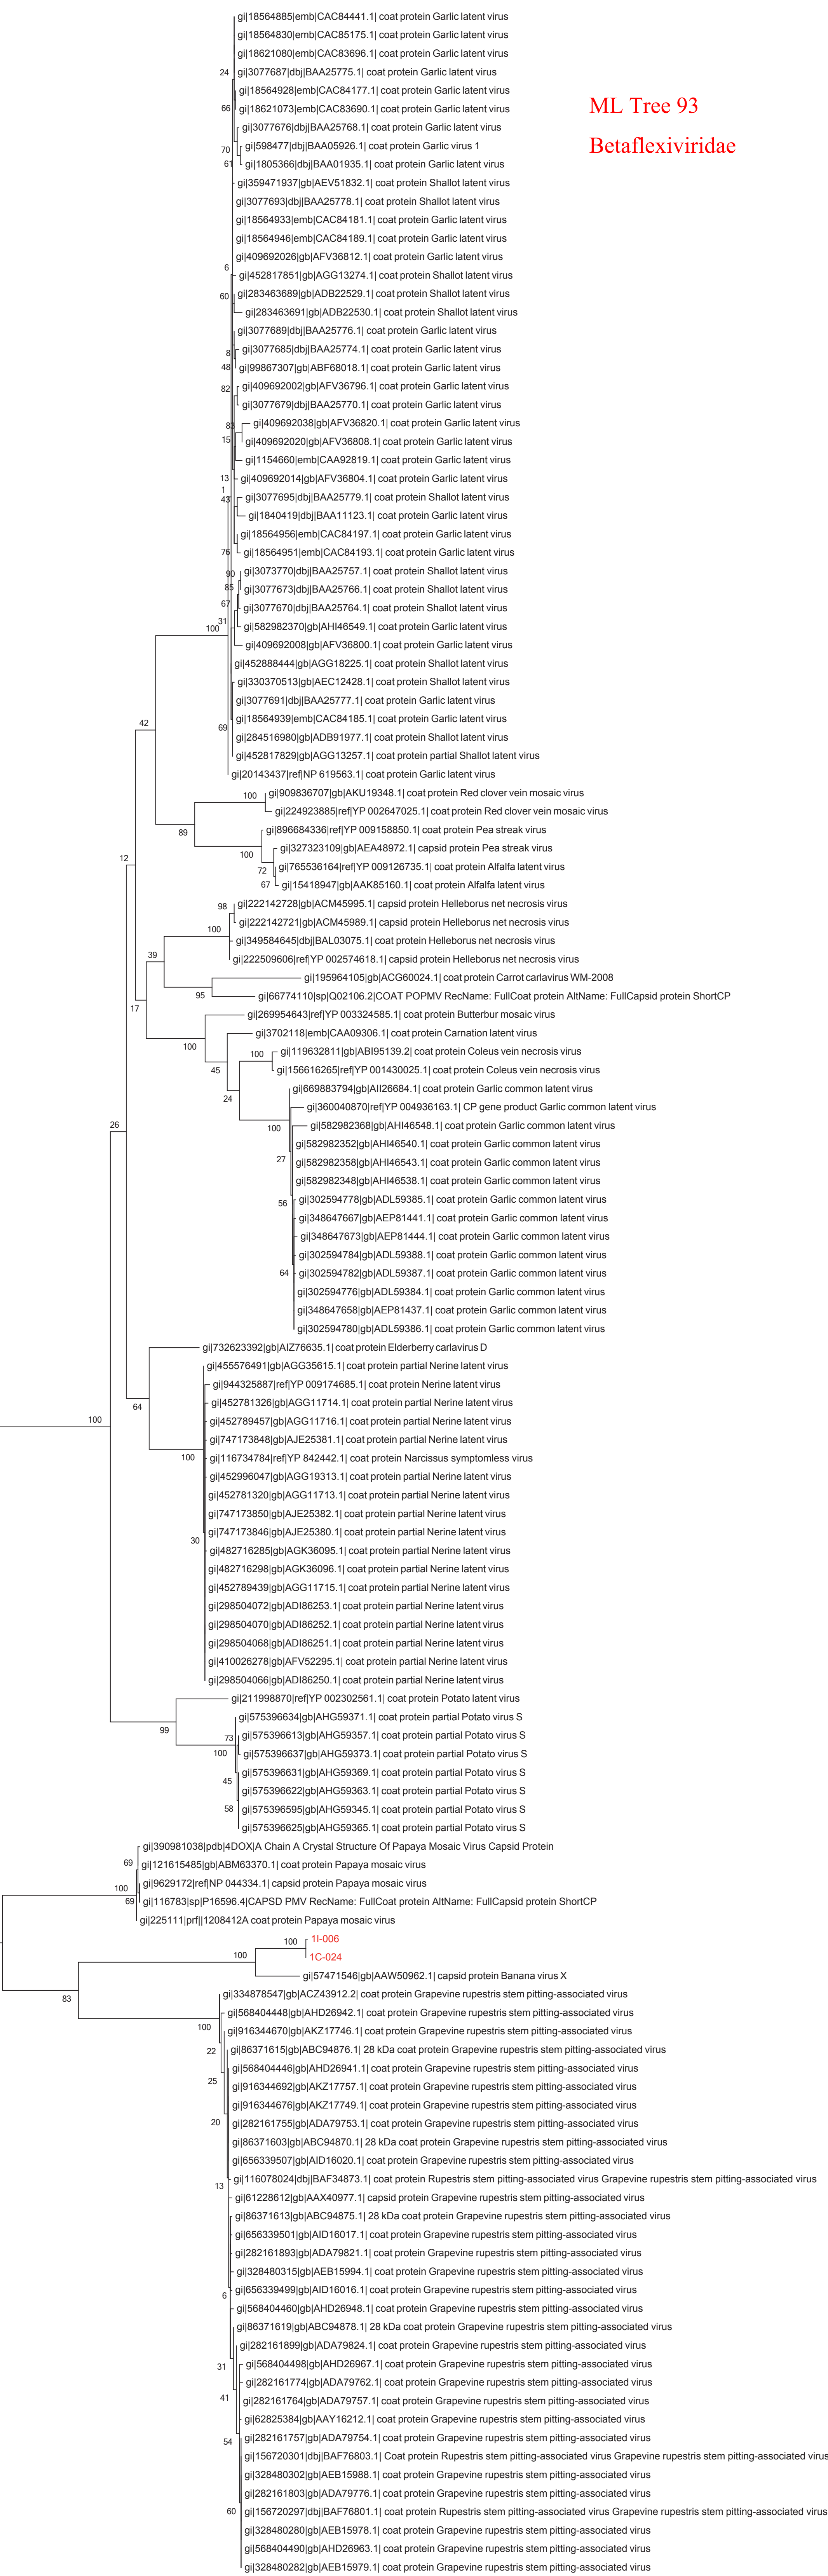

0.2

# ML Tree 94

## Amalgaviridae

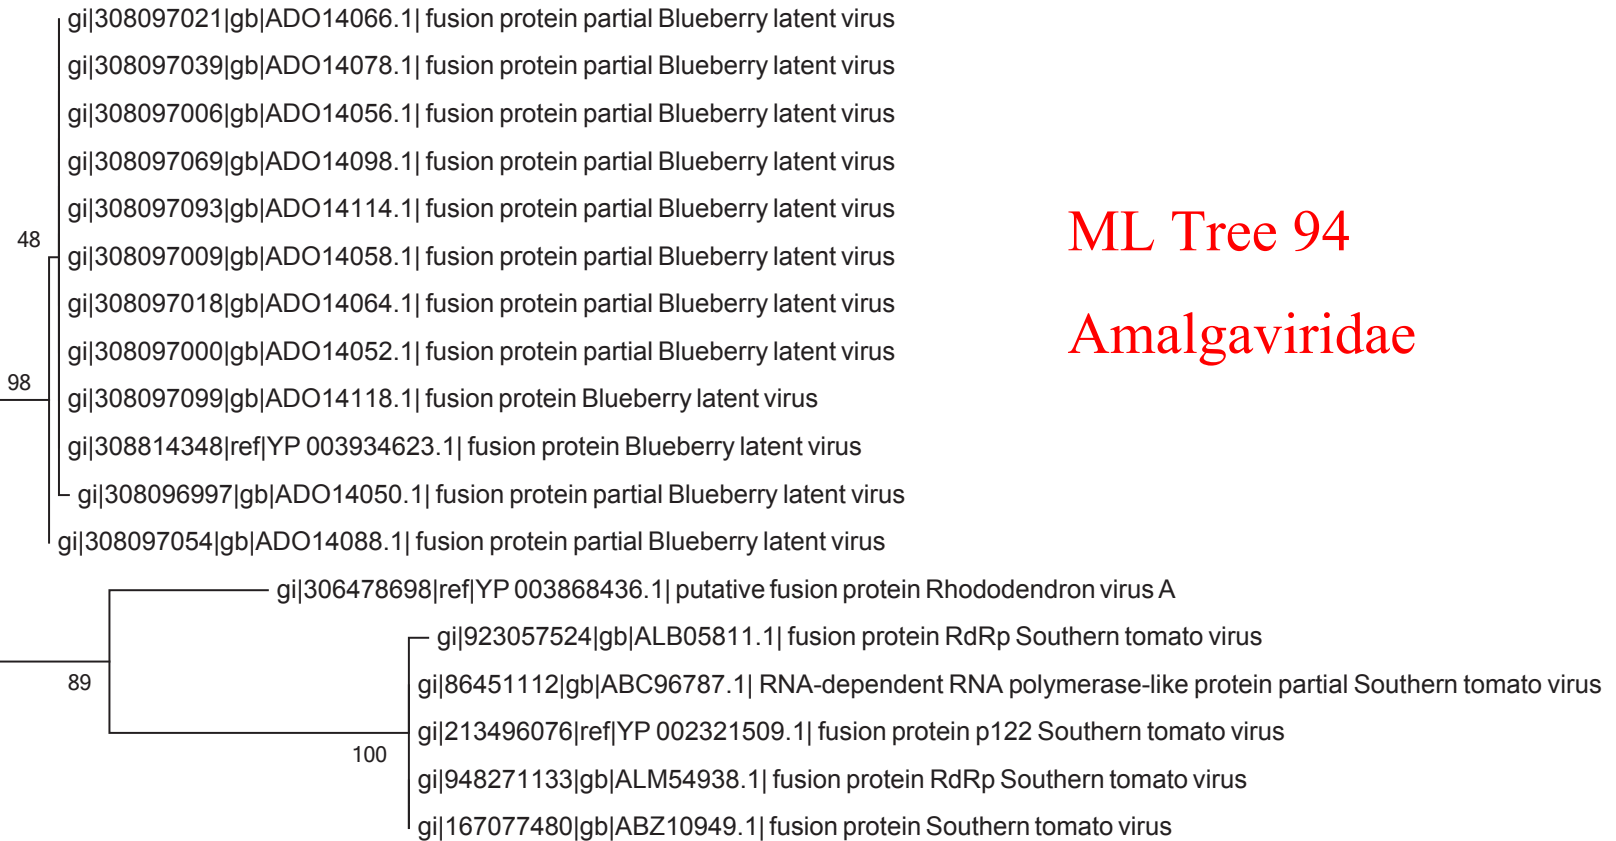

2012-22-F

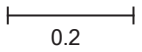

# ML Tree 95

## Amalgaviridae

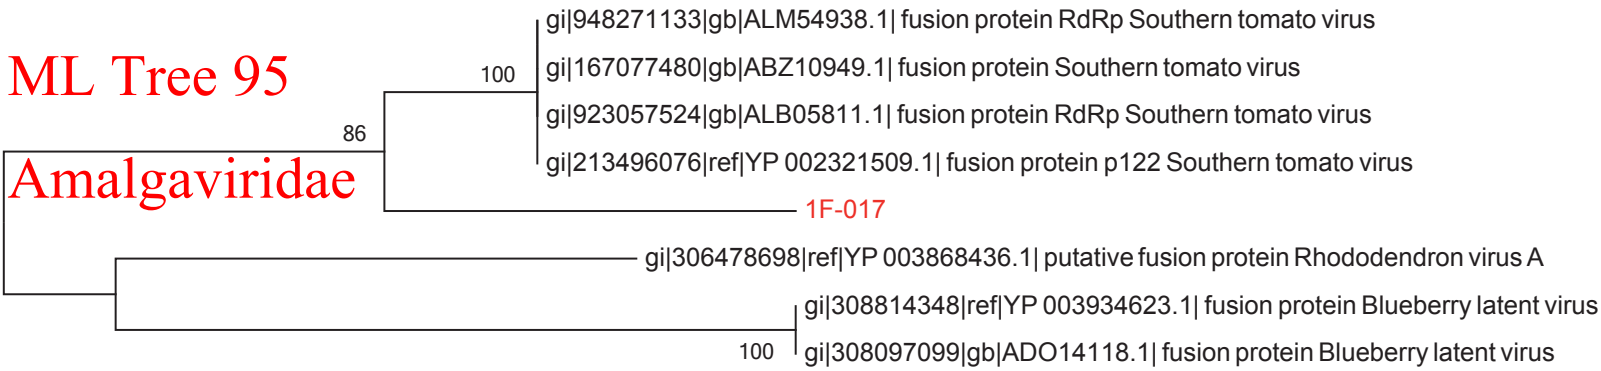

Supplement: ismej2017155x5.pdf [file ismej2017155x5.pdf]
