# Supplementary material for: Geometagenomics illuminates the impact of agriculture on the distribution and prevalence of plant viruses at the ecosystem scale
Source: PubMed Central journal article supplement (PMC5739011; doi:10.1038/ismej.2017.155), 2017-10-20

Supplementary Figure 2

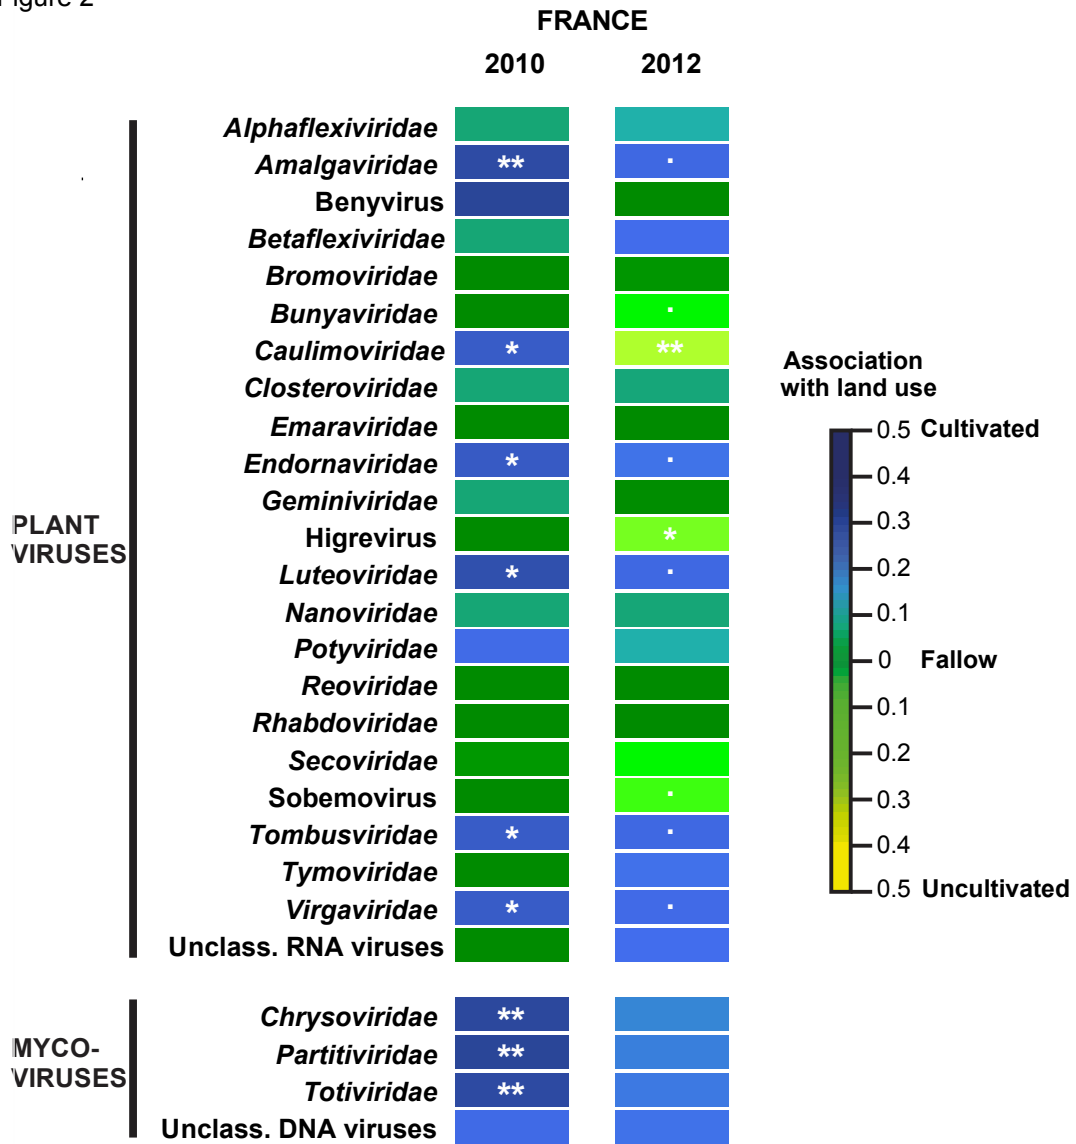

Supplement: ismej2017155x3.pdf [file ismej2017155x3.pdf]
